# Supplementary material for: Comparison between 2D and 3D microstructures and implications for metamorphic constraints using a chloritoid–garnet-bearing mica schist
Source: Copernicus journal article supplement (doi:10.5194/ejm-36-381-2024), 2024-05-03
Supplement: Supplementary file 2 [file ejm-36-381-2024-supplement.zip]

Archive with 7 entries (7 files):
- Figure S2.png
- Figure S1.png
- Supplementary captions.pdf
- Table S3.xlsx
- ejm-36-381-2024-supplement-title-page.pdf
- Table S1.xls
- Table S2.xlsx
