# Supplementary material for: Comparison between 2D and 3D microstructures and implications for metamorphic constraints using a chloritoid–garnet-bearing mica schist
Source: Copernicus journal article supplement (doi:10.5194/ejm-36-381-2024), 2024-05-03
Supplement: Supplementary file 2 [file ejm-36-381-2024-supplement.zip › ejm-36-381-2024-supplement-title-page.pdf]

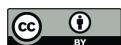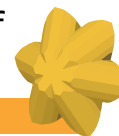

*Supplement of*

**Comparison between 2D and 3D microstructures and implications for metamorphic constraints using a chloritoid–garnet-bearing mica schist**

**Fabiola Caso et al.**

*Correspondence to:* Alessandro Petroccia ([alessandro.petrocci2@unibo.it](mailto:alessandro.petrocci2@unibo.it))

- [ejm-36-381-2024-supplement-title-page.pdf](#)
- [Figure S1.png](#)
- [Figure S2.png](#)
- [Supplementary captions.pdf](#)
- [Table S1.xls](#)
- [Table S2.xlsx](#)
- [Table S3.xlsx](#)

The copyright of individual parts of the supplement might differ from the article licence.
