# Supplementary material for: Comparison between 2D and 3D microstructures and implications for metamorphic constraints using a chloritoid–garnet-bearing mica schist
Source: Copernicus journal article supplement (doi:10.5194/ejm-36-381-2024), 2024-05-03
Supplement: Supplementary file 2 [file ejm-36-381-2024-supplement.zip › Table S1.xls]

## Sheet: K-Wm
OBJECTID	TARGET_FID	Width	Length	Area	Aspect Ratio	Perimeter	Roundness	Mineral Code	Shape_Length	Shape_Area	Length Orientation (Clockwise from vertical direction: 0°; 180°)	Equivalent Diameter	Shape Factor 1	Shape Factor 2	Mineral
1	251	72.5936	130.644	6697.58	1.79967	350.22	0.555659	6	66.2042	239.335	78.819	92.3685	1.2075	0.685843	K-Wm
2	252	204.619	262.979	30996.9	1.28521	885.958	0.778081	6	167.478	1107.66	82.9516	198.712	1.41991	0.495999	K-Wm
4	276	96.9161	128.247	8770.24	1.32328	370.552	0.755701	6	70.0477	313.401	85.4076	105.699	1.11647	0.802236	K-Wm
5	277	89.7256	224.81	12255.2	2.50552	535.091	0.399118	6	101.151	437.933	83.5358	124.947	1.36387	0.537592	K-Wm
6	278	134.426	169.907	13826.2	1.26394	536.5	0.791176	6	101.418	494.074	60.0919	132.714	1.28743	0.603328	K-Wm
7	290	78.0293	146.718	7139.76	1.88029	368.177	0.531833	6	69.5986	255.136	82.1099	95.3689	1.22948	0.661547	K-Wm
8	296	169.28	300.14	30914.7	1.77304	802.101	0.564004	6	151.626	1104.72	90	198.449	1.28722	0.603528	K-Wm
9	297	205.171	270.168	35992.7	1.3168	899.29	0.759418	6	169.998	1286.18	138.944	214.127	1.33751	0.55899	K-Wm
10	305	70.8231	144.239	6391.08	2.0366	352.499	0.491014	6	66.6349	228.382	64.1713	90.2303	1.24416	0.646024	K-Wm
16	351	261.528	358.426	51440.2	1.37051	1125.5	0.729658	6	212.759	1838.19	101.634	255.986	1.40022	0.51004	K-Wm
18	358	89.3919	213.165	10162.9	2.38462	510.593	0.419355	6	96.5203	363.168	58.6713	113.782	1.42913	0.48962	K-Wm
19	361	169.057	305.86	30251.1	1.80922	848.916	0.552725	6	160.476	1081.01	47.1028	196.307	1.37721	0.527233	K-Wm
20	367	88.8537	136.465	8750.27	1.53585	365.355	0.651107	6	69.0652	312.687	122.471	105.579	1.10207	0.823344	K-Wm
21	368	83.6818	161.905	8252.91	1.93477	406.215	0.516857	6	76.7893	294.914	30.1512	102.534	1.26171	0.62818	K-Wm
22	369	157.044	301.227	26443.1	1.9181	823.13	0.521348	6	155.601	944.935	79.0436	183.536	1.42829	0.490192	K-Wm
23	374	142.955	190.867	17653.9	1.33516	587.706	0.748974	6	111.098	630.856	89.9797	149.964	1.24809	0.641965	K-Wm
26	382	153.562	275.441	26607.4	1.79369	745.659	0.557511	6	140.956	950.805	90.2768	184.105	1.28986	0.601051	K-Wm
31	396	84.8069	114.917	6334.64	1.35504	334.114	0.737983	6	63.1596	226.366	42.2262	89.831	1.18451	0.712724	K-Wm
32	397	108.248	283.699	18676.9	2.62082	653.016	0.38156	6	123.443	667.41	69.7232	154.247	1.34827	0.550106	K-Wm
34	410	64.5695	219.018	9889.9	3.39198	508.497	0.294813	6	96.1243	353.411	85.8029	112.243	1.44277	0.480401	K-Wm
38	429	70.4789	180.689	8587.25	2.56374	445.922	0.390056	6	84.2953	306.862	73.9781	104.59	1.3578	0.542408	K-Wm
39	430	168.644	203.29	20654.9	1.20544	658.148	0.829571	6	124.414	738.093	31.173	162.21	1.29216	0.598915	K-Wm
40	431	111.821	274.788	18066.2	2.4574	647.175	0.406934	6	122.339	645.588	107.879	151.704	1.35861	0.541767	K-Wm
41	432	227.121	382.636	44692.3	1.68473	1039.88	0.593568	6	196.574	1597.06	51.3871	238.606	1.38794	0.51911	K-Wm
42	435	170.045	332.078	37707.5	1.95288	957.329	0.512064	6	180.969	1347.46	80.3112	219.169	1.39108	0.516767	K-Wm
43	436	136.249	236.344	21562.2	1.73464	625.398	0.576488	6	118.223	770.515	81.7176	165.734	1.20175	0.69242	K-Wm
44	439	198.734	224.824	29301.8	1.13128	824.221	0.883952	6	155.807	1047.09	113.962	193.202	1.35863	0.541748	K-Wm
47	446	83.8007	148.505	7957.44	1.77212	380.698	0.564296	6	71.9657	284.356	148.749	100.682	1.2042	0.689605	K-Wm
48	453	61.0777	139.218	6973.91	2.27935	361.285	0.438721	6	68.2959	249.21	87.1376	94.2548	1.22072	0.671066	K-Wm
49	454	156.997	246.047	24521.8	1.5672	717.18	0.638079	6	135.573	876.277	70.1745	176.743	1.29228	0.598806	K-Wm
50	455	157.372	219.293	25880.1	1.39347	648.168	0.717633	6	122.527	924.814	95.0926	181.572	1.13687	0.773713	K-Wm
52	461	91.6289	237.723	12583.7	2.59442	609.368	0.385443	6	115.192	449.674	111.801	126.611	1.53278	0.425638	K-Wm
53	462	86.0559	196.462	10961.5	2.28296	459.243	0.438027	6	86.8134	391.703	68.2254	118.168	1.23769	0.652789	K-Wm
54	468	94.8007	221.329	12083.6	2.33467	544.105	0.428325	6	102.855	431.801	88.0329	124.069	1.39666	0.512649	K-Wm
55	469	108.31	180.159	11376.1	1.66335	467.671	0.601195	6	88.4066	406.522	49.0938	120.382	1.23722	0.653286	K-Wm
57	472	105.508	205.052	12245.2	1.94347	538.115	0.514543	6	101.723	437.576	0.903978	124.896	1.37214	0.531135	K-Wm
59	476	109.068	176.247	12625.3	1.61594	505.581	0.618837	6	95.573	451.158	93.8603	126.819	1.26963	0.620366	K-Wm
60	479	114.71	224.852	15141	1.96018	599.522	0.510157	6	113.331	541.058	113.816	138.881	1.37478	0.529097	K-Wm
62	484	82.2596	117.776	6435.13	1.43176	327.67	0.69844	6	61.9414	229.956	81.1439	90.5407	1.15256	0.752789	K-Wm
63	485	156.702	236.619	22313.1	1.51	702.709	0.662253	6	132.837	797.351	114.795	168.595	1.32739	0.567545	K-Wm
64	486	83.8413	195.047	12808.6	2.32638	487.374	0.429852	6	92.1311	457.71	86.6142	127.737	1.21511	0.677279	K-Wm
66	488	176.51	431.168	48048.8	2.44274	1143.87	0.409376	6	216.233	1717.01	94.92	247.404	1.47245	0.46123	K-Wm
68	490	125.16	140.688	12926.4	1.12406	502.22	0.889634	6	94.9376	461.918	67.3999	128.323	1.24641	0.643693	K-Wm
69	495	197.116	240.58	32316.6	1.2205	717.219	0.819337	6	135.58	1154.82	101.31	202.898	1.12576	0.789062	K-Wm
70	500	102.738	140.788	10718.9	1.37036	423.669	0.729735	6	80.0887	383.036	84.8606	116.853	1.15467	0.750044	K-Wm
71	501	157.165	267.892	24562.1	1.70452	704.071	0.586674	6	133.095	877.715	106.588	176.888	1.26762	0.62233	K-Wm
72	506	89.0633	125.796	8261.73	1.41243	356.542	0.708	6	67.3993	295.229	111.05	102.589	1.10683	0.816279	K-Wm
73	507	105.699	372.106	24594.3	3.52045	900.357	0.284055	6	170.2	878.866	74.9315	177.004	1.61996	0.38106	K-Wm
74	508	126.259	188.669	13541.1	1.4943	524.846	0.66921	6	99.2147	483.884	119.312	131.338	1.27265	0.617417	K-Wm
75	513	134.042	216.081	17990.1	1.61204	591.437	0.62033	6	111.803	642.869	98.1708	151.385	1.24422	0.645961	K-Wm
76	514	131.978	304.152	20516	2.30456	809.234	0.433922	6	152.974	733.132	78.2596	161.663	1.59416	0.393491	K-Wm
77	519	106.328	175.787	13270.3	1.65326	499.292	0.604867	6	94.384	474.208	84.2894	130.018	1.22298	0.668592	K-Wm
78	520	96.1057	248.111	13892.9	2.58164	624.791	0.38735	6	118.108	496.458	111.294	133.034	1.49569	0.447007	K-Wm
81	527	93.2703	168.976	10399.8	1.81168	456.577	0.551973	6	86.3094	371.633	78.285	115.101	1.2633	0.626595	K-Wm
82	532	228.161	272.001	41760.7	1.19215	963.158	0.838824	6	182.071	1492.3	118.718	230.648	1.3299	0.565408	K-Wm
83	533	146.322	292.487	22737.2	1.99893	821.269	0.500268	6	155.249	812.504	103.737	170.19	1.53682	0.423405	K-Wm
85	539	159.5	312.764	34947.9	1.9609	912.252	0.50997	6	172.448	1248.85	103.232	210.997	1.37692	0.52745	K-Wm
86	540	92.2168	150.639	9448.54	1.63353	400.629	0.61217	6	75.7332	337.64	137.264	109.71	1.16296	0.739384	K-Wm
87	541	149.888	188.031	16307.8	1.25448	586.778	0.797145	6	110.922	582.753	15.7017	144.133	1.29652	0.594893	K-Wm
88	542	78.7535	117.633	7361.35	1.49369	349.32	0.669484	6	66.0341	263.055	101.807	96.8376	1.14881	0.757704	K-Wm
89	543	93.4825	187.391	12990.1	2.00455	473.166	0.498865	6	89.4453	464.194	145.063	128.638	1.17142	0.728743	K-Wm
91	548	96.2643	209.394	13926.5	2.1752	558.542	0.459727	6	105.585	497.656	136.236	133.194	1.33549	0.560685	K-Wm
92	549	129.183	186.35	16296.6	1.44253	607.696	0.693226	6	114.876	582.353	6.84277	144.083	1.34321	0.554262	K-Wm
93	550	162.895	261.63	22706.9	1.60613	751.061	0.622616	6	141.978	811.423	159.884	170.077	1.40638	0.505589	K-Wm
97	554	108.789	129.427	9901.42	1.1897	400.334	0.840545	6	75.6775	353.823	130.15	112.309	1.13522	0.775966	K-Wm
98	556	116.159	178.886	14048.1	1.54001	542.843	0.649346	6	102.617	502.004	128.462	133.775	1.29232	0.598769	K-Wm
99	557	78.2808	137.633	7364.37	1.7582	366.29	0.568763	6	69.242	263.163	76.9564	96.8574	1.20438	0.689406	K-Wm
100	562	59.3288	195.828	8846.55	3.30072	456.227	0.302964	6	86.2432	316.128	92.8123	106.158	1.36867	0.533829	K-Wm
101	563	129.707	387.412	24632.1	2.98682	920.965	0.334805	6	174.095	880.217	78.0513	177.14	1.65576	0.364758	K-Wm
103	565	94.7101	123.326	8128.03	1.30215	369.074	0.767963	6	69.7682	290.452	68.6767	101.755	1.15512	0.74946	K-Wm
104	566	98.0136	220.825	13099.8	2.253	583.516	0.443853	6	110.306	468.115	104.302	129.181	1.43855	0.483223	K-Wm
107	571	196.284	338.33	39386.1	1.72368	995.09	0.580155	6	188.108	1407.44	98.7285	223.994	1.4148	0.499583	K-Wm
109	576	167.737	486.704	45084.2	2.9016	1198.71	0.344638	6	226.598	1611.07	90.3807	239.65	1.59296	0.394084	K-Wm
110	581	86.9584	204.477	12102.6	2.35144	521.668	0.425272	6	98.6141	432.48	69.9255	124.166	1.33801	0.558571	K-Wm
111	582	449.936	1143.94	180769	2.54246	3569.47	0.393321	6	674.759	6459.71	67.4816	479.874	2.3689	0.178199	K-Wm
116	594	118.926	187.001	13739.1	1.57241	577.705	0.635965	6	109.207	490.96	97.125	132.295	1.3907	0.517053	K-Wm
117	595	75.3781	159.671	6696.51	2.11826	392.415	0.472085	6	74.1806	239.297	93.09	92.3612	1.35309	0.546193	K-Wm
118	596	107.244	210.212	12971.5	1.96012	547.051	0.510172	6	103.412	463.53	85.5383	128.546	1.35531	0.544407	K-Wm
119	599	100.695	205.176	14033.6	2.03759	563.453	0.490775	6	106.513	501.486	73.8108	133.706	1.34208	0.555194	K-Wm
122	602	91.7058	182.961	11296.5	1.99509	476.491	0.501231	6	90.0739	403.674	83.5447	119.96	1.26499	0.624918	K-Wm
123	604	173.21	425.921	36248.4	2.45898	1118.62	0.406672	6	211.459	1295.32	107.819	214.887	1.65784	0.363844	K-Wm
125	606	98.3949	133.674	8618.72	1.35855	392.684	0.736079	6	74.2314	307.986	56.5533	104.782	1.19351	0.702014	K-Wm
131	616	53.2835	144.851	6118.26	2.71849	356.743	0.367851	6	67.4373	218.634	86.8202	88.2835	1.28691	0.603818	K-Wm
135	623	84.1002	134.864	6357.35	1.60362	375.748	0.623591	6	71.0298	227.177	64.9134	89.9918	1.32973	0.565552	K-Wm
136	627	72.2383	135.009	6370.38	1.86894	337.955	0.535064	6	63.8856	227.643	71.7057	90.084	1.19476	0.700547	K-Wm
138	629	77.29	212.609	11664.3	2.7508	536.951	0.363531	6	101.503	416.82	87.8299	121.898	1.40285	0.508136	K-Wm
139	630	100.277	143.962	9169.28	1.43564	405.905	0.696554	6	76.7306	327.66	74.5274	108.077	1.19609	0.698998	K-Wm
140	631	163.99	454.983	40653.3	2.77446	1127.15	0.360431	6	213.072	1452.73	90	227.569	1.57739	0.401904	K-Wm
144	639	84.8356	131.974	7354.05	1.55564	344.609	0.642821	6	65.1436	262.794	90.5946	96.7895	1.13389	0.777789	K-Wm
146	646	195.242	324.388	36166.8	1.66147	985.625	0.601877	6	186.319	1292.41	127.023	214.645	1.46239	0.467602	K-Wm
150	652	120.798	259.375	23059.4	2.14718	661.44	0.465727	6	210.939	1442.47	88.3377	171.392	1.22905	0.661999	K-Wm
151	653	101.364	133.432	8479	1.31636	371.242	0.759672	6	70.1781	302.993	53.8119	103.929	1.1376	0.772716	K-Wm
153	657	147.179	407.138	34330.3	2.76627	1021.2	0.361498	6	193.044	1226.78	78.2749	209.124	1.55517	0.413469	K-Wm
154	658	148.465	400.998	38813.2	2.70097	1003.59	0.370238	6	189.714	1386.97	81.4844	222.359	1.43737	0.484016	K-Wm
155	659	146.35	215.122	16652.6	1.46991	639.762	0.680313	6	120.938	595.075	110.73	145.649	1.39888	0.511018	K-Wm
156	661	91.1411	169.446	11288.4	1.85917	439.355	0.537876	6	83.0538	403.387	104.15	119.917	1.16682	0.7345	K-Wm
157	662	145.295	221.425	18808.2	1.52397	659.803	0.656183	6	124.727	672.102	47.2609	154.788	1.35752	0.542634	K-Wm
159	667	88.8941	106.609	6641.18	1.19928	319.003	0.833834	6	60.3029	237.32	166.156	91.9788	1.10453	0.819684	K-Wm
160	668	142.837	217.248	17856.1	1.52095	633.774	0.657486	6	119.806	638.082	90.0263	150.82	1.33828	0.558352	K-Wm
162	670	92.9605	125.558	8747.85	1.35066	358.879	0.740379	6	67.841	312.601	85.7573	105.564	1.08269	0.85309	K-Wm
164	675	139.195	276.043	25151.8	1.98314	739.609	0.504251	6	139.813	898.787	99.9262	178.998	1.3159	0.577502	K-Wm
167	678	88.6936	169.462	10041.5	1.91064	420.738	0.523384	6	79.5346	358.83	86.9872	113.101	1.18472	0.712469	K-Wm
168	679	123.384	215.911	18020	1.74991	609.298	0.571458	6	115.179	643.935	141.609	151.51	1.28073	0.609655	K-Wm
172	683	115.067	206.5	15129.9	1.79462	571.033	0.557222	6	151.127	890.494	92.3832	138.83	1.30993	0.58278	K-Wm
173	684	231.635	273.167	36729.7	1.1793	1126	0.847963	6	212.854	1312.52	69.1455	216.309	1.65781	0.363856	K-Wm
175	687	84.9509	217.036	11734.8	2.55483	506.647	0.391415	6	95.7745	419.338	90.0882	122.265	1.31969	0.574187	K-Wm
176	688	205.76	315.657	39737.9	1.5341	960.571	0.651846	6	311.063	2861.09	108.435	224.992	1.35967	0.540923	K-Wm
181	694	96.5972	134.672	9835.46	1.39416	380.375	0.71728	6	71.9045	351.466	111.801	111.934	1.08223	0.853809	K-Wm
184	700	81.5227	148.302	7933.48	1.81915	394.355	0.549708	6	74.5473	283.5	73.8373	100.53	1.24928	0.640734	K-Wm
185	701	122.737	190.199	12837.2	1.54965	535.589	0.645309	6	101.246	458.732	137.822	127.879	1.33383	0.562078	K-Wm
188	705	83.8376	177.696	9201.57	2.11953	444.233	0.471802	6	83.976	328.814	106.313	108.267	1.30673	0.585638	K-Wm
189	706	68.04	124.434	6222.98	1.82884	314.43	0.546794	6	59.4385	222.376	81.6442	89.0358	1.12468	0.790571	K-Wm
190	707	135.501	207.46	18043.3	1.53107	576.715	0.653139	6	109.02	644.77	59.9314	151.608	1.21146	0.681372	K-Wm
191	708	194.353	349.616	35735.5	1.79887	1023.43	0.555906	6	193.466	1276.99	112.971	213.361	1.52762	0.42852	K-Wm
193	713	123.967	203.128	14900.2	1.63856	564.74	0.61029	6	106.756	532.454	122.696	137.772	1.30544	0.586795	K-Wm
195	715	85.908	181.692	11373.9	2.11496	471.329	0.472821	6	89.0981	406.442	83.5551	120.371	1.24702	0.643061	K-Wm
197	717	107.598	179.375	13926.6	1.66708	484.273	0.599852	6	91.545	497.66	90.7078	133.195	1.15791	0.745852	K-Wm
199	723	118.839	277.156	20898.8	2.33221	680.311	0.428778	6	188.55	1010.22	76.9303	163.165	1.32786	0.567148	K-Wm
200	724	84.4645	181.995	11557.6	2.15469	469.051	0.464103	6	88.6675	413.006	84.8056	121.339	1.23109	0.659808	K-Wm
201	725	81.6492	153.147	9712.39	1.87567	405.17	0.533141	6	76.5916	347.068	83.4041	111.232	1.16006	0.74309	K-Wm
202	726	126.986	315.651	27227.8	2.48571	797.096	0.402299	6	150.68	972.974	88.9191	186.239	1.36304	0.538245	K-Wm
205	730	199.404	264.103	36311.1	1.32446	802.921	0.755023	6	151.781	1297.56	16.9649	215.072	1.18894	0.707429	K-Wm
206	731	103.263	172.558	11674.1	1.67106	496.597	0.598422	6	93.8746	417.167	38.6976	121.948	1.29688	0.594571	K-Wm
207	732	128.278	154.802	12518.5	1.20677	500.738	0.828659	6	366.652	3029.97	132.285	126.282	1.26281	0.627078	K-Wm
209	736	130.238	140.27	12570.9	1.07703	504.59	0.92848	6	95.3856	449.215	94.3987	126.546	1.26987	0.620124	K-Wm
210	737	108.492	258.31	18492	2.3809	637.065	0.420009	6	120.428	660.805	66.9114	153.482	1.32189	0.572277	K-Wm
211	738	213.058	296.416	41502.2	1.39125	951.463	0.718779	6	179.861	1483.06	91.5074	229.933	1.31784	0.575807	K-Wm
215	746	65.1105	240.073	11735.6	3.68717	548.821	0.271211	6	103.747	419.365	86.7359	122.269	1.4295	0.489364	K-Wm
216	747	92.9512	148.709	9268.03	1.59986	407.316	0.625056	6	76.9973	331.189	141.34	108.657	1.19383	0.701641	K-Wm
217	751	129.081	391.493	24877.6	3.03292	932.129	0.329715	6	176.206	888.992	118.828	178.02	1.66754	0.359622	K-Wm
218	752	219.706	646.626	77601.6	2.94315	1751.51	0.339773	6	331.099	2773.06	110.451	314.413	1.77412	0.317712	K-Wm
220	754	176.543	247.58	27977.4	1.40238	736.01	0.713076	6	139.132	999.759	80.5377	188.785	1.24161	0.648678	K-Wm
221	755	254.898	633.803	78620.1	2.48649	1758.36	0.402173	6	332.393	2809.46	82.8241	316.47	1.76948	0.319381	K-Wm
222	756	82.0994	167.141	9937.78	2.03584	425.123	0.491199	6	80.3636	355.122	33.2943	112.515	1.2033	0.690636	K-Wm
223	757	194.557	310.478	28096.7	1.59582	946.547	0.626636	6	178.931	1004.02	112.521	189.188	1.59338	0.393877	K-Wm
224	758	181.231	323.616	35109.6	1.78566	919.383	0.560018	6	173.796	1254.63	77.4945	211.484	1.38449	0.521702	K-Wm
226	760	79.9569	157.419	9543.45	1.9688	414.749	0.507923	6	78.4025	341.031	118.811	110.26	1.19795	0.696825	K-Wm
227	761	85.7367	199.482	11925.8	2.32668	507.322	0.429797	6	95.9021	426.162	95.2472	123.256	1.31083	0.58198	K-Wm
229	763	71.7158	150.074	9124.03	2.09262	400.42	0.477869	6	75.6938	326.043	86.4416	107.81	1.18284	0.714734	K-Wm
231	768	74.1568	201.056	11052	2.71123	494.388	0.368836	6	93.4571	394.938	90.0655	118.655	1.32695	0.567929	K-Wm
232	769	203.801	236.613	31130.7	1.161	816.159	0.861328	6	154.283	1112.44	176.659	199.141	1.30523	0.586988	K-Wm
233	770	97.046	170.939	12024.5	1.76143	470.699	0.567721	6	88.9791	429.692	118.438	123.765	1.2112	0.681665	K-Wm
235	772	74.7835	139.904	8052.86	1.87079	373.981	0.534534	6	70.6959	287.766	92.6575	101.284	1.17593	0.723169	K-Wm
236	773	132.89	222.613	15080.3	1.67517	646.704	0.596955	6	122.25	538.89	120.065	138.602	1.48595	0.452887	K-Wm
237	774	100.856	132.389	9266.48	1.31266	415.633	0.761814	6	78.5696	331.134	179.93	108.648	1.21831	0.673727	K-Wm
239	776	201.669	304.684	46898	1.51081	859.091	0.661897	6	162.399	1675.88	108.775	244.423	1.11935	0.798115	K-Wm
240	777	78.4873	168.029	9036.36	2.14084	445.55	0.467107	6	84.225	322.91	72.2492	107.291	1.32253	0.571729	K-Wm
242	779	169.207	300.106	32351.2	1.7736	938.765	0.563824	6	177.46	1156.06	80.7816	203.007	1.47271	0.461069	K-Wm
243	780	104.365	158.395	12309.3	1.51769	476.753	0.658895	6	90.1234	439.868	5.16306	125.222	1.2125	0.680201	K-Wm
244	781	121.805	190.977	15138.5	1.56789	529.458	0.637799	6	100.087	540.968	31.72	138.869	1.21421	0.67828	K-Wm
245	785	139.561	256.358	26683.7	1.83688	713.573	0.5444	6	134.891	953.53	67.3582	184.369	1.2326	0.658202	K-Wm
246	786	76.5432	147.75	8224.15	1.93028	391.243	0.518061	6	73.9589	293.887	98.5308	102.355	1.21732	0.674821	K-Wm
247	787	172.953	240.64	31595.4	1.39136	791.107	0.718721	6	149.548	1129.05	93.9772	200.621	1.25582	0.634077	K-Wm
250	790	110.281	205.697	15179	1.8652	542.652	0.536135	6	102.581	542.415	96.4629	139.055	1.24281	0.647424	K-Wm
251	791	128.722	233.171	21848.9	1.81144	652.817	0.552048	6	123.406	780.762	111.448	166.832	1.24618	0.643928	K-Wm
252	792	58.0205	156.305	6602.48	2.69396	395.91	0.371201	6	74.8412	235.937	95.8013	91.7105	1.37483	0.529059	K-Wm
254	795	172.181	305.864	26607.5	1.77641	807.175	0.562935	6	152.585	950.806	87.5806	184.106	1.39628	0.512929	K-Wm
255	796	146.519	232.403	16444.9	1.58617	660.058	0.630451	6	124.775	587.653	137.101	144.738	1.45235	0.474087	K-Wm
258	799	69.1049	197.443	8827.39	2.85716	461.404	0.349998	6	87.222	315.443	121.849	106.043	1.3857	0.520786	K-Wm
259	800	110.103	235.514	14701.9	2.13902	640.056	0.467503	6	120.994	525.365	126.84	136.852	1.48949	0.450739	K-Wm
261	803	78.5015	166.088	9665.99	2.11573	414.424	0.47265	6	78.3411	345.41	98.3864	110.966	1.1894	0.70688	K-Wm
262	804	142.498	439.209	28587.1	3.08221	1067.75	0.324443	6	201.844	1021.55	92.5348	190.832	1.78193	0.314932	K-Wm
263	805	222.084	255.481	32858.7	1.15038	816.968	0.86928	6	154.436	1174.19	106.504	204.593	1.2717	0.618343	K-Wm
264	806	113.585	233.637	14208.5	2.05693	619.44	0.48616	6	117.096	507.734	96.7202	134.536	1.46633	0.465092	K-Wm
265	808	206.382	252.324	33107.2	1.22261	937.868	0.817925	6	177.291	1183.07	11.3099	205.365	1.45441	0.472746	K-Wm
266	809	134.551	349.092	22882.3	2.59448	889.734	0.385433	6	168.192	817.689	89.1044	170.732	1.65965	0.363052	K-Wm
267	810	95.7203	115.985	8493.52	1.21171	370.628	0.82528	6	70.0621	303.512	112.853	104.018	1.13475	0.776605	K-Wm
268	811	126.693	137.997	13077.2	1.08922	449.037	0.918087	6	84.8841	467.307	90	129.069	1.10798	0.81459	K-Wm
269	812	78.6027	179.36	9790.23	2.28186	440.686	0.43824	6	83.3055	349.85	82.6992	111.676	1.25672	0.633176	K-Wm
270	813	121.136	156.612	13580.3	1.29286	492.315	0.773481	6	93.0652	485.286	81.7364	131.528	1.19205	0.703741	K-Wm
271	814	69.676	241.838	12064.9	3.47089	569.008	0.28811	6	107.563	431.136	76.9104	123.973	1.46171	0.468034	K-Wm
272	815	136.198	197.525	17175.3	1.45028	558.193	0.689521	6	105.519	613.751	57.6725	147.917	1.20182	0.692348	K-Wm
273	816	69.4131	133.159	6462.71	1.91836	339.846	0.52128	6	64.2431	230.942	102.705	90.7345	1.19283	0.702814	K-Wm
274	820	94.7649	107.463	7026.93	1.134	334.794	0.881835	6	63.288	251.104	57.9946	94.6124	1.12694	0.78741	K-Wm
275	821	97.5184	162.93	11548.8	1.67076	452.943	0.59853	6	85.6225	412.692	112.625	121.292	1.18927	0.707032	K-Wm
277	823	107.455	124.667	9150.04	1.16018	397.268	0.861936	6	75.098	326.973	97.125	107.963	1.17186	0.72819	K-Wm
279	825	91.2416	173.995	9907.2	1.90697	450.482	0.524393	6	85.1573	354.03	96.7002	112.342	1.27705	0.613177	K-Wm
280	826	143.697	151.55	15781.6	1.05465	524.096	0.948185	6	99.073	563.948	22.8317	141.788	1.17717	0.721637	K-Wm
281	827	121.756	226.745	19180.4	1.8623	612.537	0.536971	6	115.791	685.405	94.4326	156.313	1.24798	0.642072	K-Wm
282	828	95.7383	212.599	14098.8	2.22062	527.06	0.450324	6	99.6332	503.816	85.6113	134.016	1.25249	0.63746	K-Wm
283	829	121.534	200.277	15522.3	1.64791	577.966	0.606828	6	109.256	554.684	111.968	140.619	1.30897	0.583636	K-Wm
284	830	141.242	259.065	21977.3	1.83418	801.056	0.545202	6	151.428	785.349	21.5014	167.322	1.52469	0.430168	K-Wm
285	831	93.6778	130.614	9579.08	1.39429	402.133	0.717213	6	76.0175	342.304	70.042	110.466	1.15935	0.744002	K-Wm
286	832	132.009	148.289	15838.4	1.12333	499.696	0.890211	6	94.4605	565.978	73.0599	142.043	1.12036	0.796688	K-Wm
287	833	121.4	210.546	14958.6	1.73433	537.694	0.576593	6	101.643	534.54	113.916	138.042	1.24049	0.649846	K-Wm
288	834	224.241	271.534	42108.7	1.2109	917.998	0.82583	6	173.535	1504.74	162.061	231.607	1.26229	0.627594	K-Wm
289	835	129.272	222.04	15353.9	1.71761	577.676	0.582203	6	109.202	548.664	103.032	139.854	1.31547	0.577882	K-Wm
290	837	88.1857	212.144	14285.1	2.40565	512.427	0.415688	6	96.8671	510.47	86.9609	134.898	1.20975	0.683294	K-Wm
291	838	88.9573	91.5892	6393.2	1.02959	305.784	0.971264	6	57.8042	228.458	174.289	90.2453	1.0791	0.858772	K-Wm
293	840	109.996	150.465	12878.8	1.36792	459.863	0.731039	6	86.9307	460.219	67.1797	128.086	1.14339	0.764906	K-Wm
294	841	190.758	287.733	29742.1	1.50836	838.709	0.662972	6	158.546	1062.82	131.174	194.649	1.37224	0.531054	K-Wm
295	842	88.9606	167.547	10880.9	1.88338	452.917	0.53096	6	85.6177	388.826	122.735	117.733	1.22516	0.66622	K-Wm
297	844	117.958	235.54	16436.4	1.9968	636.781	0.5008	6	120.374	587.348	129.094	144.7	1.4015	0.509116	K-Wm
298	845	88.1387	126.502	7534.9	1.43526	393.608	0.696738	6	74.406	269.256	145.557	97.9724	1.27947	0.610858	K-Wm
300	847	113.474	237.556	19859.8	2.09349	629.462	0.477672	6	215.746	1687.01	86.3086	159.057	1.26034	0.629541	K-Wm
301	848	67.4981	159.432	8637.48	2.36202	409.219	0.423367	6	77.3571	308.657	85.859	104.896	1.24242	0.647836	K-Wm
303	854	116.496	252.069	18200.8	2.16375	668.798	0.46216	6	126.427	650.399	71.1849	152.269	1.3988	0.511082	K-Wm
305	856	176.032	252.392	26262.3	1.43379	733.729	0.697453	6	138.701	938.473	30.5827	182.908	1.27754	0.612705	K-Wm
306	857	220.828	281.368	37799.7	1.27415	977.4	0.784836	6	184.764	1350.76	116.303	219.437	1.41851	0.496973	K-Wm
308	862	97.7085	126.913	8519.86	1.2989	371.161	0.769884	6	70.1628	304.454	121.661	104.179	1.13462	0.776778	K-Wm
309	863	93.3238	296.872	16593.9	3.1811	706.666	0.314357	6	133.585	592.977	95.2417	145.392	1.54791	0.417359	K-Wm
310	864	107.086	162.003	10871.8	1.51283	451.621	0.661012	6	85.3725	388.499	80.1575	117.683	1.22216	0.669488	K-Wm
311	865	185.843	507.998	40618.7	2.73348	1309.84	0.365835	6	247.608	1451.49	72.3899	227.472	1.83384	0.297355	K-Wm
312	866	101.23	124.447	8209.55	1.22935	379.32	0.813441	6	71.7051	293.365	14.1176	102.264	1.18128	0.716634	K-Wm
314	868	142.109	298.794	22944.6	2.10256	841.413	0.475611	6	159.057	819.917	100.078	170.964	1.56738	0.407054	K-Wm
315	869	94.4395	153.627	9306.29	1.62672	401.743	0.614733	6	75.9439	332.556	143.973	108.881	1.17508	0.724217	K-Wm
316	870	95.6294	193.368	11100.7	2.02206	506.926	0.494545	6	95.8272	396.68	128.435	118.916	1.35761	0.542565	K-Wm
317	874	103.729	265.809	22323.6	2.56253	687.019	0.390239	6	129.871	797.724	96.2169	168.635	1.29745	0.594041	K-Wm
319	876	63.3568	129.689	5776.22	2.04696	319.632	0.488528	6	60.422	206.411	135.274	85.7802	1.18668	0.71012	K-Wm
320	878	74.184	136.008	7178.88	1.83338	354.414	0.545439	6	66.9971	256.534	102.785	95.6299	1.18029	0.717833	K-Wm
322	880	104.328	168.282	11143.2	1.613	465.427	0.619961	6	87.9825	398.197	94.0856	119.143	1.24409	0.646093	K-Wm
324	882	124.877	155.285	14665.9	1.2435	499.828	0.804182	6	94.4855	524.078	3.36646	136.684	1.16459	0.737319	K-Wm
326	887	79.6576	328.147	16441.3	4.11947	737.272	0.24275	6	139.371	587.521	75.7188	144.721	1.62243	0.3799	K-Wm
327	888	164.354	335.833	34897.2	2.04335	894.491	0.489392	6	169.091	1247.04	91.9435	210.844	1.3511	0.547808	K-Wm
328	889	96.6955	300.268	19720.2	3.1053	704.965	0.32203	6	133.264	704.694	85.6667	158.497	1.4165	0.498386	K-Wm
329	890	185.827	396.57	47514	2.13408	1029.49	0.468587	6	194.611	1697.89	105.796	246.023	1.33265	0.563074	K-Wm
330	891	163.57	314.072	28823.3	1.92011	917.218	0.520802	6	173.387	1029.99	44.5162	191.618	1.52443	0.430316	K-Wm
331	892	141.952	167.602	17309.4	1.1807	541.305	0.846959	6	102.326	618.545	40.9011	148.493	1.16093	0.741974	K-Wm
332	893	103.398	180.172	10740.2	1.74251	463.033	0.573883	6	87.5299	383.796	110.556	116.969	1.2607	0.629184	K-Wm
333	895	111.923	329.419	23583.1	2.94326	780.564	0.339759	6	147.555	842.731	69.2732	173.327	1.43421	0.486154	K-Wm
334	896	150.764	207.907	21365	1.37902	630.564	0.725152	6	119.199	763.471	101.689	164.975	1.21726	0.674893	K-Wm
335	897	70.5191	122.789	5988.96	1.74122	329.267	0.57431	6	62.2432	214.013	139.399	87.3456	1.20054	0.693818	K-Wm
336	898	338.285	560.171	102241	1.65591	1767.29	0.603897	6	334.081	3653.55	77.3088	360.893	1.55955	0.411152	K-Wm
339	903	286.021	544.313	75060.4	1.90305	1728.8	0.525472	6	326.805	2682.25	90.1034	309.222	1.78051	0.315437	K-Wm
341	905	115.472	154.836	12118.2	1.3409	441.379	0.745768	6	83.4364	433.037	91.3831	124.246	1.13135	0.781274	K-Wm
343	907	156.071	172.654	19750.2	1.10626	570.898	0.90395	6	107.92	705.766	153.67	158.618	1.14625	0.761105	K-Wm
344	908	271.722	328.734	47885.1	1.20982	1125.43	0.826571	6	212.747	1711.15	70.56	246.982	1.45119	0.474846	K-Wm
345	909	146.146	187.031	16955	1.27975	575.298	0.781401	6	108.752	605.881	4.84622	146.965	1.24666	0.643431	K-Wm
347	911	133.384	272.202	21847.4	2.04074	731.153	0.490019	6	138.214	780.707	75.307	166.826	1.39577	0.513301	K-Wm
348	912	139.58	264.38	24188.8	1.89411	667.004	0.527951	6	126.088	864.378	63.4349	175.539	1.21011	0.682885	K-Wm
349	913	95.7189	186.544	12669.3	1.94888	498.765	0.513116	6	94.2845	452.734	93.8974	127.041	1.25033	0.639664	K-Wm
350	914	108.563	291.617	20941.1	2.68616	679.321	0.372279	6	128.416	748.321	95.6737	163.33	1.32459	0.569953	K-Wm
351	916	180.96	211.697	25036.7	1.16986	761.882	0.854803	6	144.023	894.676	11.5957	178.589	1.35864	0.54174	K-Wm
352	917	176.723	255.839	26504.6	1.44768	759.431	0.690759	6	143.56	947.131	116.092	183.749	1.31623	0.577211	K-Wm
353	918	168.376	336.346	34073	1.99759	972.706	0.500603	6	183.876	1217.58	94.3987	208.339	1.4869	0.45231	K-Wm
354	919	248.901	340.446	44353.7	1.36779	1216.17	0.731104	6	229.9	1584.96	139.297	237.7	1.62943	0.376641	K-Wm
357	922	103.545	132.881	10293.4	1.28331	395.645	0.779233	6	74.7911	367.829	7.73202	114.51	1.10035	0.825917	K-Wm
358	923	86.0407	203.622	11157.1	2.36657	487.685	0.422552	6	92.19	398.694	94.2879	119.218	1.30277	0.589199	K-Wm
359	924	144.658	203.312	20151.8	1.40547	601.651	0.711507	6	113.734	720.116	39.9884	160.222	1.19589	0.699222	K-Wm
363	929	99.2932	174.256	11644.8	1.75497	490.076	0.569811	6	92.642	416.123	71.7265	121.796	1.28145	0.608969	K-Wm
364	930	264.278	417.942	62229.9	1.58145	1284.71	0.632333	6	242.857	2223.76	56.141	281.556	1.45315	0.473563	K-Wm
365	931	191.359	269.827	25739.9	1.41005	853.083	0.709192	6	161.263	919.806	0.100104	181.079	1.50035	0.444237	K-Wm
366	932	109.936	159.471	11118.3	1.45058	480.568	0.689379	6	90.8446	397.308	115.017	119.01	1.286	0.60467	K-Wm
367	933	125.268	193.991	13858.6	1.54861	578.283	0.645741	6	109.316	495.231	152.769	132.869	1.38607	0.520509	K-Wm
368	934	118.336	237.696	18260.5	2.00865	639.394	0.497847	6	120.868	652.531	113.199	152.518	1.33511	0.561003	K-Wm
369	935	151.332	415.314	35315.4	2.7444	1058.96	0.364379	6	200.181	1261.98	59.562	212.103	1.59002	0.395546	K-Wm
370	936	77.9868	155.838	9136.53	1.99826	406.628	0.500434	6	76.8674	326.49	75.6468	107.884	1.20036	0.694026	K-Wm
371	937	134.385	167.528	15936.5	1.24663	535.901	0.802163	6	101.305	569.483	103.534	142.482	1.19783	0.696967	K-Wm
372	940	87.5208	160.163	9055.94	1.82999	413.823	0.54645	6	78.2274	323.61	68.3296	107.407	1.22702	0.664193	K-Wm
373	941	106.818	194.877	11845.9	1.82439	512.449	0.548129	6	96.8713	423.308	110.18	122.843	1.32853	0.566573	K-Wm
374	942	104.522	149.016	10571.1	1.42568	432.318	0.701417	6	81.7237	377.752	87.0022	116.044	1.18645	0.710397	K-Wm
375	943	143.249	378.432	30182.2	2.64179	891.634	0.378532	6	168.551	1078.55	101.035	196.083	1.44816	0.476834	K-Wm
377	946	95.1156	123.892	8778.59	1.30254	370.904	0.767729	6	70.1142	313.699	164.72	105.749	1.117	0.801477	K-Wm
378	947	89.9911	116.172	8529.5	1.29093	351.977	0.774638	6	66.5362	304.798	89.9338	104.238	1.07537	0.86474	K-Wm
379	952	99.0586	292.473	20223.7	2.95252	689.383	0.338693	6	130.318	722.687	87.0426	160.508	1.36784	0.534478	K-Wm
380	953	119.019	191.835	14733.6	1.61181	541.46	0.620422	6	102.355	526.501	80.255	137	1.25868	0.631201	K-Wm
382	955	91.0252	139.768	9154.05	1.53549	396.234	0.651259	6	74.9024	327.116	29.7578	107.987	1.16856	0.732319	K-Wm
383	956	187.021	367.904	33564.5	1.96718	1038.26	0.508342	6	196.268	1199.41	118.955	206.778	1.59908	0.391073	K-Wm
384	957	137.55	185.488	19937.2	1.34851	581.257	0.741561	6	109.878	712.449	90.1153	159.367	1.16156	0.74117	K-Wm
385	958	106.107	185.67	13437.6	1.74984	485.205	0.571481	6	91.7211	480.188	90.5328	130.836	1.18105	0.716907	K-Wm
386	959	146.426	261.559	25908.6	1.78629	688.685	0.55982	6	130.186	925.832	62.726	181.672	1.20727	0.686106	K-Wm
387	960	115.487	196.823	12837.7	1.70428	532.302	0.586757	6	100.624	458.748	32.9337	127.882	1.32562	0.569062	K-Wm
388	962	166.868	248.185	24447.9	1.48732	758.967	0.672352	6	143.472	873.636	124.451	176.476	1.36964	0.533072	K-Wm
389	963	107.745	212.315	14787	1.97053	577.034	0.507477	6	109.08	528.408	36.9068	137.248	1.33896	0.557786	K-Wm
390	964	157.569	234.371	22319	1.48742	657.948	0.672306	6	124.376	797.559	83.1764	168.617	1.24268	0.64756	K-Wm
391	965	59.6783	196.546	8609.91	3.29342	471.665	0.303636	6	89.1617	307.671	80.5377	104.728	1.4343	0.486094	K-Wm
393	967	107.48	144.747	10031	1.34673	440.812	0.742539	6	83.3292	358.455	138.366	113.042	1.2419	0.64838	K-Wm
395	969	89.4436	161.847	10043.7	1.80949	425.537	0.552643	6	80.4419	358.907	81.4828	113.113	1.19811	0.696638	K-Wm
396	970	102.381	120.171	8546.63	1.17376	377.131	0.851964	6	71.2913	305.41	127.662	104.343	1.15106	0.754746	K-Wm
397	971	80.2257	189.635	10702.9	2.36377	471.337	0.423052	6	89.0997	382.462	18.334	116.766	1.28554	0.605098	K-Wm
398	972	107.588	215.452	12650.8	2.00257	551.114	0.499359	6	104.18	452.071	92.9908	126.947	1.38257	0.523148	K-Wm
399	973	79.4502	110.418	6380.19	1.38978	323.259	0.719537	6	61.1076	227.993	90.0055	90.1534	1.14193	0.766868	K-Wm
400	974	99.0777	155.858	11732.7	1.57309	432.145	0.635693	6	81.691	419.262	95.3424	122.254	1.12574	0.789091	K-Wm
401	975	124.128	252.574	19037	2.03479	702.866	0.491451	6	132.867	680.278	99.968	155.727	1.4374	0.483997	K-Wm
403	980	126.082	226.578	17713.6	1.79706	614.102	0.556463	6	116.087	632.988	85.2364	150.217	1.30194	0.589951	K-Wm
405	984	131.664	252.72	19421.3	1.91943	636.567	0.520988	6	120.334	694.014	118.012	157.291	1.28887	0.601978	K-Wm
406	985	106.259	177.258	13797.4	1.66816	509.57	0.599462	6	96.3271	493.045	144.162	132.576	1.22408	0.667389	K-Wm
407	986	200.972	387.199	40067.1	1.92663	1191.24	0.519041	6	225.186	1431.78	55.3204	225.922	1.67922	0.354636	K-Wm
408	987	219.113	329.523	44617	1.50389	1142.05	0.664941	6	215.888	1594.37	141.755	238.405	1.52559	0.429658	K-Wm
409	988	89.0409	119.027	7601.11	1.33677	335.324	0.748071	6	63.3884	271.623	113.166	98.402	1.08526	0.849056	K-Wm
410	991	114.63	272.975	17558.2	2.38135	696.265	0.41993	6	131.619	627.435	75.1105	149.557	1.48265	0.454905	K-Wm
411	992	62.196	149.065	5786.86	2.3967	350.988	0.41724	6	66.3494	206.791	76.9184	85.8591	1.3019	0.589993	K-Wm
413	994	125.279	149.187	12871.4	1.19084	483.841	0.839741	6	91.4634	459.954	126.87	128.049	1.20336	0.690572	K-Wm
414	995	131.421	228.504	18849.2	1.73871	639.529	0.575138	6	173.604	1146.18	84.144	154.957	1.31437	0.578844	K-Wm
415	996	173.573	222.107	26513.3	1.27962	695.037	0.781482	6	131.387	947.441	165.964	183.779	1.20443	0.689346	K-Wm
416	997	102.799	211.293	13907.3	2.0554	528.619	0.486524	6	99.928	496.971	86.8515	133.103	1.26481	0.625095	K-Wm
417	1000	79.6303	90.0149	5950.18	1.13041	295.957	0.884634	6	151.52	885.794	89.8682	87.0623	1.0826	0.853225	K-Wm
419	1002	81.8696	140.223	8543.03	1.71276	372.386	0.583854	6	70.3943	305.282	113.62	104.321	1.13682	0.773775	K-Wm
420	1003	89.4483	142.557	9989.65	1.59374	396.907	0.627455	6	75.0298	356.976	81.4784	112.808	1.12052	0.796456	K-Wm
422	1005	70.0279	127.921	5660.75	1.82672	325.157	0.547428	6	61.4664	202.285	59.0881	84.9185	1.21944	0.672477	K-Wm
424	1007	95.3848	119.234	8001.47	1.25003	342.879	0.79998	6	64.8165	285.929	59.8495	100.96	1.08159	0.854824	K-Wm
425	1008	123.836	191.113	14806.9	1.54328	534.31	0.647971	6	101.004	529.119	127.358	137.34	1.23899	0.651429	K-Wm
426	1009	78.5209	185.376	9926.46	2.36085	448.432	0.423576	6	84.7697	354.718	89.2594	112.451	1.27	0.619999	K-Wm
427	1011	157.688	428.554	39267.4	2.71773	1162.37	0.367954	6	219.73	1403.21	115.493	223.656	1.65513	0.365034	K-Wm
428	1012	128.554	148.209	11497.3	1.15289	466.025	0.867387	6	88.0955	410.851	54.6778	121.022	1.22636	0.664915	K-Wm
431	1015	203.187	321.49	44168.4	1.58224	884.195	0.632017	6	167.145	1578.34	92.1211	237.203	1.18713	0.709586	K-Wm
432	1016	128.888	249.715	21271.4	1.93746	636.096	0.51614	6	120.245	760.125	120.734	164.613	1.23064	0.6603	K-Wm
434	1019	116.722	192.512	13588.8	1.64932	518.537	0.606311	6	244.917	1332.22	109.666	131.57	1.25515	0.634762	K-Wm
435	1020	126.547	242.073	15996	1.91291	686.217	0.522765	6	129.72	571.609	70.0169	142.748	1.53095	0.426656	K-Wm
436	1021	129.465	193.188	16571	1.49221	552.522	0.670149	6	104.446	592.158	120.754	145.291	1.2111	0.681774	K-Wm
438	1023	115.915	136.544	10493.5	1.17797	406.979	0.848921	6	76.9337	374.98	21.8014	115.618	1.12103	0.795728	K-Wm
439	1024	73.4332	125.899	7073.29	1.71447	341.993	0.583271	6	156.437	1029.06	77.4148	94.9239	1.14739	0.759586	K-Wm
440	1025	186.923	332.884	36193.8	1.78086	904.263	0.561527	6	170.938	1293.37	75.4406	214.725	1.34117	0.555949	K-Wm
443	1029	253.798	424.24	51445.6	1.67157	1291.12	0.598241	6	244.068	1838.39	78.5679	255.999	1.60619	0.38762	K-Wm
445	1032	160.066	271.231	31555.8	1.69449	734.232	0.590147	6	138.796	1127.63	96.3402	200.495	1.16627	0.735193	K-Wm
447	1034	108.074	122.112	8116.48	1.12989	408.848	0.885039	6	77.2869	290.039	96.3402	101.683	1.28051	0.609866	K-Wm
448	1035	68.9268	169.51	8854.74	2.45927	411.39	0.406624	6	77.7675	316.421	90	106.207	1.23359	0.65714	K-Wm
449	1036	102.25	157.007	9514.09	1.53551	433.631	0.651247	6	81.9718	339.982	39.9015	110.09	1.25442	0.635501	K-Wm
450	1037	120.656	138.819	11651.3	1.15053	442.876	0.869162	6	83.7196	416.355	141.274	121.83	1.15771	0.746104	K-Wm
451	1038	105.109	116.955	8662.45	1.1127	380.135	0.898715	6	71.8592	309.549	158.199	105.047	1.15245	0.752929	K-Wm
452	1040	94.056	312.427	21492	3.32171	744.087	0.301049	6	140.659	768.006	102.73	165.464	1.43216	0.487549	K-Wm
453	1041	125.385	189.261	13415.7	1.50943	541.689	0.6625	6	102.399	479.404	153.435	130.729	1.31962	0.574252	K-Wm
454	1042	166.461	261.645	32656.2	1.5718	747.891	0.636212	6	141.378	1166.95	76.0506	203.961	1.16778	0.733294	K-Wm
455	1043	101.346	160.847	10796.8	1.58711	445.145	0.630078	6	84.1484	385.817	142.595	117.277	1.20882	0.684352	K-Wm
456	1044	182.818	608.499	63053.3	3.32843	1605.05	0.300442	6	303.413	2253.18	94.1243	283.413	1.8036	0.30741	K-Wm
458	1046	79.3907	105.882	5892.68	1.33368	305.047	0.749807	6	57.6648	210.573	89.8521	86.6407	1.12128	0.795373	K-Wm
459	1047	67.0007	179.154	7792.76	2.67391	428.282	0.373984	6	80.9606	278.471	104.614	99.6347	1.36895	0.533608	K-Wm
461	1049	122.265	199.679	17592.2	1.63317	576.696	0.612306	6	109.016	628.651	47.9321	149.701	1.22685	0.66438	K-Wm
462	1050	69.693	151.38	7186.57	2.1721	365.032	0.460383	6	69.0041	256.809	85.2362	95.6811	1.215	0.677408	K-Wm
464	1052	66.0507	173.026	8119.07	2.6196	407.339	0.381737	6	77.0017	290.132	80.7778	101.699	1.27558	0.614588	K-Wm
467	1058	97.2321	265.249	17433.3	2.728	656.778	0.366569	6	193.303	1120.28	107.103	149.024	1.40357	0.507612	K-Wm
468	1059	103.399	164.555	9431.71	1.59145	477.929	0.628356	6	90.3458	337.038	46.1214	109.613	1.38859	0.518624	K-Wm
470	1061	145.774	387.657	39948.6	2.6593	947.05	0.376038	6	179.027	1427.55	94.3994	225.588	1.33699	0.559429	K-Wm
471	1062	160.754	382.072	33873.3	2.37675	973.689	0.420743	6	184.062	1210.45	115.061	207.727	1.49278	0.448752	K-Wm
472	1064	71.0859	137.199	6550.54	1.93005	366.271	0.518122	6	69.2383	234.081	108.49	91.349	1.27694	0.613285	K-Wm
474	1066	305.038	396.438	72434	1.29963	1374.23	0.769447	6	259.779	2588.4	135.97	303.764	1.44076	0.481741	K-Wm
475	1067	86.4711	189.088	9720.97	2.18672	484.911	0.457306	6	91.6655	347.375	81.2538	111.281	1.38775	0.519249	K-Wm
476	1068	119.888	180.382	16279.2	1.50458	508.676	0.664637	6	96.158	581.732	88.0732	144.007	1.12494	0.790208	K-Wm
477	1069	134.232	192.69	14161.2	1.43551	553.416	0.696619	6	104.615	506.045	49.3493	134.312	1.31222	0.580747	K-Wm
479	1071	109.938	146.673	10257.7	1.33414	442.529	0.749546	6	83.6538	366.554	62.5073	114.311	1.23288	0.657894	K-Wm
480	1073	155.769	282.116	28186.8	1.81112	798.809	0.552144	6	151.004	1007.24	97.8485	189.491	1.34253	0.554817	K-Wm
481	1074	79.2538	167.766	9242.15	2.11682	418.297	0.472407	6	79.0732	330.264	83.4032	108.505	1.22773	0.663426	K-Wm
482	1075	100.734	131.462	7619.43	1.30503	377.59	0.766263	6	71.3781	272.277	8.49169	98.5204	1.22058	0.671229	K-Wm
483	1076	247.509	288.717	33455.4	1.16649	1069.17	0.857272	6	202.111	1195.52	104.089	206.442	1.64937	0.36759	K-Wm
484	1077	145.471	223.757	20086.3	1.53815	651.207	0.65013	6	123.101	717.775	86.8886	159.961	1.29651	0.59491	K-Wm
485	1081	115.125	141.411	10674.8	1.22833	443.499	0.814117	6	83.8372	381.458	40.3282	116.612	1.21121	0.681653	K-Wm
486	1082	102.486	198.3	13669.4	1.9349	524.9	0.516822	6	99.225	488.469	98.1424	131.959	1.2668	0.623139	K-Wm
487	1083	270.791	303.464	47213	1.12066	1110.37	0.892335	6	209.9	1687.14	71.5651	245.243	1.44193	0.480965	K-Wm
488	1084	71.6234	130.535	7346.97	1.82252	333.278	0.548692	6	63.0015	262.541	71.4349	96.7429	1.09713	0.830777	K-Wm
489	1085	170.259	294.828	25034.3	1.73164	792.836	0.577486	6	149.875	894.591	97.2242	178.58	1.41391	0.500217	K-Wm
490	1086	63.0392	148.71	6855.49	2.359	361.792	0.423908	6	68.3917	244.978	88.7122	93.4511	1.23295	0.657824	K-Wm
491	1087	207.295	646.828	76870	3.12032	1632.51	0.32048	6	308.604	2746.92	65.1433	312.927	1.66143	0.362271	K-Wm
492	1088	85.6295	210.196	12226.9	2.45471	565.166	0.40738	6	106.837	436.923	92.2906	124.802	1.44219	0.480787	K-Wm
493	1090	148.676	355.401	38265.3	2.39044	905.464	0.418333	6	171.165	1367.4	120.075	220.784	1.30609	0.586209	K-Wm
494	1091	84.8145	100.34	5744.69	1.18306	300.897	0.845267	6	56.8804	205.284	179.549	85.5458	1.12019	0.796928	K-Wm
495	1092	76.3195	143.806	8583.73	1.88427	384.306	0.530711	6	72.6476	306.736	100.971	104.569	1.17043	0.729982	K-Wm
496	1093	104.508	198.974	13815.9	1.90391	512.524	0.525234	6	96.8855	493.706	75.2919	132.665	1.23035	0.660603	K-Wm
497	1094	131.04	250.035	20064.5	1.90808	678.151	0.524086	6	128.195	716.998	97.7575	159.875	1.35088	0.547981	K-Wm
498	1095	150.406	208.231	15902	1.38446	643.907	0.722305	6	121.722	568.251	88.8043	142.328	1.4408	0.48172	K-Wm
499	1096	79.8742	165.924	9708.98	2.07732	417.22	0.48139	6	78.8696	346.946	71.9883	111.212	1.19477	0.700539	K-Wm
501	1098	220.093	318.563	41015.6	1.4474	996.178	0.690894	6	188.313	1465.68	74.9277	228.581	1.38793	0.519117	K-Wm
502	1103	148.785	247.066	21636.8	1.66055	656.1	0.60221	6	124.026	773.182	30.9638	166.021	1.25857	0.631311	K-Wm
503	1104	83.7995	195.66	11034.6	2.33486	465.609	0.428291	6	88.0167	394.318	88.4702	118.562	1.25068	0.639301	K-Wm
504	1105	110.166	215.825	12987.2	1.9591	573.325	0.51044	6	108.379	464.093	54.9296	128.624	1.41954	0.496254	K-Wm
505	1106	124.128	241.373	20796.1	1.94455	625.94	0.514257	6	118.325	743.139	70.0596	162.763	1.22475	0.666662	K-Wm
506	1107	237.125	478.325	54055.5	2.01718	1258.15	0.495741	6	237.835	1931.65	84.6691	262.413	1.52692	0.428912	K-Wm
507	1108	95.4479	168.621	13075.3	1.76662	470.735	0.566052	6	88.9857	467.239	54.9608	129.06	1.1616	0.741119	K-Wm
508	1112	69.9656	162.901	8607.12	2.32831	423.93	0.429497	6	80.1379	307.572	87.5732	104.711	1.28935	0.601533	K-Wm
509	1113	62.3573	137.714	6143.68	2.20847	344.081	0.452801	6	65.0437	219.542	76.0868	88.4667	1.23866	0.651773	K-Wm
510	1114	84.9797	218.451	12840.1	2.57063	566.142	0.38901	6	107.021	458.835	79.488	127.894	1.40977	0.50316	K-Wm
511	1115	89.8201	213.71	12733	2.37931	531.358	0.42029	6	100.446	455.007	97.7652	127.359	1.3287	0.566428	K-Wm
515	1119	167.223	269.017	33823.2	1.60874	777.216	0.621606	6	146.922	1208.66	104.771	207.574	1.19245	0.703267	K-Wm
516	1120	197.618	282.58	37210.2	1.42993	984.151	0.699334	6	186.04	1329.69	142.782	217.719	1.43958	0.482535	K-Wm
520	1126	78.748	130.412	8149.69	1.65607	369.714	0.60384	6	69.8892	291.226	90	101.891	1.15558	0.748858	K-Wm
521	1127	130.68	250.517	18217.5	1.91702	689.867	0.521642	6	130.41	650.995	68.1675	152.339	1.4422	0.480782	K-Wm
522	1128	115.107	142.299	9724.27	1.23624	431.519	0.808905	6	81.5727	347.493	174.806	111.3	1.23474	0.655912	K-Wm
523	1129	278.295	444.717	57879.3	1.59801	1307.75	0.625779	6	247.211	2068.29	99.4623	271.536	1.5338	0.425074	K-Wm
524	1130	85.6039	178.912	10559.8	2.08999	462.137	0.47847	6	87.3605	377.349	68.5394	115.982	1.26896	0.621015	K-Wm
527	1133	159.759	247.128	24539	1.54689	727.958	0.64646	6	137.61	876.891	49.1698	176.805	1.31124	0.581613	K-Wm
528	1135	157.804	314.169	30575.6	1.99088	853.509	0.502291	6	161.344	1092.61	138.013	197.357	1.37729	0.527167	K-Wm
529	1136	91.218	142.403	7947.93	1.56113	382.073	0.64056	6	72.2255	284.016	113.056	100.622	1.20927	0.683834	K-Wm
530	1137	113.987	200.049	14248.1	1.75501	526.885	0.569796	6	99.6001	509.15	115.335	134.724	1.24549	0.644638	K-Wm
531	1138	122.264	230.747	16541.9	1.88729	684.48	0.529861	6	129.391	591.118	160.201	145.164	1.50167	0.443459	K-Wm
532	1139	102.845	148.851	8655.52	1.44733	425.19	0.690926	6	80.3763	309.301	73.2717	105.005	1.28956	0.601334	K-Wm
533	1140	79.376	121.822	6838.67	1.53474	342.559	0.651575	6	64.756	244.377	89.9945	93.3364	1.16884	0.731965	K-Wm
534	1141	235.204	359.677	51759.6	1.52922	1109.91	0.65393	6	209.813	1849.61	137.49	256.78	1.37657	0.527721	K-Wm
536	1146	91.0083	213.215	14076.8	2.34281	546.904	0.426837	6	103.384	503.027	87.7581	133.911	1.30066	0.591114	K-Wm
537	1147	150.355	301.416	26964.1	2.0047	783.803	0.498829	6	148.167	963.552	103.852	185.335	1.34685	0.551267	K-Wm
538	1148	86.5555	125.795	7142	1.45334	364.459	0.688071	6	68.8959	255.216	142.809	95.3839	1.21687	0.675323	K-Wm
542	1152	120.907	231.315	16450.6	1.91317	585.424	0.522694	6	110.666	587.856	96.4196	144.763	1.28791	0.60288	K-Wm
546	1156	174.94	322.257	29638	1.84211	884.693	0.542857	6	167.239	1059.1	90	194.308	1.45002	0.475612	K-Wm
547	1158	114.694	149.496	11049.4	1.30343	460.508	0.767209	6	87.0525	394.847	100.502	118.641	1.23615	0.654418	K-Wm
548	1159	70.9728	178.357	7912.44	2.51303	423.684	0.397926	6	80.0915	282.748	116.565	100.397	1.34398	0.553625	K-Wm
549	1160	96.1503	168.128	10850.6	1.7486	443.01	0.571886	6	83.7448	387.74	74.2342	117.569	1.20003	0.694408	K-Wm
552	1163	95.4617	313.055	21518.6	3.27938	753.637	0.304936	6	142.464	768.959	75.9638	165.567	1.44964	0.475861	K-Wm
554	1165	81.3005	128.56	7118.08	1.5813	358.222	0.632392	6	67.7169	254.362	121.055	95.224	1.19805	0.696702	K-Wm
556	1168	67.7828	141.967	7245.64	2.09444	357.925	0.477456	6	67.6607	258.92	85.1058	96.0735	1.18648	0.710366	K-Wm
557	1169	84.2167	111.574	6613.31	1.32484	326.347	0.754807	6	61.6913	236.324	59.6224	91.7856	1.13234	0.779918	K-Wm
558	1170	129.376	268.231	17012	2.07327	694.636	0.48233	6	131.311	607.918	94.3802	147.212	1.50274	0.442824	K-Wm
559	1171	134.258	180.919	16762.7	1.34755	538.208	0.742088	6	101.741	599.006	4.84043	146.129	1.17296	0.726828	K-Wm
560	1172	80.3784	146.852	7946.05	1.82701	388.385	0.547343	6	73.4188	283.949	87.9897	100.61	1.2294	0.661629	K-Wm
562	1174	68.2389	151.647	7597.03	2.22229	378.237	0.449986	6	71.5004	271.477	97.125	98.3756	1.22447	0.666969	K-Wm
563	1175	232.395	641.863	86169.6	2.76195	1638.77	0.362063	6	309.787	3079.23	115.489	331.316	1.57524	0.403001	K-Wm
564	1177	121.67	255.766	17431.7	2.10213	652.537	0.475708	6	123.353	622.914	90	149.017	1.39457	0.514184	K-Wm
565	1178	173.216	220.419	21931.9	1.27251	673.637	0.78585	6	127.342	783.729	109.338	167.149	1.28349	0.607036	K-Wm
566	1179	109.584	212.212	16563.5	1.93653	587.587	0.516388	6	111.075	591.891	97.8053	145.259	1.28825	0.602558	K-Wm
567	1180	179.679	457.904	40678.3	2.54846	1212.02	0.392394	6	229.116	1453.62	57.7712	227.639	1.69565	0.3478	K-Wm
568	1181	127.658	241.815	22106.9	1.89423	654.665	0.527918	6	123.755	789.982	120.798	167.815	1.24239	0.647859	K-Wm
570	1183	86.1917	180.556	9337.35	2.09482	449.938	0.477368	6	85.0544	333.666	84.6509	109.063	1.31385	0.579306	K-Wm
571	1188	78.1737	106.432	5719.5	1.36148	311.89	0.734493	6	58.9584	204.384	102.995	85.358	1.16366	0.738491	K-Wm
572	1189	171.932	283.737	33511.4	1.65029	836.106	0.605955	6	158.054	1197.51	105.837	206.615	1.28876	0.602086	K-Wm
574	1191	173.429	328.603	35400.6	1.89474	859.07	0.527778	6	162.395	1265.03	92.6026	212.359	1.28833	0.602481	K-Wm
575	1192	131.959	199.173	17633.5	1.50935	632.169	0.662536	6	119.503	630.126	165.379	149.877	1.34329	0.554194	K-Wm
576	1193	92.4077	232.869	14668.2	2.52002	573.454	0.396823	6	108.403	524.163	85.3411	136.695	1.33603	0.560235	K-Wm
577	1194	99.4392	401.802	23473.2	4.04068	908.777	0.247483	6	171.791	838.806	95.7487	172.922	1.67369	0.356983	K-Wm
578	1195	86.5292	118.797	6951.28	1.37292	325.819	0.728376	6	61.5916	248.401	175.73	94.1017	1.10268	0.822433	K-Wm
579	1196	128.653	178.322	17702.7	1.38607	539.806	0.721464	6	102.043	632.6	85.4693	150.171	1.14478	0.763053	K-Wm
580	1199	51.4622	154.803	5586.29	3.00809	354.361	0.332436	6	66.9869	199.624	80.5598	84.3581	1.33779	0.558756	K-Wm
581	1200	103.885	163.819	10927.4	1.57693	464.109	0.634145	6	312.608	3489.53	118.637	117.984	1.25276	0.637185	K-Wm
582	1201	157.5	406.615	37285.6	2.58167	1031.03	0.387346	6	194.902	1332.38	97.5715	217.939	1.50663	0.44054	K-Wm
584	1207	78.5247	147.627	7829.12	1.88	384.225	0.531914	6	72.6323	279.77	104.329	99.8669	1.22528	0.666087	K-Wm
585	1208	75.0088	169.178	8786.76	2.25543	404.362	0.443373	6	76.4389	313.991	70.96	105.798	1.2172	0.67496	K-Wm
587	1210	87.8476	116.338	7620.8	1.32432	366.972	0.755107	6	69.3708	272.326	90.5895	98.5293	1.18614	0.710764	K-Wm
588	1214	463.076	1471.91	294941	3.17854	4266.19	0.31461	6	806.464	10539.6	88.3374	612.961	2.21655	0.203537	K-Wm
590	1217	155.542	213.724	21201.1	1.37406	623.584	0.727773	6	117.88	757.613	126.839	164.34	1.20843	0.68479	K-Wm
591	1218	87.1171	92.5385	5816.49	1.06223	292.901	0.941415	6	55.3688	207.85	70.2988	86.0787	1.08367	0.851548	K-Wm
592	1219	87.1878	168.782	9688.37	1.93585	440.069	0.51657	6	83.1888	346.21	59.6335	111.094	1.26154	0.628346	K-Wm
593	1220	161.7	245.401	21530.9	1.51763	746.841	0.658922	6	141.18	769.399	97.4314	165.614	1.43616	0.484838	K-Wm
594	1221	140.184	271.03	19987.6	1.9334	764.523	0.517225	6	144.522	714.25	92.4804	159.568	1.52586	0.429507	K-Wm
595	1223	173.13	240.89	24534.8	1.39138	729.473	0.71871	6	137.897	876.741	71.5651	176.79	1.31408	0.579101	K-Wm
596	1224	115.48	215.144	14957.8	1.86305	564.74	0.536755	6	106.756	534.512	130.68	138.038	1.30292	0.589063	K-Wm
597	1225	91.7244	130.652	8111.2	1.4244	366.138	0.702051	6	69.2132	289.85	57.9946	101.65	1.14712	0.759952	K-Wm
598	1226	48.8868	176.213	6781.52	3.60452	411.052	0.27743	6	77.7036	242.335	87.1131	92.9456	1.40844	0.504108	K-Wm
602	1230	107.288	287.208	20283.8	2.67697	692.805	0.373557	6	130.965	724.833	81.4692	160.746	1.37259	0.530783	K-Wm
604	1235	103.544	132.889	8134.97	1.2834	397.402	0.779178	6	75.1233	290.7	125.39	101.799	1.24325	0.64697	K-Wm
606	1237	97.4777	167.064	9956.8	1.71387	428.659	0.583473	6	81.0319	355.802	99.3031	112.622	1.21215	0.680591	K-Wm
607	1238	187.989	294.708	34958.9	1.56769	849.72	0.637882	6	160.628	1249.24	83.72	211.03	1.28234	0.60813	K-Wm
609	1240	60.0622	220.593	10434.2	3.67274	534.771	0.272277	6	101.091	372.86	84.4606	115.291	1.47722	0.458259	K-Wm
610	1241	103.491	200.395	13886.7	1.93635	517.093	0.516434	6	97.7492	496.236	80.5377	133.004	1.23815	0.652306	K-Wm
611	1242	63.6788	110.116	5715.76	1.72925	295.569	0.578286	6	55.8732	204.25	0	85.3301	1.10313	0.821761	K-Wm
612	1243	384.877	671.535	130692	1.7448	2344.71	0.573131	6	443.235	4670.21	128.673	408.027	1.83008	0.298578	K-Wm
613	1246	83.8657	134.187	7089.59	1.60003	366.725	0.624989	6	69.3242	253.343	143.421	95.0333	1.22895	0.66211	K-Wm
615	1248	99.4799	200.011	13577.5	2.01057	506.761	0.497372	6	95.7961	485.188	103.825	131.515	1.22715	0.664055	K-Wm
616	1249	93.8196	117.454	7482.48	1.25191	358.949	0.798777	6	67.8542	267.383	150.544	97.631	1.17089	0.729407	K-Wm
617	1250	75.9515	150.599	7047.06	1.98283	369.57	0.504329	6	69.862	251.824	94.5689	94.7478	1.24222	0.648043	K-Wm
620	1253	103.629	129.951	9647.41	1.25401	395.518	0.79744	6	74.7671	344.746	15.4291	110.859	1.13623	0.774582	K-Wm
622	1255	71.6383	139.851	7198.02	1.95218	377.402	0.512247	6	71.3425	257.218	130.273	95.7573	1.25517	0.634738	K-Wm
624	1257	184.413	405.277	38495.9	2.19766	1112.32	0.455029	6	210.268	1375.63	82.5442	221.448	1.59966	0.390793	K-Wm
625	1259	135.227	297.104	25254.2	2.19708	838.804	0.455151	6	158.564	902.449	150.176	179.363	1.48936	0.450819	K-Wm
627	1261	150.019	276.23	29629.8	1.8413	781.406	0.543096	6	147.714	1058.81	86.1859	194.281	1.28091	0.609489	K-Wm
628	1262	121.785	174.667	12876.2	1.43422	516.373	0.697241	6	97.6131	460.127	90	128.074	1.28403	0.606529	K-Wm
629	1263	126.082	231.54	14151.3	1.83643	626.15	0.544535	6	118.365	505.69	102.304	134.265	1.4852	0.453345	K-Wm
633	1267	137.918	238.884	19098.4	1.73208	621.001	0.577342	6	117.391	682.473	85.9839	155.978	1.26794	0.622016	K-Wm
634	1268	84.6685	139.847	8844.86	1.6517	377.14	0.605437	6	71.2929	316.067	82.2763	106.148	1.13152	0.781045	K-Wm
635	1269	109.972	131.289	9679.46	1.19384	391.288	0.837631	6	73.9675	345.892	109.613	111.043	1.12221	0.794051	K-Wm
638	1272	151.12	344.521	21107.5	2.27979	946.464	0.438637	6	178.916	754.268	56.3099	163.977	1.83819	0.29595	K-Wm
640	1276	108.204	237.539	14546.2	2.19529	695.408	0.455521	6	131.457	519.804	83.7252	136.126	1.62693	0.377799	K-Wm
641	1277	148.273	185.361	20689.9	1.25013	605.366	0.799915	6	114.436	739.346	89.9746	162.347	1.18753	0.709109	K-Wm
642	1278	173.272	220.259	24589.4	1.27117	693.794	0.786674	6	131.152	878.692	78.9961	176.986	1.24842	0.641619	K-Wm
643	1279	128.114	254.128	23356.2	1.9836	662.393	0.504135	6	125.216	834.622	70.5366	172.491	1.22298	0.668588	K-Wm
645	1281	175.066	399.826	37909.4	2.28386	993.16	0.437856	6	187.743	1354.68	63.4349	219.755	1.4393	0.482723	K-Wm
646	1283	86.4737	186.11	10160.4	2.15221	461.148	0.464639	6	87.1736	363.079	170.538	113.768	1.29089	0.600097	K-Wm
647	1284	91.9574	116.028	7912.97	1.26176	353.217	0.792545	6	66.7707	282.767	175.543	100.4	1.12041	0.796612	K-Wm
648	1285	123.072	208.443	15933.1	1.69367	573.259	0.590435	6	108.367	569.363	102.702	142.467	1.28146	0.60896	K-Wm
650	1287	86.9738	138.562	7937.85	1.59314	366.839	0.627691	6	69.3458	283.656	59.3487	100.558	1.1618	0.740867	K-Wm
651	1288	89.7999	158.292	8413.97	1.76272	413.537	0.567305	6	78.1734	300.67	50.1944	103.53	1.27209	0.617962	K-Wm
652	1289	54.1811	173.747	6412.35	3.20678	419.846	0.31184	6	79.3659	229.143	96.8428	90.3803	1.4794	0.456907	K-Wm
655	1292	122.843	156.928	13665.6	1.27747	479.711	0.782798	6	90.6825	488.334	56.0316	131.941	1.1579	0.745864	K-Wm
657	1294	77.3748	156.858	7819.98	2.02725	383.755	0.493278	6	72.5435	279.444	106.136	99.8086	1.22449	0.66694	K-Wm
659	1296	233.87	491.671	56804.2	2.10233	1346.03	0.475662	6	254.449	2029.87	123.412	269.002	1.59357	0.393784	K-Wm
661	1298	118.388	159.3	10106.1	1.34557	499.747	0.743177	6	94.4701	361.138	93.2415	113.464	1.40269	0.508246	K-Wm
662	1299	207.639	275.518	37991.2	1.32691	932.049	0.753632	6	176.191	1357.6	65.539	219.992	1.34928	0.549281	K-Wm
664	1304	120.486	193.102	13394	1.60269	528.748	0.62395	6	99.9523	478.63	125.556	130.623	1.28913	0.601734	K-Wm
665	1305	102.384	121.941	9877.67	1.19101	400.529	0.839621	6	75.7144	352.974	22.8337	112.174	1.13714	0.773349	K-Wm
666	1306	95.5811	164.111	9782.32	1.71698	455.135	0.582416	6	86.0368	349.567	89.9002	111.631	1.29845	0.593133	K-Wm
667	1307	147.691	351.684	39305.8	2.38122	868.902	0.419953	6	164.254	1404.58	73.8196	223.766	1.23665	0.65389	K-Wm
668	1308	94.0931	181.248	11294.6	1.92626	476.202	0.519141	6	204.403	926.269	71.5651	119.95	1.26433	0.625572	K-Wm
672	1312	103.259	257.735	17869.4	2.49599	642.799	0.400642	6	121.512	638.557	100.707	150.876	1.35683	0.543188	K-Wm
674	1314	168.257	386.291	38782	2.29584	1140.87	0.43557	6	215.665	1385.86	95.7231	222.27	1.63465	0.374239	K-Wm
675	1316	212.708	304.998	39854.3	1.43388	911.056	0.69741	6	172.222	1424.18	30.807	225.322	1.28769	0.603081	K-Wm
678	1322	134.312	207.028	16914.2	1.5414	581.884	0.648761	6	109.997	604.423	165.505	146.788	1.26245	0.627435	K-Wm
680	1324	135.412	193.758	17393.8	1.43088	572.296	0.698873	6	108.185	621.561	171.859	148.855	1.22441	0.667027	K-Wm
685	1332	134.977	160.637	15155.4	1.19011	513.941	0.84026	6	97.1533	541.572	172.539	138.947	1.17797	0.720661	K-Wm
686	1333	121.718	189.921	12606.7	1.56033	559.23	0.640888	6	105.715	450.495	103.241	126.726	1.40538	0.506302	K-Wm
687	1334	148.306	253.791	19075	1.71127	810.745	0.584362	6	153.26	681.636	132.719	155.882	1.65637	0.36449	K-Wm
688	1335	98.0404	156.822	9994.71	1.59956	425.507	0.62517	6	80.4361	357.157	136.484	112.837	1.20095	0.693341	K-Wm
690	1337	176.908	287.571	31591.7	1.62554	808.888	0.615179	6	152.909	1128.92	103.976	200.61	1.28412	0.606437	K-Wm
691	1344	79.0215	217.342	10027.4	2.75042	514.544	0.363581	6	97.2674	358.326	110.431	113.021	1.44988	0.475701	K-Wm
692	1345	185.674	247.991	27836.5	1.33563	760.058	0.748712	6	143.678	994.724	139.399	188.31	1.28542	0.605217	K-Wm
693	1346	128.857	259.737	20877.1	2.0157	713.733	0.496105	6	134.921	746.036	97.9858	163.08	1.39382	0.514742	K-Wm
695	1349	75.6312	97.7312	5619.05	1.29221	308.321	0.773869	6	58.2838	200.794	102.852	84.6051	1.16059	0.742412	K-Wm
697	1351	84.3266	153.361	7756.79	1.81865	402.658	0.549858	6	76.1168	277.186	53.368	99.4045	1.29003	0.600896	K-Wm
698	1352	85.139	241.853	12202.8	2.84068	589.142	0.352028	6	111.369	436.061	105.709	124.679	1.50486	0.441578	K-Wm
703	1361	165.067	205.956	17227.1	1.24771	745.266	0.801465	6	140.882	615.603	71.8908	148.14	1.60218	0.389564	K-Wm
704	1362	136.435	253.975	23063.2	1.8615	686.526	0.5372	6	129.778	824.155	104.95	171.406	1.27556	0.614605	K-Wm
708	1366	89.93	103.098	6948.38	1.14642	336.591	0.87228	6	63.6277	248.297	0	94.0821	1.13937	0.770316	K-Wm
710	1372	175.918	370.214	34445.2	2.10447	949.602	0.475178	6	179.509	1230.88	115.62	209.474	1.44372	0.479772	K-Wm
711	1373	125.808	197.443	15374	1.56939	535.067	0.637189	6	101.147	549.384	77.1056	139.945	1.21764	0.674467	K-Wm
712	1374	127.133	137.894	13421.6	1.08464	449.229	0.921963	6	84.9203	479.614	13.2654	130.758	1.09413	0.83533	K-Wm
714	1376	195.782	267.057	25392.8	1.36405	916.202	0.733111	6	173.195	907.401	177.126	179.854	1.62234	0.379942	K-Wm
716	1378	260.783	389.075	59481.4	1.49195	1412.54	0.670264	6	267.021	2125.54	7.59657	275.268	1.63424	0.374429	K-Wm
718	1381	99.1923	205.326	11204.7	2.06998	556.495	0.483097	6	105.198	400.396	84.0744	119.472	1.48343	0.454431	K-Wm
720	1383	138.893	219.142	20946.3	1.57777	608.058	0.633804	6	114.945	748.508	97.0084	163.35	1.18549	0.711554	K-Wm
721	1384	94.7518	203.37	12920	2.14634	512.249	0.465909	6	96.8336	461.69	83.1572	128.291	1.27162	0.618426	K-Wm
722	1385	94.2368	204.317	11601.1	2.16812	517.845	0.461229	6	97.8914	414.559	76.5043	121.567	1.35661	0.543359	K-Wm
723	1386	116.861	164.229	13500.5	1.40534	479.832	0.711574	6	90.7055	482.435	75.8813	131.142	1.16525	0.73648	K-Wm
724	1388	94.6272	170.39	13456.1	1.80065	461.448	0.555355	6	87.2302	480.847	91.4011	130.925	1.12245	0.793711	K-Wm
725	1389	83.3932	181.989	10636.3	2.1823	483.2	0.458231	6	91.3422	380.084	86.7154	116.402	1.32202	0.572171	K-Wm
726	1390	94.6307	130.767	8672.79	1.38187	369.657	0.723657	6	69.8784	309.919	65.3781	105.11	1.12002	0.797171	K-Wm
729	1395	225.052	328.685	33226.2	1.46049	1066.77	0.684703	6	201.659	1187.33	110.726	205.734	1.65134	0.366713	K-Wm
730	1396	155.941	245.905	20730.7	1.57691	824.468	0.634153	6	155.854	740.801	116.83	162.507	1.61574	0.38305	K-Wm
731	1397	248.031	380.52	47697.6	1.53416	1174.1	0.651822	6	221.947	1704.45	67.8302	246.498	1.51692	0.434586	K-Wm
732	1398	105.713	149.576	10281.8	1.41493	435.945	0.706751	6	82.4092	367.416	90.0044	114.446	1.21312	0.67951	K-Wm
734	1401	134.555	269.674	17925.8	2.0042	736.567	0.498952	6	139.238	640.57	71.8193	151.114	1.55231	0.414995	K-Wm
735	1402	84.7751	156.388	10182.4	1.84474	402.73	0.542081	6	76.1305	363.864	84.1426	113.891	1.12614	0.788518	K-Wm
740	1410	91.8233	117.462	7140.36	1.27922	342.88	0.781727	6	64.8167	255.158	82.4054	95.3729	1.14495	0.762824	K-Wm
741	1411	73.0897	123.937	6162.3	1.69568	331.746	0.589733	6	62.7119	220.207	60.1052	88.6006	1.19245	0.703268	K-Wm
742	1412	157.944	330.85	25656.3	2.09473	826.203	0.477388	6	156.182	916.815	119.222	180.785	1.45544	0.472073	K-Wm
743	1413	134.986	349.568	25709.7	2.58967	864.771	0.38615	6	163.473	918.724	103.769	180.973	1.5218	0.431801	K-Wm
745	1421	145.961	231.622	20045.1	1.58688	734.55	0.630169	6	138.856	716.302	74.232	159.797	1.46394	0.466611	K-Wm
746	1422	77.1255	125.153	6309.66	1.62272	327.837	0.616251	6	61.973	225.473	117.172	89.6537	1.16456	0.737359	K-Wm
747	1423	160.738	202.87	21524.7	1.26212	633.914	0.792318	6	119.833	769.177	25.01	165.59	1.21918	0.672769	K-Wm
751	1428	127.931	298.115	24759.4	2.33028	756.762	0.429132	6	143.055	884.766	117.868	177.597	1.35705	0.543013	K-Wm
753	1430	123.854	172.198	14066.9	1.39033	482.478	0.719252	6	91.2056	502.673	53.3738	133.864	1.14785	0.758984	K-Wm
754	1431	123.263	194.096	14457.3	1.57466	568.124	0.635059	6	107.396	516.626	96.3402	135.709	1.33323	0.562589	K-Wm
755	1433	138.889	169.806	18013.4	1.22261	529.336	0.817925	6	100.064	643.701	96.5388	151.483	1.11286	0.807463	K-Wm
756	1434	122.423	191.147	15301.3	1.56136	546.538	0.640466	6	103.315	546.784	76.018	139.614	1.2467	0.643392	K-Wm
757	1435	92.9351	186.328	11092.8	2.00493	516.179	0.498771	6	97.5765	396.396	124.562	118.874	1.38288	0.522912	K-Wm
760	1438	177.378	232.546	24115.4	1.31102	800.656	0.762764	6	151.353	861.754	71.4608	175.272	1.4548	0.472489	K-Wm
763	1441	211.73	615.397	70394.5	2.90652	1708.55	0.344054	6	322.978	2515.52	89.2267	299.457	1.81704	0.302881	K-Wm
766	1445	83.877	148.372	8764.54	1.76892	393.65	0.565317	6	74.414	313.197	69.7595	105.665	1.18645	0.710392	K-Wm
767	1446	139.088	164.244	12992.9	1.18087	515.613	0.846835	6	97.4694	464.297	84.4462	128.653	1.27637	0.613832	K-Wm
768	1447	251.801	503.534	54271.3	1.99973	1449.86	0.500068	6	274.075	1939.36	90.7485	262.936	1.75608	0.324272	K-Wm
771	1450	90.8597	148.657	9766.68	1.63612	414.511	0.611203	6	78.3576	349.008	12.8043	111.542	1.1835	0.713943	K-Wm
773	1452	127.606	324.796	27627.6	2.54531	840.398	0.392879	6	158.865	987.259	92.2784	187.602	1.42666	0.491317	K-Wm
774	1453	178.35	550.475	53683.6	3.08649	1395.14	0.323993	6	263.732	1918.36	114.121	261.509	1.69904	0.346414	K-Wm
780	1460	211.354	264.375	34515.1	1.25086	888.203	0.79945	6	167.902	1233.38	79.4984	209.686	1.349	0.549509	K-Wm
781	1461	102.259	276.635	16517.7	2.70523	708.064	0.369655	6	133.849	590.254	75.1355	145.058	1.55454	0.413804	K-Wm
783	1466	192.135	453.113	51830.4	2.35831	1142.66	0.424032	6	216.004	1852.14	73.3841	256.955	1.41622	0.498584	K-Wm
784	1467	144.508	381.507	32673	2.64003	984.162	0.378783	6	186.042	1167.56	71.7816	204.014	1.5363	0.423687	K-Wm
786	1469	90.1217	139.851	10315.3	1.55181	389.88	0.64441	6	73.7013	368.613	83.4338	114.632	1.08317	0.852335	K-Wm
788	1471	185.44	375.038	38943.9	2.02242	1016.68	0.494457	6	192.189	1391.65	70.3047	222.733	1.45368	0.473217	K-Wm
791	1475	184.51	439.7	33419.4	2.38307	1268.12	0.419627	6	239.72	1194.23	53.2765	206.331	1.95734	0.261017	K-Wm
795	1481	79.7647	106.169	5943.03	1.33103	304.943	0.751296	6	57.6452	212.372	179.806	87.01	1.11614	0.802712	K-Wm
796	1482	118.919	197.184	15304.3	1.65814	515.212	0.603087	6	97.3936	546.891	106.26	139.628	1.17513	0.724151	K-Wm
797	1483	92.9546	142.473	7604.77	1.53272	413.119	0.652437	6	78.0943	271.753	125.474	98.4257	1.33671	0.559663	K-Wm
798	1484	137.821	194.679	17206.5	1.41254	557.376	0.707943	6	105.364	614.865	75.2502	148.051	1.19897	0.69564	K-Wm
800	1486	73.9137	143.542	7447.72	1.94202	354.512	0.514928	6	67.0155	266.141	86.4237	97.404	1.15911	0.744306	K-Wm
801	1487	151.624	201.044	22002.3	1.32594	614.592	0.754183	6	116.18	786.245	92.7263	167.417	1.16912	0.731618	K-Wm
803	1495	80.7553	247.433	15150.6	3.06398	577.708	0.326372	6	109.208	541.399	96.0122	138.925	1.32434	0.570166	K-Wm
805	1497	70.9891	195.706	9843.5	2.75685	472.969	0.362733	6	89.4081	351.753	91.973	111.98	1.34513	0.552681	K-Wm
806	1498	125.303	176.318	15498.8	1.40714	501.153	0.710663	6	94.7359	553.842	92.8624	140.512	1.13586	0.77508	K-Wm
807	1499	94.6175	180.962	10261	1.91257	464.282	0.522857	6	87.766	366.671	97.4314	114.33	1.29328	0.597879	K-Wm
809	1503	71.3646	156.559	8419.26	2.19379	384.171	0.455832	6	72.622	300.859	92.2781	103.562	1.18139	0.716499	K-Wm
810	1504	129.796	324.053	21978.2	2.49663	807.747	0.40054	6	152.693	785.382	115.005	167.325	1.53739	0.423088	K-Wm
811	1505	89.891	254.77	15848.5	2.83421	597.259	0.352832	6	112.903	566.34	92.577	142.089	1.33867	0.558024	K-Wm
814	1510	73.8796	118.812	5921.91	1.60818	307.891	0.621819	6	58.2024	211.617	68.3057	86.8553	1.12894	0.784618	K-Wm
815	1511	72.8401	126.896	7148.53	1.74212	351.246	0.574012	6	66.3981	255.45	90.3648	95.4275	1.17222	0.727752	K-Wm
816	1512	81.5004	131.492	7555.01	1.61339	362.54	0.619814	6	68.5331	269.975	90.0924	98.1031	1.17691	0.721958	K-Wm
817	1513	70.397	123.799	6361.69	1.75858	341.577	0.568641	6	64.5703	227.332	87.8165	90.0226	1.20839	0.684834	K-Wm
819	1515	139.618	293.16	23377.6	2.09973	780.118	0.476252	6	147.47	835.388	102.724	172.57	1.43968	0.482468	K-Wm
820	1516	116.396	204.856	14350.1	1.76	537.673	0.568181	6	101.64	512.793	114.719	135.205	1.26648	0.623457	K-Wm
826	1523	80.7608	159.403	9207.84	1.97377	432.682	0.506645	6	81.7924	329.038	87.8229	108.304	1.27232	0.617747	K-Wm
828	1525	97.5323	122.824	8788.3	1.25932	388.385	0.79408	6	73.4187	314.046	129.807	105.808	1.169	0.731762	K-Wm
829	1526	73.9437	113.445	5697.36	1.53421	308.635	0.651803	6	58.3431	203.593	65.2249	85.1926	1.15376	0.751229	K-Wm
831	1528	113.2	243.026	17332.5	2.14688	627.445	0.465793	6	118.61	619.368	85.6045	148.592	1.34478	0.552965	K-Wm
833	1532	128.975	158.941	13001	1.23234	481.028	0.811464	6	90.9315	464.585	161.711	128.693	1.19038	0.70571	K-Wm
834	1533	88.2725	124.146	7717	1.40639	351.076	0.71104	6	66.366	275.764	128.249	99.1493	1.12767	0.786385	K-Wm
838	1539	55.2861	204.428	8041.67	3.69764	470.746	0.270443	6	88.9879	287.366	85.7803	101.213	1.48122	0.455788	K-Wm
842	1546	110.031	182.866	11333	1.66196	496.879	0.601699	6	93.9281	404.981	122.359	120.154	1.31699	0.576545	K-Wm
843	1547	120.28	154.989	13616.8	1.28857	519.239	0.776055	6	98.1548	486.592	24.7397	131.705	1.25555	0.634354	K-Wm
844	1548	101.031	159.68	11611.2	1.5805	465.83	0.632712	6	88.0587	414.923	101.768	121.62	1.21981	0.672067	K-Wm
847	1551	333.805	583.687	94432.4	1.74859	1965.26	0.57189	6	371.504	3374.5	97.0246	346.837	1.80453	0.307094	K-Wm
849	1553	79.1475	246.533	12850	3.11485	628.564	0.321043	6	118.821	459.191	94.1539	127.943	1.5646	0.408504	K-Wm
851	1556	91.9608	105.535	6250.28	1.14761	335.949	0.871377	6	63.5064	223.351	169.062	89.2308	1.19903	0.695573	K-Wm
852	1557	81.2195	136.599	9236.88	1.68185	388.626	0.594582	6	73.4642	330.076	86.3854	108.475	1.14097	0.76816	K-Wm
853	1558	109.892	158.03	11943.1	1.43804	464.556	0.695389	6	87.8177	426.782	9.86581	123.346	1.19946	0.695075	K-Wm
854	1561	111.226	134.089	10918.3	1.20556	430.781	0.829491	6	81.4332	390.162	89.9358	117.935	1.16328	0.738979	K-Wm
855	1562	105.804	150.972	10337.2	1.4269	421.694	0.700819	6	79.7152	369.394	49.7724	114.753	1.17031	0.730124	K-Wm
856	1563	152.669	332.456	36119.5	2.17763	908.676	0.459216	6	171.772	1290.71	98.9111	214.504	1.3491	0.54943	K-Wm
857	1564	98.7594	119.924	8509.98	1.2143	358.275	0.82352	6	67.7269	304.101	49.2814	104.119	1.09587	0.832692	K-Wm
858	1565	240.664	372.477	57499.6	1.5477	1175.33	0.646118	6	222.179	2054.72	80.9425	270.643	1.38303	0.5228	K-Wm
859	1568	82.5153	137.54	7714.39	1.66684	355.028	0.599937	6	67.1131	275.67	67.4362	99.1325	1.14056	0.768714	K-Wm
860	1569	73.9646	116.427	5715.82	1.5741	316.747	0.635284	6	59.8765	204.252	89.8968	85.3305	1.18217	0.715556	K-Wm
861	1570	88.6426	150.01	8981.66	1.6923	414.796	0.59091	6	78.4113	320.956	107.98	106.965	1.23498	0.655658	K-Wm
862	1571	160.556	333.095	26210.8	2.07463	967.553	0.482013	6	182.902	936.632	88.8439	182.728	1.68632	0.351658	K-Wm
865	1574	104.008	164.97	10446.7	1.58612	457.133	0.630467	6	86.4146	373.309	113.752	115.36	1.262	0.627891	K-Wm
866	1580	100.58	195.685	12756	1.94558	523.047	0.513987	6	98.8746	455.832	0.0538433	127.474	1.30673	0.585632	K-Wm
868	1582	373.285	520.506	77343.4	1.39439	1814.5	0.717158	6	343.006	2763.83	128.713	313.889	1.84099	0.295051	K-Wm
870	1584	82.9719	205.484	11522.3	2.47655	487.451	0.403787	6	92.1457	411.744	112.687	121.153	1.28135	0.609068	K-Wm
871	1585	130.924	237.412	19865.9	1.81335	644.131	0.551464	6	121.764	709.9	85.9475	159.081	1.28951	0.601382	K-Wm
873	1587	64.7547	248.021	12265.8	3.83016	567.444	0.261086	6	107.267	438.312	93.5903	125.001	1.44571	0.478451	K-Wm
874	1588	108.518	146.905	12076.6	1.35373	433.31	0.7387	6	81.9111	431.552	95.4659	124.033	1.11258	0.807861	K-Wm
875	1589	105.661	194.693	12633.6	1.84261	529.951	0.542707	6	100.18	451.455	140.194	126.861	1.33039	0.564995	K-Wm
880	1596	151.867	213.792	19132.6	1.40776	635.955	0.710349	6	120.218	683.697	30.6507	156.118	1.29731	0.594172	K-Wm
881	1597	119.692	203.435	15787.4	1.69965	606.987	0.588355	6	114.742	564.155	158.839	141.814	1.36311	0.538196	K-Wm
883	1599	70.4069	139.302	7409.15	1.97853	357.112	0.505426	6	67.5071	264.763	80.343	97.1515	1.17065	0.729707	K-Wm
886	1607	106.399	177.45	13087.4	1.66778	475.426	0.599601	6	89.8727	467.671	58.3781	129.119	1.17263	0.727235	K-Wm
887	1608	129.703	275.76	24131.7	2.12609	668.806	0.470347	6	126.428	862.336	99.2338	175.331	1.21482	0.677606	K-Wm
888	1609	100.335	194.653	12761.2	1.94002	518.593	0.515458	6	98.0328	456.016	99.0326	127.5	1.29535	0.595974	K-Wm
889	1613	76.9678	106.271	6211.93	1.38072	304.612	0.724262	6	57.5827	221.981	76.9712	88.9567	1.09053	0.840855	K-Wm
890	1614	164.383	235.995	20359.9	1.43564	713.791	0.696552	6	134.932	727.553	65.0417	161.047	1.41153	0.501906	K-Wm
891	1615	213.623	350.147	44848.9	1.63909	970.017	0.610096	6	183.368	1602.66	65.4652	239.024	1.29244	0.598663	K-Wm
892	1616	87.8965	169.671	9171.83	1.93035	444.811	0.51804	6	84.0853	327.751	155.041	108.092	1.31055	0.582229	K-Wm
896	1622	73.546	184.784	9539.59	2.5125	473.653	0.39801	6	89.5374	340.893	79.992	110.238	1.36836	0.534072	K-Wm
897	1623	105.086	238.961	14807.6	2.27397	601.132	0.43976	6	113.636	529.143	84.5817	137.343	1.3939	0.514676	K-Wm
900	1626	79.6914	98.4091	5876.86	1.23488	289.856	0.809797	6	54.7932	210.007	105.617	86.5243	1.06688	0.878558	K-Wm
901	1629	191.809	257.816	26106.8	1.34413	807.669	0.743977	6	152.679	932.916	125.91	182.365	1.41046	0.502663	K-Wm
902	1630	124.007	304.726	22302.6	2.45732	831.086	0.406948	6	157.105	796.972	77.6192	168.555	1.57027	0.405557	K-Wm
909	1639	135.121	243.833	17207.8	1.80454	675.497	0.554156	6	127.693	614.915	91.0797	148.057	1.453	0.473662	K-Wm
910	1643	115.92	170.377	16180.5	1.46978	501.755	0.680374	6	94.8497	578.203	97.3644	143.569	1.11302	0.807231	K-Wm
913	1646	184.985	387.269	39324	2.09352	1099.9	0.477664	6	207.92	1405.23	89.3169	223.818	1.56505	0.408265	K-Wm
914	1647	65.0435	180.492	8038.36	2.77494	413.523	0.360369	6	78.1706	287.247	97.1169	101.193	1.30143	0.590417	K-Wm
915	1648	336.446	585.553	136785	1.74041	2134.23	0.574579	6	403.445	4887.96	73.131	417.431	1.62827	0.377179	K-Wm
918	1651	92.7485	217.962	15047.6	2.35004	537.416	0.425525	6	101.591	537.718	92.2339	138.452	1.23618	0.654388	K-Wm
919	1652	133.957	280.592	25310.2	2.09464	710.522	0.477408	6	134.314	904.451	110.653	179.562	1.26019	0.629695	K-Wm
921	1656	111.6	179.947	12829.9	1.61243	494.734	0.620181	6	93.5226	458.472	89.674	127.843	1.23244	0.65837	K-Wm
922	1657	84.654	270.313	15747.5	3.19315	622.132	0.31317	6	117.605	562.729	90.0763	141.635	1.39889	0.511017	K-Wm
923	1658	186.547	213.244	26949.8	1.14312	696.439	0.874801	6	131.652	963.038	96.8635	185.286	1.19705	0.697875	K-Wm
926	1661	67.0145	190.628	8771.76	2.84458	467.407	0.351546	6	88.3567	313.455	93.7805	105.708	1.40818	0.504296	K-Wm
927	1662	94.2691	248.917	13258.3	2.6405	641.307	0.378717	6	121.23	473.781	49.8576	129.96	1.57154	0.404899	K-Wm
929	1664	102.613	241.274	17065.2	2.35132	623.438	0.425294	6	117.852	609.817	122.367	147.442	1.34661	0.551459	K-Wm
931	1671	114.618	118.652	10334.8	1.03519	394.442	0.966005	6	74.5636	369.31	74.6837	114.74	1.09481	0.834308	K-Wm
934	1674	274.191	293.133	49375.4	1.06908	1133.68	0.935383	6	214.307	1764.41	103.627	250.796	1.4396	0.482522	K-Wm
935	1678	81.3765	117.078	7091.24	1.43872	334.029	0.695062	6	63.1436	253.402	148.767	95.0443	1.11925	0.798256	K-Wm
936	1679	238.05	555.45	61562	2.33333	1575.81	0.428571	6	297.885	2199.89	90	280.041	1.79206	0.311383	K-Wm
938	1684	144.003	319.354	35276.2	2.21769	828.573	0.450919	6	156.63	1260.58	94.6334	211.985	1.24479	0.645371	K-Wm
939	1685	84.6991	190.472	10020.5	2.2488	470.169	0.444681	6	88.8788	358.078	89.9507	112.982	1.3253	0.569339	K-Wm
940	1686	156.157	179.483	19958.2	1.14938	598.207	0.870037	6	113.083	713.197	115.951	159.45	1.1948	0.7005	K-Wm
941	1687	95.4019	317.664	21208.2	3.32975	753.605	0.300323	6	215.732	1247.2	90.0327	164.368	1.46015	0.469035	K-Wm
943	1689	121.458	237.511	16270.5	1.95551	646.386	0.511376	6	122.19	581.418	132.176	143.968	1.42987	0.489109	K-Wm
947	1694	68.4823	138.696	6895.69	2.02528	357.963	0.493758	6	67.6678	246.415	69.6769	93.7247	1.21634	0.675914	K-Wm
948	1697	67.8579	149.129	7004.16	2.19766	382.839	0.455029	6	72.3704	250.291	97.615	94.459	1.29075	0.600224	K-Wm
949	1698	106.307	163.647	12867.1	1.53938	471.622	0.649612	6	89.1536	459.799	77.7352	128.028	1.17317	0.726575	K-Wm
950	1699	152.711	252.13	21252.9	1.65103	741.679	0.605682	6	140.204	759.462	94.5739	164.541	1.43553	0.485261	K-Wm
952	1703	143.512	226.092	23161.1	1.57542	692.092	0.634751	6	130.83	827.653	104.744	171.769	1.28319	0.607325	K-Wm
953	1704	102.581	396.169	28401.8	3.86201	970.584	0.258933	6	183.475	1014.93	89.1096	190.212	1.62504	0.378678	K-Wm
955	1706	110.575	146.769	10598.2	1.32733	417.785	0.753393	6	78.9764	378.724	63.1834	116.194	1.14509	0.762637	K-Wm
956	1710	153.323	245.367	22599.7	1.60033	717.123	0.624871	6	135.562	807.589	98.4756	169.674	1.34601	0.551955	K-Wm
957	1711	206.151	228.265	32759.9	1.10727	786.618	0.903122	6	148.699	1170.66	165.46	204.285	1.2263	0.664972	K-Wm
958	1712	143.804	297.749	28181	2.07051	783.708	0.482972	6	148.149	1007.04	73.9688	189.471	1.31729	0.576286	K-Wm
959	1713	292.665	396.688	58761.1	1.35543	1451.32	0.737772	6	274.351	2099.8	72.9179	273.596	1.68936	0.350392	K-Wm
960	1714	103.875	132.25	9083.18	1.27317	384.841	0.785441	6	72.7488	324.584	53.0889	107.568	1.13938	0.770309	K-Wm
961	1717	143.387	239.054	16822.1	1.66719	689.342	0.599811	6	130.31	601.131	30.3634	146.388	1.49968	0.444632	K-Wm
964	1720	62.7674	149.443	6971.96	2.3809	351.61	0.42001	6	66.467	249.14	73.4554	94.2416	1.1882	0.708307	K-Wm
966	1722	82.1265	139.759	7163.3	1.70175	370.141	0.587629	6	69.9699	255.978	60.2897	95.5261	1.234	0.656702	K-Wm
967	1726	68.7143	164.509	8393.1	2.3941	411.468	0.417693	6	77.7823	299.924	77.7492	103.401	1.2673	0.622643	K-Wm
968	1727	174.614	231.633	25954.1	1.32655	694.446	0.753837	6	131.275	927.46	119.665	181.831	1.2163	0.675956	K-Wm
969	1728	115.515	367.808	26203.2	3.18406	936.518	0.314065	6	177.036	936.362	120.386	182.702	1.63247	0.375243	K-Wm
970	1729	93.4465	137.72	7898.29	1.47378	384.719	0.678526	6	72.7257	282.242	32.7352	100.307	1.22147	0.670249	K-Wm
973	1733	132.414	201.191	16875.8	1.51941	570.608	0.65815	6	107.865	603.05	90.2559	146.621	1.2394	0.650997	K-Wm
974	1734	127.854	211.388	18187	1.65336	596.434	0.604829	6	112.747	649.904	46.2616	152.211	1.24792	0.642134	K-Wm
975	1735	234.539	319.284	39904.2	1.36133	1017.36	0.734578	6	192.318	1425.96	26.7861	225.462	1.43705	0.484238	K-Wm
976	1736	97.3327	392.227	25210.2	4.02976	914.213	0.248154	6	172.819	900.875	99.4623	179.206	1.62467	0.378853	K-Wm
980	1742	124.074	230.424	17162.5	1.85714	610.663	0.538462	6	115.437	613.293	156.038	147.861	1.31528	0.57805	K-Wm
981	1743	270.452	421.003	69641.3	1.55666	1330.09	0.6424	6	251.435	2488.6	136.975	297.851	1.42218	0.494416	K-Wm
982	1744	88.0402	142.594	7744.3	1.61964	378.71	0.617419	6	71.5897	276.739	76.5177	99.3245	1.21428	0.678202	K-Wm
984	1750	89.871	130.762	7073.89	1.455	356.178	0.687285	6	67.3305	252.783	51.925	94.928	1.19493	0.700347	K-Wm
985	1751	104.141	123.27	9741.2	1.18368	392.713	0.844822	6	74.2369	348.098	132.97	111.396	1.12273	0.793325	K-Wm
986	1752	178.618	216.122	20660.9	1.20997	788.444	0.826468	6	149.044	738.31	139.764	162.233	1.54775	0.417443	K-Wm
987	1753	115.049	124.525	9581.03	1.08236	442.42	0.923907	6	83.6332	342.374	83.9375	110.477	1.27536	0.614799	K-Wm
988	1754	106.292	127.163	10485.1	1.19636	403.559	0.835872	6	76.2871	374.68	90.1258	115.572	1.11205	0.808628	K-Wm
989	1757	95.4112	168.341	9934.51	1.76438	433.979	0.566772	6	82.0377	355.006	96.8086	112.496	1.22857	0.662519	K-Wm
992	1760	93.0279	176.29	10425.8	1.89502	442.416	0.527698	6	83.6324	372.56	104.93	115.244	1.22259	0.669016	K-Wm
995	1766	113.222	127.629	9487.85	1.12725	394.964	0.887117	6	74.6624	339.044	19.7278	109.938	1.14414	0.76391	K-Wm
996	1767	105.526	133.871	8054.63	1.2686	402.802	0.788268	6	76.1441	287.829	160.996	101.295	1.26641	0.623521	K-Wm
997	1768	119.108	215.75	15131.8	1.81137	613.515	0.552067	6	115.976	540.729	79.2559	138.839	1.40729	0.50493	K-Wm
998	1769	202.893	377.309	43284.3	1.85964	1031.61	0.537737	6	195.012	1546.75	77.5982	234.818	1.39912	0.510844	K-Wm
999	1770	84.9547	190.67	9951.42	2.24437	462.177	0.445559	6	87.368	355.61	71.6665	112.592	1.30729	0.585139	K-Wm
1000	1772	80.8255	98.6294	5972.99	1.22028	320.229	0.819487	6	60.5349	213.442	84.7848	87.229	1.16915	0.731574	K-Wm
1001	1773	127.19	153.878	13784.8	1.20983	505.889	0.826564	6	95.6312	492.595	36.4632	132.515	1.21579	0.676519	K-Wm
1002	1774	95.3608	190.545	11822.6	1.99815	486.384	0.500462	6	91.944	422.477	89.0783	122.722	1.2622	0.627691	K-Wm
1005	1777	129.096	369.37	27101.6	2.8612	881.949	0.349504	6	166.72	968.465	75.0049	185.807	1.51165	0.43762	K-Wm
1006	1781	118.826	223.36	14426.5	1.87973	597.944	0.531991	6	113.033	515.526	110.225	135.565	1.4047	0.506793	K-Wm
1007	1782	75.1843	274.016	15710	3.64459	647.46	0.274379	6	122.393	561.391	100.214	141.466	1.45757	0.470696	K-Wm
1008	1783	79.7183	138.043	7719.35	1.73163	357.122	0.577489	6	67.5088	275.848	109.635	99.1644	1.14691	0.760217	K-Wm
1009	1784	89.5673	258.221	16032.7	2.88299	611.148	0.346863	6	115.529	572.92	86.8137	142.912	1.36191	0.539142	K-Wm
1012	1787	120.76	215.846	16113.7	1.78739	639.418	0.559474	6	120.873	575.818	119.786	143.273	1.42132	0.495013	K-Wm
1013	1788	122.429	283.509	24650.2	2.3157	699.204	0.431835	6	132.175	880.866	54.2744	177.205	1.2566	0.63329	K-Wm
1014	1789	193.846	393.918	41062.5	2.03212	1154.58	0.492096	6	218.258	1467.35	86.335	228.711	1.60771	0.386887	K-Wm
1018	1794	119.04	170.259	15065.2	1.43027	523.056	0.699169	6	98.8763	538.347	122.005	138.533	1.20245	0.69162	K-Wm
1019	1795	99.8907	188.38	12558.7	1.88586	501.024	0.530263	6	94.7115	448.779	112.316	126.484	1.26151	0.628372	K-Wm
1021	1797	120.564	144.113	11387.1	1.19532	455.029	0.836593	6	86.0168	406.915	59.9126	120.44	1.2032	0.690759	K-Wm
1022	1799	126.302	234.635	18019.6	1.85772	617.91	0.538293	6	116.807	643.922	103.661	151.509	1.29885	0.592766	K-Wm
1023	1800	87.1462	260.401	15283.4	2.9881	626.468	0.334661	6	118.425	546.147	101.31	139.533	1.42986	0.489117	K-Wm
1025	1802	192.979	825.517	67285.4	4.27775	1987.1	0.233768	6	375.633	2404.41	73.5231	292.769	2.16154	0.214029	K-Wm
1026	1803	312.033	558.653	107408	1.79036	1659.05	0.558546	6	313.621	3838.18	80.9605	369.899	1.42839	0.490123	K-Wm
1028	1805	113.571	152.208	12315.9	1.3402	433.718	0.746158	6	81.9882	440.102	105.945	125.256	1.10276	0.822318	K-Wm
1031	1816	174.125	282.309	32521.9	1.6213	943.128	0.616788	6	178.285	1162.16	103.134	203.542	1.47566	0.459224	K-Wm
1032	1817	88.0354	125.015	7525.06	1.42006	362.091	0.704198	6	68.4482	268.905	33.6857	97.9085	1.17779	0.720883	K-Wm
1033	1818	101.242	134.345	9667.03	1.32697	418.151	0.753599	6	79.0455	345.447	166.155	110.972	1.20003	0.694412	K-Wm
1036	1824	76.2395	227.159	10957.6	2.97954	563.972	0.335622	6	106.611	391.567	78.7726	118.147	1.52021	0.432705	K-Wm
1037	1825	88.8702	118.851	6517.27	1.33735	372.107	0.747746	6	70.3416	232.892	161.565	91.1167	1.30059	0.59118	K-Wm
1039	1827	52.7732	355.787	15466.8	6.7418	770.045	0.148328	6	145.566	552.699	87.592	140.367	1.74711	0.32761	K-Wm
1041	1830	90.081	155.117	8948.95	1.72197	422.246	0.580729	6	79.8197	319.787	83.6706	106.771	1.25946	0.630421	K-Wm
1043	1832	144.013	285.856	25331.1	1.98493	798.075	0.503795	6	150.865	905.196	103.031	179.636	1.41489	0.499524	K-Wm
1046	1836	89.6627	198.796	11848.1	2.21715	482.149	0.451029	6	91.1435	423.386	67.5897	122.854	1.24986	0.640139	K-Wm
1047	1837	165.851	207.36	24797.4	1.25028	672.308	0.799819	6	127.09	886.126	22.2862	177.733	1.20467	0.689065	K-Wm
1050	1844	116.625	145.196	10501.9	1.24498	442.56	0.803226	6	83.6597	375.283	161.969	115.664	1.21855	0.673466	K-Wm
1051	1849	89.3363	133.994	7621.76	1.49988	373.096	0.666718	6	70.5285	272.36	110.928	98.5355	1.20586	0.687708	K-Wm
1052	1850	66.5858	117.4	5850.79	1.76314	301.631	0.567169	6	57.0192	209.075	93.6882	86.3321	1.11269	0.807702	K-Wm
1053	1851	85.805	100.92	6074.97	1.17615	305.332	0.85023	6	57.7186	217.087	27.3151	87.9705	1.10536	0.818447	K-Wm
1054	1852	180.93	255.084	31456.6	1.40985	764.774	0.709294	6	144.57	1124.09	81.7305	200.18	1.2167	0.675516	K-Wm
1058	1857	73.7564	127.27	6815.7	1.72555	346.84	0.579525	6	65.5653	243.556	90.542	93.1795	1.18544	0.711607	K-Wm
1060	1859	160.24	235.671	23441.1	1.47074	694.749	0.679932	6	131.333	837.659	114.301	172.804	1.2804	0.609975	K-Wm
1062	1861	111.4	200.974	13546.9	1.80408	559.01	0.554299	6	105.673	484.092	89.9508	131.367	1.35521	0.54449	K-Wm
1063	1862	78.3704	116.849	6889.33	1.49099	340.648	0.670696	6	64.3947	246.187	95.9659	93.6814	1.15804	0.745684	K-Wm
1067	1866	220.621	574.791	76818.3	2.60533	1720.36	0.383829	6	325.21	2745.07	84.379	312.822	1.75143	0.325998	K-Wm
1070	1869	98.792	165.442	12303.2	1.67465	475.218	0.597139	6	89.8332	439.65	75.9638	125.191	1.2089	0.684262	K-Wm
1071	1874	87.0439	196.287	9988.24	2.25503	484.652	0.443453	6	91.6167	356.926	102.558	112.8	1.36833	0.534095	K-Wm
1072	1875	73.2374	175.409	7501.62	2.39507	441.565	0.417524	6	83.4716	268.067	87.1376	97.7558	1.43854	0.483232	K-Wm
1073	1876	140.362	276.676	24225.4	1.97117	722.16	0.507314	6	136.514	865.683	129.094	175.671	1.30919	0.583436	K-Wm
1074	1877	75.7129	127.323	6823.21	1.68165	324.376	0.594654	6	212.157	1391.34	109.294	93.2308	1.10805	0.814481	K-Wm
1076	1884	197.244	274.677	34259.4	1.39258	867.81	0.718094	6	164.047	1224.24	123.962	208.908	1.32294	0.571372	K-Wm
1079	1887	104.253	119.109	8946.85	1.1425	368.265	0.875274	6	69.6152	319.712	146.162	106.758	1.09858	0.828591	K-Wm
1083	1891	206.289	230.443	28881.6	1.11709	799.719	0.895183	6	151.176	1032.07	158.199	191.812	1.3278	0.567198	K-Wm
1089	1900	119.24	200.017	14387.4	1.67742	546.422	0.596152	6	103.293	514.126	99.4175	135.38	1.28541	0.605222	K-Wm
1091	1902	165.134	203.486	18871.5	1.23225	668.125	0.811524	6	126.3	674.366	27.0148	155.049	1.37233	0.530984	K-Wm
1092	1903	135.766	205.469	16597.1	1.51341	564.448	0.660761	6	106.701	593.089	49.7815	145.405	1.23627	0.654294	K-Wm
1094	1905	148.647	263.733	25576.4	1.77422	741.163	0.563626	6	140.106	913.963	66.8014	180.503	1.30767	0.584794	K-Wm
1095	1909	129.652	260.25	22483.8	2.0073	694.017	0.49818	6	131.194	803.448	69.9909	169.239	1.30599	0.586298	K-Wm
1098	1912	127.364	212.183	16903.3	1.66596	609.935	0.600254	6	115.3	604.032	135.743	146.741	1.32374	0.570681	K-Wm
1099	1913	119.85	222.285	16233.3	1.85469	577.633	0.539172	6	109.193	580.09	97.7715	143.803	1.27925	0.611072	K-Wm
1102	1916	164.304	304.538	30230	1.8535	840.751	0.53952	6	158.932	1080.26	79.2869	196.238	1.36444	0.537147	K-Wm
1103	1917	128.42	142.286	13441.3	1.10798	471.339	0.902546	6	89.1001	480.319	155.556	130.854	1.14715	0.759912	K-Wm
1105	1919	229.161	347.29	41282.3	1.51548	1223.91	0.659856	6	231.363	1475.2	119.533	229.323	1.6997	0.346142	K-Wm
1106	1920	205.891	260.939	35374.7	1.26736	860.716	0.78904	6	162.706	1264.1	92.8379	212.281	1.29128	0.599739	K-Wm
1108	1925	103.836	167.631	10174.3	1.61438	444.536	0.619434	6	84.0332	363.576	86.7474	113.846	1.24354	0.64667	K-Wm
1109	1926	107.762	249.113	16412.8	2.31169	627.486	0.432583	6	118.617	586.506	91.5482	144.596	1.38203	0.523559	K-Wm
1111	1928	84.6773	560.739	26638.9	6.62207	1203.57	0.15101	6	227.518	951.931	90.0101	184.214	2.08074	0.230975	K-Wm
1112	1929	73.8832	106.018	5635.51	1.43494	293.957	0.696891	6	55.5684	201.382	89.8948	84.7289	1.1049	0.819136	K-Wm
1114	1931	76.4737	199.287	9832.19	2.60595	480.043	0.383737	6	90.7454	351.349	55.7577	111.916	1.36603	0.535894	K-Wm
1115	1933	78.2775	165.321	7686.41	2.11198	408.97	0.473489	6	77.31	274.671	93.5763	98.9526	1.31624	0.577205	K-Wm
1118	1936	135.877	145.985	13757.4	1.0744	494.024	0.930755	6	93.3884	491.615	25.4076	132.383	1.18846	0.707993	K-Wm
1119	1940	117.796	318.218	24377.3	2.70143	793.656	0.370174	6	150.03	871.114	96.9152	176.221	1.43431	0.486084	K-Wm
1122	1944	130.153	212.421	15338.7	1.63208	622.479	0.612713	6	117.671	548.123	102.757	139.785	1.41819	0.497199	K-Wm
1123	1945	90.588	162.329	10036.5	1.79195	416.084	0.558052	6	78.6548	358.651	108.122	113.072	1.17191	0.728133	K-Wm
1127	1949	126.197	178.337	15462.9	1.41316	591.426	0.707632	6	111.801	552.559	99.7992	140.349	1.34203	0.555237	K-Wm
1128	1954	119.563	201.825	12770.1	1.68803	587.655	0.592407	6	111.088	456.333	144.724	127.545	1.46734	0.464449	K-Wm
1129	1955	89.1269	153.814	9434.11	1.72579	440.707	0.579446	6	83.3094	337.124	160.262	109.627	1.28028	0.610086	K-Wm
1130	1956	134.375	185.748	17992.1	1.38231	566.407	0.723429	6	107.071	642.942	100.305	151.393	1.1915	0.704392	K-Wm
1131	1957	92.9329	230.865	11749.6	2.48421	565.932	0.402543	6	106.982	419.866	105.062	122.342	1.47319	0.460769	K-Wm
1135	1963	73.4683	126.177	6756.24	1.71743	332.283	0.582266	6	62.8135	241.431	70.2854	92.7721	1.14067	0.768559	K-Wm
1136	1964	102.952	306.759	19234.4	2.97962	736.437	0.335613	6	139.213	687.332	68.7186	156.532	1.49831	0.445448	K-Wm
1139	1969	220.628	389.155	41670.1	1.76385	1145.31	0.566941	6	216.505	1489.06	94.576	230.397	1.58313	0.398994	K-Wm
1141	1976	262.894	316.914	47988.4	1.20548	1225.92	0.829546	6	231.743	1714.84	9.09861	247.248	1.57906	0.401054	K-Wm
1144	1979	189.174	329.465	34974.4	1.74159	952.34	0.574187	6	180.027	1249.8	12.8043	211.077	1.43688	0.484347	K-Wm
1146	1984	153.662	175.086	16622.5	1.13942	575.377	0.877637	6	108.767	593.999	63.7024	145.517	1.25924	0.63064	K-Wm
1147	1985	148.97	295.487	25531.6	1.98354	805.724	0.50415	6	152.311	912.36	49.7636	180.345	1.42283	0.493963	K-Wm
1151	1990	162.012	195.82	18322.8	1.20867	693.286	0.827354	6	131.056	654.757	69.8956	152.778	1.44518	0.478803	K-Wm
1152	1996	69.1222	171.729	8892.95	2.48443	410.805	0.402506	6	77.6568	317.786	86.1688	106.436	1.22919	0.661858	K-Wm
1154	1998	74.326	201.099	8913.64	2.70564	497.194	0.369598	6	93.9875	318.525	90	106.56	1.48595	0.452891	K-Wm
1158	2004	126.673	211.347	15103.2	1.66845	610.009	0.599359	6	115.314	539.705	163.301	138.707	1.40058	0.509782	K-Wm
1160	2006	89.9085	140.885	8747.56	1.56698	370.971	0.638169	6	70.1269	312.591	45.2587	105.562	1.11918	0.798356	K-Wm
1162	2013	65.0836	118.476	5983.96	1.82037	324.61	0.549338	6	61.3629	213.834	93.4872	87.3091	1.18406	0.713272	K-Wm
1165	2018	74.2526	141.523	7426.69	1.90597	357.669	0.524668	6	67.6123	265.39	76.0119	97.2664	1.17109	0.729158	K-Wm
1171	2027	111.524	235.695	16427.5	2.11341	615.559	0.47317	6	116.363	587.028	60.5842	144.661	1.35516	0.544529	K-Wm
1172	2028	80.0793	136.322	6929.83	1.70233	368.101	0.587429	6	69.5842	247.635	58.737	93.9564	1.2477	0.642361	K-Wm
1173	2029	67.5797	137.286	5898.43	2.03147	333.006	0.492254	6	62.9502	210.778	86.5186	86.6829	1.22346	0.668068	K-Wm
1174	2030	126.183	148.72	12791.7	1.1786	478.536	0.848462	6	90.4605	457.106	83.6598	127.653	1.19387	0.701599	K-Wm
1175	2035	153.503	312.444	30497.1	2.03543	808.54	0.491298	6	152.843	1089.8	90.0005	197.104	1.3064	0.585929	K-Wm
1179	2039	127.167	311.208	25825.8	2.44723	800.592	0.408625	6	151.341	922.875	117.378	181.381	1.40569	0.506083	K-Wm
1182	2046	92.9479	156.832	9267.07	1.68732	415.174	0.592657	6	78.4827	331.155	54.6103	108.652	1.21692	0.675262	K-Wm
1183	2047	176.141	276.016	32932	1.56702	825.94	0.638153	6	156.132	1176.81	64.9527	204.821	1.28424	0.606332	K-Wm
1186	2050	119.307	208.28	17116.9	1.74575	564.847	0.57282	6	106.776	611.665	101.31	147.665	1.21821	0.673835	K-Wm
1188	2053	71.2699	147.96	6613.2	2.07605	352.603	0.481684	6	66.6547	236.32	101.694	91.7849	1.22345	0.66808	K-Wm
1192	2057	184.488	360.777	39183.8	1.95556	1004.8	0.511363	6	189.943	1400.22	117.738	223.418	1.43229	0.487459	K-Wm
1193	2059	228.305	317.319	44197.1	1.38989	934.031	0.719482	6	176.566	1579.36	74.7016	237.28	1.25363	0.636297	K-Wm
1194	2060	93.5911	222.449	13094.7	2.37682	556.505	0.42073	6	105.2	467.932	117.238	129.155	1.37223	0.531062	K-Wm
1198	2064	287.477	487.184	65598.8	1.69469	1568.05	0.590079	6	296.418	2344.15	101.231	289.077	1.7275	0.335094	K-Wm
1200	2068	250.912	534.162	83432.6	2.12888	1348.4	0.469729	6	254.895	2981.43	69.0109	326.012	1.31721	0.576356	K-Wm
1204	2076	190.919	230.342	32537.6	1.20649	770.35	0.82885	6	145.624	1162.72	61.1536	203.591	1.20504	0.68865	K-Wm
1207	2081	248.399	503.244	70768.6	2.02595	1389.38	0.493595	6	262.642	2528.89	67.0525	300.252	1.47369	0.460458	K-Wm
1209	2083	125.074	197.496	15046	1.57904	581.805	0.633297	6	109.982	537.663	123.841	138.445	1.33836	0.558286	K-Wm
1211	2089	78.3296	133.792	7883.22	1.70807	346.74	0.585457	6	65.5462	281.703	72.8841	100.211	1.10194	0.823543	K-Wm
1212	2090	79.6324	121.45	6500.68	1.52513	320.189	0.655683	6	60.5273	232.299	91.2253	91.0007	1.12055	0.796406	K-Wm
1214	2092	111.275	309.597	25093.6	2.78226	777.537	0.35942	6	146.982	896.711	112.742	178.792	1.38498	0.521328	K-Wm
1215	2094	84.6897	190.603	10274.2	2.25061	487.627	0.444324	6	92.179	367.143	89.9755	114.403	1.35744	0.542701	K-Wm
1219	2104	133.018	475.216	41971.9	3.57258	1145.18	0.27991	6	216.481	1499.85	96.4828	231.23	1.57725	0.401975	K-Wm
1222	2107	153.398	338.776	25995.9	2.20848	850.366	0.452801	6	160.75	928.953	89.8377	181.977	1.48819	0.451526	K-Wm
1223	2108	149.361	302.37	27299.7	2.02442	808.29	0.493968	6	152.796	975.542	84.506	186.485	1.38036	0.524823	K-Wm
1224	2109	157.835	248.276	18420.2	1.573	713.112	0.635726	6	134.804	658.236	86.9421	153.183	1.48257	0.454954	K-Wm
1226	2115	81.3046	200.96	11602.1	2.47169	479.929	0.404582	6	90.7239	414.596	123.912	121.572	1.25723	0.632662	K-Wm
1227	2116	202.359	381.164	45280.3	1.88361	1045.26	0.530896	6	197.591	1618.07	107.881	240.171	1.38603	0.520539	K-Wm
1233	2125	81.6323	150.127	7958.8	1.83906	387.952	0.543755	6	73.3368	284.404	103.625	100.691	1.22704	0.664174	K-Wm
1234	2126	81.065	170.48	10357.4	2.103	450.42	0.47551	6	85.1455	370.118	96.2505	114.866	1.24881	0.641219	K-Wm
1236	2128	137.348	323.074	28256.8	2.35223	871.055	0.425129	6	164.661	1009.74	87.5412	189.726	1.46214	0.467758	K-Wm
1237	2133	88.1708	168.729	11188	1.91366	430.14	0.522559	6	81.312	399.797	99.4779	119.382	1.14747	0.759486	K-Wm
1238	2134	100.617	171.324	11238.2	1.70273	456.26	0.587292	6	86.2495	401.592	80.5157	119.65	1.21442	0.67805	K-Wm
1240	2137	95.2759	165.55	10705.8	1.73759	439.847	0.57551	6	83.1469	382.568	28.2248	116.782	1.19949	0.695034	K-Wm
1248	2152	81.7504	187.039	9724.09	2.28793	448.642	0.437077	6	84.8094	347.486	85.6013	111.299	1.28375	0.606791	K-Wm
1249	2157	146.068	207.025	20685.2	1.41732	656.567	0.705559	6	124.115	739.178	174.302	162.329	1.28811	0.602687	K-Wm
1250	2158	104.475	124.923	9354.42	1.19573	380.086	0.836309	6	398.807	5090.45	96.1668	109.163	1.10886	0.813285	K-Wm
1253	2161	81.2764	141.044	7901.35	1.73536	386.466	0.57625	6	73.0559	282.351	81.1781	100.327	1.22678	0.66446	K-Wm
1263	2175	126.997	280.37	21855.1	2.20769	705.962	0.452961	6	133.452	780.984	90	166.856	1.34744	0.550784	K-Wm
1265	2177	94.2475	134.551	10126.6	1.42763	399.713	0.70046	6	75.5601	361.871	100.653	113.579	1.12078	0.796084	K-Wm
1269	2181	51.0541	142.232	5791.71	2.78591	346.794	0.358949	6	65.5564	206.964	76.0035	85.8951	1.2858	0.604859	K-Wm
1270	2182	70.7654	171.802	8411.2	2.42777	426.472	0.4119	6	80.6186	300.571	94.8441	103.513	1.3121	0.580853	K-Wm
1271	2185	85.1249	142.74	8597.37	1.67683	368.405	0.596363	6	69.6417	307.223	89.7599	104.652	1.12111	0.795619	K-Wm
1272	2186	73.0552	143.396	6789.21	1.96285	367.835	0.509464	6	69.5341	242.61	58.7844	92.9983	1.25965	0.630235	K-Wm
1278	2193	127.56	361.26	32526.5	2.83208	836.134	0.353097	6	158.059	1162.32	73.3774	203.556	1.30817	0.584352	K-Wm
1281	2197	118.509	158.971	12229.6	1.34143	463.06	0.745474	6	87.535	437.021	105.381	124.816	1.18151	0.716356	K-Wm
1282	2198	99.0819	104.083	7605.9	1.05048	362.516	0.951948	6	165.49	1432.58	76.8628	98.433	1.17289	0.726919	K-Wm
1283	2199	82.9481	150.313	9725.77	1.81214	421.784	0.551835	6	79.7324	347.546	95.2965	111.308	1.20679	0.686646	K-Wm
1285	2205	136.009	205.869	15121	1.51365	566.901	0.660657	6	107.165	540.343	116.603	138.789	1.30083	0.590958	K-Wm
1288	2216	88.7765	187.544	10691.7	2.11254	513.037	0.473363	6	96.9824	382.065	102.265	116.705	1.4	0.510201	K-Wm
1291	2219	99.5721	184.519	13094.1	1.85312	483.745	0.539632	6	91.4452	467.912	70.6927	129.152	1.19285	0.7028	K-Wm
1292	2224	195.139	425.543	46494.2	2.18071	1104.38	0.458566	6	208.767	1661.45	77.467	243.369	1.44518	0.4788	K-Wm
1294	2229	73.5553	111.119	6078.46	1.51069	299.617	0.66195	6	56.6384	217.211	90.0795	87.9958	1.08436	0.850451	K-Wm
1298	2233	173.419	217.78	26614.7	1.2558	726.469	0.796303	6	137.329	951.064	5.52754	184.13	1.2565	0.633398	K-Wm
1299	2237	229.888	262.804	46544.9	1.14318	936.576	0.874754	6	177.046	1663.26	5.19443	243.501	1.22493	0.666463	K-Wm
1303	2241	71.9516	229.056	12095.8	3.18348	546.852	0.314122	6	103.375	432.24	103.314	124.132	1.403	0.508027	K-Wm
1305	2243	187.317	268.869	30051.6	1.43537	872.184	0.696685	6	164.874	1073.88	89.036	195.659	1.41964	0.496182	K-Wm
1307	2245	170.628	222.437	25363.6	1.30364	698.323	0.767085	6	132.008	906.357	88.0241	179.751	1.23725	0.653262	K-Wm
1308	2246	117.626	212.462	14027.6	1.80625	559.722	0.553633	6	105.808	501.272	76.6075	133.677	1.33348	0.562379	K-Wm
1310	2253	75.244	141.98	7969.64	1.88693	379.356	0.52996	6	71.7118	284.792	6.2521	100.759	1.19904	0.695561	K-Wm
1312	2255	76.6533	127.809	7392.11	1.66736	344.167	0.59975	6	65.0599	264.154	83.8061	97.0397	1.12951	0.783827	K-Wm
1315	2258	103.07	206.406	16374.8	2.00258	545.207	0.499356	6	145.826	850.278	90	144.429	1.2022	0.691902	K-Wm
1320	2263	69.907	118.436	6093.6	1.69419	322.146	0.590252	6	60.8972	217.752	81.1219	88.1053	1.16445	0.737493	K-Wm
1325	2268	156.345	231.465	24888.6	1.48047	696.307	0.675461	6	131.627	889.383	67.1284	178.06	1.24539	0.644746	K-Wm
1327	2270	125.068	136.832	11206.8	1.09406	438.925	0.914027	6	82.9726	400.471	110.556	119.483	1.16992	0.730619	K-Wm
1328	2271	133.606	191.752	14210.3	1.43521	557.25	0.696761	6	105.34	507.799	77.8948	134.545	1.31903	0.574769	K-Wm
1335	2282	128.527	154.739	14000.8	1.20394	480.134	0.830604	6	90.7625	500.313	102.529	133.549	1.14496	0.762814	K-Wm
1338	2289	62.2496	123.239	5919.68	1.97976	314.055	0.505111	6	59.3676	211.537	104.358	86.8389	1.15176	0.753837	K-Wm
1341	2295	146.537	273.746	22309	1.8681	717.163	0.535304	6	135.57	797.204	77.7352	168.58	1.35482	0.544797	K-Wm
1342	2296	175.94	302.928	26922.8	1.72177	836.738	0.580799	6	158.174	962.074	135.061	185.193	1.43891	0.482981	K-Wm
1343	2297	89.329	147.816	9143.37	1.65474	397.155	0.604326	6	75.0766	326.734	111.993	107.924	1.17196	0.728073	K-Wm
1347	2307	129.03	308.073	28163.7	2.38761	780.795	0.418828	6	147.598	1006.42	93.0467	189.413	1.3128	0.580236	K-Wm
1350	2314	94.8945	137.974	8203.04	1.45397	375.653	0.687771	6	71.012	293.132	90.6902	102.224	1.17032	0.730113	K-Wm
1353	2320	80.2396	116.51	6617.28	1.45203	342.536	0.688693	6	64.7515	236.466	96.7098	91.8131	1.18815	0.708365	K-Wm
1356	2324	71.9472	296.325	12839	4.11865	655.972	0.242798	6	124.002	458.795	88.388	127.888	1.63352	0.374756	K-Wm
1360	2331	108.026	223.649	15852.1	2.07034	571.732	0.483013	6	108.078	566.468	84.9205	142.105	1.28131	0.609103	K-Wm
1362	2333	105.698	252.37	19106.3	2.38766	632.488	0.41882	6	119.563	682.756	89.7735	156.01	1.29113	0.599878	K-Wm
1371	2348	80.5104	149.421	8349.76	1.85592	385.12	0.538815	6	72.8016	298.375	101.396	103.134	1.18923	0.707084	K-Wm
1375	2352	97.1897	190.204	10934.6	1.95704	506.725	0.510977	6	95.7893	390.744	117.259	118.023	1.36734	0.534869	K-Wm
1381	2367	63.3718	154.571	7102.22	2.43911	379.982	0.409985	6	71.8302	253.795	144.185	95.1179	1.27225	0.617814	K-Wm
1387	2376	116.38	241.749	16269	2.07723	615.421	0.48141	6	116.337	581.367	100.23	143.961	1.36143	0.53952	K-Wm
1388	2377	71.1129	171.587	8237.82	2.41287	407.989	0.414444	6	77.1246	294.375	99.9669	102.44	1.26837	0.621591	K-Wm
1398	2393	328.604	402.486	78770.1	1.22483	1243.02	0.816437	6	234.976	2814.82	48.3665	316.771	1.24969	0.640313	K-Wm
1402	2397	91.7115	116.793	7085.16	1.27348	334.312	0.785248	6	63.197	253.185	103.221	95.0036	1.12068	0.796224	K-Wm
1403	2398	177.948	247.237	26217.1	1.38938	764.863	0.719748	6	144.587	936.856	98.427	182.75	1.3329	0.562868	K-Wm
1411	2416	80.21	126.551	7351.82	1.57774	359.639	0.633816	6	67.9847	262.714	110.634	96.7749	1.18352	0.713923	K-Wm
1422	2435	143.785	356.304	32033.2	2.47804	894.781	0.403544	6	169.146	1144.69	66.6814	202.007	1.41066	0.502524	K-Wm
1423	2436	123.874	149.335	12296.9	1.20554	474.474	0.829503	6	89.6926	439.423	76.756	125.159	1.20731	0.686056	K-Wm
1427	2443	78.9863	147.317	8314.62	1.8651	370.446	0.536166	6	70.0276	297.119	70.3839	102.917	1.14633	0.760996	K-Wm
1428	2444	105.771	121.309	8079.23	1.14691	382.556	0.87191	6	72.3168	288.708	89.4552	101.45	1.20092	0.693378	K-Wm
1430	2446	64.0492	156.516	6477.24	2.44368	377.708	0.409218	6	71.4004	231.461	83.9933	90.8364	1.32424	0.570251	K-Wm
1432	2448	227.194	338.421	46333	1.48957	960.634	0.671333	6	181.594	1655.69	153.587	242.946	1.25927	0.630615	K-Wm
1434	2453	81.5993	109.777	6268.61	1.34532	324.46	0.743316	6	61.3347	224.006	59.2295	89.3616	1.15633	0.747889	K-Wm
1435	2454	107.915	126.155	7670.45	1.16902	417.57	0.855416	6	78.9357	274.1	55.7093	98.8498	1.34532	0.552525	K-Wm
1442	2462	101.698	146.999	9555.06	1.44544	450.017	0.69183	6	85.0694	341.446	43.3634	110.327	1.29902	0.592605	K-Wm
1446	2471	173.92	233.062	27146.2	1.34006	695.405	0.746236	6	131.457	970.058	125.558	185.96	1.19094	0.705055	K-Wm
1447	2472	126.96	253.92	21914.7	2	671.136	0.5	6	126.869	783.113	89.9999	167.083	1.27923	0.61109	K-Wm
1448	2473	160.995	309.737	26367.3	1.92389	834.879	0.519779	6	157.822	942.223	92.3834	183.273	1.45076	0.475125	K-Wm
1451	2480	72.6247	106.697	5777.65	1.46916	293.48	0.680662	6	55.4783	206.462	94.3987	85.7908	1.08945	0.842527	K-Wm
1457	2493	170.039	222.843	25586.4	1.31054	684.023	0.763044	6	129.305	914.319	104.918	180.538	1.20662	0.686844	K-Wm
1458	2494	98.0236	137.534	9658.48	1.40307	403.446	0.712723	6	76.2658	345.142	63.8182	110.923	1.15834	0.745295	K-Wm
1459	2495	64.9089	128.888	6711.09	1.98568	337.435	0.503606	6	63.7873	239.818	2.48803	92.4617	1.16225	0.740292	K-Wm
1462	2503	151.879	395.826	28678.4	2.60619	1013.25	0.383702	6	191.541	1024.81	86.0887	191.136	1.68828	0.350842	K-Wm
1463	2508	78.2716	364.285	17855.6	4.65412	821.088	0.214863	6	155.215	638.064	103.359	150.818	1.73383	0.332649	K-Wm
1476	2524	110.941	175.298	13310.9	1.58011	499.402	0.632867	6	94.4049	475.66	38.1572	130.217	1.22138	0.670344	K-Wm
1484	2537	66.979	129.364	5921.04	1.93142	324.276	0.517754	6	61.2999	211.586	108.435	86.8489	1.18911	0.707224	K-Wm
1491	2551	121.607	177.418	13844.8	1.45894	504.157	0.685431	6	95.3038	494.738	75.6884	132.803	1.209	0.684139	K-Wm
1497	2562	153.377	494.053	46672	3.22116	1191.95	0.310447	6	225.322	1667.81	104.534	243.834	1.55681	0.4126	K-Wm
1498	2563	93.3294	256.601	13999.7	2.74941	602.2	0.363714	6	113.837	500.274	97.9412	133.544	1.4361	0.484873	K-Wm
1500	2565	141.034	310.664	24574	2.20276	831.382	0.453975	6	157.161	878.142	137.49	176.931	1.49647	0.446544	K-Wm
1506	2582	242.631	489.322	68695.2	2.01674	1323.25	0.495851	6	250.142	2454.79	121.037	295.821	1.42457	0.492756	K-Wm
1510	2586	95.249	248.649	14779.2	2.61052	597.819	0.383066	6	113.009	528.128	90.1052	137.211	1.38755	0.519399	K-Wm
1516	2597	132.955	157.347	11975.2	1.18346	470.233	0.844982	6	88.8908	427.928	46.8983	123.511	1.21249	0.680216	K-Wm
1520	2604	104.977	184.294	12812.1	1.75555	486.756	0.569621	6	92.0144	457.834	106.083	127.754	1.21341	0.679183	K-Wm
1522	2608	130.466	201.081	18913.7	1.54124	566.334	0.648826	6	107.057	675.872	87.9546	155.222	1.16196	0.740663	K-Wm
1524	2610	85.3812	130.646	7246.32	1.53014	357.856	0.653533	6	67.6477	258.944	52.4053	96.078	1.18619	0.710706	K-Wm
1529	2618	158.335	300.897	28511.6	1.90039	790.381	0.526208	6	149.41	1018.85	107.195	190.579	1.32078	0.573243	K-Wm
1534	2626	121.678	201.433	13253.1	1.65546	556.956	0.604063	6	105.285	473.595	41.3969	129.934	1.36511	0.536619	K-Wm
1537	2629	295.294	471.152	61802.6	1.59554	1477.25	0.626748	6	279.254	2208.49	122.021	280.588	1.6767	0.355703	K-Wm
1538	2630	143.704	229.82	25982.4	1.59926	651.548	0.625289	6	123.166	928.469	98.7613	181.93	1.14055	0.768732	K-Wm
1541	2637	79.7953	161.322	7873.75	2.02169	411.334	0.494635	6	77.757	281.365	77.4064	100.151	1.308	0.584496	K-Wm
1546	2648	194.863	307.555	33457.1	1.57831	908.81	0.633587	6	171.798	1195.57	65.7955	206.447	1.40196	0.508782	K-Wm
1549	2651	77.7131	122.54	6198.61	1.57683	329.689	0.634184	6	192.665	1469.68	121.783	88.8612	1.18158	0.716269	K-Wm
1550	2652	196.934	265.582	35035.9	1.34859	756.007	0.741517	6	142.912	1251.99	135	211.262	1.13966	0.769929	K-Wm
1551	2653	112.714	164.021	13151.6	1.4552	489.326	0.687192	6	92.5002	469.968	67.7572	129.436	1.20396	0.689878	K-Wm
1553	2658	79.4649	95.4493	6181.47	1.20115	313.904	0.832536	6	59.3391	220.892	89.7925	88.7383	1.12656	0.787932	K-Wm
1557	2662	80.6105	104.563	6017.88	1.29714	303.889	0.770927	6	57.446	215.047	35.6649	87.5562	1.10535	0.81847	K-Wm
1558	2666	71.6301	206.238	9549.6	2.87921	476.566	0.347318	6	90.0882	341.251	101.443	110.295	1.37606	0.528114	K-Wm
1559	2667	81.3834	137.643	8263.45	1.6913	372.078	0.591263	6	70.3361	295.291	74.0546	102.6	1.15494	0.749693	K-Wm
1561	2669	152.354	233.854	19214.2	1.53494	659.589	0.651492	6	124.686	686.611	123.69	156.45	1.34267	0.554708	K-Wm
1562	2670	60.1645	166.16	7047.81	2.76176	395.053	0.362087	6	74.6792	251.85	11.788	94.7528	1.3278	0.567196	K-Wm
1564	2673	79.4586	132.329	6600.86	1.66538	363.268	0.600462	6	68.6707	235.879	89.9143	91.6992	1.26163	0.628255	K-Wm
1567	2676	131.548	376.13	27755	2.85926	911.371	0.34974	6	172.282	991.811	91.4321	188.034	1.54358	0.419701	K-Wm
1568	2677	148.881	282.489	24213	1.89742	748.046	0.527032	6	141.408	865.243	110.192	175.626	1.35647	0.543478	K-Wm
1570	2682	101.191	332.968	20504.1	3.2905	774.577	0.303906	6	146.423	732.704	103.325	161.616	1.52634	0.42924	K-Wm
1574	2688	78.874	115.02	6922.12	1.45828	326.518	0.685739	6	61.7236	247.359	74.8059	93.9042	1.10737	0.815485	K-Wm
1579	2698	78.864	120.702	5647.29	1.5305	318.938	0.65338	6	60.2907	201.803	59.628	84.8174	1.19754	0.697297	K-Wm
1582	2701	131.789	360.595	27313.3	2.73616	860.129	0.365476	6	162.595	976.029	88.0389	186.531	1.46853	0.4637	K-Wm
1583	2702	84.9543	138.416	7594.57	1.6293	379.891	0.613762	6	71.813	271.389	112.309	98.3596	1.23002	0.660961	K-Wm
1584	2703	115.879	360.071	29042.3	3.10729	855.844	0.321823	6	161.785	1037.81	89.6506	192.345	1.41705	0.498002	K-Wm
1585	2712	148.059	195.571	19512.4	1.3209	636.235	0.75706	6	120.271	697.267	170.388	157.66	1.28519	0.605432	K-Wm
1586	2713	140.359	321.431	23738.1	2.29006	869.302	0.436669	6	164.329	848.27	70.3679	173.895	1.59204	0.394542	K-Wm
1588	2715	79.5749	126.718	6833.72	1.59244	337.798	0.627968	6	63.856	244.2	119.241	93.3026	1.15301	0.752197	K-Wm
1591	2722	124.702	261.32	22677.5	2.09556	672.344	0.477199	6	127.097	810.372	107.86	169.966	1.25979	0.63009	K-Wm
1597	2730	120.02	325.482	25538.4	2.71189	836.489	0.368747	6	158.127	912.605	123.341	180.369	1.47696	0.458419	K-Wm
1600	2737	135.638	306.326	23919.4	2.25841	789.424	0.442789	6	149.23	854.749	57.7642	174.558	1.44026	0.48208	K-Wm
1601	2738	87.2066	138.676	9119.43	1.5902	383.304	0.628852	6	171.543	1360.55	1.56194	107.783	1.13257	0.779596	K-Wm
1602	2739	87.3311	259.112	14510	2.96701	605.559	0.337039	6	114.472	518.508	96.7098	135.956	1.4185	0.496984	K-Wm
1605	2745	151.929	314.234	28813.2	2.0683	798.217	0.48349	6	150.892	1029.63	78.3705	191.585	1.32688	0.567988	K-Wm
1607	2750	107.974	209.563	15238.3	1.94087	538.634	0.515234	6	101.821	544.534	113.938	139.326	1.23121	0.659687	K-Wm
1611	2758	90.2294	215.774	13325.2	2.39139	544.797	0.418167	6	102.986	476.17	78.7258	130.287	1.33169	0.56389	K-Wm
1612	2759	188.486	234.857	30109.3	1.24602	735.651	0.802558	6	139.065	1075.94	152.526	195.846	1.19626	0.69879	K-Wm
1617	2770	82.8008	143.7	7732.76	1.73549	381.54	0.576205	6	72.1247	276.327	98.6658	99.2504	1.22427	0.667182	K-Wm
1619	2772	175.243	274.797	30263.2	1.56809	795.266	0.637718	6	150.334	1081.44	108.558	196.346	1.28991	0.601006	K-Wm
1620	2773	78.61	135.101	7356.89	1.71863	356.399	0.581859	6	67.3723	262.895	74.9566	96.8082	1.17245	0.727461	K-Wm
1621	2774	110.016	165.287	11513.9	1.50239	455.991	0.665606	6	86.1987	411.444	67.0433	121.109	1.19909	0.695503	K-Wm
1622	2775	99.183	133.511	8223.21	1.34611	395.05	0.742882	6	74.6787	293.853	103.484	102.35	1.22924	0.661798	K-Wm
1624	2777	125.307	180.619	17300.6	1.44141	560.978	0.693764	6	106.045	618.228	100.784	148.455	1.20343	0.69049	K-Wm
1627	2783	124.993	272.713	22234.4	2.18182	747.162	0.458333	6	141.24	794.537	96.0288	168.298	1.41386	0.500248	K-Wm
1628	2784	89.4515	139.18	9457.21	1.55592	387.232	0.642705	6	73.2008	337.949	72.1197	109.761	1.12356	0.792154	K-Wm
1632	2791	83.7258	121.539	7493.21	1.45163	321.166	0.68888	6	60.712	267.767	120.964	97.701	1.04689	0.912425	K-Wm
1633	2792	250.423	430.948	61245.5	1.72088	1271.98	0.581098	6	240.45	2188.58	97.9893	279.32	1.45027	0.475447	K-Wm
1634	2793	131.636	176.742	12670.2	1.34266	522.153	0.744789	6	98.7057	452.763	165.214	127.045	1.30892	0.583681	K-Wm
1635	2794	139.255	247.727	19347.9	1.77895	732.403	0.562129	6	138.45	691.389	108.646	156.994	1.48572	0.453026	K-Wm
1636	2795	82.1808	104.01	6169.95	1.26562	308.01	0.790127	6	58.225	220.481	145.008	88.6556	1.10644	0.816847	K-Wm
1637	2796	121.605	189.901	13249.7	1.56161	513.109	0.640364	6	96.9961	473.473	119.358	129.918	1.2578	0.632086	K-Wm
1638	2797	66.5592	146.633	6580.18	2.20305	372.177	0.453917	6	70.3548	235.14	66.0375	91.5555	1.2946	0.596663	K-Wm
1641	2802	84.4395	114.615	6898.07	1.35736	333.453	0.736723	6	63.0345	246.5	90.699	93.7409	1.13286	0.7792	K-Wm
1642	2803	122.547	156.177	12790.1	1.27442	484.095	0.784668	6	91.5113	457.051	67.2863	127.645	1.20781	0.685496	K-Wm
1646	2809	124.782	306.724	21245	2.45807	752.022	0.406823	6	301.664	2554.47	91.9522	164.511	1.45582	0.47183	K-Wm
1647	2810	135.675	272.012	23959.6	2.00487	730.966	0.498785	6	138.179	856.185	60.0538	174.705	1.33249	0.563215	K-Wm
1648	2811	96.9956	156.601	8924.25	1.61452	405.623	0.61938	6	76.6773	318.904	96.4573	106.623	1.21155	0.681265	K-Wm
1654	2826	150.614	256.797	23979.8	1.70501	715.568	0.586507	6	135.268	856.91	70.3462	174.779	1.30387	0.588212	K-Wm
1655	2827	74.0422	179.993	8830.44	2.43096	433.21	0.411361	6	81.8922	315.552	88.743	106.061	1.3008	0.590984	K-Wm
1656	2828	110.077	333.562	19959.2	3.03027	819.87	0.330004	6	154.985	713.233	87.1976	159.454	1.63749	0.372943	K-Wm
1660	2835	144.833	193.186	18279	1.33386	613.073	0.749706	6	115.893	653.192	26.5644	152.595	1.2795	0.610826	K-Wm
1668	2850	159.06	224.756	24166.4	1.41302	722.293	0.707702	6	136.539	863.575	157.698	175.457	1.31103	0.581801	K-Wm
1673	2860	73.9285	194.965	8699.88	2.63721	460.155	0.379189	6	86.9859	310.886	78.6023	105.274	1.39204	0.516052	K-Wm
1675	2862	92.4479	234.301	12790.6	2.53441	581.354	0.394569	6	109.897	457.066	84.8279	127.647	1.45044	0.475334	K-Wm
1676	2863	137.252	208.204	19322.6	1.51694	608.341	0.65922	6	114.998	690.486	143.515	156.891	1.23486	0.655785	K-Wm
1677	2864	64.1688	166.57	7025.2	2.59582	394.317	0.385235	6	74.5401	251.042	109.234	94.6007	1.32746	0.567489	K-Wm
1678	2872	73.8702	153.277	7259.94	2.07495	379.054	0.48194	6	71.6547	259.431	77.5484	96.1682	1.25528	0.634631	K-Wm
1681	2875	123.13	151.563	12342.6	1.23092	465.764	0.812402	6	88.046	441.057	141.862	125.392	1.18295	0.714603	K-Wm
1682	2876	153.57	314.77	30331.1	2.04968	808.854	0.48788	6	152.902	1083.87	91.9193	196.566	1.31048	0.582288	K-Wm
1683	2877	153.805	200.998	15537.6	1.30683	651.318	0.765208	6	208.372	991.354	90.1595	140.688	1.47437	0.460031	K-Wm
1684	2878	152.792	190.362	19364.4	1.24589	578.632	0.802641	6	109.382	691.979	151.451	157.061	1.17329	0.726423	K-Wm
1687	2894	270.568	391.92	50844.5	1.44851	1183.92	0.690363	6	223.804	1816.91	110.556	254.5	1.48152	0.455603	K-Wm
1692	2903	82.4946	112.37	6856.17	1.36216	323.358	0.73413	6	61.1263	245.002	44.5058	93.4557	1.10191	0.823576	K-Wm
1697	2910	187.113	215.487	23619.5	1.15164	793.126	0.868326	6	149.929	844.033	16.488	173.461	1.45617	0.471603	K-Wm
1701	2914	136.469	248.526	18326.5	1.82111	722.386	0.549115	6	136.557	654.888	84.6171	152.793	1.50569	0.441092	K-Wm
1705	2922	67.7008	133.819	6979.56	1.97663	338.197	0.505913	6	63.9313	249.411	78.7226	94.2929	1.14225	0.766441	K-Wm
1710	2928	94.1286	322.385	19039.2	3.42494	787.95	0.291976	6	148.951	680.357	84.6305	155.736	1.61131	0.385159	K-Wm
1712	2937	77.7417	108.771	6521.76	1.39913	310.133	0.714729	6	58.6264	233.052	86.1317	91.1481	1.08361	0.851642	K-Wm
1716	2945	81.5806	254.861	12498	3.12404	622.523	0.320098	6	117.679	446.61	73.2866	126.178	1.57123	0.405059	K-Wm
1719	2948	104.228	252.147	17073.5	2.41919	619.731	0.413362	6	117.151	610.115	72.6395	147.478	1.33828	0.558349	K-Wm
1720	2949	119.554	198.956	14101.1	1.66415	530.341	0.600906	6	100.254	503.898	126.87	134.027	1.26018	0.629698	K-Wm
1729	2972	70.5155	146.034	8146.17	2.07095	393.112	0.482869	6	74.3123	291.1	95.1944	101.869	1.22898	0.662081	K-Wm
1732	2979	73.3474	140.042	6543.92	1.9093	348.463	0.523752	6	65.872	233.844	78.2022	91.3028	1.21547	0.676885	K-Wm
1734	2981	106.732	258.935	21374.3	2.42604	639.868	0.412195	6	120.958	763.803	82.0474	165.01	1.23495	0.655695	K-Wm
1735	2982	59.2113	161.965	5928.3	2.73537	367.991	0.365581	6	69.5635	211.845	105.486	86.9021	1.34858	0.549852	K-Wm
1737	2988	151.185	272.384	29911.3	1.80166	762.448	0.555044	6	230.608	1980.52	64.862	195.201	1.24394	0.646255	K-Wm
1739	2990	164.837	189.541	17545.6	1.14987	619.18	0.869663	6	117.047	626.984	40.1009	149.503	1.31898	0.57481	K-Wm
1740	2991	140.797	282.155	18347.1	2.00398	753.512	0.499006	6	142.441	655.627	59.2266	152.879	1.56968	0.405861	K-Wm
1744	2997	67.7311	117.1	6530.52	1.7289	307.658	0.578403	6	58.1584	233.365	86.7171	91.2093	1.07424	0.866563	K-Wm
1746	3003	132.358	238.042	19426.6	1.79847	670.018	0.556029	6	126.657	694.2	52.6517	157.313	1.35642	0.543517	K-Wm
1747	3004	100.562	130.721	10796	1.2999	406.294	0.769291	6	76.8042	385.791	179.37	117.273	1.10335	0.821432	K-Wm
1751	3020	106.114	206.727	12845.7	1.94816	538.068	0.513305	6	101.714	459.036	85.8421	127.922	1.33956	0.55728	K-Wm
1753	3022	104.923	206.303	13666.9	1.96624	565.492	0.508585	6	106.898	488.381	96.207	131.947	1.36489	0.536793	K-Wm
1755	3025	167.639	251.862	27040.8	1.50241	712.944	0.665598	6	134.772	966.291	59.5217	185.599	1.22335	0.668186	K-Wm
1756	3026	182.856	668.284	67670.3	3.65471	1729.51	0.27362	6	326.939	2418.17	84.3671	293.605	1.87598	0.284148	K-Wm
1757	3027	77.8974	153.102	8205.93	1.96543	403.382	0.508795	6	76.2536	293.235	84.2706	102.242	1.25649	0.633411	K-Wm
1762	3035	240.85	767.904	87469.2	3.1883	1930.86	0.313647	6	365.003	3125.67	100.66	333.805	1.84217	0.294674	K-Wm
1763	3036	114.907	295.58	21547.2	2.57234	749.574	0.388751	6	141.696	769.981	94.3725	165.676	1.44087	0.481672	K-Wm
1767	3043	78.6956	131.902	6000.52	1.6761	346.016	0.596622	6	65.4094	214.426	77.8979	87.4298	1.26039	0.629487	K-Wm
1768	3044	145.482	282.673	24940.8	1.94301	759.874	0.514667	6	143.643	891.248	94.0856	178.246	1.35766	0.542521	K-Wm
1769	3045	111.46	165.651	13712.2	1.48619	465.349	0.672859	6	87.9677	490	87.2664	132.166	1.12132	0.795315	K-Wm
1770	3053	109.822	157.245	11462.3	1.43182	448.242	0.698412	6	84.7338	409.6	84.3085	120.837	1.18136	0.716533	K-Wm
1776	3061	131.757	275.317	26137.6	2.08958	702	0.478565	6	194.659	1454.82	109.479	182.473	1.22521	0.666164	K-Wm
1777	3062	133.31	207.368	17642.1	1.55553	572.064	0.642866	6	108.141	630.431	111.038	149.913	1.21528	0.677095	K-Wm
1782	3071	77.7193	149.945	8319	1.92932	369.919	0.518318	6	69.928	297.276	97.9884	102.944	1.1444	0.763567	K-Wm
1783	3072	146.105	237.398	19933.7	1.62484	639.497	0.615444	6	120.888	712.321	106.157	159.352	1.27806	0.61221	K-Wm
1788	3082	108.255	194.71	13438.3	1.79863	514.572	0.555977	6	97.2726	480.212	102.095	130.839	1.2525	0.637444	K-Wm
1790	3084	185.537	318.703	28298.3	1.71773	909.241	0.582164	6	171.879	1011.23	141.053	189.865	1.52512	0.429925	K-Wm
1791	3089	167.253	447.054	43199.1	2.67293	1081.55	0.374122	6	204.452	1543.7	75.1753	234.586	1.4683	0.463841	K-Wm
1792	3090	169.656	238.25	22678.9	1.40432	711.139	0.71209	6	134.431	810.422	0.00586269	169.972	1.33244	0.563252	K-Wm
1793	3091	190.998	249.391	32453	1.30572	831.583	0.765858	6	157.199	1159.69	13.7691	203.326	1.30252	0.589431	K-Wm
1794	3092	175.779	213.862	24666.9	1.21665	705.089	0.821926	6	133.287	881.46	70.4156	177.265	1.26675	0.623183	K-Wm
1796	3094	111.08	250.146	17472.5	2.25195	624.629	0.44406	6	118.077	624.372	98.7082	149.191	1.33337	0.562471	K-Wm
1797	3099	81.098	213.021	12141.2	2.62671	532.26	0.380704	6	100.616	433.862	63.4662	124.365	1.363	0.538277	K-Wm
1799	3101	74.1335	153.107	7980.5	2.06528	387.561	0.484196	6	73.263	285.18	68.7768	100.828	1.22414	0.667327	K-Wm
1801	3103	115.11	260.268	18388.4	2.26104	645.051	0.442275	6	121.938	657.102	73.7403	153.051	1.34223	0.555067	K-Wm
1802	3104	157.691	446.157	38206.6	2.8293	1111.9	0.353444	6	210.19	1365.3	63.786	220.615	1.6051	0.388144	K-Wm
1806	3112	133.965	200.157	18641.5	1.4941	583.96	0.6693	6	110.389	666.145	28.6406	154.101	1.20684	0.686601	K-Wm
1808	3116	96.378	300.579	15215	3.11875	713.499	0.320641	6	134.877	543.703	85.1009	139.22	1.63216	0.375385	K-Wm
1809	3117	72.6085	136.141	7218.42	1.875	350.01	0.533333	6	66.1645	257.947	65.3319	95.8929	1.16242	0.740066	K-Wm
1811	3119	124.15	194.244	13644.6	1.56459	562.011	0.639147	6	106.24	487.584	144.602	131.84	1.35759	0.542576	K-Wm
1817	3129	110.383	214.82	14249.5	1.94612	555.134	0.513842	6	104.94	509.201	71.539	134.73	1.31221	0.580757	K-Wm
1818	3137	141.275	219.459	19613.1	1.55342	631.134	0.64374	6	119.307	700.866	153.435	158.066	1.27161	0.618432	K-Wm
1819	3138	107.545	175.541	11201.5	1.63226	489.284	0.612649	6	92.4923	400.281	107.729	119.455	1.30445	0.587684	K-Wm
1823	3144	93.8114	146.313	8194.23	1.55965	404.813	0.64117	6	76.5242	292.817	125.883	102.169	1.26184	0.628042	K-Wm
1827	3148	124.837	292.951	22781	2.34667	750.591	0.426136	6	141.889	814.068	80.6754	170.354	1.40321	0.507873	K-Wm
1829	3150	206.885	553.122	69753.6	2.67357	1468.3	0.374031	6	277.561	2492.62	96.0803	298.091	1.56869	0.406375	K-Wm
1833	3167	147.421	163.721	14021	1.11056	536.379	0.900444	6	101.395	501.033	63.3295	133.645	1.27817	0.612102	K-Wm
1837	3171	105.995	153.587	11918.6	1.449	432.976	0.690131	6	81.848	425.906	89.8078	123.219	1.11907	0.798522	K-Wm
1838	3172	66.0082	159.572	7170.72	2.41745	400.798	0.413659	6	75.7652	256.243	79.3332	95.5755	1.33552	0.560663	K-Wm
1841	3182	115.922	172.7	13079.5	1.4898	483.947	0.671233	6	91.4834	467.391	63.4349	129.081	1.19401	0.701432	K-Wm
1842	3183	94.2217	247.81	13664.8	2.63008	581.256	0.380217	6	109.878	488.308	80.5377	131.937	1.40304	0.507996	K-Wm
1843	3184	92.1533	147.352	8979.81	1.59899	369.659	0.625394	6	69.8788	320.89	84.1641	106.954	1.10071	0.825381	K-Wm
1846	3187	190.617	203.923	23244.1	1.0698	716.786	0.934752	6	135.498	830.616	173.734	172.076	1.3266	0.568228	K-Wm
1847	3193	95.7925	142.833	8285.41	1.49107	392.356	0.67066	6	74.1695	296.076	179.872	102.736	1.21627	0.675992	K-Wm
1849	3195	116.954	179.655	12906.4	1.53612	491.496	0.650992	6	92.9105	461.203	67.8981	128.223	1.22074	0.671047	K-Wm
1852	3207	171.176	376.804	41502.3	2.20127	1019.81	0.454283	6	192.781	1483.07	86.6281	229.933	1.4125	0.501212	K-Wm
1855	3210	83.2018	155.469	8720.5	1.86858	390.977	0.535166	6	73.9087	311.624	123.022	105.399	1.18137	0.716521	K-Wm
1858	3216	100.655	165.951	11001.6	1.64872	459.976	0.606531	6	86.9519	393.138	51.2104	118.384	1.23741	0.653095	K-Wm
1859	3223	88.9443	186.202	11385.1	2.09346	448.417	0.477677	6	84.7669	406.842	85.7911	120.43	1.18582	0.711154	K-Wm
1861	3225	190.939	350.28	36242.9	1.83451	1020.52	0.545103	6	192.916	1295.12	79.8121	214.87	1.51258	0.437085	K-Wm
1863	3227	124.48	214.737	17207.8	1.72507	582.736	0.579687	6	110.158	614.913	101.326	148.057	1.25347	0.63646	K-Wm
1864	3236	101.191	126.186	9091.84	1.247	372.888	0.801922	6	70.4893	324.893	57.1118	107.62	1.10346	0.821267	K-Wm
1865	3237	82.9693	207.995	11250.1	2.5069	515.553	0.3989	6	97.4581	402.019	104.436	119.714	1.37151	0.531619	K-Wm
1868	3240	120.02	305.461	21132.7	2.54508	770.661	0.392915	6	145.683	755.169	118.43	164.075	1.49586	0.446908	K-Wm
1870	3246	89.9606	124.797	8298.21	1.38724	356.524	0.720854	6	67.3958	296.533	90	102.815	1.10434	0.819969	K-Wm
1873	3249	145.586	355.314	33295.7	2.44057	892.362	0.409741	6	168.688	1189.81	92.8948	205.949	1.37991	0.525165	K-Wm
1876	3252	107.258	178.212	11112.9	1.66152	486.689	0.601858	6	92.0017	397.115	62.098	118.981	1.3027	0.589269	K-Wm
1877	3258	68.0771	116.182	6302.61	1.70662	310.078	0.585954	6	58.6159	225.221	97.1973	89.6036	1.10209	0.823319	K-Wm
1879	3260	273.572	615.482	99183.4	2.2498	1709.26	0.444485	6	323.111	3544.28	91.5303	355.455	1.53142	0.426396	K-Wm
1881	3267	210.818	235.8	32919.3	1.1185	884.583	0.894054	6	167.218	1176.36	149.374	204.781	1.37568	0.528401	K-Wm
1883	3269	103.217	147.505	9078.09	1.42908	405.277	0.699752	6	76.6118	324.402	57.9283	107.538	1.20022	0.694194	K-Wm
1884	3270	116.922	293.377	22510	2.50916	722.956	0.398539	6	136.665	804.387	106.687	169.338	1.35966	0.540931	K-Wm
1885	3277	87.0957	149.552	8405.42	1.71709	423.531	0.582379	6	80.0625	300.364	120.952	103.477	1.3035	0.588544	K-Wm
1890	3285	139.633	142.887	15117	1.02331	500.755	0.977225	6	94.6608	540.198	99.101	138.771	1.14921	0.757186	K-Wm
1891	3286	89.6261	165.612	11281.2	1.84781	436.146	0.541182	6	82.4472	403.127	71.5651	119.879	1.15867	0.744868	K-Wm
1894	3292	106.822	188.644	13042.7	1.76597	516.428	0.56626	6	97.6234	466.074	105.95	128.899	1.27594	0.614238	K-Wm
1899	3302	199.09	243.216	30989.9	1.22164	803.056	0.818572	6	151.806	1107.41	83.8355	198.69	1.28718	0.603557	K-Wm
1900	3303	95.4484	174.833	11926.3	1.83171	457.165	0.545939	6	86.4205	426.182	90	123.259	1.1812	0.716723	K-Wm
1902	3305	134.54	342.602	26294.4	2.54648	831.975	0.3927	6	157.273	939.619	73.427	183.019	1.44772	0.477125	K-Wm
1903	3306	128.102	180.149	14094.2	1.40629	518.595	0.71109	6	309.282	2685.01	78.8323	133.994	1.23257	0.658224	K-Wm
1904	3307	91.091	266.652	12260.2	2.92731	609.101	0.34161	6	115.142	438.112	81.573	124.972	1.5522	0.415056	K-Wm
1905	3308	109.893	150.361	10948.6	1.36825	450.812	0.730861	6	85.2196	391.242	65.5654	118.098	1.21569	0.676638	K-Wm
1906	3313	173.474	314.945	24962.2	1.81552	880.594	0.550807	6	166.464	892.012	107.131	178.323	1.57268	0.404315	K-Wm
1907	3314	129.16	228.396	16689.5	1.76832	597.248	0.565508	6	112.901	596.394	61.1431	145.81	1.30448	0.587658	K-Wm
1909	3316	166.055	313.614	24504.5	1.88862	934.277	0.529488	6	176.612	875.658	136.042	176.68	1.68406	0.352602	K-Wm
1910	3317	105.224	191.654	12851.2	1.82139	545.281	0.549033	6	103.078	459.234	130.483	127.949	1.35723	0.542867	K-Wm
1912	3319	79.15	110.358	6073.61	1.39429	314.325	0.717213	6	59.4187	217.038	100.721	87.9607	1.13805	0.77211	K-Wm
1914	3326	63.6452	123.409	5765.62	1.93901	328.655	0.515728	6	62.1276	206.032	135.083	85.7014	1.2213	0.670431	K-Wm
1915	3327	237.14	364.749	55121.3	1.53811	1194.53	0.650147	6	225.808	1969.74	98.331	264.987	1.43563	0.485196	K-Wm
1916	3328	75.9544	126.823	6250.56	1.66973	323.881	0.598901	6	61.2252	223.361	85.9144	89.2328	1.15593	0.748405	K-Wm
1917	3329	123.514	142.686	14234.3	1.15523	458.889	0.86563	6	86.7465	508.655	86.3932	134.658	1.08529	0.849002	K-Wm
1920	3335	154.751	213.6	18921.3	1.38028	632.983	0.72449	6	119.656	676.144	145.491	155.253	1.29844	0.59314	K-Wm
1922	3337	151.188	256.614	21899.6	1.69732	737.051	0.589164	6	139.329	782.574	106.517	167.026	1.40535	0.506327	K-Wm
1923	3338	164.867	407.415	37293.7	2.47118	1029.7	0.404665	6	194.65	1332.68	102.59	217.963	1.50452	0.441779	K-Wm
1926	3341	109.15	191.021	15002.9	1.75008	502.607	0.571401	6	95.0108	536.124	55.0457	138.246	1.15783	0.745948	K-Wm
1927	3342	210.977	414.442	63803.9	1.96439	1162.47	0.509064	6	219.749	2280.01	85.883	285.095	1.29856	0.593025	K-Wm
1933	3353	98.0442	177.604	10022.3	1.81147	448.992	0.552037	6	84.8756	358.143	123.968	112.992	1.26549	0.624426	K-Wm
1934	3354	119.042	304.438	22898.7	2.55741	782.705	0.391021	6	147.959	818.276	123.727	170.793	1.45948	0.469466	K-Wm
1935	3355	149.317	305.488	34248.1	2.0459	862.406	0.488782	6	163.026	1223.84	72.9877	208.874	1.31492	0.578366	K-Wm
1940	3364	79.8174	143.531	7860.17	1.79825	398.621	0.556097	6	75.3536	280.88	117.777	100.065	1.26867	0.621301	K-Wm
1941	3365	163.018	377.431	42654.3	2.31528	931.422	0.431914	6	176.072	1524.24	131.371	233.102	1.27254	0.617533	K-Wm
1942	3371	101.42	124.045	8781.9	1.22308	372.119	0.81761	6	70.3439	313.817	170.943	105.769	1.12045	0.796552	K-Wm
1945	3374	161.987	278.687	29531.5	1.72042	748.262	0.581253	6	141.448	1055.29	100.305	193.958	1.22862	0.662471	K-Wm
1946	3380	93.0858	149.853	9101.49	1.60984	397.554	0.621181	6	75.1519	325.238	106.024	107.677	1.17583	0.723287	K-Wm
1948	3382	100.976	121.763	8285.94	1.20586	392.431	0.829284	6	74.1836	296.094	34.992	102.739	1.21646	0.675778	K-Wm
1951	3385	72.2984	196.069	10553.5	2.71195	456.736	0.368739	6	86.3395	377.124	53.774	115.948	1.25451	0.635411	K-Wm
1955	3390	172.862	183.942	22046.6	1.0641	646.402	0.939761	6	122.193	787.825	50.3231	167.585	1.22839	0.662712	K-Wm
1959	3401	124.561	182.314	14410.8	1.46365	513.032	0.683223	6	96.9815	514.964	128.747	135.491	1.20588	0.687684	K-Wm
1961	3403	98.5421	176.118	10849.1	1.78724	467.521	0.559523	6	88.3783	387.688	102.428	117.561	1.26651	0.62342	K-Wm
1962	3404	116.232	218.162	16959	1.87695	581.058	0.532779	6	109.841	606.022	83.3213	146.982	1.259	0.630885	K-Wm
1963	3405	161.053	244.486	22789.3	1.51804	746.422	0.658742	6	141.101	814.365	66.6646	170.385	1.39516	0.513749	K-Wm
1964	3406	126.888	219.768	17125.1	1.73198	572.029	0.577373	6	108.134	611.959	119.968	147.701	1.23341	0.657335	K-Wm
1969	3416	130.047	235.684	19041.6	1.8123	615.716	0.551784	6	116.392	680.444	68.1224	155.746	1.25902	0.630859	K-Wm
1970	3417	95.102	198.511	11845.7	2.08735	500.852	0.479076	6	94.679	423.3	108.031	122.841	1.29848	0.593104	K-Wm
1972	3419	134.57	430.87	33936.7	3.20184	983.57	0.31232	6	185.93	1212.71	113.246	207.922	1.50652	0.440604	K-Wm
1975	3433	135.499	220.453	15825.4	1.62697	638.322	0.614639	6	120.666	565.514	133.951	141.985	1.43175	0.487826	K-Wm
1978	3436	204.096	317.134	35132.5	1.55385	938.676	0.643564	6	349.052	3590.54	48.8685	211.553	1.41308	0.500803	K-Wm
1979	3442	130.597	330.452	24747.8	2.53031	822.058	0.395208	6	155.399	884.352	94.4993	177.555	1.47448	0.459961	K-Wm
1980	3443	75.2507	155.556	8020.81	2.06717	406.472	0.483754	6	76.8379	286.62	93.8618	101.082	1.28064	0.609741	K-Wm
1981	3444	109.072	227.535	17036.7	2.0861	630.475	0.479364	6	119.182	608.801	89.937	147.319	1.36295	0.53832	K-Wm
1983	3446	110.179	138.456	9327.05	1.25665	467.444	0.795767	6	88.3638	333.298	135	109.003	1.36572	0.536135	K-Wm
1987	3456	75.7673	147.941	7467.02	1.95257	414.387	0.512144	6	78.3341	266.831	5.58324	97.5301	1.35313	0.546165	K-Wm
1994	3464	101.228	134.748	9043.14	1.33114	383.515	0.751237	6	72.4981	323.153	49.286	107.331	1.13796	0.772227	K-Wm
1995	3465	88.7395	155.886	8275.89	1.75667	412.803	0.569259	6	78.0346	295.736	117.717	102.677	1.28039	0.609984	K-Wm
1997	3467	99.2342	258.839	15566.3	2.60836	623.368	0.383383	6	117.839	556.256	59.5586	140.818	1.4098	0.503138	K-Wm
1998	3474	281.256	443.464	74248.2	1.57673	1303.05	0.634225	6	246.323	2653.23	72.8463	307.545	1.34934	0.549231	K-Wm
1999	3475	170.553	329.933	28874.3	1.93449	914.595	0.516931	6	172.891	1031.81	83.3547	191.788	1.51872	0.433554	K-Wm
2000	3476	163.866	324.06	27589.1	1.97759	846.012	0.505666	6	159.927	985.885	71.5651	187.471	1.43719	0.484144	K-Wm
2002	3483	92.9237	193.249	12579.6	2.07965	504.076	0.48085	6	95.2884	449.526	86.2537	126.59	1.26814	0.621819	K-Wm
2008	3494	75.7608	153.057	7905.07	2.02027	409.78	0.494983	6	77.4631	282.484	110.578	100.35	1.30048	0.591281	K-Wm
2009	3495	200.946	332.519	42111.7	1.65477	991.188	0.604315	6	187.37	1504.84	139.627	231.615	1.36289	0.538369	K-Wm
2010	3496	105.961	198.353	13202.8	1.87194	524.275	0.534204	6	99.1069	471.798	94.7753	129.688	1.28745	0.603307	K-Wm
2011	3497	126.053	156.39	14219.8	1.24066	488.524	0.806021	6	92.3486	508.14	24.5002	134.59	1.15596	0.748363	K-Wm
2012	3506	105.611	209.619	13331.2	1.98481	551.409	0.503826	6	104.236	476.384	148.736	130.316	1.34755	0.550693	K-Wm
2014	3508	81.2044	114.553	7115.76	1.41068	328.954	0.708878	6	62.1842	254.279	92.6365	95.2085	1.10035	0.825923	K-Wm
2017	3511	151.648	252.552	22786.4	1.66538	760.417	0.600464	6	143.746	814.262	133.683	170.374	1.42141	0.49495	K-Wm
2019	3516	88.5183	132.663	8186.05	1.49871	364.482	0.667242	6	68.9001	292.525	81.164	102.118	1.13669	0.773951	K-Wm
2021	3518	76.7131	165.523	8653.81	2.15769	417.082	0.463459	6	78.8434	309.24	86.2998	104.995	1.26509	0.62482	K-Wm
2023	3520	157.208	248.721	26191.7	1.58212	708.7	0.632065	6	133.97	935.95	126.617	182.662	1.23562	0.654981	K-Wm
2025	3522	151.645	235.658	26716.7	1.55401	661.357	0.643496	6	125.02	954.711	74.0028	184.483	1.14169	0.767185	K-Wm
2026	3527	126.524	201.631	16213.3	1.59362	561.149	0.6275	6	106.077	579.374	50.9074	143.714	1.24351	0.6467	K-Wm
2030	3531	155.463	500.756	48141	3.22106	1262.16	0.310457	6	238.594	1720.3	72.6085	247.641	1.62317	0.379554	K-Wm
2031	3532	57.6429	151.863	6182.75	2.63455	361.502	0.379571	6	68.3369	220.938	120.964	88.7475	1.29725	0.594223	K-Wm
2035	3542	66.4644	153.279	7764.74	2.30618	371.656	0.433618	6	70.2564	277.47	90.6572	99.4555	1.1901	0.706047	K-Wm
2040	3547	107.42	137.619	10751.5	1.28113	420.833	0.780562	6	79.5526	384.202	85.7851	117.031	1.1452	0.762501	K-Wm
2045	3560	127.862	191.231	14824.3	1.4956	544.823	0.668628	6	102.991	529.738	33.0239	137.421	1.26262	0.627266	K-Wm
2048	3563	108.465	322.382	19433.2	2.97222	765.298	0.336449	6	144.669	694.438	80.1823	157.339	1.54904	0.416748	K-Wm
2054	3576	133.278	213.851	16477.2	1.60455	601.518	0.623229	6	113.708	588.805	76.7595	144.879	1.32225	0.571973	K-Wm
2055	3577	144.999	196.443	15820	1.35479	634.478	0.738121	6	119.939	565.322	110.988	141.961	1.42337	0.493587	K-Wm
2056	3578	52.8027	141.226	5719.08	2.67461	338.254	0.373887	6	63.9422	204.369	103.712	85.3548	1.26208	0.627812	K-Wm
2057	3579	54.7411	145.404	5597.85	2.65621	336.184	0.376476	6	63.5509	200.037	117.957	84.4454	1.26786	0.622095	K-Wm
2058	3580	198.762	241.748	33906.3	1.21627	801.542	0.822186	6	151.52	1211.63	9.17746	207.829	1.22826	0.662852	K-Wm
2065	3594	129.866	174.486	13516.6	1.34359	538.332	0.744276	6	101.764	483.011	4.45846	131.22	1.30654	0.585811	K-Wm
2072	3603	96.3044	174.999	9648.16	1.81715	456.559	0.550314	6	86.306	344.773	80.1342	110.863	1.31153	0.581355	K-Wm
2073	3604	108.264	152.523	12007.5	1.40881	443.293	0.709817	6	83.7983	429.084	82.1205	123.678	1.14148	0.767471	K-Wm
2075	3609	163.59	203.172	23955.5	1.24196	658.421	0.805181	6	124.465	856.038	102.263	174.69	1.20035	0.694043	K-Wm
2077	3611	69.016	144.193	7937.41	2.08928	368.071	0.478634	6	69.5786	283.64	70.0956	100.555	1.16573	0.735878	K-Wm
2078	3612	111.664	146.48	9933.68	1.31179	437.861	0.762315	6	82.7714	354.976	79.6952	112.492	1.23961	0.65077	K-Wm
2081	3622	83.1997	120.832	7014.33	1.45231	342.226	0.688556	6	64.693	250.654	27.2085	94.5275	1.15299	0.75223	K-Wm
2082	3623	69.5563	196.014	9372.52	2.81805	468.156	0.354855	6	88.4983	334.923	69.9879	109.268	1.36448	0.537112	K-Wm
2084	3625	95.22	132.394	9511.03	1.3904	415.859	0.719218	6	78.6122	339.873	0	110.073	1.2032	0.690757	K-Wm
2085	3626	217.07	433.781	48547	1.99834	1216.28	0.500414	6	229.922	1734.81	131.867	248.683	1.55761	0.412175	K-Wm
2092	3644	98.1821	187.547	10782.6	1.91019	480.018	0.523507	6	90.7406	385.312	96.4666	117.2	1.30437	0.587758	K-Wm
2094	3652	82.0367	201.47	9927.12	2.45585	482.246	0.407191	6	91.1618	354.742	92.1211	112.455	1.36572	0.536137	K-Wm
2098	3659	104.153	122.853	9870.49	1.17954	372.871	0.84779	6	70.486	352.718	7.46854	112.133	1.059	0.891683	K-Wm
2100	3661	167.179	430.722	44122.7	2.57641	1159.09	0.388137	6	219.11	1576.71	86.1423	237.081	1.55702	0.412491	K-Wm
2109	3681	64.7063	132.603	6120.83	2.0493	322.736	0.487971	6	61.0087	218.725	156.038	88.3019	1.16399	0.738082	K-Wm
2110	3682	155.905	215.572	17612.8	1.38272	625.013	0.723214	6	118.15	629.386	34.2157	149.789	1.32886	0.566291	K-Wm
2112	3690	170.111	262.182	28263.5	1.54124	769.738	0.648829	6	145.508	1009.98	49.6355	189.748	1.29192	0.599141	K-Wm
2114	3692	153.635	170.199	19937	1.10781	619.36	0.902679	6	117.081	712.44	3.90761	159.366	1.23771	0.652775	K-Wm
2115	3693	144.266	241.59	19824.1	1.67462	666.836	0.597149	6	126.056	708.407	100.796	158.914	1.33637	0.559945	K-Wm
2116	3700	153.986	281.938	27045.3	1.83093	748.606	0.54617	6	141.513	966.451	65.1677	185.614	1.28444	0.606142	K-Wm
2123	3713	89.3646	120.567	7866.61	1.34916	359.211	0.741202	6	67.9037	281.11	64.3124	100.106	1.14278	0.765735	K-Wm
2124	3714	134.261	227.818	17619.8	1.69682	625.792	0.589336	6	118.297	629.638	36.7132	149.819	1.33025	0.565108	K-Wm
2125	3715	85.406	159.052	9431.07	1.86231	409.195	0.536969	6	77.3526	337.015	93.9208	109.609	1.18893	0.707439	K-Wm
2126	3716	84.3742	163.515	9965.79	1.93798	440.812	0.516001	6	83.3292	356.123	92.2026	112.673	1.24596	0.644162	K-Wm
2127	3717	144.202	194.813	18214.7	1.35097	640.315	0.74021	6	121.043	650.894	33.6792	152.327	1.33871	0.557987	K-Wm
2128	3718	125.492	205.352	14140.7	1.63638	589.893	0.611106	6	111.511	505.312	58.6096	134.215	1.39972	0.510405	K-Wm
2131	3727	84.5302	169.982	8426.8	2.0109	446.667	0.497289	6	84.4361	301.128	105.78	103.609	1.37296	0.530498	K-Wm
2132	3728	63.8925	132.176	5674.95	2.06872	325.645	0.483391	6	61.5586	202.792	104.339	85.0249	1.21974	0.672146	K-Wm
2145	3743	191.602	329.541	41237	1.71992	956.34	0.581422	6	180.783	1473.59	92.1605	229.197	1.32884	0.566307	K-Wm
2148	3748	82.9706	141.558	8097.32	1.70612	369.01	0.586125	6	69.7561	289.354	67.6704	101.563	1.1571	0.746888	K-Wm
2149	3749	143.411	321.734	25998.5	2.24345	790.133	0.445743	6	149.363	929.047	66.0375	181.987	1.38271	0.523044	K-Wm
2152	3754	82.3466	349.199	21255	4.2406	783.735	0.235816	6	148.154	759.54	69.444	164.549	1.51685	0.434623	K-Wm
2157	3761	66.1874	172.349	7421.38	2.60396	416.929	0.38403	6	78.8145	265.2	98.0231	97.2316	1.3656	0.53623	K-Wm
2158	3762	130.024	162.23	15003.8	1.24769	482.659	0.80148	6	91.2399	536.153	44.42	138.25	1.11185	0.808926	K-Wm
2160	3764	195.552	354.657	39552.7	1.81362	1018.03	0.551383	6	192.445	1413.4	102.065	224.467	1.44437	0.479337	K-Wm
2161	3765	126.217	199.767	14015.5	1.58273	545.562	0.631822	6	103.131	500.84	86.6863	133.62	1.3003	0.59144	K-Wm
2162	3769	115.766	172.074	14858.8	1.4864	498.49	0.672768	6	94.2326	530.972	169.407	137.58	1.15391	0.751033	K-Wm
2165	3772	127.606	218.805	19506.1	1.71469	621.266	0.583197	6	117.442	697.043	81.0274	157.634	1.25515	0.634755	K-Wm
2166	3773	95.3577	174.826	11636.5	1.83337	448.677	0.545444	6	84.816	415.825	89.4891	121.752	1.17362	0.726014	K-Wm
2168	3781	182.849	257.625	25764.4	1.40895	751.145	0.709751	6	141.993	920.68	96.3402	181.165	1.32044	0.573538	K-Wm
2176	3798	114.337	352.406	23185.3	3.08218	836.64	0.324446	6	219.928	1093.43	73.5013	171.859	1.55038	0.41603	K-Wm
2177	3799	90.4958	229.37	14359.5	2.53459	576.957	0.394541	6	109.066	513.129	114.113	135.249	1.35856	0.541803	K-Wm
2178	3800	369.512	443.703	88846.9	1.20078	1873.34	0.83279	6	354.128	3174.91	113.189	336.424	1.77337	0.31798	K-Wm
2184	3811	91.4232	154.501	9225.63	1.68995	412.056	0.591732	6	77.8935	329.674	120.909	108.408	1.2105	0.682452	K-Wm
2185	3812	144.681	172.611	12773.5	1.19304	612.23	0.838192	6	115.733	456.455	115.346	127.562	1.5285	0.428026	K-Wm
2186	3813	130.647	183.514	17086	1.40466	529.664	0.711916	6	100.126	610.562	20.7875	147.532	1.14337	0.764943	K-Wm
2187	3814	130.915	283.874	20448	2.16839	721.434	0.461172	6	136.377	730.7	46.2955	161.395	1.42356	0.493455	K-Wm
2189	3820	153.542	397.746	32653.8	2.59048	1080.01	0.38603	6	204.16	1166.87	116.379	203.954	1.68642	0.351617	K-Wm
2193	3824	169.445	230.397	19840.8	1.35971	751.438	0.735449	6	142.049	709.003	110.323	158.981	1.50528	0.441329	K-Wm
2198	3830	77.1414	134.221	6730.48	1.73993	344.632	0.574735	6	65.1478	240.511	66.9072	92.5951	1.18533	0.711746	K-Wm
2204	3842	123.791	326.205	24013.2	2.63514	830.8	0.379487	6	157.051	858.103	71.5651	174.9	1.51278	0.436966	K-Wm
2208	3846	206.036	287.788	43169.3	1.39678	874.776	0.71593	6	165.364	1542.64	142.648	234.505	1.18799	0.708551	K-Wm
2210	3848	104.542	144.502	10880.9	1.38225	414.509	0.723461	6	78.3571	388.823	54.4377	117.733	1.12126	0.795399	K-Wm
2218	3861	63.9606	125.689	6527.34	1.9651	329.999	0.508879	6	62.3817	233.252	110.186	91.1871	1.15252	0.752834	K-Wm
2220	3863	88.179	120.636	7433.42	1.36808	340.436	0.730952	6	64.3546	265.63	138.202	97.3104	1.11416	0.805579	K-Wm
2221	3867	134.895	208.685	17026.7	1.54702	606.489	0.646403	6	114.648	608.441	64.0871	147.275	1.31148	0.581398	K-Wm
2222	3868	97.7482	129.067	8866.94	1.32041	367.724	0.757343	6	69.513	316.857	126.984	106.28	1.10189	0.823606	K-Wm
2224	3870	88.3075	118.711	7182.89	1.34429	334.643	0.743889	6	63.2595	256.678	138.814	95.6566	1.11413	0.805612	K-Wm
2225	3871	97.1419	153.834	10820	1.5836	432.324	0.631474	6	81.7248	386.648	79.992	117.403	1.17274	0.727106	K-Wm
2230	3882	96.0538	166.824	11053.8	1.73677	465.754	0.57578	6	88.0443	395.004	94.0755	118.665	1.24999	0.640013	K-Wm
2233	3889	69.1768	165.222	7985.96	2.3884	409.084	0.41869	6	77.3315	285.375	86.0733	100.862	1.29168	0.599366	K-Wm
2234	3890	102.052	139.593	10993	1.36786	433.023	0.731067	6	81.8568	392.829	80.6155	118.338	1.16536	0.736348	K-Wm
2238	3898	89.5486	239.125	12939.8	2.67034	587.304	0.374484	6	111.021	462.398	73.6015	128.389	1.45681	0.471185	K-Wm
2239	3899	76.5987	117.489	6428.89	1.53383	320.185	0.651964	6	60.5266	229.734	123.228	90.4968	1.12678	0.78763	K-Wm
2251	3918	101.236	132.498	7708.12	1.3088	399.062	0.764059	6	75.437	275.446	63.5631	99.0922	1.28254	0.607936	K-Wm
2252	3919	143.708	188.205	16823.6	1.30963	557.324	0.763572	6	105.354	601.183	131.991	146.394	1.21242	0.680288	K-Wm
2255	3926	74.2867	142.299	6446.99	1.91554	351.08	0.522047	6	66.3667	230.381	88.6629	90.6241	1.23376	0.656955	K-Wm
2257	3928	93.7273	190.552	10656.5	2.03305	473.383	0.491871	6	89.4863	380.804	81.4868	116.512	1.29393	0.59728	K-Wm
2258	3929	69.7727	159.509	7370.55	2.28612	399.319	0.437423	6	75.4855	263.383	139.387	96.898	1.31243	0.580564	K-Wm
2260	3931	206.446	344.225	45050.6	1.66738	993.325	0.599743	6	187.774	1609.86	90.0109	239.561	1.32052	0.573466	K-Wm
2261	3932	160.972	365.016	40095.5	2.26758	1006.36	0.440999	6	353.37	3020.86	69.5237	226.002	1.41811	0.497258	K-Wm
2263	3934	142.557	211.87	19849.4	1.48621	592.695	0.672853	6	112.041	709.311	41.4152	159.015	1.18703	0.7097	K-Wm
2266	3937	98.2314	145.862	10351.1	1.48488	417.96	0.673454	6	79.0095	369.893	84.6275	114.831	1.15917	0.744229	K-Wm
2268	3947	87.2312	227.734	13978.6	2.6107	597.476	0.38304	6	112.945	499.519	90.0242	133.443	1.42592	0.491826	K-Wm
2271	3950	146.33	156.779	16037.5	1.07141	544.867	0.933349	6	102.999	573.095	16.9142	142.934	1.21402	0.678496	K-Wm
2275	3963	86.4329	164.381	10859.7	1.90183	443.453	0.525809	6	83.8286	388.068	80.6045	117.618	1.20072	0.693606	K-Wm
2276	3964	105.836	175.643	10835.6	1.65959	500.881	0.60256	6	94.6845	387.204	156.075	117.487	1.35773	0.542466	K-Wm
2277	3965	73.9927	108.174	6176.86	1.46195	296.657	0.684018	6	56.0788	220.727	43.612	88.7052	1.06506	0.881553	K-Wm
2281	3973	95.5041	124.856	8434.04	1.30734	383.933	0.764915	6	72.5771	301.387	148.392	103.653	1.17962	0.718645	K-Wm
2282	3974	92.6864	158.112	11155.1	1.70588	437.946	0.586207	6	82.7875	398.622	104.931	119.207	1.17001	0.730501	K-Wm
2286	3988	88.0918	102.565	6465.09	1.16429	301.8	0.858889	6	57.0511	231.027	127.589	90.7513	1.0591	0.891507	K-Wm
2287	3989	83.5522	163.386	9710.43	1.95549	424.451	0.51138	6	80.2364	346.998	85.9104	111.22	1.21538	0.676977	K-Wm
2288	3990	111.447	239.61	17787.5	2.15	619.79	0.465116	6	117.163	635.63	20.556	150.53	1.31127	0.581589	K-Wm
2293	4005	151.104	479.419	39257.3	3.17277	1163.22	0.315182	6	219.891	1402.84	93.5402	223.628	1.65656	0.364405	K-Wm
2294	4006	97.2705	216.859	15034.5	2.22945	550.774	0.448542	6	104.116	537.251	75.2761	138.392	1.26746	0.622488	K-Wm
2295	4007	140.49	275.361	20309.2	1.96	707.785	0.510204	6	133.797	725.742	33.1785	160.847	1.40139	0.509191	K-Wm
2296	4008	84.9228	143.017	8807.66	1.68408	414.142	0.593796	6	78.2876	314.738	179.753	105.924	1.24516	0.64499	K-Wm
2297	4009	115.084	209.816	16485.1	1.82316	543.117	0.548499	6	102.669	589.089	96.3402	144.914	1.19358	0.701933	K-Wm
2300	4015	81.6575	116.299	6225.69	1.42422	306.467	0.702137	6	57.9332	222.472	53.8991	89.0551	1.09596	0.832551	K-Wm
2301	4016	111.564	190.681	15038.9	1.70916	497.38	0.585082	6	94.0227	537.409	56.3886	138.412	1.14442	0.763535	K-Wm
2308	4028	107.001	177.106	11780.9	1.65517	504.073	0.604167	6	95.2879	420.986	54.4623	122.505	1.31042	0.582346	K-Wm
2309	4029	172.951	254.328	23793.6	1.47052	773.408	0.680033	6	146.202	850.253	45.3396	174.098	1.41476	0.49961	K-Wm
2310	4030	134.955	302.228	22080.5	2.23948	797.548	0.446532	6	173.666	1288.23	93.042	167.714	1.51446	0.435998	K-Wm
2316	4043	161.053	249.619	19448.1	1.54992	785.035	0.645195	6	148.4	694.969	8.42139	157.4	1.58839	0.396358	K-Wm
2320	4054	77.2048	170.731	7906.73	2.21141	413.091	0.4522	6	78.089	282.544	107.263	100.361	1.31085	0.581963	K-Wm
2321	4055	146.87	385.369	31843.1	2.62387	1028.59	0.381116	6	194.441	1137.9	53.3579	201.406	1.62645	0.378022	K-Wm
2322	4056	171.731	301.998	38351	1.75855	869.922	0.56865	6	164.446	1370.46	66.8014	221.031	1.25342	0.636511	K-Wm
2323	4057	114.223	220.551	13544.7	1.93088	567.381	0.5179	6	107.255	484.014	95.7106	131.356	1.37561	0.528457	K-Wm
2326	4060	139.684	148.839	16276.2	1.06554	493.935	0.93849	6	93.3715	581.622	75.8754	143.993	1.09244	0.837918	K-Wm
2335	4079	88.5958	354.535	22349.8	4.00171	835.541	0.249893	6	157.947	798.662	90.0951	168.734	1.57702	0.402095	K-Wm
2336	4080	96.9868	149.237	9043.41	1.53873	425.983	0.649885	6	80.5261	323.163	51.7331	107.333	1.26395	0.625947	K-Wm
2337	4081	96.8013	156.917	10021.9	1.62102	424.584	0.616894	6	80.2616	358.129	133.818	112.99	1.19672	0.698254	K-Wm
2339	4083	136.38	182.169	15829.5	1.33575	541.706	0.748642	6	102.402	565.659	70.5231	142.003	1.21489	0.677529	K-Wm
2341	4089	102.101	130.03	9001.02	1.27354	380.27	0.785213	6	71.8846	321.648	114.47	107.081	1.13097	0.781804	K-Wm
2342	4090	130.902	264.406	24919.2	2.01988	683.975	0.495079	6	129.296	890.477	95.4403	178.169	1.22258	0.669026	K-Wm
2346	4102	152.265	276.074	22112.7	1.81312	758.898	0.551536	6	143.459	790.187	74.6063	167.836	1.44002	0.482241	K-Wm
2351	4107	187.536	360.016	45106.2	1.91971	978.849	0.520912	6	185.038	1611.85	89.0536	239.708	1.30048	0.591281	K-Wm
2355	4113	93.2921	166.387	8577.67	1.78351	450.163	0.560692	6	85.0971	306.519	84.0866	104.532	1.37148	0.531641	K-Wm
2356	4114	120.763	278.169	23259.9	2.30343	762.263	0.434135	6	144.095	831.184	74.3004	172.135	1.41028	0.502792	K-Wm
2359	4121	81.7609	117.166	6075.82	1.43303	330.085	0.697822	6	62.3979	217.117	78.8815	87.9767	1.19489	0.700396	K-Wm
2374	4152	104.38	338.844	24758.3	3.24627	802.05	0.308046	6	151.616	884.726	76.373	177.593	1.43829	0.4834	K-Wm
2379	4159	84.4964	225.227	13332	2.66552	540.523	0.375161	6	102.178	476.412	81.2538	130.32	1.32091	0.573133	K-Wm
2384	4168	163.75	262.98	26504.4	1.60599	742.534	0.62267	6	140.366	947.125	10.1247	183.749	1.28695	0.603776	K-Wm
2388	4176	137.13	397.786	34055.1	2.9008	985.003	0.344733	6	186.201	1216.94	96.8948	208.284	1.50609	0.440855	K-Wm
2389	4177	158.964	212.483	22067.4	1.33667	678.219	0.748126	6	128.208	788.569	71.4638	167.664	1.28825	0.602561	K-Wm
2390	4178	105.366	160.773	10737.2	1.52585	495.059	0.65537	6	93.5839	383.688	76.5764	116.953	1.34809	0.550257	K-Wm
2392	4180	86.9003	148.908	8867.79	1.71355	436.484	0.583583	6	82.5111	316.887	71.8747	106.285	1.30787	0.584614	K-Wm
2395	4193	133.55	287.698	22396.2	2.15423	753.408	0.464204	6	142.421	800.32	85.2364	168.909	1.42052	0.495569	K-Wm
2397	4195	105.002	142.871	8363.77	1.36066	402.247	0.73494	6	76.0391	298.876	77.4712	103.221	1.24107	0.649242	K-Wm
2402	4208	151.018	333.427	32296.1	2.20786	854.345	0.452928	6	161.502	1154.09	106.732	202.834	1.34142	0.555741	K-Wm
2405	4211	90.2388	198.923	12921.3	2.20441	531.498	0.453637	6	100.472	461.739	69.2228	128.298	1.31933	0.574507	K-Wm
2406	4218	152.024	193.606	17845.8	1.27352	601.11	0.785226	6	113.631	637.711	166.53	150.776	1.26967	0.620322	K-Wm
2408	4220	128.458	206.114	18017	1.60453	606.9	0.623237	6	181.011	1225.09	99.8658	151.498	1.2758	0.614381	K-Wm
2412	4232	100.375	172.277	13420.1	1.71633	480.79	0.582637	6	90.8866	479.561	171.969	130.75	1.17107	0.729178	K-Wm
2413	4233	206.299	251.257	31560.8	1.21793	801.707	0.821068	6	151.551	1127.81	67.1005	200.512	1.27335	0.616746	K-Wm
2416	4236	94.9084	102.077	6437.68	1.07553	351.245	0.929773	6	66.398	230.048	161.154	90.5586	1.23524	0.655387	K-Wm
2417	4237	56.138	129.376	5645.29	2.30461	307.098	0.433913	6	58.0526	201.732	84.6217	84.8024	1.15329	0.751832	K-Wm
2418	4238	116.331	192.359	15085.3	1.65355	519.07	0.604759	6	98.1228	539.066	100.65	138.625	1.19249	0.70322	K-Wm
2419	4239	134.972	216.568	17724.4	1.60454	661.58	0.623231	6	125.062	633.372	30.0686	150.262	1.40218	0.508622	K-Wm
2423	4250	156.523	286.436	28734.7	1.82999	828.292	0.54645	6	156.577	1026.82	85.3645	191.324	1.37875	0.526052	K-Wm
2424	4251	150.952	290.512	30130.8	1.92453	810.508	0.519609	6	153.215	1076.71	73.1103	195.916	1.31752	0.576085	K-Wm
2425	4252	91.9725	125.685	8918.98	1.36655	369.576	0.731769	6	69.8631	318.716	78.4314	106.592	1.10421	0.820159	K-Wm
2427	4260	117.136	136.646	11201.1	1.16656	424.158	0.857224	6	80.1811	400.267	47.9041	119.453	1.13084	0.781981	K-Wm
2428	4261	120.656	180.882	15526.8	1.49915	536.455	0.667043	6	101.409	554.845	82.5691	140.639	1.21478	0.677652	K-Wm
2430	4263	113.1	128.544	9751.96	1.13656	424.86	0.879852	6	80.3137	348.482	175.84	111.458	1.21396	0.678564	K-Wm
2431	4264	146.736	277.871	25298.2	1.89368	775.244	0.528071	6	146.549	904.02	74.3888	179.519	1.37531	0.528691	K-Wm
2436	4276	116.572	164.144	10974	1.4081	470.036	0.710179	6	88.8536	392.15	89.7234	118.235	1.26606	0.623867	K-Wm
2437	4277	168.25	282.417	23817.8	1.67856	797.12	0.595749	6	150.684	851.119	57.0963	174.187	1.4574	0.470808	K-Wm
2440	4280	102.684	169.042	10358.4	1.64624	481.54	0.607444	6	282.149	2460.62	16.5723	114.871	1.33503	0.561071	K-Wm
2441	4290	141.487	188.642	16249.6	1.33328	600.698	0.750028	6	113.554	580.672	66.5615	143.875	1.32966	0.565612	K-Wm
2444	4297	79.0015	153.615	8821.85	1.94446	406.828	0.514281	6	76.9051	315.245	82.2238	106.01	1.22218	0.669464	K-Wm
2445	4298	88.3449	336.767	20424	3.81195	806.458	0.262333	6	152.449	729.843	74.8844	161.3	1.59227	0.394427	K-Wm
2447	4300	109.288	220.545	13819.2	2.01803	572.54	0.495533	6	108.231	493.824	72.1213	132.68	1.37426	0.529495	K-Wm
2448	4301	113.294	287.747	23092.9	2.53983	720.22	0.393727	6	136.147	825.213	74.0668	171.516	1.33731	0.559161	K-Wm
2453	4311	195.311	273.79	26256.7	1.40182	788.844	0.71336	6	149.12	938.273	148.671	182.888	1.37365	0.529965	K-Wm
2455	4319	134.435	197.748	17559.3	1.47096	603.733	0.679829	6	114.127	627.473	72.646	149.561	1.28557	0.605071	K-Wm
2461	4325	120.141	155.606	10781.3	1.29519	452.929	0.772087	6	85.6198	385.266	78.5299	117.193	1.23083	0.660089	K-Wm
2462	4326	76.6931	134.869	5919.8	1.75855	351.193	0.56865	6	66.3881	211.542	78.8252	86.8398	1.28795	0.602844	K-Wm
2466	4330	207.609	328.237	38438	1.58104	1014.78	0.632496	6	191.83	1373.57	74.3997	221.282	1.46048	0.468821	K-Wm
2468	4336	118.657	138.417	11768.3	1.16653	429.939	0.857242	6	81.274	420.534	84.8056	122.439	1.11829	0.799628	K-Wm
2478	4351	131.995	202.304	17659.6	1.53267	565.501	0.652458	6	106.9	631.06	78.6901	149.988	1.20074	0.693593	K-Wm
2488	4371	94.7652	131.198	7771.49	1.38446	388.753	0.722305	6	73.4883	277.711	171.396	99.4987	1.2443	0.645872	K-Wm
2493	4381	124.005	161.407	14511.3	1.30162	481.368	0.768274	6	90.9959	518.556	173.956	135.962	1.12753	0.786578	K-Wm
2494	4382	142.99	185.832	16061.6	1.29962	546.145	0.769455	6	103.241	573.954	142.039	143.041	1.21596	0.676336	K-Wm
2497	4385	106.735	181.374	12726.2	1.69929	539.923	0.588482	6	102.065	454.764	85.3733	127.325	1.35048	0.548306	K-Wm
2498	4391	165.046	262.087	26354.8	1.58797	779.878	0.629736	6	147.425	941.776	34.3827	183.229	1.35551	0.544245	K-Wm
2501	4394	100.95	144.365	8455	1.43007	419.136	0.699266	6	79.2317	302.136	80.534	103.782	1.28618	0.604496	K-Wm
2503	4396	110.658	171.366	13871	1.54862	479.227	0.645737	6	90.5911	495.673	110.222	132.929	1.14814	0.758601	K-Wm
2504	4397	92.8274	207.942	11384	2.2401	507.677	0.446409	6	95.9691	406.802	89.2414	120.424	1.3426	0.554766	K-Wm
2508	4401	148.287	220.383	15890.2	1.4862	689.639	0.672859	6	130.367	567.829	96.9112	142.275	1.5437	0.419638	K-Wm
2510	4408	141.591	234.919	24933.1	1.65914	644.975	0.602724	6	121.924	890.974	83.577	178.219	1.15255	0.752801	K-Wm
2511	4409	157.221	283.863	26668.4	1.8055	826.719	0.553863	6	156.279	952.984	83.8298	184.316	1.42845	0.490085	K-Wm
2515	4417	125.52	260.237	19657	2.07326	694.081	0.482332	6	131.206	702.436	104.98	158.243	1.39687	0.512493	K-Wm
2520	4427	89.3172	145.715	9839	1.63144	425.306	0.612956	6	80.3982	351.592	93.0201	111.954	1.20985	0.683182	K-Wm
2521	4428	214.861	511.245	68400.1	2.37943	1318.45	0.42027	6	249.235	2444.25	76.8274	295.185	1.42247	0.494216	K-Wm
2523	4431	74.8721	137.574	6575.07	1.83745	361.698	0.544232	6	68.374	234.957	77.0798	91.5199	1.25864	0.631244	K-Wm
2524	4432	70.5055	122.925	5657.37	1.74348	322.889	0.573564	6	61.0377	202.164	76.9689	84.8931	1.2113	0.681549	K-Wm
2533	4447	89.237	139.089	8251.05	1.55865	373.874	0.641582	6	70.6757	294.848	152.12	102.523	1.16138	0.741392	K-Wm
2534	4448	69.9333	165.546	7423.85	2.3672	404.65	0.422441	6	76.4935	265.288	118.072	97.2478	1.32517	0.569454	K-Wm
2535	4449	137.667	457.279	40731.9	3.32164	1121.43	0.301056	6	211.99	1455.54	90.0114	227.789	1.56787	0.406799	K-Wm
2537	4458	70.7652	115.973	6294.28	1.63884	321.537	0.61019	6	60.7821	224.923	83.1549	89.5443	1.14357	0.764667	K-Wm
2538	4459	155.713	473.794	39793.5	3.04273	1251.54	0.328652	6	236.586	1422	102.966	225.15	1.77028	0.319091	K-Wm
2539	4460	132.533	232.876	21756.8	1.75712	622.979	0.569112	6	117.765	777.469	90	166.48	1.19174	0.704104	K-Wm
2544	4472	88.9045	273.129	15737.7	3.07216	674.761	0.325503	6	127.554	562.38	85.0303	141.591	1.51769	0.434142	K-Wm
2550	4478	104.197	148.883	9280.93	1.42886	437.757	0.699857	6	82.7518	331.65	108.435	108.733	1.28216	0.608295	K-Wm
2551	4479	221.425	297.298	38153.3	1.34266	945.644	0.744792	6	178.761	1363.39	56.6593	220.461	1.36605	0.535879	K-Wm
2556	4489	123.952	383.674	30141.4	3.09535	926.139	0.323065	6	244.95	1862.65	103.496	195.951	1.50522	0.441368	K-Wm
2557	4490	77.2052	158.174	9041.03	2.04875	403.227	0.488103	6	76.2243	323.077	86.6096	107.318	1.19659	0.698408	K-Wm
2564	4497	99.8953	137.359	10053.5	1.37503	401.087	0.727255	6	75.8199	359.256	96.3402	113.168	1.12872	0.784923	K-Wm
2572	4511	140.01	273.899	29584.6	1.95628	732.784	0.511175	6	138.522	1057.19	76.9864	194.132	1.20212	0.691995	K-Wm
2575	4514	55.2656	208.717	8272.18	3.77662	460.533	0.264787	6	87.0573	295.603	99.544	102.654	1.42875	0.489878	K-Wm
2584	4532	103.941	178.329	11249.6	1.71567	470.389	0.582862	6	88.9204	401.998	35.5221	119.711	1.2514	0.638573	K-Wm
2590	4540	106.19	175.386	10374.8	1.65163	484.576	0.605464	6	91.6023	370.741	71.3754	114.962	1.34238	0.554942	K-Wm
2591	4541	61.7331	126.314	5918.25	2.04613	327.858	0.488727	6	61.9769	211.486	24.6207	86.8284	1.20253	0.691531	K-Wm
2593	4543	83.0131	89.0414	6034.6	1.07262	302.486	0.932298	6	57.1807	215.644	39.4615	87.6777	1.09872	0.828377	K-Wm
2594	4547	80.7459	105.035	6373.35	1.30081	308.39	0.768754	6	58.2967	227.749	69.4654	90.105	1.08999	0.841701	K-Wm
2595	4548	89.8863	175.386	10005.1	1.9512	498.948	0.512505	6	94.319	357.527	73.2664	112.895	1.40751	0.504777	K-Wm
2596	4549	118.246	247.782	18982.3	2.09549	640.943	0.477216	6	121.161	678.323	73.6302	155.503	1.31265	0.580362	K-Wm
2606	4571	93.8487	209.198	12576.8	2.2291	530.867	0.448612	6	100.353	449.428	70.8043	126.576	1.33569	0.560519	K-Wm
2616	4592	87.052	209.38	11540.2	2.40523	547.669	0.415761	6	103.529	412.383	75.4655	121.247	1.43853	0.483242	K-Wm
2618	4597	99.686	128.838	7539.48	1.29244	391.374	0.77373	6	73.9838	269.42	107.968	98.0022	1.27182	0.618224	K-Wm
2627	4614	120.35	324.219	20660.2	2.69397	775.185	0.371199	6	146.538	738.282	81.5517	162.23	1.52175	0.43183	K-Wm
2628	4615	131.548	147.427	13432.5	1.12071	470.236	0.892291	6	88.8916	480.004	120.964	130.811	1.14484	0.76298	K-Wm
2629	4616	150.979	333.719	27959.5	2.21037	901.479	0.452414	6	170.412	999.121	105.482	188.725	1.52123	0.432123	K-Wm
2631	4618	162.616	215.688	20787	1.32636	597.837	0.753941	6	113.013	742.815	84.5135	162.728	1.17002	0.730493	K-Wm
2634	4627	126.89	238.083	19360.9	1.8763	628.154	0.532965	6	118.744	691.852	82.2894	157.046	1.27382	0.616285	K-Wm
2636	4629	132.737	194.014	16504	1.46164	563.036	0.684165	6	106.434	589.762	109.354	144.997	1.23665	0.653891	K-Wm
2641	4634	108.209	229.86	15343.7	2.12423	619.067	0.47076	6	117.026	548.3	88.0908	139.807	1.41019	0.502856	K-Wm
2643	4637	88.6608	175.649	11081.2	1.98113	449.783	0.504762	6	85.0252	395.981	71.5651	118.811	1.20563	0.687968	K-Wm
2644	4638	180.225	287.782	27677	1.59679	810.869	0.626255	6	238.606	1677.02	93.0376	187.769	1.3753	0.528698	K-Wm
2658	4665	102.961	121.532	8263.56	1.18037	369.585	0.84719	6	69.8648	295.295	8.74616	102.6	1.14719	0.759852	K-Wm
2659	4666	113.753	202.414	14345.9	1.77941	536.997	0.561983	6	101.512	512.644	108.435	135.185	1.26507	0.624846	K-Wm
2666	4675	57.0432	145.988	6225.18	2.55924	348.536	0.39074	6	65.8858	222.454	128.196	89.0515	1.24645	0.643646	K-Wm
2668	4677	88.3862	104.044	6748.66	1.17715	345.845	0.849509	6	65.3772	241.161	83.5269	92.7201	1.18789	0.70867	K-Wm
2669	4678	83.3331	227.561	11530.6	2.73074	537.351	0.366201	6	101.579	412.04	90.1137	121.197	1.41201	0.501562	K-Wm
2672	4684	80.3286	162.034	9663.65	2.01714	411.144	0.495752	6	77.721	345.327	85.63	110.952	1.18013	0.71803	K-Wm
2674	4686	105.509	194.579	14097.3	1.8442	519.535	0.542241	6	146.66	746.378	128.193	134.009	1.23468	0.655986	K-Wm
2675	4687	114.322	200.389	15315.1	1.75285	608.65	0.5705	6	115.057	547.278	120.25	139.677	1.38776	0.519247	K-Wm
2678	4694	138.73	225.283	19517.6	1.62389	681.603	0.615805	6	128.847	697.454	113.45	157.681	1.37665	0.52766	K-Wm
2679	4695	80.9739	115.53	6818.81	1.42676	332.95	0.700889	6	185.455	1453.98	128.626	93.2008	1.13771	0.772574	K-Wm
2681	4705	90.0952	169.327	10519.5	1.87942	435.891	0.532079	6	82.3991	375.909	89.8721	115.761	1.19918	0.69539	K-Wm
2682	4706	87.084	181.633	13124.6	2.08572	482.71	0.47945	6	91.2495	469.003	87.3974	129.303	1.18891	0.707463	K-Wm
2686	4715	87.6274	186.354	11327.7	2.12667	482.215	0.470219	6	91.1559	404.79	96.3402	120.126	1.27842	0.611857	K-Wm
2689	4718	114.333	349.571	24624	3.05749	875.472	0.327066	6	328.292	2127.3	112.006	177.111	1.57423	0.403519	K-Wm
2691	4722	90.0119	264.507	19538.3	2.93858	630.047	0.340301	6	119.102	698.194	94.7032	157.764	1.27185	0.618203	K-Wm
2692	4723	138.034	352.98	27233.5	2.55719	849.855	0.391054	6	160.653	973.177	95.5841	186.259	1.45311	0.473591	K-Wm
2693	4724	147.746	199.274	19681.6	1.34876	591.166	0.74142	6	111.752	703.315	20.556	158.342	1.18901	0.707345	K-Wm
2700	4733	106.619	170.425	12322.1	1.59845	462.465	0.625607	6	87.4224	440.324	85.4486	125.287	1.17555	0.72363	K-Wm
2707	4750	135.617	196.728	16392.5	1.45061	566.575	0.689366	6	107.103	585.778	41.0897	144.506	1.24865	0.641385	K-Wm
2708	4751	96.3963	157.729	9809.41	1.63625	431.824	0.611153	6	81.6302	350.535	105.475	111.786	1.23024	0.660722	K-Wm
2710	4753	74.3147	159.036	8352.24	2.14004	409.378	0.467281	6	77.3871	298.464	90.0044	103.149	1.26394	0.625956	K-Wm
2715	4758	196.938	378.02	47646.9	1.91948	1093.34	0.520973	6	206.68	1702.64	106.595	246.367	1.41332	0.500629	K-Wm
2718	4765	93.3006	128.424	7660.94	1.37646	364.87	0.726502	6	68.9736	273.761	84.9592	98.7885	1.17626	0.722761	K-Wm
2719	4766	71.6563	175.846	7919.11	2.45402	429.996	0.407495	6	343.843	3331.68	69.1202	100.439	1.36343	0.537944	K-Wm
2722	4773	163.209	219.502	22319.6	1.34491	681.221	0.743544	6	128.775	797.58	103.195	168.62	1.28662	0.604087	K-Wm
2724	4775	99.6892	205.953	14729.7	2.06595	537.731	0.484039	6	101.651	526.359	102.816	136.981	1.25018	0.639812	K-Wm
2727	4783	128.089	302.162	20365.8	2.35899	779.227	0.423909	6	147.302	727.765	58.6863	161.071	1.5407	0.421273	K-Wm
2731	4791	96.866	126.514	9418.01	1.30607	387.688	0.765656	6	73.2869	336.549	84.7025	109.533	1.12722	0.787019	K-Wm
2732	4792	129.133	245.66	21553.4	1.90238	649.348	0.525659	6	122.75	770.202	113.637	165.7	1.24803	0.642023	K-Wm
2734	4794	145.398	177.005	18820.2	1.21738	606.298	0.821434	6	114.612	672.534	2.57184	154.838	1.24704	0.643046	K-Wm
2736	4803	115.779	363.991	22145.2	3.14385	870.834	0.318081	6	164.619	791.348	109.351	167.959	1.65121	0.366773	K-Wm
2740	4807	120.951	224.619	13190.9	1.8571	619.955	0.538473	6	205.449	1405.98	114.626	129.629	1.5231	0.431065	K-Wm
2742	4815	133.67	221.283	19107.6	1.65544	657.43	0.60407	6	124.278	682.801	107.745	156.016	1.342	0.55526	K-Wm
2743	4816	127.276	177.377	14388.7	1.39364	539.666	0.717548	6	102.016	514.175	74.8976	135.387	1.26946	0.620528	K-Wm
2744	4817	186.014	374.137	50081.9	2.01134	1051.3	0.497181	6	198.733	1789.66	99.9886	252.584	1.32554	0.569138	K-Wm
2746	4819	110.2	175.673	11535.6	1.59413	482.785	0.6273	6	91.2638	412.22	108.604	121.223	1.26835	0.621616	K-Wm
2747	4820	103.527	187.366	11592.4	1.80983	496.496	0.552537	6	93.8556	414.251	108.366	121.521	1.30117	0.590654	K-Wm
2750	4834	148.619	269.328	20565.7	1.81221	785.993	0.551813	6	148.581	734.908	110.573	161.859	1.54651	0.418116	K-Wm
2751	4835	74.4986	145.62	7198.16	1.95467	362.303	0.511596	6	68.4883	257.223	96.9458	95.7582	1.20494	0.688758	K-Wm
2756	4849	67.7171	146.234	6717.4	2.15949	368.184	0.463073	6	69.6	240.044	108.919	92.5051	1.26756	0.622388	K-Wm
2758	4851	90.7455	186.56	11988.4	2.05586	467.657	0.486415	6	88.404	428.4	68.0965	123.579	1.20518	0.688486	K-Wm
2764	4869	190.779	277.524	31971.3	1.45469	871.86	0.687433	6	164.813	1142.48	64.0577	201.811	1.37585	0.528271	K-Wm
2765	4870	90.1697	117.053	8563.15	1.29814	351.597	0.770331	6	66.4644	306.001	15.2725	104.444	1.07209	0.870029	K-Wm
2766	4871	97.5704	381.855	20525.6	3.91364	877.061	0.255517	6	165.796	733.474	93.8739	161.701	1.72738	0.33514	K-Wm
2767	4872	93.5149	160.965	9328.14	1.72128	424.174	0.580963	6	80.1842	333.337	45	109.009	1.23923	0.651173	K-Wm
2769	4874	131.233	148.474	12538.1	1.13137	507.334	0.883881	6	95.9044	448.043	3.01279	126.381	1.27845	0.611832	K-Wm
2772	4880	76.5777	187.98	9256.97	2.45476	473.586	0.407371	6	89.5247	330.794	86.0055	108.592	1.3889	0.518395	K-Wm
2777	4885	130.482	209.429	16728.8	1.60504	587.645	0.623036	6	111.086	597.798	108.435	145.982	1.282	0.60845	K-Wm
2778	4886	120.315	219.885	18239.9	1.82758	612.774	0.547172	6	115.836	651.796	83.4395	152.432	1.28025	0.610115	K-Wm
2782	4890	232.924	366.293	46416.9	1.57258	1167.47	0.635896	6	280.14	1964.35	140.572	243.166	1.52902	0.427734	K-Wm
2783	4898	175.09	225.74	29292.7	1.28928	685.956	0.775626	6	129.67	1046.76	90.2594	193.172	1.13089	0.78191	K-Wm
2784	4899	81.6554	86.7451	5629.73	1.06233	281.917	0.941326	6	53.2923	201.176	82.0998	84.6855	1.06019	0.889684	K-Wm
2785	4900	117.183	200.956	14239.2	1.71488	563.854	0.58313	6	106.589	508.831	41.385	134.681	1.33331	0.562523	K-Wm
2791	4909	99.5674	130.158	9025.48	1.30723	404.394	0.764974	6	76.445	322.522	86.6333	107.226	1.20109	0.693186	K-Wm
2793	4911	107.22	172.546	13480.5	1.60927	447.852	0.621401	6	84.6602	481.721	71.1169	131.044	1.0884	0.844164	K-Wm
2795	4913	196.472	421.182	53436.8	2.14372	1121.06	0.466478	6	211.922	1909.54	80.8531	260.907	1.36841	0.534034	K-Wm
2796	4914	68.0399	167.168	8788.02	2.45691	395.508	0.407015	6	74.7653	314.036	62.036	105.806	1.19046	0.705617	K-Wm
2798	4916	121.979	291.298	20872.3	2.38811	690.767	0.418742	6	130.58	745.863	88.259	163.061	1.34912	0.54941	K-Wm
2800	4922	103.289	138.706	9076.09	1.3429	414.668	0.744658	6	78.3871	324.33	140.528	107.526	1.22816	0.662961	K-Wm
2801	4923	179.783	259.553	31537.1	1.4437	760.7	0.692666	6	143.8	1126.96	82.875	200.436	1.20867	0.684517	K-Wm
2804	4932	63.9669	115.85	5933.15	1.8111	324.207	0.552151	6	61.2868	212.019	94.1708	86.9376	1.18764	0.708974	K-Wm
2806	4934	227.265	271.734	38521.9	1.19567	1109.04	0.836351	6	209.648	1376.56	138.029	221.523	1.5944	0.393373	K-Wm
2810	4942	170.436	266.196	25271.6	1.56185	783.643	0.640266	6	148.137	903.07	91.4688	179.424	1.39094	0.516876	K-Wm
2813	4948	104.742	129.076	9477.78	1.23232	385.389	0.811475	6	72.8523	338.684	36.8699	109.88	1.11699	0.80149	K-Wm
2814	4949	93.3017	163.497	10725.8	1.75234	437.371	0.570665	6	82.6788	383.281	44.5577	116.891	1.19163	0.704237	K-Wm
2816	4951	89.2355	145.664	8581.08	1.63235	387.156	0.612613	6	73.1864	306.641	29.7449	104.553	1.17929	0.71905	K-Wm
2818	4953	82.1575	136.393	6338.63	1.66014	373.47	0.602358	6	70.5993	226.508	95.8149	89.8593	1.32362	0.570785	K-Wm
2822	4957	117.346	207.783	14884.9	1.7707	575.332	0.564749	6	108.758	531.907	138.067	137.702	1.33061	0.564807	K-Wm
2824	4964	128.929	142.236	11000.3	1.10321	455.819	0.906446	6	86.1662	393.089	129.806	118.377	1.2263	0.664977	K-Wm
2836	4983	137.979	370.657	30400.1	2.68632	922.015	0.372256	6	174.294	1086.33	97.069	196.79	1.49213	0.449146	K-Wm
2843	4993	126.739	238.232	21792.9	1.8797	623.513	0.532	6	117.866	778.762	109.384	166.618	1.19177	0.704067	K-Wm
2844	4998	123.457	156.17	13635.5	1.26498	480.399	0.790528	6	90.8127	487.258	78.6901	131.795	1.16084	0.742087	K-Wm
2847	5001	72.5253	109.89	5950.59	1.51519	306.117	0.659981	6	57.8671	212.642	112.493	87.0653	1.11973	0.79758	K-Wm
2850	5004	116.43	150.765	11699.7	1.2949	436.002	0.77226	6	82.4201	418.083	141.641	122.082	1.13738	0.773011	K-Wm
2851	5015	147.41	306.522	27220	2.07939	850.606	0.48091	6	160.795	972.695	111.481	186.213	1.45475	0.472521	K-Wm
2853	5023	90.2393	122.202	7603.07	1.3542	337.495	0.738445	6	63.7988	271.692	161.831	98.4146	1.09214	0.838384	K-Wm
2854	5024	126.075	260.031	19306.6	2.06251	682.438	0.484847	6	129.005	689.914	96.4401	156.826	1.38585	0.520677	K-Wm
2858	5031	74.3232	168.846	7586.32	2.27178	423.489	0.440183	6	389.345	3962.73	89.0099	98.3062	1.37193	0.531297	K-Wm
2860	5033	96.5963	142.17	8428.63	1.47179	393.04	0.679443	6	74.2988	301.194	60.9454	103.62	1.20799	0.685287	K-Wm
2861	5034	131.114	200.482	17674.5	1.52907	572.561	0.653992	6	108.235	631.592	166.794	150.051	1.21522	0.677163	K-Wm
2868	5044	96.0034	145.045	10036.5	1.51084	413.967	0.661885	6	78.2546	358.65	51.02	113.072	1.16595	0.735599	K-Wm
2871	5047	94.602	190.81	11391.4	2.01698	476.501	0.49579	6	90.0758	407.067	90.4374	120.463	1.25974	0.630144	K-Wm
2873	5054	95.6311	203.734	11268.1	2.13042	515.367	0.469392	6	97.4229	402.66	115.641	119.809	1.36993	0.532852	K-Wm
2875	5056	79.5889	151.47	8415.07	1.90315	384.094	0.525445	6	72.6075	300.709	90.4355	103.537	1.18144	0.716429	K-Wm
2881	5067	123.69	206.435	16497.3	1.66897	587.088	0.599172	6	110.981	589.523	74.5201	144.968	1.28974	0.601168	K-Wm
2883	5069	78.3909	194.257	9867.25	2.47805	463.636	0.403543	6	87.6438	352.602	79.7556	112.115	1.31699	0.576543	K-Wm
2885	5075	113.332	260.325	18378.5	2.29702	708.465	0.435347	6	133.925	656.749	156.038	153.01	1.47458	0.459901	K-Wm
2886	5076	97.2555	168.327	10754.6	1.73077	455.218	0.577778	6	86.0526	384.31	45	117.047	1.23859	0.651843	K-Wm
2890	5082	177.503	386.107	42685.3	2.17522	1028.09	0.459724	6	194.345	1525.34	73.8495	233.187	1.40409	0.507233	K-Wm
2891	5083	145.227	202.044	19662.9	1.39122	612.926	0.718791	6	115.865	702.645	107.526	158.266	1.23336	0.657387	K-Wm
2892	5084	70.5865	140.604	6768.49	1.99194	349.996	0.502024	6	66.1618	241.869	95.4462	92.8563	1.20039	0.693994	K-Wm
2893	5090	124.609	271.926	23072.3	2.18224	656.678	0.458245	6	124.136	824.479	143.564	171.439	1.21987	0.672009	K-Wm
2894	5097	125.787	273.972	20253.3	2.17807	715.638	0.459123	6	135.281	723.743	109.851	160.625	1.4189	0.496705	K-Wm
2895	5098	150.938	190.448	18455.2	1.26176	603.634	0.792542	6	114.109	659.49	89.9124	153.329	1.25377	0.636153	K-Wm
2897	5100	77.8968	225.318	11820.5	2.89251	548.613	0.34572	6	103.707	422.399	113.16	122.711	1.42382	0.493279	K-Wm
2898	5101	83.3959	224.565	11611.9	2.69276	576.793	0.371367	6	109.035	414.948	104.036	121.623	1.51033	0.438383	K-Wm
2900	5106	120.447	226.349	17372.2	1.87924	587.109	0.53213	6	110.985	620.787	8.1301	148.762	1.25689	0.633003	K-Wm
2904	5112	129.175	185.949	13779.2	1.43951	525.529	0.694679	6	99.3438	492.393	136.695	132.488	1.26325	0.626643	K-Wm
2905	5113	80.8311	158.591	8107.26	1.962	419.007	0.509684	6	79.2074	289.709	106.307	101.625	1.31308	0.57999	K-Wm
2908	5120	111.847	140.332	11259.7	1.25468	449.322	0.797017	6	84.938	402.36	171.184	119.764	1.19481	0.700486	K-Wm
2910	5122	136.214	202.044	15336.8	1.48328	640.673	0.674181	6	121.11	548.054	112.301	139.776	1.45974	0.469301	K-Wm
2911	5123	93.9428	255.852	15452.3	2.72348	630.135	0.367177	6	119.118	552.182	109.654	140.301	1.43035	0.488783	K-Wm
2912	5130	144.611	268.07	31323.8	1.85374	737.55	0.53945	6	139.423	1119.34	112.824	199.757	1.17587	0.723237	K-Wm
2916	5134	159.732	162.605	20560.4	1.01799	593.479	0.982331	6	112.189	734.718	84.6034	161.838	1.16787	0.733179	K-Wm
2920	5141	89.1103	159.212	9365.43	1.78668	419.516	0.559698	6	79.3035	334.67	148.202	109.227	1.22318	0.668377	K-Wm
2921	5142	168.135	406.864	41125.9	2.41987	965.802	0.413245	6	182.571	1469.62	87.9051	228.888	1.3438	0.553769	K-Wm
2925	5146	95.3306	150.861	8490.51	1.5825	401.393	0.63191	6	75.8777	303.405	119.967	104	1.22916	0.661886	K-Wm
2927	5151	78.9529	190.151	10966.9	2.40841	510.516	0.415212	6	249.313	1269.89	84.8737	118.197	1.37554	0.528514	K-Wm
2929	5153	156.434	486.138	39617.3	3.10762	1271.9	0.32179	6	240.434	1415.71	148.027	224.651	1.80308	0.30759	K-Wm
2932	5159	106.628	331.625	23924.5	3.11011	773.163	0.321532	6	146.156	854.933	94.6628	174.577	1.41044	0.502679	K-Wm
2933	5163	193.655	281.262	32541.5	1.45239	863.37	0.688522	6	163.208	1162.86	91.6256	203.603	1.35046	0.548319	K-Wm
2937	5171	125.141	179.12	15909.3	1.43135	519.181	0.698641	6	98.1439	568.51	33.0239	142.361	1.16145	0.741312	K-Wm
2940	5178	89.6093	101.429	6489.43	1.1319	314.074	0.883467	6	59.3713	231.897	56.54	90.9219	1.10011	0.826287	K-Wm
2941	5179	136.986	156.334	14397.6	1.14124	524.753	0.876236	6	167.438	909.55	81.1112	135.429	1.234	0.656705	K-Wm
2943	5186	108.368	157.63	10328.9	1.45458	450.675	0.687482	6	85.1938	369.098	74.1435	114.707	1.25125	0.638727	K-Wm
2944	5187	111.07	238.632	20149.5	2.14849	636.564	0.465442	6	286.389	2050.2	88.9779	160.213	1.26536	0.624554	K-Wm
2947	5199	58.6026	145.908	5836.83	2.48979	354.67	0.40164	6	67.0454	208.577	58.417	86.2291	1.30991	0.582797	K-Wm
2950	5202	81.3122	122.65	6341.93	1.50838	341.003	0.662961	6	64.4618	226.626	43.7445	89.8827	1.20824	0.685008	K-Wm
2954	5209	182.348	282.938	28289.1	1.55163	818.586	0.644482	6	154.742	1010.9	119.026	189.834	1.37328	0.530251	K-Wm
2958	5213	107.732	238.991	16591.9	2.21839	674.186	0.450777	6	127.445	592.906	110.556	145.383	1.47685	0.458487	K-Wm
2959	5214	60.7601	142.075	5800.81	2.3383	342.684	0.427661	6	64.7796	207.29	94.14	85.9626	1.26956	0.620427	K-Wm
2961	5219	369.979	451.415	98236.4	1.22011	1639.95	0.819598	6	310.009	3510.44	52.1696	353.754	1.47638	0.458776	K-Wm
2963	5221	63.4326	151.25	6684.34	2.38443	361.205	0.419388	6	68.2807	238.862	80.7481	92.2772	1.24661	0.64349	K-Wm
2964	5222	107.169	141.549	9288.03	1.32081	445.984	0.757112	6	84.307	331.904	85.66	108.774	1.30576	0.58651	K-Wm
2966	5225	116.322	232.886	18034.5	2.00208	613.282	0.49948	6	115.932	644.457	105.694	151.572	1.28859	0.602246	K-Wm
2973	5238	77.0086	121.599	6283.64	1.57904	326.743	0.633297	6	61.7662	224.543	87.7664	89.4687	1.16307	0.739244	K-Wm
2975	5240	87.1576	176.242	10333.5	2.0221	442.3	0.494535	6	83.6106	369.264	96.7339	114.733	1.22772	0.663443	K-Wm
2977	5248	98.1321	170.397	12005.2	1.7364	449.019	0.575903	6	84.8807	429	48.265	123.666	1.15634	0.747874	K-Wm
2980	5251	89.5052	274.722	16085.2	3.06934	680.375	0.325803	6	128.615	574.797	81.1193	143.146	1.5137	0.436434	K-Wm
2981	5252	163.847	251.331	29359.3	1.53394	720.386	0.651917	6	136.179	1049.14	119.788	193.392	1.18631	0.710566	K-Wm
2982	5259	164.675	227.757	28676.2	1.38307	721.965	0.72303	6	136.477	1024.73	140.091	191.129	1.20299	0.691002	K-Wm
2983	5260	340.663	830.358	143205	2.43747	2843.82	0.410261	6	537.583	5117.36	81.9953	427.114	2.12045	0.222405	K-Wm
2985	5263	97.3956	191.584	13488.8	1.96706	514.855	0.508372	6	97.326	482.015	80.5377	131.084	1.25085	0.639135	K-Wm
2986	5264	226.781	306.79	42057.8	1.35281	1032.5	0.739204	6	195.18	1502.92	84.0115	231.467	1.4206	0.495515	K-Wm
2994	5278	116.972	149.557	11209.1	1.27857	472.081	0.782123	6	89.2404	400.552	150.642	119.495	1.25816	0.631722	K-Wm
2995	5279	90.3074	361.337	21610.9	4.00118	839.371	0.249926	6	158.671	772.256	62.4472	165.921	1.6111	0.38526	K-Wm
2996	5280	76.2527	211.816	12196	2.77781	516.989	0.359996	6	97.7295	435.82	86.0548	124.645	1.32092	0.57312	K-Wm
2998	5282	94.787	180.384	11725.5	1.90304	452.791	0.525474	6	85.5937	419.006	79.2619	122.217	1.17988	0.718332	K-Wm
3001	5285	104.571	175.016	12074.7	1.67365	487.885	0.597496	6	178.405	1067.33	96.8428	124.023	1.25281	0.637132	K-Wm
3002	5286	107.581	231.28	12947.8	2.14982	642.444	0.465154	6	121.445	462.685	87.9417	128.429	1.5931	0.394018	K-Wm
3004	5296	98.5079	212	14032.6	2.15211	572.626	0.46466	6	108.247	501.448	117.724	133.701	1.36398	0.537508	K-Wm
3005	5297	78.8931	109.041	6349.39	1.38214	305.235	0.723518	6	57.7003	226.893	104.991	89.9355	1.08087	0.855961	K-Wm
3006	5298	132.311	144.465	13401.9	1.09186	519.759	0.915865	6	226.856	1542.75	159.444	130.662	1.26685	0.62309	K-Wm
3008	5304	146.173	658.108	53122.6	4.50226	1574.9	0.222111	6	297.712	1898.31	99.5601	260.139	1.92805	0.269008	K-Wm
3009	5305	182.164	218.123	24638.1	1.1974	687.953	0.835141	6	130.048	880.432	100.305	177.161	1.23669	0.653851	K-Wm
3010	5306	96.2072	208.209	13150.2	2.16417	532.19	0.462071	6	100.603	469.918	130.067	129.429	1.3095	0.583162	K-Wm
3011	5307	123.953	150.302	13857.1	1.21258	460.093	0.82469	6	86.9741	495.176	112.866	132.862	1.10285	0.822184	K-Wm
3015	5311	63.5381	132.42	6014.41	2.08411	343.49	0.479822	6	304.77	2951.65	89.9789	87.531	1.24975	0.640259	K-Wm
3016	5312	94.9102	189.208	12432.9	1.99355	468.755	0.501618	6	88.6115	444.285	97.7357	125.85	1.18622	0.710676	K-Wm
3018	5317	79.1241	196.366	10017.8	2.48174	456.677	0.402943	6	86.3283	357.984	117.724	112.967	1.28744	0.603318	K-Wm
3020	5319	150.319	162.021	16384.4	1.07785	577.894	0.92777	6	109.243	585.489	74.1754	144.471	1.27391	0.616202	K-Wm
3022	5326	137.94	227.186	20619.7	1.647	596.882	0.607166	6	112.832	736.835	116.338	162.071	1.17288	0.726932	K-Wm
3024	5328	128.059	190.068	15616.5	1.48423	549.656	0.673752	6	103.905	558.05	87.6723	141.045	1.24109	0.64922	K-Wm
3026	5330	109.975	168.02	12168.9	1.5278	478.867	0.654537	6	90.5231	434.85	111.869	124.506	1.22488	0.666515	K-Wm
3027	5335	58.7243	126	5699.9	2.14563	325.236	0.466064	6	61.4812	203.683	107.135	85.2116	1.21554	0.6768	K-Wm
3029	5337	87.9893	95.491	5782.03	1.08526	305.788	0.921441	6	57.8049	206.618	85.2364	85.8233	1.13471	0.776656	K-Wm
3030	5338	80.9628	129.906	6259.5	1.60451	355.354	0.623243	6	67.1747	223.681	99.3789	89.2966	1.26735	0.622595	K-Wm
3032	5345	106.571	182.162	14462.1	1.70931	512.262	0.585032	6	96.836	516.796	97.8336	135.731	1.20194	0.692206	K-Wm
3033	5346	57.6312	139.962	5979.27	2.42857	346.669	0.411764	6	65.5328	213.667	104.439	87.2749	1.26501	0.624897	K-Wm
3034	5347	140.221	190.335	14188.9	1.35739	569.105	0.73671	6	107.581	507.034	54.751	134.443	1.3481	0.550241	K-Wm
3036	5354	84.3917	165.237	9028.72	1.95798	414.723	0.51073	6	78.3976	322.637	99.4623	107.245	1.23155	0.659324	K-Wm
3037	5355	146.92	227.103	18415.2	1.54576	636.341	0.646931	6	120.291	658.061	70.1606	153.163	1.32314	0.571199	K-Wm
3039	5357	99.4914	200.318	12591.7	2.01342	535.365	0.496667	6	101.203	449.96	67.4677	126.651	1.34621	0.551792	K-Wm
3041	5365	82.9963	152.998	8219.42	1.84343	422.035	0.542468	6	79.7798	293.718	101.31	102.326	1.31351	0.579607	K-Wm
3042	5366	118.438	161.541	12800.9	1.36393	478.18	0.733173	6	90.3931	457.436	95.8736	127.699	1.19255	0.703152	K-Wm
3043	5367	104.24	149.694	10904.5	1.43605	442.95	0.696354	6	83.7334	389.669	143.961	117.861	1.19689	0.698053	K-Wm
3045	5369	93.6172	180.81	10940	1.93137	468.122	0.517766	6	88.492	390.937	87.5999	118.052	1.26286	0.62703	K-Wm
3046	5370	126.434	179.31	14969.3	1.41822	528.795	0.70511	6	99.9613	534.92	91.6992	138.091	1.21953	0.672381	K-Wm
3047	5371	81.8876	101.106	6314.2	1.23469	292.479	0.809917	6	280.558	2261.37	37.1796	89.6859	1.03858	0.92708	K-Wm
3048	5377	83.4288	132.333	8182.22	1.58618	364.016	0.630447	6	68.8122	292.388	112.413	102.094	1.13551	0.775566	K-Wm
3049	5378	115.823	169.268	10665.9	1.46143	491.685	0.684261	6	92.9461	381.142	48.3665	116.564	1.34336	0.554133	K-Wm
3050	5379	174.537	248.819	27727.9	1.4256	713.053	0.701461	6	134.793	990.844	90.7595	187.942	1.20828	0.684955	K-Wm
3051	5380	107.884	137.439	11015.9	1.27395	411.219	0.784958	6	77.7351	393.649	112.62	118.461	1.10552	0.818208	K-Wm
3053	5389	173.982	234.828	22704.3	1.34973	771.5	0.740889	6	145.841	811.328	82.8819	170.067	1.44473	0.479099	K-Wm
3056	5392	220.461	382.56	39425.3	1.73527	1181.18	0.576278	6	223.285	1408.85	130.944	224.106	1.67854	0.354924	K-Wm
3057	5393	86.6646	218.649	12881.2	2.52294	542.75	0.396363	6	102.599	460.303	56.7592	128.098	1.34936	0.549218	K-Wm
3059	5395	111.985	161.102	12969.4	1.4386	501.666	0.695122	6	94.833	463.457	111.801	128.536	1.24297	0.647263	K-Wm
3061	5401	115.521	151.624	11233.8	1.31252	461.332	0.761894	6	87.2084	401.436	87.1238	119.627	1.22816	0.662963	K-Wm
3062	5402	220.847	624.462	68624.3	2.82758	1651.43	0.353659	6	312.179	2452.26	85.4252	295.668	1.77879	0.316045	K-Wm
3063	5403	53.0256	138.701	5658.86	2.61574	328.547	0.382301	6	62.1072	202.217	85.8994	84.9043	1.23236	0.658451	K-Wm
3065	5411	85.1725	224.149	12201	2.63171	538.481	0.379981	6	101.792	435.999	63.5963	124.67	1.37555	0.528501	K-Wm
3068	5421	80.2121	133.204	8134.61	1.66064	357.121	0.602177	6	67.5088	290.687	94.7636	101.797	1.11726	0.801115	K-Wm
3069	5422	91.6172	112.336	7250.13	1.22614	327.751	0.815565	6	61.9567	259.08	85.8243	96.1033	1.08612	0.847712	K-Wm
3071	5424	78.5525	153.364	6942.54	1.95238	381.558	0.512195	6	72.1282	248.089	45	94.0425	1.29213	0.598945	K-Wm
3074	5427	60.2425	153.378	6136.88	2.54601	367.387	0.392772	6	69.4494	219.299	112.451	88.4177	1.32329	0.57107	K-Wm
3075	5428	136.38	377.957	31653	2.77136	939.363	0.360834	6	177.573	1131.11	93.0425	200.804	1.48981	0.450544	K-Wm
3076	5429	155.934	206.179	17417.6	1.32221	659.622	0.756307	6	124.692	622.409	68.3207	148.956	1.41028	0.50279	K-Wm
3077	5434	130.095	154.576	12148.3	1.18818	493.178	0.841623	6	93.2284	434.114	48.4418	124.401	1.26256	0.627332	K-Wm
3080	5437	121.627	147.798	14331.1	1.21517	465.189	0.822928	6	87.9374	512.116	89.6167	135.115	1.09646	0.831784	K-Wm
3081	5438	83.7153	141.093	7611.77	1.68539	384.984	0.593334	6	72.7758	272.004	99.8135	98.4709	1.2451	0.645045	K-Wm
3087	5447	282.002	369.171	50227	1.30911	1258.76	0.763879	6	237.95	1794.84	52.4715	252.95	1.58481	0.398147	K-Wm
3088	5448	89.429	222.469	11883.6	2.48766	542.992	0.401984	6	102.645	424.654	42.1793	123.038	1.40548	0.506231	K-Wm
3089	5449	107.508	216.502	14034.4	2.01382	580.338	0.496568	6	109.705	501.513	105.996	133.709	1.38226	0.523385	K-Wm
3092	5455	58.9205	134.256	7192.22	2.27859	346.509	0.438867	6	65.5027	257.011	87.0452	95.7187	1.15289	0.752355	K-Wm
3095	5458	100.981	178.495	11010.5	1.76761	473.64	0.565737	6	89.535	393.455	82.5266	118.432	1.27365	0.616453	K-Wm
3097	5464	74.0828	152.599	7823.43	2.05984	376.394	0.485475	6	71.152	279.567	74.1116	99.8306	1.20074	0.693588	K-Wm
3098	5465	98.6978	267.265	17424	2.70791	631.76	0.369288	6	119.425	622.64	108.435	148.984	1.35046	0.54832	K-Wm
3107	5478	68.5197	266.332	12825.4	3.88694	633.532	0.257272	6	119.76	458.312	103.241	127.821	1.57848	0.401351	K-Wm
3109	5480	441.8	702.131	138914	1.58925	2512.18	0.629228	6	474.892	4964.05	118.339	420.667	1.90187	0.276463	K-Wm
3111	5485	81.9034	157.007	8620.72	1.91698	440.301	0.521654	6	83.2326	308.058	123.756	104.794	1.33808	0.558514	K-Wm
3112	5486	106.791	167.9	12299.8	1.57224	464.629	0.636037	6	87.8315	439.528	104.602	125.174	1.18212	0.715609	K-Wm
3113	5487	119.698	166.126	12561.4	1.38788	496.259	0.720523	6	93.8107	448.876	101.31	126.498	1.24938	0.640636	K-Wm
3114	5488	145.121	256.73	20324.1	1.76907	726.819	0.565267	6	137.395	726.274	76.0476	160.906	1.43855	0.483224	K-Wm
3115	5489	90.2804	129.709	8714.85	1.43673	382.832	0.696025	6	72.369	311.421	118.265	105.365	1.15713	0.74685	K-Wm
3116	5496	119.098	281.235	19181.4	2.36138	685.784	0.423481	6	129.638	685.439	123.373	156.317	1.39718	0.512265	K-Wm
3118	5498	64.9298	136.092	6741.89	2.09599	350.062	0.477101	6	66.1742	240.919	49.9313	92.6736	1.20298	0.691007	K-Wm
3119	5499	186.227	480.589	57686.8	2.58067	1226.83	0.387497	6	299.501	2404.62	79.8753	271.084	1.44129	0.481391	K-Wm
3120	5500	100.32	239.348	16308.3	2.38585	596.645	0.419139	6	112.787	582.769	97.6476	144.135	1.31831	0.575395	K-Wm
3123	5503	120.692	178.552	13675.7	1.4794	514.414	0.67595	6	97.2427	488.695	145.635	131.99	1.2412	0.649102	K-Wm
3125	5509	124.59	228.823	17520.8	1.83661	571.179	0.544482	6	107.973	626.099	107.434	149.397	1.21759	0.674527	K-Wm
3131	5517	65.0196	143.146	6169.85	2.20158	337.027	0.454219	6	63.7102	220.477	100.598	88.6548	1.21069	0.682237	K-Wm
3132	5518	155.742	224.478	17506.8	1.44135	657.016	0.693793	6	124.2	625.596	135.699	149.337	1.40113	0.509382	K-Wm
3133	5523	100.547	193.128	12361.9	1.92078	493.546	0.520623	6	93.2979	441.747	96.5504	125.49	1.25254	0.637411	K-Wm
3135	5525	84.7828	179.297	10413	2.11478	445.791	0.472863	6	84.2706	372.103	70.9516	115.174	1.23268	0.658115	K-Wm
3136	5526	73.4373	107.548	6826.77	1.46449	315.297	0.682829	6	59.6025	243.952	84.5248	93.2552	1.07676	0.86251	K-Wm
3138	5528	85.6529	132.602	7926.98	1.54814	362.977	0.645937	6	68.6157	283.267	129.57	100.489	1.15035	0.755682	K-Wm
3140	5530	120.072	210.864	17479.7	1.75615	559.484	0.569426	6	105.763	624.63	102.088	149.222	1.19406	0.701372	K-Wm
3141	5531	87.6796	158.03	9074.62	1.80235	430.854	0.55483	6	81.4468	324.278	93.6934	107.518	1.27621	0.613986	K-Wm
3147	5541	97.5961	110.702	8072.78	1.13429	347.01	0.881613	6	162.515	1001.7	15.2248	101.409	1.08977	0.842033	K-Wm
3148	5542	134.753	254.699	23868.2	1.89012	720.718	0.529067	6	136.242	852.919	91.7357	174.371	1.31632	0.577135	K-Wm
3149	5548	94.268	164.391	10120.3	1.74387	471.489	0.573437	6	89.1283	361.644	131.573	113.543	1.32245	0.571794	K-Wm
3150	5549	128.128	183.476	13590.4	1.43197	552.84	0.698339	6	104.507	485.645	42.0408	131.577	1.3381	0.558499	K-Wm
3152	5551	100.785	259.74	17777.6	2.57719	642.345	0.38802	6	121.426	635.275	90.0293	150.488	1.35937	0.54116	K-Wm
3153	5552	122.794	299.787	18937.4	2.44138	755.05	0.409604	6	142.732	676.719	109.32	155.319	1.54818	0.417213	K-Wm
3154	5553	177.386	405.503	37794.8	2.28599	1149.17	0.437448	6	217.235	1350.58	97.6938	219.422	1.66792	0.359459	K-Wm
3155	5554	69.4619	211.876	10068.2	3.05025	492.479	0.327842	6	93.0962	359.782	90.8042	113.251	1.3849	0.521393	K-Wm
3156	5555	89.8164	128.206	8453.82	1.42742	374.822	0.700564	6	70.8548	302.094	12.0948	103.775	1.15028	0.755776	K-Wm
3157	5556	105.373	146.838	7804.77	1.39351	419.32	0.717614	6	79.2666	278.9	147.21	99.7115	1.33928	0.557516	K-Wm
3158	5563	121.795	158.854	13299.4	1.30427	463.86	0.766711	6	87.6863	475.248	90.1119	130.161	1.13495	0.77633	K-Wm
3160	5570	119.334	191.407	16773.4	1.60397	558.445	0.623455	6	105.566	599.389	8.02252	146.176	1.21668	0.675536	K-Wm
3162	5575	121.187	243.269	17662.5	2.00739	631.103	0.49816	6	119.301	631.161	20.8272	150	1.33992	0.556981	K-Wm
3163	5576	65.4757	152.023	7554.43	2.32182	376.193	0.430697	6	71.114	269.954	68.969	98.0993	1.22128	0.670455	K-Wm
3165	5578	111.085	202.443	15656.1	1.82242	560.867	0.548721	6	106.024	559.464	101.581	141.223	1.26481	0.625104	K-Wm
3167	5580	56.9749	140.832	6515.6	2.47183	342.303	0.404559	6	64.7076	232.832	130.134	91.105	1.19657	0.698428	K-Wm
3171	5590	88.7717	180.331	11458.8	2.0314	447.274	0.492272	6	84.5508	409.475	88.1486	120.819	1.17899	0.719417	K-Wm
3174	5596	104.817	209.121	12698.7	1.9951	524.711	0.501229	6	99.1892	453.782	29.0546	127.187	1.31385	0.579306	K-Wm
3175	5597	252.791	400.102	42447.2	1.58273	1235.77	0.631818	6	233.604	1516.83	67.3801	232.536	1.69245	0.349114	K-Wm
3178	5600	105.042	168.42	11420.1	1.60336	478.107	0.62369	6	90.3795	408.092	30.4363	120.615	1.2624	0.627492	K-Wm
3179	5601	85.9391	206.88	13725.4	2.40728	511.238	0.415406	6	96.6424	490.473	109.83	132.229	1.2313	0.659582	K-Wm
3180	5602	121.177	136.53	12267.5	1.1267	449.159	0.88755	6	84.9072	438.373	109.9	125.009	1.14427	0.763737	K-Wm
3181	5606	86.514	142.825	7663.24	1.65089	372.132	0.605733	6	70.3463	273.843	134.044	98.8033	1.19949	0.695037	K-Wm
3185	5610	70.0013	111.887	5597.46	1.59836	298.947	0.625641	6	56.5118	200.023	77.4712	84.4424	1.12747	0.786669	K-Wm
3186	5618	198.278	235.806	31231.1	1.18927	733.231	0.840851	6	138.607	1116.03	49.539	199.461	1.17072	0.729619	K-Wm
3188	5620	136.577	148.315	15390.3	1.08594	498.275	0.920859	6	94.1918	549.965	96.1927	140.019	1.13332	0.778571	K-Wm
3190	5622	101.793	148.612	11159	1.45994	446.583	0.684959	6	84.4202	398.762	85.5028	119.228	1.19287	0.702766	K-Wm
3191	5631	149.622	298.054	26083.5	1.99205	864.618	0.501996	6	163.444	932.084	16.728	182.284	1.51059	0.438235	K-Wm
3194	5634	107.319	167.084	12056.3	1.55689	443.441	0.642306	6	83.8263	430.825	82.4054	123.929	1.13955	0.77007	K-Wm
3198	5642	112.119	139.369	11297.2	1.24304	409.872	0.804478	6	77.4806	403.699	113.71	119.964	1.0881	0.84462	K-Wm
3199	5643	90.6457	138.368	9264.93	1.52647	394.611	0.655106	6	74.5956	331.078	112.55	108.639	1.15679	0.747299	K-Wm
3200	5647	189.679	358.37	32566.5	1.88935	1055.01	0.529283	6	199.436	1163.75	92.7639	203.681	1.6496	0.367489	K-Wm
3202	5649	96.7188	138.963	9420.23	1.43678	374.825	0.696003	6	70.8554	336.628	80.6865	109.546	1.08969	0.842159	K-Wm
3203	5650	84.0378	132.45	7922.9	1.57608	353.606	0.634485	6	66.8442	283.122	89.1077	100.463	1.12094	0.795857	K-Wm
3204	5651	87.6122	130.32	7922.21	1.48746	370.34	0.672287	6	70.0076	283.097	68.6901	100.459	1.17404	0.725494	K-Wm
3205	5652	162.538	191.745	16208.8	1.17969	599.062	0.84768	6	113.244	579.214	138.628	143.695	1.32771	0.567278	K-Wm
3206	5655	176.053	329.363	34517.1	1.87082	854.561	0.534526	6	161.543	1233.45	100.305	209.692	1.29787	0.59366	K-Wm
3207	5656	99.5267	210.53	14121	2.11531	519.155	0.472744	6	98.1389	504.609	105.722	134.121	1.23273	0.658056	K-Wm
3209	5658	110.885	163.701	10850.6	1.47631	499.184	0.677363	6	94.3636	387.743	116.295	117.569	1.35219	0.546921	K-Wm
3211	5660	112.681	214.388	14857.8	1.90261	568.888	0.525594	6	107.54	530.937	46.2507	137.576	1.31691	0.576621	K-Wm
3213	5662	73.7654	176.704	8584.49	2.39548	423.442	0.417453	6	80.0458	306.763	95.1119	104.574	1.28956	0.601334	K-Wm
3214	5663	92.3827	199.143	11725	2.15563	486.263	0.463901	6	91.9212	418.987	78.596	122.214	1.26713	0.622814	K-Wm
3215	5664	78.9365	159.723	9530.57	2.02344	437.337	0.494208	6	82.6723	340.571	61.4208	110.186	1.26404	0.62586	K-Wm
3216	5665	92.013	116.955	8269.95	1.27107	346.953	0.786738	6	65.5866	295.523	67.5372	102.64	1.07653	0.86288	K-Wm
3218	5670	94.7719	328.174	19143.5	3.46277	777.703	0.288786	6	147.014	684.086	96.8152	156.162	1.58602	0.397543	K-Wm
3220	5672	80.5102	155.823	9253.32	1.93545	385.922	0.516676	6	72.9532	330.663	59.5546	108.571	1.13203	0.780346	K-Wm
3224	5676	132.299	178.26	16356.5	1.34741	523.077	0.742167	6	98.8803	584.493	12.5648	144.348	1.15405	0.750844	K-Wm
3225	5677	74.4734	260.425	14164.1	3.49688	587.178	0.285969	6	110.998	506.149	78.6505	134.326	1.39213	0.515988	K-Wm
3226	5678	121.27	204.41	17324.2	1.68558	545.87	0.593269	6	103.189	619.075	64.6319	148.557	1.17022	0.730241	K-Wm
3228	5684	86.5106	109.479	6282.36	1.2655	326.296	0.790202	6	61.6817	224.498	161.334	89.4595	1.1616	0.741121	K-Wm
3232	5688	158.943	372.182	34860.6	2.34161	970.813	0.427057	6	183.518	1245.73	67.8275	210.733	1.46715	0.464572	K-Wm
3233	5689	97.9884	127.549	8404.17	1.30168	364.493	0.768239	6	68.9023	300.319	111.038	103.47	1.12188	0.794521	K-Wm
3240	5705	96.4452	163.166	11469.8	1.6918	441.662	0.591086	6	83.49	409.867	5.74618	120.877	1.16364	0.738524	K-Wm
3242	5707	107.369	154.22	9279.64	1.43636	426.718	0.696206	6	80.665	331.604	145.404	108.725	1.24991	0.640087	K-Wm
3244	5713	120.557	192.109	16701.9	1.59351	560.63	0.627544	6	105.979	596.836	97.2707	145.864	1.22405	0.667427	K-Wm
3245	5714	80.2392	175.11	8846.49	2.18235	459.456	0.458222	6	86.8537	316.126	87.4033	106.158	1.37836	0.526348	K-Wm
3247	5722	134.704	196.919	16871.3	1.46186	557.502	0.68406	6	105.388	602.887	159.195	146.602	1.21109	0.681779	K-Wm
3248	5723	71.4094	137.113	6592.57	1.9201	350.69	0.520806	6	66.2929	235.583	116.14	91.6416	1.21871	0.673285	K-Wm
3250	5725	99.6845	228.459	15770.1	2.29182	589.447	0.436334	6	111.427	563.537	86.5269	141.737	1.32444	0.570077	K-Wm
3253	5728	113.288	180.386	13462.6	1.59227	489.094	0.628034	6	92.4564	481.081	92.0487	130.957	1.18941	0.70686	K-Wm
3254	5734	86.335	186.422	9515.94	2.15929	501.552	0.463116	6	94.8113	340.048	46.5254	110.101	1.45076	0.475128	K-Wm
3256	5743	81.9694	178.994	10391.2	2.18367	442.668	0.457944	6	83.6802	371.324	71.5651	115.053	1.22533	0.666035	K-Wm
3258	5749	79.4096	190.982	10520	2.40502	477.854	0.415796	6	90.3316	375.927	89.5597	115.764	1.3146	0.578647	K-Wm
3259	5750	99.3607	121.177	8305.58	1.21957	374.784	0.819964	6	70.8477	296.796	111.427	102.861	1.16038	0.742671	K-Wm
3263	5754	176.682	526.319	59763.9	2.97891	1379.95	0.335694	6	260.861	2135.64	92.1506	275.921	1.59276	0.394184	K-Wm
3264	5755	105.299	183.936	11555.7	1.7468	506.583	0.572475	6	95.7624	412.938	107.354	121.329	1.32971	0.565568	K-Wm
3265	5761	91.1008	211.087	13356	2.31707	532.535	0.43158	6	100.668	477.273	44.9809	130.438	1.30021	0.591522	K-Wm
3266	5762	194.678	263.103	33793	1.35148	827.04	0.739931	6	156.34	1207.58	17.7981	207.481	1.26946	0.620531	K-Wm
3267	5763	61.3512	310.487	13306.5	5.06081	680.234	0.197597	6	128.589	475.502	84.364	130.196	1.66392	0.361191	K-Wm
3268	5764	174.359	246.768	27000.5	1.41528	715.046	0.706572	6	135.169	964.85	70.0169	185.46	1.22787	0.663274	K-Wm
3269	5765	113.789	176.951	12616.3	1.55508	509.906	0.643054	6	96.3906	450.839	50.1944	126.774	1.28094	0.609456	K-Wm
3270	5766	143.598	241.418	21848.7	1.68121	712.082	0.594809	6	134.609	780.755	103.226	166.832	1.35932	0.541198	K-Wm
3274	5772	119.744	167.24	12089.7	1.39665	506.788	0.715998	6	95.8012	432.02	90.0307	124.1	1.30054	0.591223	K-Wm
3275	5773	100.138	190.635	13277.7	1.90372	514.92	0.525288	6	196.879	1128.73	101.74	130.055	1.26091	0.628975	K-Wm
3278	5777	152.824	201.755	22310.5	1.32018	641.163	0.757474	6	121.203	797.257	67.6637	168.585	1.21121	0.681652	K-Wm
3280	5779	85.248	115.779	6861.03	1.35814	341.292	0.736301	6	64.5165	245.176	102.995	93.4888	1.16262	0.739819	K-Wm
3283	5784	97.2278	287.161	18117	2.95348	689.792	0.338583	6	130.395	647.403	92.8827	151.918	1.44604	0.478233	K-Wm
3285	5786	134.339	166.709	15211.8	1.24095	526.257	0.805832	6	99.4815	543.589	27.1442	139.205	1.20396	0.689883	K-Wm
3288	5794	109.439	167.709	11830.4	1.53244	463.176	0.652553	6	87.5569	422.754	57.9231	122.762	1.20158	0.692622	K-Wm
3289	5795	99.106	116.824	6564.33	1.17878	370.049	0.848334	6	69.9525	234.573	132.628	91.4451	1.28875	0.602092	K-Wm
3293	5806	105.459	177.57	11467.2	1.68378	471.712	0.593901	6	89.1706	409.776	43.5524	120.863	1.24295	0.647281	K-Wm
3294	5807	107.094	196.792	12475.7	1.83757	510.044	0.544198	6	96.4166	445.816	92.1137	126.066	1.28848	0.60234	K-Wm
3295	5808	85.5508	139.266	8767.72	1.62787	373.758	0.614298	6	70.6537	313.311	71.5651	105.684	1.1263	0.788306	K-Wm
3300	5820	112.767	156.104	11698	1.38431	465.578	0.722381	6	88.0109	418.022	95.9425	122.073	1.21462	0.677822	K-Wm
3301	5821	109.651	217.616	16310	1.98462	589.7	0.503874	6	111.475	582.83	63.526	144.142	1.3029	0.589088	K-Wm
3302	5825	86.6462	164.136	8181.91	1.89432	408.458	0.527894	6	77.2133	292.377	90.1583	102.092	1.27416	0.615956	K-Wm
3303	5826	90.4777	255.446	14468.3	2.8233	622.259	0.354195	6	117.629	517.02	100.577	135.761	1.45971	0.469317	K-Wm
3304	5827	166.789	322.057	31210.2	1.93092	874.282	0.517887	6	165.271	1115.28	91.5484	199.395	1.3964	0.512842	K-Wm
3305	5828	150.398	299.328	26133.4	1.99024	859.365	0.502451	6	162.451	933.865	110.842	182.458	1.49998	0.444457	K-Wm
3306	5829	171.571	232.353	22047.1	1.35427	706.216	0.738406	6	133.5	787.843	167.462	167.587	1.34205	0.55522	K-Wm
3307	5830	98.7769	156.832	8471.25	1.58774	460.015	0.629825	6	86.9593	302.716	23.3455	103.882	1.41027	0.502798	K-Wm
3309	5837	131.956	389.327	26608.4	2.95043	976.439	0.338934	6	184.582	950.838	103.066	184.109	1.68905	0.350524	K-Wm
3310	5838	140.983	221.921	16862.4	1.57409	622.862	0.635286	6	117.743	602.569	82.7217	146.563	1.35344	0.545913	K-Wm
3312	5842	71.4975	126.872	6196.3	1.77449	345.329	0.563542	6	65.2795	221.422	75.4381	88.8447	1.23786	0.652615	K-Wm
3314	5844	60.7116	178.259	7883.51	2.93617	434.731	0.34058	6	82.1798	281.714	67.0679	100.213	1.38155	0.523924	K-Wm
3316	5849	95.722	103.67	7081.99	1.08303	352.512	0.923338	6	66.6374	253.072	109.654	94.9823	1.18196	0.715808	K-Wm
3318	5851	107.357	262.251	18965.5	2.44279	687.547	0.409368	6	129.971	677.726	81.2161	155.435	1.40872	0.503906	K-Wm
3319	5852	179.796	329.63	34130.7	1.83336	865.229	0.545447	6	163.559	1219.65	114.57	208.515	1.32149	0.572629	K-Wm
3320	5853	124.161	226.861	19538	1.82715	671.752	0.5473	6	126.985	698.182	84.2665	157.763	1.35604	0.543817	K-Wm
3325	5862	99.17	141.602	10642.3	1.42787	409.672	0.700341	6	77.4427	380.299	97.3387	116.435	1.12053	0.796442	K-Wm
3327	5868	117.693	301.84	22432.7	2.56464	776.753	0.389919	6	146.834	801.624	77.7352	169.047	1.46335	0.466989	K-Wm
3328	5869	117.844	141.839	11810.4	1.20362	447.827	0.830828	6	84.6554	422.038	41.2554	122.658	1.16274	0.73966	K-Wm
3329	5870	85.6477	149.914	8781.95	1.75036	410.025	0.571311	6	77.5095	313.819	145.172	105.77	1.23458	0.656084	K-Wm
3330	5871	83.3426	152.966	7976.76	1.83539	417.558	0.544844	6	78.9334	285.046	82.92	100.804	1.31919	0.574624	K-Wm
3332	5876	82.0771	193.266	10852.8	2.35469	483.084	0.424685	6	91.3203	387.821	96.2488	117.581	1.30845	0.584099	K-Wm
3334	5878	236.831	264.983	35805.4	1.11887	922.315	0.89376	6	174.351	1279.49	97.2113	213.57	1.37534	0.528664	K-Wm
3335	5879	192.244	408.893	44711.2	2.12695	1063.68	0.470157	6	201.074	1597.74	61.9492	238.657	1.41941	0.496346	K-Wm
3337	5881	61.1888	167.075	7925.73	2.73048	405.386	0.366236	6	76.6325	283.223	84.958	100.481	1.28486	0.605747	K-Wm
3339	5883	172.349	232.704	22896.7	1.35019	686.938	0.740636	6	129.856	818.204	127.218	170.786	1.28096	0.609435	K-Wm
3340	5884	112.856	221.547	17703.8	1.96309	590.655	0.509401	6	111.655	632.639	123.587	150.175	1.25258	0.637366	K-Wm
3342	5887	124.706	233.97	16924.8	1.87617	619.861	0.533001	6	117.176	604.799	119.617	146.834	1.34443	0.553253	K-Wm
3348	5893	101.478	327.35	19990.7	3.22581	787.238	0.309999	6	148.816	714.358	91.43	159.58	1.57108	0.40514	K-Wm
3350	5895	120.826	139.945	11831.7	1.15824	434.962	0.863381	6	158.627	967.43	101.519	122.769	1.12832	0.78548	K-Wm
3351	5899	104.801	213.234	14202.2	2.03465	561.38	0.491485	6	106.121	507.51	53.6279	134.506	1.32918	0.56602	K-Wm
3353	5901	213.232	345.242	41081.2	1.61909	957.537	0.617629	6	181.009	1468.02	115.043	228.763	1.33303	0.562758	K-Wm
3355	5903	93.8385	215.188	14361.4	2.29318	544.534	0.436076	6	102.937	513.2	85.0896	135.258	1.28213	0.608327	K-Wm
3356	5904	141.018	199.198	19614.8	1.41257	595.641	0.70793	6	112.598	700.927	81.2528	158.073	1.20005	0.694391	K-Wm
3358	5907	81.924	150.114	7880.13	1.83235	400.143	0.545746	6	75.6414	281.593	30.0686	100.192	1.2719	0.618148	K-Wm
3362	5914	146.655	275.66	26304.8	1.87966	754.635	0.532012	6	142.653	939.991	71.0163	183.055	1.31288	0.580164	K-Wm
3363	5915	109.936	198.586	16109	1.80638	552.011	0.553594	6	104.35	575.648	95.9738	143.252	1.22721	0.663992	K-Wm
3364	5919	104.508	200.908	12806.8	1.92243	532.837	0.520175	6	100.725	457.647	91.9092	127.728	1.32855	0.566556	K-Wm
3365	5920	136.014	248.426	22235.1	1.82647	721.53	0.547504	6	136.395	794.562	98.293	168.3	1.36534	0.536439	K-Wm
3366	5921	120.763	180.264	13258.5	1.4927	549.375	0.669925	6	103.852	473.787	74.8079	129.961	1.34625	0.551754	K-Wm
3367	5922	69.5494	130.34	6415.55	1.87407	325.583	0.533599	6	61.5469	229.257	32.8162	90.4029	1.14696	0.760152	K-Wm
3368	5923	105.799	156.613	11672.5	1.48028	462.73	0.675549	6	87.4726	417.111	131.987	121.94	1.20851	0.684695	K-Wm
3370	5925	120.689	227.578	19791.8	1.88566	595.76	0.530319	6	112.62	707.253	90.8016	158.785	1.19491	0.700379	K-Wm
3374	5931	66.4413	129.282	6829.5	1.9458	349.864	0.513926	6	66.1368	244.049	93.223	93.2738	1.19456	0.700778	K-Wm
3376	5933	167.994	310.44	32018.7	1.84792	875.875	0.541148	6	165.572	1144.17	64.1775	201.961	1.38117	0.524214	K-Wm
3377	5938	88.2574	147.204	8132.23	1.6679	393.558	0.599558	6	74.3967	290.602	83.625	101.782	1.23143	0.659449	K-Wm
3378	5939	198.706	407.552	44524.4	2.05103	1053.7	0.48756	6	199.188	1591.06	112.405	238.157	1.40904	0.503675	K-Wm
3379	5940	81.1434	181.186	10706.1	2.23291	455.811	0.447845	6	86.1647	382.579	76.2564	116.783	1.24301	0.647219	K-Wm
3381	5942	159.855	237.349	21243.7	1.48477	701.453	0.673504	6	132.6	759.135	85.6013	164.506	1.35797	0.542279	K-Wm
3383	5944	48.9293	193.013	6639.02	3.94474	420.8	0.253502	6	79.5463	237.243	79.189	91.9638	1.45723	0.470914	K-Wm
3384	5945	243.81	365.828	39353.6	1.50047	1196.76	0.666459	6	226.23	1406.28	118.179	223.902	1.70223	0.345113	K-Wm
3385	5951	131.183	191.891	13025	1.46277	552.112	0.683636	6	104.369	465.444	101.497	128.811	1.36503	0.536677	K-Wm
3386	5952	88.8474	152.983	8758.94	1.72187	404.166	0.580766	6	76.4018	312.997	114.488	105.631	1.21854	0.673476	K-Wm
3387	5953	137.871	221.228	17204.9	1.6046	609.534	0.623209	6	115.224	614.808	135.871	148.044	1.31123	0.581627	K-Wm
3388	5954	75.6409	105.282	6445.8	1.39186	308.785	0.718461	6	58.3714	230.338	3.91404	90.6157	1.08523	0.849091	K-Wm
3390	5956	126.469	140.631	11668.9	1.11198	452.805	0.899295	6	85.5965	416.983	97.9629	121.921	1.18277	0.714819	K-Wm
3392	5958	91.6934	205.751	11153.2	2.2439	530.549	0.445652	6	100.293	398.556	87.7974	119.197	1.41752	0.497669	K-Wm
3393	5960	103.02	152.506	10044.6	1.48035	422.381	0.675518	6	79.8453	358.939	78.6901	113.118	1.18917	0.707151	K-Wm
3394	5961	80.2765	158.418	7444.97	1.97341	392.433	0.506738	6	74.1839	266.043	66.3802	97.386	1.28333	0.607186	K-Wm
3396	5963	120.434	176.098	12700.6	1.4622	481.339	0.683903	6	90.9903	453.851	16.5262	127.197	1.20516	0.688513	K-Wm
3397	5964	189.496	543.61	58949.7	2.86872	1419.86	0.348587	6	287.158	2503.41	65.0991	274.035	1.65009	0.367268	K-Wm
3398	5965	88.808	195.391	11781.6	2.20015	483.906	0.454515	6	91.4757	421.011	84.5384	122.509	1.25795	0.631935	K-Wm
3399	5966	89.128	183.988	12292.8	2.06432	463.944	0.484421	6	87.702	439.279	50.5413	125.139	1.18071	0.717317	K-Wm
3400	5972	94.7482	113.8	8054.94	1.20107	364.332	0.832588	6	369.232	2669.34	42.2198	101.297	1.14544	0.76218	K-Wm
3401	5973	95.1158	198.744	11710.5	2.0895	494.168	0.478584	6	93.4155	418.469	84.6714	122.139	1.28852	0.602304	K-Wm
3404	5976	68.53	169.612	7622.38	2.47501	399.68	0.404039	6	75.5539	272.382	90.4291	98.5395	1.29173	0.599316	K-Wm
3405	5984	84.824	112.52	6721.72	1.32652	331.071	0.753855	6	62.5843	240.198	37.4736	92.5348	1.13943	0.770243	K-Wm
3406	5985	135.234	163.745	14399.8	1.21083	503.219	0.825879	6	95.1264	514.569	8.53077	135.439	1.18327	0.714219	K-Wm
3410	5989	92.8296	124.555	7938.97	1.34176	366.698	0.745291	6	69.3191	283.696	54.0981	100.565	1.16127	0.741544	K-Wm
3412	5991	102.184	282.267	16443.1	2.76234	705.247	0.362012	6	133.317	587.588	77.998	144.73	1.55187	0.415233	K-Wm
3413	5997	99.2129	116.843	8818.23	1.1777	380.062	0.849115	6	71.8454	315.116	29.9382	105.988	1.14201	0.766764	K-Wm
3414	5998	109.685	174.773	13328.3	1.59341	473.776	0.627586	6	89.5608	476.28	48.1147	130.302	1.15795	0.74579	K-Wm
3415	5999	183.263	388.7	34578.8	2.12099	1137.36	0.471477	6	215.001	1235.66	174.644	209.88	1.72583	0.335743	K-Wm
3416	6000	189.399	317.161	33404.4	1.67457	924.839	0.59717	6	174.828	1193.69	94.5325	206.285	1.42781	0.490524	K-Wm
3417	6007	123.913	223.212	17876.4	1.80136	605.584	0.555136	6	114.477	638.805	52.4314	150.906	1.27802	0.61224	K-Wm
3418	6008	54.0849	140.697	5952.71	2.60142	345.765	0.384406	6	65.362	212.717	79.1642	87.0808	1.26453	0.625377	K-Wm
3421	6011	79.9727	124	6527.46	1.55053	336.846	0.64494	6	63.676	233.256	100.148	91.1879	1.17642	0.722556	K-Wm
3422	6012	90.2249	164.265	9798.44	1.82062	418.965	0.549263	6	79.1994	350.143	87.9278	111.723	1.19427	0.701118	K-Wm
3423	6020	125.154	164.855	11878.2	1.31722	482.465	0.759176	6	91.2031	424.462	102.348	123.01	1.24909	0.640928	K-Wm
3424	6021	250.634	606.949	78554.4	2.42166	1922.85	0.41294	6	363.487	2807.11	134.105	316.337	1.93582	0.266852	K-Wm
3425	6022	238.391	291.805	44495.7	1.22406	958.612	0.816954	6	181.212	1590.04	47.6038	238.081	1.2823	0.608166	K-Wm
3426	6023	117.313	161.01	10901.3	1.37248	487.21	0.728606	6	92.1002	389.554	109.149	117.843	1.31668	0.576816	K-Wm
3428	6025	94.3923	203.618	14454.2	2.15715	525.146	0.463575	6	99.2715	516.516	64.5865	135.695	1.2325	0.6583	K-Wm
3431	6028	107.218	204.644	13462.7	1.90868	550.167	0.523924	6	104.001	481.083	97.125	130.958	1.33793	0.55864	K-Wm
3435	6044	85.9556	138.949	6436.9	1.61652	401.449	0.618614	6	75.8884	230.02	6.20374	90.5532	1.41188	0.501655	K-Wm
3438	6053	289.285	700.878	101005	2.42279	1861.75	0.412747	6	351.938	3609.36	115.417	358.704	1.65294	0.366005	K-Wm
3439	6054	105.646	207.158	13032	1.96086	547.402	0.50998	6	103.479	465.693	61.8014	128.846	1.35303	0.546245	K-Wm
3441	6056	170.777	258.582	24701.3	1.51415	830.956	0.660437	6	157.08	882.689	80.2975	177.388	1.49184	0.449317	K-Wm
3442	6057	127.253	153.39	14211.8	1.20539	471.512	0.829604	6	89.1327	507.853	179.945	134.552	1.11602	0.802885	K-Wm
3443	6058	139.543	222.847	15868.9	1.59697	606.793	0.626186	6	114.706	567.069	107.65	142.18	1.35917	0.541322	K-Wm
3444	6059	110.723	254.15	21287.2	2.29537	674.343	0.435659	6	127.475	760.687	92.7263	164.674	1.30415	0.587958	K-Wm
3445	6067	229.326	386.022	53660.4	1.68329	1144.88	0.594074	6	216.424	1917.53	111.636	261.452	1.39457	0.514187	K-Wm
3446	6068	164.936	199.216	23206	1.20784	617.42	0.827927	6	116.715	829.258	154.403	171.936	1.14363	0.76459	K-Wm
3450	6072	157.311	273.604	27159.5	1.73926	748.09	0.574958	6	141.416	970.534	94.8178	186.006	1.28085	0.609542	K-Wm
3452	6079	97.4935	163.958	11201.2	1.68174	435.204	0.594624	6	82.2692	400.269	101.372	119.453	1.16029	0.742792	K-Wm
3454	6081	97.8813	132.416	9961.55	1.35282	398.639	0.739197	6	75.3572	355.972	89.7415	112.649	1.12699	0.787329	K-Wm
3455	6085	98.9117	220.04	14704.5	2.22462	590.087	0.449516	6	111.548	525.459	64.8053	136.864	1.37308	0.530405	K-Wm
3456	6086	78.5847	134.131	6838.72	1.70684	355.282	0.585879	6	67.161	244.379	43.9272	93.3368	1.21225	0.680485	K-Wm
3457	6087	153.331	365.403	30851.7	2.38309	938.317	0.419623	6	177.376	1102.47	95.1646	198.246	1.50735	0.440118	K-Wm
3460	6094	73.9574	273.291	14335	3.69525	637.648	0.270618	6	120.538	512.254	83.462	135.134	1.50275	0.442817	K-Wm
3462	6096	195.608	312.104	42507	1.59556	946.797	0.626739	6	178.979	1518.97	88.4049	232.7	1.29578	0.595575	K-Wm
3464	6100	108.225	156.12	11806.7	1.44256	504.249	0.693214	6	95.3211	421.908	171.206	122.639	1.30944	0.583215	K-Wm
3466	6102	109.485	220.536	13396	2.0143	585.237	0.49645	6	110.631	478.701	83.6618	130.633	1.42675	0.491249	K-Wm
3467	6103	157.706	269.669	23055.3	1.70995	733.093	0.584814	6	138.581	823.871	95.1296	171.376	1.36232	0.538819	K-Wm
3468	6104	84.7802	162.517	10096.3	1.91692	425.735	0.521669	6	80.4791	360.787	64.7025	113.409	1.19554	0.699639	K-Wm
3469	6105	66.619	156.05	7631.33	2.34242	381.557	0.426908	6	72.128	272.702	89.8718	98.5973	1.23244	0.65837	K-Wm
3470	6106	108.06	270.151	17008.3	2.5	668.228	0.4	6	126.319	607.784	82.1467	147.196	1.44577	0.478411	K-Wm
3471	6114	206.876	264.145	38718.2	1.27683	831.651	0.78319	6	157.212	1383.58	105.456	222.087	1.19258	0.70311	K-Wm
3472	6115	150.702	212.783	21479.3	1.41194	598.325	0.708244	6	113.105	767.553	143.259	165.415	1.15195	0.75359	K-Wm
3474	6117	122.062	199.575	14520.9	1.63502	541.177	0.611612	6	102.302	518.899	118.983	136.007	1.26721	0.622737	K-Wm
3475	6118	105.906	190.655	11447.2	1.80023	547.697	0.555484	6	103.534	409.061	89.7695	120.758	1.44443	0.479301	K-Wm
3477	6120	109.889	156.746	12091.3	1.4264	445.138	0.701064	6	84.147	432.079	65.556	124.109	1.14225	0.766436	K-Wm
3478	6126	76.1375	137.548	6104.54	1.80657	349.495	0.553536	6	66.0671	218.143	117.326	88.1844	1.26217	0.627713	K-Wm
3479	6127	79.0042	165.242	9516.64	2.09156	419.458	0.478113	6	79.2926	340.073	52.4451	110.105	1.21325	0.679355	K-Wm
3481	6129	139.552	175.119	14907.3	1.25487	530.537	0.796898	6	100.291	532.707	59.9314	137.805	1.22609	0.665209	K-Wm
3482	6130	188.969	379.469	41876.4	2.0081	983.451	0.497982	6	185.908	1496.44	81.108	230.967	1.35604	0.543818	K-Wm
3483	6131	252.506	571.926	72587.9	2.26499	1659.53	0.441502	6	313.711	2593.9	78.1807	304.087	1.73803	0.331043	K-Wm
3484	6132	118.777	141.35	12752.9	1.19004	464.217	0.840307	6	87.7536	455.721	56.5663	127.459	1.1599	0.74329	K-Wm
3485	6136	158.653	352.477	31899.6	2.22169	968.672	0.450108	6	183.114	1139.92	97.3524	201.585	1.53034	0.426994	K-Wm
3486	6137	142.759	179.324	17551.9	1.25613	557.346	0.796095	6	105.358	627.208	84.7644	149.529	1.18705	0.70968	K-Wm
3487	6138	96.6428	119.001	8147.99	1.23135	356.871	0.812118	6	67.4615	291.165	105.945	101.88	1.11556	0.803557	K-Wm
3490	6147	99.012	355.815	19618.6	3.59366	850.198	0.278268	6	160.718	701.062	95.9019	158.088	1.71274	0.340893	K-Wm
3493	6150	73.8218	110.545	6535.51	1.49745	319.453	0.6678	6	105.593	553.788	27.5805	91.2441	1.11499	0.80437	K-Wm
3494	6156	118.589	241.975	19719	2.04045	637.688	0.490089	6	120.546	704.65	96.3402	158.492	1.28136	0.609057	K-Wm
3498	6162	168.327	220.708	22446	1.31119	701.864	0.762667	6	132.677	802.097	45	169.096	1.32187	0.572298	K-Wm
3499	6163	95.6053	211.785	14917.4	2.2152	529.816	0.451427	6	100.154	533.066	89.8817	137.852	1.22401	0.667472	K-Wm
3500	6164	81.0362	157.031	9767.16	1.93779	420.089	0.516052	6	79.4118	349.025	96.6225	111.545	1.19939	0.695146	K-Wm
3502	6166	172.25	420.367	48748.2	2.44045	1074.27	0.409761	6	203.075	1742	93.5763	249.198	1.37289	0.530549	K-Wm
3503	6174	97.1747	140.24	9806.56	1.44317	444.644	0.692919	6	84.0537	350.433	15.5406	111.77	1.26695	0.62299	K-Wm
3504	6175	102.641	187.32	12336.8	1.825	465.682	0.547945	6	88.0306	440.852	104.036	125.362	1.18302	0.714522	K-Wm
3505	6176	84.3536	94.4424	5743.42	1.1196	290.483	0.893176	6	54.9117	205.239	92.2948	85.5363	1.08153	0.854907	K-Wm
3506	6186	79.5349	105.622	6593.01	1.328	328.212	0.753014	6	62.0439	235.598	164.517	91.6446	1.14056	0.768711	K-Wm
3508	6194	100.847	198.428	12261.6	1.96762	515.287	0.508228	6	97.4078	438.164	63.1125	124.98	1.31305	0.580014	K-Wm
3509	6195	141.769	317.918	27329.9	2.24251	857.911	0.44593	6	162.176	976.623	57.9799	186.588	1.46429	0.466384	K-Wm
3510	6196	142.92	299.439	25476.7	2.09515	783.349	0.477293	6	148.081	910.397	78.8346	180.151	1.38481	0.52146	K-Wm
3513	6204	214.146	442.701	48645.6	2.06728	1177.42	0.483727	6	222.574	1738.33	86.1435	248.936	1.50631	0.44073	K-Wm
3514	6205	74.9645	196.703	10592.8	2.62395	468.162	0.381104	6	88.4995	378.528	97.9996	116.164	1.2835	0.607025	K-Wm
3515	6206	93.5226	167.924	12462.8	1.79555	460.826	0.556933	6	141.636	861.218	97.4314	126.001	1.16476	0.737105	K-Wm
3516	6207	98.9255	182.627	12390.1	1.84611	496.126	0.541681	6	93.7856	442.754	78.6017	125.633	1.25765	0.632237	K-Wm
3518	6209	113.552	139.123	8442.91	1.2252	454.957	0.816194	6	86.0031	301.704	30.0054	103.708	1.39711	0.51232	K-Wm
3519	6210	101.731	142.429	8030.34	1.40005	415.052	0.714258	6	78.4598	286.961	12.5288	101.142	1.3069	0.585488	K-Wm
3520	6211	104.027	129.399	8716.25	1.2439	432.981	0.803925	6	81.849	311.471	172.875	105.373	1.30861	0.583957	K-Wm
3521	6212	137.833	268.573	23797.7	1.94854	737.989	0.513204	6	139.506	850.4	66.5273	174.114	1.34986	0.548813	K-Wm
3523	6219	97.4062	155.757	9431.97	1.59905	414.535	0.625371	6	78.3621	337.047	142.431	109.614	1.20439	0.689396	K-Wm
3524	6220	77.2127	165.129	8548.63	2.13862	414.79	0.46759	6	78.4102	305.482	105.067	104.355	1.26586	0.624065	K-Wm
3525	6221	87.0263	97.145	6161.97	1.11627	308.558	0.89584	6	58.3285	220.195	135	88.5982	1.10913	0.812898	K-Wm
3526	6222	65.2628	253.65	11606.2	3.88659	575.816	0.257295	6	108.85	414.744	98.0224	121.594	1.50815	0.439656	K-Wm
3529	6227	73.0088	183.248	10095.6	2.50994	453.842	0.398416	6	85.7923	360.762	86.4971	113.405	1.27451	0.61562	K-Wm
3530	6232	118.331	153.779	12290.6	1.29957	430.896	0.769487	6	81.4548	439.198	179.872	125.127	1.09671	0.831414	K-Wm
3531	6237	106.038	158.959	10760	1.49908	432.603	0.667077	6	81.7776	384.502	165.173	117.077	1.17677	0.722138	K-Wm
3532	6238	117.795	167.617	12461.5	1.42296	502.525	0.702761	6	94.9953	445.307	82.8433	125.994	1.27022	0.61979	K-Wm
3535	6242	68.0877	111.894	6315.52	1.64338	307.276	0.608502	6	58.0862	225.682	177.72	89.6953	1.09101	0.84012	K-Wm
3536	6243	172.897	227.354	27501.2	1.31497	761.581	0.760474	6	143.966	982.745	94.8519	187.172	1.29582	0.595538	K-Wm
3537	6244	101.935	279.632	18421	2.74323	707.882	0.364534	6	133.815	658.268	88.4143	153.187	1.47167	0.461723	K-Wm
3538	6245	188.948	436.24	33634	2.30878	1216.56	0.43313	6	229.973	1201.9	111.551	206.992	1.87175	0.285432	K-Wm
3539	6246	223.841	295.964	40006.7	1.32221	955.179	0.756312	6	180.563	1429.62	32.7201	225.752	1.34748	0.550748	K-Wm
3540	6247	96.2693	191.459	13003.8	1.98878	492.232	0.50282	6	93.0495	464.685	47.8153	128.706	1.21798	0.674094	K-Wm
3541	6248	124.052	282.529	17983.9	2.27751	714.588	0.439077	6	135.083	642.647	67.8017	151.359	1.50355	0.442346	K-Wm
3542	6249	96.9962	128.847	9165.48	1.32837	406.282	0.752802	6	76.8019	327.525	116.565	108.054	1.19744	0.697412	K-Wm
3543	6250	135.241	210.497	19607	1.55646	638.653	0.642482	6	120.728	700.648	56.8887	158.041	1.28696	0.60377	K-Wm
3544	6251	79.2282	213.419	11265.5	2.69373	500.663	0.371233	6	94.6433	402.566	109.812	119.795	1.33099	0.564479	K-Wm
3546	6253	93.267	112.569	7770.99	1.20696	341.248	0.828528	6	64.508	277.693	104.019	99.4954	1.09229	0.83816	K-Wm
3547	6257	67.5363	122.666	6771.19	1.8163	328.295	0.550571	6	62.0595	241.966	94.7892	92.8747	1.12574	0.78909	K-Wm
3549	6259	262.991	553.274	75410.8	2.10378	1539.54	0.475335	6	291.028	2694.77	79.2863	309.943	1.5819	0.399616	K-Wm
3550	6266	101.363	174.903	11859.1	1.72551	488.308	0.579538	6	92.3077	423.78	112.096	122.911	1.26524	0.624676	K-Wm
3551	6267	152.675	286.269	26073.9	1.87502	838.502	0.533329	6	158.507	931.74	104.041	182.25	1.46523	0.465787	K-Wm
3552	6268	105.59	142.909	9871.12	1.35343	422.547	0.738861	6	79.8766	352.74	100.362	112.137	1.20004	0.694394	K-Wm
3553	6269	70.2595	144.039	6514.1	2.0501	356.018	0.487782	6	67.3001	232.779	71.5651	91.0945	1.24466	0.645507	K-Wm
3554	6270	195.052	402.81	51269.5	2.06514	1111.41	0.484229	6	210.097	1832.09	81.5222	255.561	1.38501	0.521311	K-Wm
3556	6272	114.112	281.054	20115.6	2.46297	669.675	0.406014	6	126.593	718.821	95.9419	160.078	1.3323	0.56337	K-Wm
3557	6279	157.718	200.518	17165.4	1.27137	624.254	0.786553	6	118.006	613.397	124.926	147.874	1.34444	0.553248	K-Wm
3561	6283	101.579	180.076	11389.8	1.77277	512.687	0.56409	6	96.9163	407.009	108.862	120.454	1.3555	0.544251	K-Wm
3563	6294	141.527	368.697	33419.9	2.60513	913.697	0.383858	6	172.722	1194.25	95.9061	206.333	1.41028	0.502794	K-Wm
3564	6295	110.527	153.691	12521.5	1.39053	471.59	0.719149	6	89.1474	447.449	8.36219	126.297	1.18916	0.707158	K-Wm
3567	6304	144.829	282.616	25339.7	1.95137	735.068	0.51246	6	138.954	905.504	60.8829	179.666	1.30296	0.589029	K-Wm
3570	6307	128.14	277.567	22458.3	2.16613	754.325	0.461654	6	142.595	802.538	72.7985	169.143	1.42028	0.495735	K-Wm
3571	6310	110.404	191.56	14011.6	1.73508	501.669	0.576341	6	94.8334	500.699	133.333	133.601	1.19585	0.699268	K-Wm
3572	6311	190.54	214.674	27965	1.12666	742.786	0.887579	6	140.413	999.317	65.194	188.744	1.25332	0.636616	K-Wm
3573	6312	217.516	266.611	34228.5	1.22571	849.794	0.815855	6	160.642	1223.14	117.155	208.814	1.29606	0.595321	K-Wm
3575	6314	107.851	250.044	17229.4	2.31843	587.234	0.431327	6	111.008	615.684	84.5714	148.149	1.26235	0.627534	K-Wm
3576	6320	157.438	293.305	30794.8	1.86298	789.36	0.536773	6	275.352	3134.4	86.0287	198.063	1.26923	0.620749	K-Wm
3578	6322	87.0787	133.946	7733.85	1.53822	365.589	0.650102	6	69.1095	276.366	120.944	99.2574	1.17301	0.726772	K-Wm
3579	6323	190.294	269.355	31669.1	1.41547	778.1	0.706479	6	147.089	1131.68	71.1942	200.855	1.23374	0.656984	K-Wm
3582	6326	132.896	492.914	40423.4	3.70901	1199.97	0.269614	6	226.838	1444.51	87.7732	226.925	1.68407	0.352597	K-Wm
3583	6327	74.5692	223.343	10430.1	2.99512	533.055	0.333877	6	100.766	372.715	103.204	115.268	1.47276	0.461036	K-Wm
3584	6332	101.437	132.666	9312.7	1.30787	375.496	0.764601	6	70.9822	332.786	94.0228	108.919	1.09792	0.829574	K-Wm
3586	6334	76.1793	147.173	7638.31	1.93192	365.171	0.517619	6	69.0305	272.952	41.0529	98.6424	1.17897	0.719438	K-Wm
3587	6335	116.579	127.126	11907.1	1.09047	432.921	0.917038	6	81.8375	425.494	89.8199	123.159	1.11947	0.797954	K-Wm
3588	6336	82.3245	134.271	8492.07	1.631	364.472	0.613121	6	68.8983	303.46	94.9305	104.009	1.116	0.802923	K-Wm
3590	6339	83.0153	144.852	8807.35	1.74489	380.885	0.573103	6	72.0009	314.727	127.396	105.922	1.14519	0.762514	K-Wm
3591	6344	85.2803	178.445	9620.79	2.09245	464.671	0.477909	6	87.8395	343.795	74.5778	110.706	1.33673	0.559641	K-Wm
3592	6345	120.715	171.202	14286.4	1.41823	490.048	0.705104	6	92.6367	510.52	77.6785	134.905	1.15686	0.747199	K-Wm
3593	6346	146.738	207.066	19316.3	1.41112	597.505	0.708655	6	112.95	690.261	110.556	156.866	1.21307	0.679566	K-Wm
3596	6349	111.778	180.384	13670.1	1.61378	509.043	0.619664	6	96.2274	488.495	106.928	131.963	1.2285	0.662602	K-Wm
3597	6350	135.649	264.754	27850.2	1.95175	729.46	0.512361	6	137.894	995.216	79.5344	188.356	1.23337	0.657379	K-Wm
3598	6351	160.512	323.39	29949.6	2.01475	871.358	0.49634	6	164.718	1070.24	74.876	195.326	1.42071	0.495436	K-Wm
3600	6353	152.668	263.657	28020.8	1.72699	736.777	0.579041	6	139.277	1001.31	83.991	188.932	1.24194	0.648331	K-Wm
3602	6358	98.7694	196.122	12264.3	1.98566	519.032	0.503612	6	98.1156	438.258	121.608	124.993	1.32245	0.571799	K-Wm
3603	6359	219.562	277.142	30719.5	1.26225	959.566	0.792236	6	181.393	1097.75	92.1174	197.821	1.5448	0.419038	K-Wm
3605	6361	95.663	183.073	11952.1	1.91373	472.584	0.522539	6	89.3353	427.103	49.0583	123.392	1.21973	0.672165	K-Wm
3606	6362	137.622	243.422	18555.7	1.76877	676.593	0.565365	6	127.9	663.08	89.8883	153.746	1.4015	0.50911	K-Wm
3607	6363	141.936	199.764	17288.3	1.40742	588.456	0.710521	6	111.239	617.789	61.9469	148.402	1.26283	0.627064	K-Wm
3613	6379	116.383	127.098	10841.7	1.09206	435.481	0.915698	6	82.3216	387.424	167.905	117.521	1.18012	0.718041	K-Wm
3615	6381	80.0342	119.794	7524.95	1.49679	342.88	0.668097	6	64.8167	268.901	23.3694	97.9077	1.11531	0.803912	K-Wm
3616	6382	207.484	356.36	41494.4	1.71753	1082.48	0.582232	6	204.628	1482.79	121.394	229.911	1.49945	0.444772	K-Wm
3619	6385	100.128	180.919	12110.3	1.80688	491.995	0.55344	6	93.0047	432.758	40.8475	124.206	1.2615	0.628384	K-Wm
3622	6391	112.224	186.191	9564.23	1.65911	488.498	0.602733	6	92.3437	341.774	103.404	110.38	1.40943	0.503401	K-Wm
3623	6396	124.96	165.066	14052.6	1.32095	499.568	0.757032	6	94.4362	502.162	61.3584	133.796	1.18911	0.707223	K-Wm
3624	6397	74.8891	197.008	9593.7	2.63066	485.763	0.380132	6	91.8266	342.827	91.8724	110.55	1.39938	0.510654	K-Wm
3625	6398	94.5316	131.97	8311.73	1.39604	374.218	0.716313	6	70.7407	297.016	102.529	102.899	1.1582	0.745472	K-Wm
3626	6399	87.8303	102.587	6006.27	1.16802	317.998	0.856152	6	60.1131	214.631	108.435	87.4717	1.15778	0.746011	K-Wm
3629	6402	59.5671	170.505	7676.49	2.86239	395.199	0.349358	6	74.7069	274.316	98.1977	98.8887	1.27274	0.617334	K-Wm
3630	6407	72.5666	125.545	6832.56	1.73007	349.174	0.578013	6	66.0065	244.159	78.5856	93.2947	1.19194	0.703864	K-Wm
3631	6408	72.1195	198.035	9261.86	2.74593	471.757	0.364176	6	89.179	330.969	110.238	108.621	1.38317	0.522699	K-Wm
3632	6409	141.979	209.918	18625.8	1.47852	652.593	0.676354	6	123.364	665.586	132.584	154.036	1.34924	0.549313	K-Wm
3633	6410	103.462	148.82	10945.1	1.4384	424.27	0.695217	6	80.2023	391.118	71.4376	118.08	1.14429	0.763702	K-Wm
3634	6411	115.145	157.759	12678.3	1.37009	468.924	0.729881	6	88.6435	453.055	4.63263	127.086	1.1751	0.724181	K-Wm
3635	6412	137.439	354.719	32314.3	2.58093	840.591	0.387458	6	158.902	1154.74	74.2914	202.891	1.31945	0.574401	K-Wm
3636	6413	82.9656	103.058	6586.32	1.24217	317.447	0.805041	6	60.0089	235.359	70.4342	91.5981	1.10371	0.820901	K-Wm
3637	6414	135.178	244.62	17449.2	1.80961	711.782	0.552606	6	134.552	623.538	42.7163	149.091	1.52043	0.432583	K-Wm
3638	6418	115.534	267.6	20276.4	2.3162	656.962	0.431742	6	124.189	724.568	45.2058	160.716	1.30182	0.590065	K-Wm
3639	6419	125.915	220.628	16531.1	1.75221	612.06	0.570709	6	115.701	590.732	113.918	145.116	1.34322	0.554247	K-Wm
3641	6421	122.79	185.033	17240.6	1.5069	522.213	0.663613	6	98.7171	616.087	84.143	148.198	1.12222	0.794048	K-Wm
3642	6422	349.023	533.434	94706.6	1.52836	1773.75	0.654295	6	335.302	3384.3	97.8526	347.34	1.62632	0.378082	K-Wm
3645	6434	100.537	144.79	10133.9	1.44016	423.78	0.694368	6	80.1096	362.132	6.47386	113.62	1.18783	0.708742	K-Wm
3646	6435	241.176	412.737	58556.4	1.71135	1137.6	0.584333	6	215.046	2092.49	79.3803	273.119	1.3265	0.568314	K-Wm
3648	6437	88.4981	101.888	6852.34	1.1513	301.296	0.868584	6	56.9558	244.865	130.307	93.4296	1.02702	0.948073	K-Wm
3651	6440	203.931	373.457	43405.5	1.83129	1036.98	0.546064	6	196.026	1551.08	74.9315	235.146	1.40443	0.506987	K-Wm
3653	6442	105.892	217.162	14802.8	2.0508	546.926	0.487615	6	103.389	528.972	90	137.321	1.26842	0.62155	K-Wm
3655	6448	147.199	240.756	19624.2	1.63558	696.596	0.611403	6	131.682	701.262	133.194	158.111	1.4031	0.507949	K-Wm
3658	6451	68.438	133.341	6492.56	1.94834	341.351	0.513257	6	64.5277	232.009	85.6014	90.9438	1.19536	0.699846	K-Wm
3659	6452	92.079	163.04	9334.2	1.77065	415.883	0.564763	6	78.6168	333.554	94.5923	109.044	1.21461	0.677835	K-Wm
3660	6453	82.907	119.573	6123.79	1.44226	332.012	0.693358	6	62.7621	218.831	63.2611	88.3233	1.19715	0.697756	K-Wm
3661	6454	208.87	382.414	47954.7	1.83087	1102.12	0.546189	6	208.34	1713.64	86.4252	247.161	1.4201	0.495864	K-Wm
3665	6471	99.3111	172.026	10800	1.7322	435.368	0.577301	6	82.3002	385.932	83.6598	117.294	1.18209	0.715647	K-Wm
3666	6472	69.1561	111.478	6275.75	1.61198	299.234	0.620354	6	56.566	224.261	89.8341	89.4125	1.06582	0.880305	K-Wm
3667	6473	95.4224	173.451	10862.1	1.81772	463.897	0.55014	6	87.6933	388.153	89.7247	117.631	1.25594	0.633957	K-Wm
3670	6481	130.741	234.108	19192.2	1.79063	686.749	0.558463	6	129.82	685.827	73.4429	156.361	1.39875	0.511116	K-Wm
3671	6482	60.3331	136.783	6600.5	2.26714	348.272	0.441085	6	65.836	235.866	101.524	91.6966	1.20958	0.683483	K-Wm
3677	6495	97.288	119.977	8092.66	1.23322	368.366	0.810887	6	69.6344	289.188	59.1266	101.534	1.15542	0.749069	K-Wm
3678	6496	78.3805	183.357	10869.7	2.33932	451.942	0.427474	6	85.4333	388.425	108.639	117.672	1.22315	0.66841	K-Wm
3679	6497	56.0723	138.333	5720.64	2.46705	329.789	0.405342	6	62.342	204.425	92.5048	85.3665	1.23032	0.660635	K-Wm
3680	6498	100.793	407.943	26397.8	4.04734	923.432	0.247076	6	174.562	943.315	85.5996	183.379	1.60371	0.388819	K-Wm
3681	6499	161.761	278.067	27593.1	1.719	824.217	0.581733	6	155.807	986.028	86.5183	187.485	1.40006	0.510161	K-Wm
3682	6509	162.116	256.112	25740.2	1.5798	732.412	0.63299	6	138.452	919.816	89.1288	181.08	1.28811	0.602686	K-Wm
3683	6510	115.354	250.49	20295.1	2.17149	659.249	0.460514	6	124.622	725.237	84.5597	160.791	1.30575	0.586518	K-Wm
3688	6515	98.1772	132.517	9684.77	1.34977	400.599	0.740867	6	75.7276	346.081	81.1112	111.073	1.1486	0.757982	K-Wm
3689	6520	61.3149	173.326	7218.42	2.82681	422.085	0.353756	6	79.7892	257.947	90.2671	95.8929	1.40179	0.508899	K-Wm
3690	6521	106.038	265.868	20265	2.50728	647.097	0.398838	6	122.325	724.16	117.9	160.671	1.28263	0.60785	K-Wm
3692	6523	114.344	222.609	19987.5	1.94683	583.674	0.513654	6	110.335	714.244	62.8726	159.567	1.16492	0.736897	K-Wm
3693	6524	120.527	140.411	11512.9	1.16497	464.014	0.858389	6	87.7154	411.407	82.1411	121.104	1.22024	0.671599	K-Wm
3694	6525	218.078	706.07	80353.1	3.23769	1770.15	0.308862	6	334.623	2871.38	64.4964	319.939	1.76204	0.322085	K-Wm
3698	6529	89.2943	162.53	8624.24	1.82017	442.532	0.549401	6	83.6544	308.184	123.186	104.816	1.34459	0.553123	K-Wm
3699	6530	87.4437	197.499	13697.1	2.25859	500.382	0.442755	6	94.5902	489.459	86.8108	132.093	1.2064	0.687091	K-Wm
3700	6537	98.064	168.527	11743.4	1.71854	468.352	0.581889	6	88.5353	419.646	10.9134	122.31	1.21949	0.672419	K-Wm
3701	6538	123.758	150.817	11518.5	1.21864	464.54	0.820585	6	87.8148	411.609	28.5444	121.133	1.22132	0.670409	K-Wm
3705	6548	149.743	226.223	21303.4	1.51075	621.831	0.661925	6	117.548	761.267	51.3748	164.736	1.20214	0.691979	K-Wm
3706	6549	142.87	221.171	19037	1.54806	627.358	0.645969	6	118.593	680.278	155.014	155.727	1.28298	0.607515	K-Wm
3707	6550	93.6888	155.647	7980.72	1.66132	440.447	0.60193	6	83.2603	285.188	129.094	100.829	1.39116	0.516706	K-Wm
3708	6551	83.6373	165.875	9350.32	1.98326	428.869	0.504219	6	81.0717	334.13	94.2018	109.139	1.25146	0.638508	K-Wm
3711	6561	82.7182	151.622	9297.13	1.83299	394.659	0.545557	6	74.6047	332.229	14.0362	108.828	1.15492	0.749712	K-Wm
3713	6566	115.233	151.376	11981.1	1.31366	459.635	0.761235	6	86.8876	428.14	106.874	123.542	1.18487	0.712294	K-Wm
3716	6569	165.236	225.075	21202.7	1.36214	685.203	0.734137	6	129.528	757.669	99.4623	164.347	1.32779	0.567208	K-Wm
3717	6570	143.2	268.643	23078.2	1.876	743.464	0.533049	6	140.541	824.691	145.582	171.461	1.38091	0.524411	K-Wm
3719	6581	104.661	177.573	13184.1	1.69665	486.546	0.589395	6	91.9746	471.128	121.321	129.596	1.19565	0.699507	K-Wm
3723	6585	106.681	193.052	13821.5	1.80962	523.73	0.552603	6	99.0039	493.905	66.9367	132.691	1.257	0.63289	K-Wm
3724	6590	69.7871	117.675	5631.66	1.6862	317.248	0.59305	6	59.9712	201.245	86.9872	84.7	1.19285	0.702797	K-Wm
3725	6591	85.0867	197.634	10836.9	2.32273	478.85	0.430527	6	90.5198	387.252	26.6498	117.495	1.29793	0.593602	K-Wm
3726	6592	182.847	282.133	30748.4	1.543	906.157	0.648089	6	171.296	1098.78	30.2358	197.914	1.45813	0.470333	K-Wm
3730	6602	109.018	164.933	12473.3	1.51289	477.217	0.660986	6	90.2111	445.726	100.787	126.054	1.20568	0.687921	K-Wm
3731	6603	143.099	164.262	15274.4	1.14789	537.532	0.871162	6	101.613	545.824	90.275	139.491	1.22723	0.663965	K-Wm
3735	6611	132.548	188.883	17425.3	1.42502	551.869	0.701745	6	104.323	622.686	79.3493	148.989	1.17964	0.718618	K-Wm
3737	6613	448.444	690.623	156067	1.54005	2911.7	0.649332	6	550.416	5576.98	39.691	445.882	2.07968	0.23121	K-Wm
3740	6622	77.6376	96.2598	5663.13	1.23986	298.949	0.806542	6	56.5121	202.369	1.57926	84.9363	1.12092	0.795887	K-Wm
3741	6623	140.297	189.63	17045	1.35164	558.086	0.739845	6	105.498	609.094	23.0698	147.354	1.20617	0.687359	K-Wm
3742	6624	88.6077	215.018	9635	2.42662	527.582	0.412095	6	99.7319	344.303	108.479	110.788	1.51659	0.434772	K-Wm
3747	6629	254.367	438.413	61545.9	1.72355	1278.69	0.580198	6	241.719	2199.32	107.663	280.004	1.45436	0.472776	K-Wm
3748	6630	73.1621	169.536	8753.24	2.31726	421.175	0.431544	6	79.6172	312.794	86.7468	105.597	1.27023	0.619774	K-Wm
3749	6637	141.68	196.127	17473.8	1.38429	639.68	0.72239	6	120.923	624.42	37.3658	149.197	1.36544	0.536355	K-Wm
3750	6638	139.354	167.157	10765.6	1.19951	528.054	0.833674	6	99.8211	384.705	147.545	117.108	1.43603	0.484923	K-Wm
3752	6648	235.836	364.12	45053.5	1.54396	1162.2	0.647686	6	219.698	1609.97	101.485	239.568	1.54498	0.418941	K-Wm
3754	6650	99.5125	172.139	13350.1	1.72982	484.42	0.578095	6	91.5727	477.061	96.7098	130.409	1.183	0.714548	K-Wm
3758	6654	167.128	318.838	36232.5	1.90775	977.63	0.524178	6	184.807	1294.75	83.4765	214.84	1.44921	0.476145	K-Wm
3759	6658	168.499	246.906	25497.2	1.46533	689.692	0.682442	6	130.376	911.132	135.067	180.224	1.21875	0.673244	K-Wm
3760	6659	136.282	249.505	23683.8	1.8308	707.397	0.546211	6	133.723	846.33	58.4823	173.696	1.29701	0.594449	K-Wm
3761	6660	150.912	199.796	18242	1.32392	633.104	0.755334	6	119.679	651.87	34.1616	152.441	1.32265	0.571625	K-Wm
3762	6661	111.379	150.878	10389.3	1.35463	423.726	0.738208	6	80.0994	371.256	70.3462	115.042	1.173	0.726784	K-Wm
3763	6662	266.656	877.116	128746	3.28932	2479.42	0.304014	6	708.207	8016.66	107.638	404.978	1.94979	0.26304	K-Wm
3764	6663	117.93	167.73	11900.8	1.42229	493.001	0.703094	6	93.1949	425.268	95.8468	123.127	1.27516	0.614991	K-Wm
3765	6664	95.4998	179.276	10262.4	1.87724	499.834	0.532698	6	94.4866	366.722	90.1825	114.338	1.39222	0.515925	K-Wm
3767	6668	110.205	143.337	11555.6	1.30064	457.347	0.768854	6	86.455	412.933	38.6355	121.328	1.20048	0.693887	K-Wm
3772	6673	137.648	287.663	18966.8	2.08985	806.942	0.478503	6	152.541	677.77	64.7128	155.44	1.6533	0.365846	K-Wm
3774	6681	133.1	158.377	14446.5	1.18991	484.407	0.840396	6	91.5704	516.241	99.402	135.658	1.13719	0.773271	K-Wm
3776	6683	107.384	206.386	15114.2	1.92194	546.983	0.520309	6	103.4	540.099	95.773	138.758	1.25541	0.634492	K-Wm
3778	6685	124.146	267.381	25795	2.15377	726.359	0.464303	6	137.308	921.772	93.8141	181.273	1.27611	0.614076	K-Wm
3779	6691	193.508	208.233	28847.6	1.07609	671.624	0.929288	6	126.961	1030.86	32.6737	191.699	1.11578	0.803243	K-Wm
3782	6694	108.548	193.156	15075.3	1.77945	513.807	0.561971	6	97.1279	538.711	30.5766	138.579	1.18079	0.717228	K-Wm
3788	6703	110.131	118.472	9503.17	1.07574	384.13	0.929595	6	72.6144	339.592	4.39871	110.027	1.11186	0.808912	K-Wm
3789	6704	63.6073	168.488	7220.73	2.64887	395.066	0.377519	6	74.6817	258.03	97.1739	95.9082	1.31185	0.581074	K-Wm
3790	6712	94.5854	228.435	16260.1	2.41512	576.265	0.414058	6	108.935	581.048	94.16	143.922	1.27516	0.614991	K-Wm
3791	6713	162.593	224.942	16302.4	1.38347	696.592	0.722822	6	131.681	582.56	133.515	144.109	1.53942	0.421973	K-Wm
3792	6714	110.183	233.77	14568	2.12165	663.738	0.471331	6	125.47	520.582	92.1076	136.228	1.55168	0.415334	K-Wm
3793	6715	132.927	264.844	20134	1.9924	658.217	0.501907	6	124.427	719.479	42.5104	160.151	1.30891	0.583688	K-Wm
3794	6716	116.275	173.674	13827	1.49365	497.312	0.669502	6	94.0099	494.103	170.538	132.718	1.19336	0.702199	K-Wm
3795	6717	102.243	146.061	10054.1	1.42857	427.629	0.7	6	80.8373	359.28	175.601	113.172	1.20337	0.690555	K-Wm
3796	6718	205.679	321.255	35430.6	1.56192	1024.84	0.640238	6	193.731	1266.1	147.381	212.449	1.53629	0.423698	K-Wm
3800	6723	175.478	269.051	22582.3	1.53324	863.822	0.652213	6	163.293	806.968	99.816	169.609	1.62198	0.38011	K-Wm
3801	6724	110.172	136.686	9844.04	1.24066	431.92	0.806023	6	81.6485	351.773	129.289	111.983	1.22835	0.662759	K-Wm
3802	6725	130.693	203.696	17793.5	1.55858	552.879	0.64161	6	104.514	635.844	97.0392	150.555	1.16951	0.731124	K-Wm
3803	6726	121.289	283.46	21184.9	2.33706	711.161	0.427888	6	134.435	757.033	92.2022	164.278	1.37867	0.526114	K-Wm
3804	6727	121.673	219.559	16697.1	1.8045	579.428	0.554171	6	109.533	596.662	72.8326	145.843	1.26527	0.624642	K-Wm
3806	6729	195.908	238.05	28913.2	1.21511	751.62	0.822971	6	142.083	1033.2	90	191.917	1.24726	0.642819	K-Wm
3809	6732	156.121	284.781	22601.5	1.82411	768.21	0.548213	6	145.219	807.655	72.7709	169.681	1.44184	0.481024	K-Wm
3810	6733	101.253	121.194	8292.87	1.19695	403.509	0.835457	6	76.2778	296.342	77.9371	102.782	1.25028	0.639717	K-Wm
3811	6742	88.3927	156.33	8190.4	1.76858	411.812	0.565424	6	77.8472	292.681	130.536	102.145	1.28396	0.606594	K-Wm
3812	6743	206.719	242.523	33279.9	1.1732	852.581	0.852369	6	161.168	1189.24	174.989	205.9	1.31871	0.575043	K-Wm
3813	6744	71.4722	134.781	6395.05	1.88578	360.013	0.530284	6	68.0553	228.524	134.82	90.2583	1.27028	0.619724	K-Wm
3818	6753	57.81	142.884	6040.64	2.47162	343.363	0.404593	6	64.9079	215.86	88.9953	87.7216	1.24657	0.643525	K-Wm
3819	6754	115.556	139.209	10188.2	1.20468	434.774	0.830093	6	82.188	364.07	152.254	113.923	1.21541	0.676952	K-Wm
3821	6756	184.526	220.746	28894.1	1.19629	803.631	0.835917	6	151.915	1032.52	36.1556	191.853	1.33401	0.561934	K-Wm
3822	6760	225.209	384.501	40008.5	1.70731	1128.24	0.585717	6	213.279	1429.69	29.1975	225.757	1.59159	0.394763	K-Wm
3823	6761	73.9333	115.266	6057.1	1.55906	306.679	0.641412	6	57.9733	216.448	160.599	87.8411	1.11188	0.808885	K-Wm
3824	6762	170.641	221.791	24094.5	1.29976	693.909	0.769375	6	131.174	861.008	95.2197	175.196	1.26139	0.628498	K-Wm
3825	6763	241.781	522.267	67321.1	2.16008	1327.72	0.462946	6	250.987	2405.69	81.6942	292.847	1.4439	0.479652	K-Wm
3828	6766	60.5087	159.019	7026.07	2.62804	366.343	0.380512	6	69.2519	251.074	92.6461	94.6066	1.23321	0.657548	K-Wm
3829	6767	85.0966	131.931	7819.77	1.55036	386.577	0.64501	6	73.077	279.436	146.31	99.8073	1.23352	0.65722	K-Wm
3833	6779	81.3053	171.83	10880.1	2.1134	457.385	0.473172	6	86.4623	388.796	84.6405	117.728	1.23729	0.653217	K-Wm
3834	6780	100.847	174.327	10518.3	1.72863	453.229	0.578494	6	85.6765	375.867	73.5017	115.755	1.24695	0.643132	K-Wm
3835	6786	93.48	122.667	9024.07	1.31223	348.055	0.762061	6	65.795	322.471	52.1393	107.218	1.03384	0.935611	K-Wm
3836	6787	115.14	196.908	14467.2	1.71015	512.89	0.584743	6	96.9547	516.978	105.808	135.755	1.2032	0.690756	K-Wm
3837	6788	98.8059	122.696	7508.75	1.24179	376.425	0.805292	6	71.1579	268.322	168.996	97.8023	1.22575	0.665579	K-Wm
3840	6798	128.187	172.441	16084	1.34523	521.726	0.743366	6	98.625	574.754	98.9577	143.14	1.16078	0.742159	K-Wm
3841	6799	144.252	205.496	20267.8	1.42457	595.433	0.701967	6	112.558	724.262	86.4661	160.683	1.18014	0.718011	K-Wm
3842	6800	119.928	219.005	17183.7	1.82614	641.677	0.547604	6	121.3	614.051	94.4999	147.953	1.38122	0.524171	K-Wm
3846	6804	134.582	185.92	15551.8	1.38146	547.502	0.723873	6	103.497	555.738	69.6589	140.752	1.2388	0.651629	K-Wm
3847	6816	79.0922	128.496	7731.63	1.62464	354.806	0.615521	6	67.071	276.286	109.983	99.2432	1.13857	0.771399	K-Wm
3848	6817	81.8548	174.215	8772.5	2.12834	429.234	0.46985	6	81.1406	313.482	95.2667	105.713	1.29312	0.598033	K-Wm
3849	6818	205.011	254.647	32342.1	1.24211	906.17	0.80508	6	171.299	1155.73	82.8443	202.978	1.42177	0.494697	K-Wm
3850	6819	72.1876	131.172	6016.23	1.8171	342.34	0.550327	6	64.7145	214.987	160.551	87.5442	1.24537	0.644763	K-Wm
3851	6825	151.81	336.001	27619.8	2.2133	833.37	0.451813	6	157.537	986.982	114.254	187.575	1.41492	0.499498	K-Wm
3852	6826	96.9962	218.75	11503.6	2.25524	551.53	0.443411	6	104.259	411.077	63.4349	121.055	1.45097	0.474991	K-Wm
3854	6828	137.452	295.815	23066.2	2.15213	770.457	0.464656	6	145.644	824.26	63.8263	171.417	1.43142	0.488055	K-Wm
3855	6829	91.6285	106.861	7093.67	1.16624	334.281	0.857456	6	63.1911	253.489	167.905	95.0607	1.11991	0.797329	K-Wm
3856	6834	86.8471	156.274	9107.88	1.79941	420.863	0.555737	6	79.5581	325.466	9.22441	107.714	1.24433	0.645842	K-Wm
3858	6836	153.36	215.315	14971.8	1.40398	689.202	0.71226	6	130.284	535.013	23.6814	138.103	1.58933	0.395888	K-Wm
3859	6837	168.014	203.439	20766.5	1.21084	662.838	0.82587	6	125.3	742.081	82.8383	162.647	1.29787	0.593659	K-Wm
3860	6838	68.7184	119.116	6217.28	1.73339	310.701	0.576906	6	58.7337	222.172	128.981	88.9949	1.11186	0.808916	K-Wm
3861	6839	77.2845	157.689	9113.94	2.04037	409.818	0.490108	6	77.4704	325.683	64.7511	107.75	1.21128	0.681574	K-Wm
3862	6840	169.684	286.458	21030.2	1.68819	851.991	0.592351	6	161.057	751.506	81.7483	163.677	1.65775	0.363884	K-Wm
3863	6841	78.9233	115.472	6421.01	1.46309	319.752	0.683486	6	60.4447	229.452	108.662	90.4413	1.12595	0.788798	K-Wm
3867	6845	187.954	388.262	39512.5	2.06572	1134.38	0.484092	6	214.438	1411.96	115.977	224.353	1.61026	0.385664	K-Wm
3871	6857	116.668	205.196	15689.4	1.75881	536.831	0.568568	6	101.48	560.653	80.7239	141.373	1.20932	0.683784	K-Wm
3873	6859	128.389	150.804	13280.6	1.17458	482.57	0.851365	6	91.2231	474.577	172.875	130.069	1.18156	0.716286	K-Wm
3875	6868	45.5741	153.726	5640.7	3.37309	363.109	0.296464	6	68.6407	201.568	82.1595	84.768	1.36419	0.537339	K-Wm
3876	6869	132.496	143.068	14101.9	1.07979	472.656	0.926107	6	89.3489	503.926	36.8699	134.031	1.12308	0.792826	K-Wm
3878	6871	88.6968	211.112	11338.4	2.38016	518.575	0.42014	6	98.0294	405.174	76.3383	120.183	1.37417	0.529564	K-Wm
3879	6878	126.063	175.425	12178.2	1.39157	516.478	0.718613	6	97.6329	435.183	128.258	124.554	1.32058	0.573416	K-Wm
3880	6879	55.2978	148.8	5776.64	2.69089	355.06	0.371624	6	67.1192	206.426	93.399	85.7833	1.31817	0.57552	K-Wm
3882	6881	96.5073	228.924	14600.5	2.37209	582.544	0.421569	6	110.122	521.743	98.1301	136.38	1.36035	0.540382	K-Wm
3883	6882	63.6777	185.371	8439.75	2.91108	453.441	0.343515	6	85.7167	301.591	89.9711	103.688	1.39271	0.515557	K-Wm
3884	6883	51.9915	148.413	6126.61	2.85457	343.797	0.350316	6	64.99	218.932	90.213	88.3437	1.23936	0.651038	K-Wm
3885	6888	129.106	143.514	11968.2	1.11159	477.041	0.89961	6	90.1778	427.679	36.0249	123.475	1.2304	0.660554	K-Wm
3886	6889	121.718	155.548	13013	1.27794	460.383	0.782511	6	87.0289	465.014	128.66	128.752	1.13877	0.771133	K-Wm
3887	6890	125.31	186.834	12754.4	1.49097	564.231	0.670705	6	106.66	455.772	106.23	127.466	1.40972	0.503194	K-Wm
3889	6892	91.4482	130.982	8607.7	1.43231	385.395	0.698172	6	72.8535	307.592	104.826	104.715	1.17211	0.727887	K-Wm
3890	6893	76.5453	111.902	6548.91	1.46191	309.487	0.684037	6	58.5042	234.023	105.945	91.3376	1.0791	0.858762	K-Wm
3891	6894	88.8499	125.403	7142.8	1.4114	350.522	0.708514	6	66.2613	255.245	28.1333	95.3892	1.17027	0.730174	K-Wm
3892	6896	90.6262	127.567	7712.93	1.40762	398.711	0.710419	6	75.3707	275.618	30.2564	99.1231	1.28101	0.609387	K-Wm
3893	6897	85.896	94.0482	5620.77	1.09491	302.079	0.91332	6	57.1037	200.856	63.7538	84.6181	1.13691	0.773651	K-Wm
3894	6898	147.679	202.535	17309.1	1.37146	579.036	0.729151	6	109.459	618.534	98.4222	148.492	1.24186	0.648415	K-Wm
3896	6905	91.5317	122.961	8450.93	1.34337	371.302	0.744394	6	70.1894	301.99	98.9987	103.757	1.13967	0.76991	K-Wm
3897	6906	142.917	183.261	19126.4	1.28229	580.465	0.779856	6	109.729	683.474	25.3495	156.092	1.18431	0.71297	K-Wm
3898	6907	74.657	109.919	5763.16	1.47232	301.997	0.679198	6	57.0882	205.944	111.801	85.6832	1.12248	0.793682	K-Wm
3900	6918	69.95	149.737	7283.49	2.14063	382.808	0.467152	6	72.3645	260.272	107.65	96.3241	1.26566	0.624262	K-Wm
3901	6919	73.3157	125.182	6040.02	1.70743	324.62	0.585674	6	61.3648	215.838	81.8699	87.7171	1.17859	0.719909	K-Wm
3905	6923	75.6421	112.564	6400.11	1.48811	319.744	0.671992	6	60.4431	228.705	92.9229	90.294	1.12775	0.786271	K-Wm
3907	6931	84.589	117.152	7731.7	1.38496	350.357	0.722045	6	66.23	276.289	88.8257	99.2436	1.12429	0.791123	K-Wm
3909	6933	104.018	120.429	8658.42	1.15777	351.303	0.863727	6	113.423	631.183	131.186	105.023	1.06529	0.881178	K-Wm
3910	6934	153.595	254.348	25906.9	1.65596	735.656	0.603878	6	139.065	925.77	89.9807	181.666	1.28965	0.601249	K-Wm
3911	6935	235.81	622.769	70697.3	2.64098	1701.88	0.378648	6	321.717	2526.34	83.8298	300.1	1.80607	0.306572	K-Wm
3912	6941	106.346	176.049	10599.1	1.65544	477.919	0.604069	6	90.3438	378.755	90.6562	116.198	1.30986	0.582843	K-Wm
3913	6942	108.972	184.89	13316.9	1.69667	509.369	0.589391	6	96.2891	475.872	87.8789	130.246	1.24548	0.644653	K-Wm
3914	6943	130.506	200.959	18307.6	1.53984	571.004	0.649416	6	107.94	654.215	86.4237	152.715	1.19077	0.705251	K-Wm
3915	6944	71.1088	137.615	7375.44	1.93527	369.52	0.516724	6	69.8526	263.558	93.3665	96.9302	1.21409	0.678424	K-Wm
3916	6951	92.6945	126.961	8514.33	1.36967	366.695	0.730104	6	69.3186	304.256	94.7636	104.146	1.12133	0.795298	K-Wm
3922	6957	73.1376	210.303	11216.8	2.87545	507.17	0.347772	6	95.8733	400.828	91.3175	119.536	1.35121	0.547713	K-Wm
3923	6958	113.316	236.728	16953.3	2.0891	617.961	0.478675	6	116.817	605.821	61.153	146.958	1.33918	0.5576	K-Wm
3925	6963	56.1975	147.833	6089.78	2.6306	340.82	0.380142	6	64.4272	217.616	86.5466	88.0777	1.23234	0.658478	K-Wm
3927	6965	158.581	274.317	28512.8	1.72982	794.274	0.578095	6	150.146	1018.89	110.225	190.583	1.32726	0.56766	K-Wm
3928	6966	79.8074	121.165	6727.22	1.51822	331.92	0.658668	6	62.7449	240.394	130.758	92.5727	1.14188	0.766933	K-Wm
3929	6967	90.5284	176.652	10468.8	1.95134	448.928	0.512467	6	84.8635	374.097	64.0759	115.482	1.23804	0.652426	K-Wm
3933	6975	137.636	311.486	26050.7	2.26312	775.443	0.441869	6	146.587	930.911	98.4679	182.169	1.35564	0.544139	K-Wm
3934	6976	87.9582	111.889	6529.42	1.27206	324.188	0.786124	6	61.2831	233.326	112.732	91.2016	1.13205	0.780318	K-Wm
3936	6978	71.1961	167.63	8249.24	2.35448	418.411	0.424722	6	79.0947	294.783	81.4838	102.511	1.29987	0.591831	K-Wm
3939	6981	113.78	258.251	17314.8	2.26974	681.749	0.440579	6	128.875	618.737	78.3091	148.516	1.46191	0.467906	K-Wm
3940	6989	132.489	169.659	16647.9	1.28055	533.82	0.780915	6	100.911	594.907	124.695	145.628	1.1674	0.73377	K-Wm
3941	6990	129.188	161.502	13720.5	1.25013	486.55	0.799918	6	91.9755	490.296	146.11	132.206	1.17205	0.727954	K-Wm
3942	6991	82.3878	134.464	7151.3	1.63209	355.241	0.612711	6	67.1533	255.549	96.8706	95.446	1.18532	0.711752	K-Wm
3945	6994	115.731	139.407	11106.8	1.20457	421.364	0.830171	6	79.653	396.898	89.0858	118.949	1.12815	0.785714	K-Wm
3946	6995	113.884	187.223	13434.1	1.64397	558.988	0.608282	6	105.669	480.064	71.2404	130.819	1.36083	0.540001	K-Wm
3947	6996	100.904	168.612	12716.6	1.67102	474.834	0.598436	6	89.7608	454.421	81.5763	127.277	1.18813	0.708394	K-Wm
3948	6997	64.3902	149.601	6959.19	2.32335	369.119	0.430412	6	69.7767	248.684	80.8782	94.1552	1.24851	0.641529	K-Wm
3950	7004	143.647	206.794	20903.5	1.4396	619.472	0.69464	6	117.103	746.979	79.1145	163.183	1.20897	0.684172	K-Wm
3955	7012	121.572	178.497	13087.1	1.46824	504.138	0.681086	6	95.3002	467.661	125.918	129.118	1.24346	0.646745	K-Wm
[truncated: 6,956 more rows]

## Sheet: Qz
OBJECTID	TARGET_FID	Width	Length	Area	Aspect Ratio	Perimeter	Roundness	Mineral Code	Shape_Length	Shape_Area	Length Orientation (Clockwise from vertical direction: 0°; 180°)	Equivalent Diameter	Shape Factor 1	Shape Factor 2	Mineral
3	259	128.603	282.509	23085.7	2.19676	791.158	0.455216	1	149.557	824.956	115.017	171.489	1.46925	0.46324	qz
56	470	75.7769	171.392	8245.32	2.26179	432.928	0.442127	1	81.8389	294.643	98.6071	102.487	1.34529	0.552543	qz
58	473	90.3336	221.597	11167.9	2.45309	529.047	0.407649	1	100.009	399.079	108.435	119.275	1.41259	0.501154	qz
61	480	98.9177	140.624	8124.83	1.42163	398.156	0.703419	1	75.2658	290.337	145.152	101.735	1.24638	0.64372	qz
67	489	168.712	226.691	24450.5	1.34366	762.694	0.744238	1	144.177	873.73	90.0196	176.486	1.37629	0.527931	qz
79	521	98.6613	158.036	10451.5	1.6018	436.555	0.624296	1	82.5246	373.479	158.516	115.386	1.20491	0.688793	qz
80	526	100.354	116.749	7504.48	1.16337	356.039	0.85957	1	67.3042	268.169	30.1939	97.7745	1.15969	0.743558	qz
90	544	89.7416	134.647	6623.99	1.50038	380.563	0.666498	1	71.94	236.705	44.8884	91.8597	1.31938	0.574456	qz
94	551	122.79	362.094	24864.1	2.94888	911.458	0.339111	1	172.298	888.508	98.1026	177.972	1.63101	0.375914	qz
95	552	55.5326	158.693	6717.37	2.85766	381.078	0.349936	1	72.0374	240.042	90.0359	92.5049	1.31196	0.580981	qz
96	553	76.4657	159.13	7809.28	2.08107	405.562	0.480523	1	76.6658	279.061	80.5893	99.7403	1.29496	0.596329	qz
102	564	77.2986	164.215	8392.94	2.12443	417.351	0.470715	1	78.8944	299.918	86.4971	103.4	1.28543	0.605201	qz
105	569	77.8489	189.261	10175.5	2.43113	459.54	0.411332	1	86.8695	363.618	90.874	113.853	1.28543	0.605203	qz
113	589	194.638	251.115	29112.7	1.29016	761.615	0.775095	1	143.973	1040.33	103.256	192.578	1.2595	0.630378	qz
115	592	149.062	380.404	43773.3	2.55199	945.841	0.391852	1	178.798	1564.22	97.8746	236.14	1.27561	0.614557	qz
121	601	118.915	226.797	20465.7	1.90723	616.648	0.524322	1	116.569	731.333	87.062	161.465	1.21627	0.675993	qz
127	608	58.0428	192.984	8822.32	3.32486	460.807	0.300765	1	87.1091	315.262	87.2834	106.012	1.38431	0.521837	qz
130	615	168.467	338.95	29400.4	2.01197	873.109	0.497025	1	165.049	1050.61	88.7112	193.527	1.4368	0.484403	qz
134	622	198.797	339.068	30328	1.7056	1070.54	0.586304	1	202.371	1083.76	59.9336	196.556	1.73455	0.332372	qz
137	628	157.482	218.957	23465.6	1.39036	645.326	0.719239	1	121.99	838.533	64.8922	172.894	1.18869	0.707723	qz
143	638	196.625	253.462	27675.5	1.28906	886.369	0.775757	1	167.556	988.972	86.7077	187.764	1.50339	0.442442	qz
147	647	130.893	189.495	15038.8	1.44771	530.143	0.690748	1	100.216	537.404	76.9681	138.411	1.21981	0.672073	qz
152	656	117.084	249.984	15914.8	2.13508	621.069	0.468367	1	117.404	568.708	117.979	142.385	1.38914	0.518215	qz
163	671	152.298	309.956	32005.6	2.03519	801.5	0.491355	1	151.512	1143.71	84.6245	201.92	1.26414	0.625763	qz
170	681	131.31	369.346	32783.7	2.81278	884.786	0.35552	1	167.256	1171.51	88.1179	204.359	1.37884	0.525983	qz
171	682	115.413	204.229	15730.1	1.76954	530.166	0.565118	1	100.221	562.109	126.419	141.557	1.19276	0.702905	qz
177	689	190.066	531.277	65232.1	2.79523	1404.26	0.357753	1	265.455	2331.04	95.4564	288.268	1.55139	0.415487	qz
180	693	111.499	334.575	25812.3	3.00069	801.937	0.333257	1	151.595	922.392	137.856	181.334	1.40842	0.504122	qz
183	699	88.7342	228.711	14612.9	2.57749	558.107	0.387975	1	105.502	522.186	99.354	136.437	1.30273	0.589239	qz
187	704	114.635	163.797	13930.6	1.42886	496.908	0.69986	1	93.9334	497.804	88.1769	133.214	1.18794	0.708612	qz
194	714	172.784	367.375	36899.9	2.1262	917.025	0.470322	1	173.351	1318.6	78.2749	216.809	1.34702	0.551127	qz
196	716	108.238	178.762	13596.8	1.65157	497.364	0.605486	1	94.0197	485.875	129.522	131.608	1.20354	0.690361	qz
203	727	78.2096	189.939	9821.61	2.42859	466.179	0.411761	1	88.1245	350.971	122.69	111.855	1.32729	0.567633	qz
204	728	131.702	334.399	33778.1	2.53905	822.204	0.393847	1	155.426	1207.05	92.1425	207.435	1.26231	0.627576	qz
241	778	79.836	191.062	10757	2.39318	496.974	0.417854	1	93.946	384.396	95.9061	117.061	1.35205	0.547032	qz
299	846	128.2	285.762	22095.1	2.22904	740.589	0.448624	1	139.998	789.558	88.7494	167.769	1.40584	0.505977	qz
302	849	155.706	274.989	30005.9	1.76608	763.236	0.566226	1	144.279	1072.25	64.0413	195.51	1.24326	0.64696	qz
304	855	314.231	910.132	157265	2.89638	2389.4	0.345258	1	451.682	5619.79	95.9188	447.591	1.70011	0.345974	qz
313	867	112.08	180.636	12239.7	1.61167	501.615	0.620474	1	94.8233	437.379	81.8699	124.868	1.27935	0.610967	qz
325	886	180.204	254.77	30512.7	1.41379	914.027	0.70732	1	172.784	1090.36	137.49	197.154	1.47647	0.458726	qz
338	902	115.664	184.957	13244.3	1.59909	493.588	0.625358	1	93.3059	473.278	56.3099	129.891	1.2102	0.68279	qz
356	921	111.052	162.216	13333.1	1.46073	448.489	0.684591	1	84.7806	476.454	76.0706	130.326	1.09595	0.832565	qz
361	927	191.806	279.969	35107.9	1.45965	801.538	0.685097	1	151.519	1254.56	107.676	211.479	1.20706	0.68635	qz
381	954	120.221	195.087	15624.7	1.62273	606.582	0.616246	1	114.666	558.342	95.7296	141.082	1.36927	0.533363	qz
402	979	100.549	111.239	9388.1	1.10631	374.811	0.903907	1	70.8527	335.48	0.0475201	109.359	1.09151	0.839349	qz
404	981	141.438	247.716	22139.2	1.75141	657.637	0.57097	1	124.317	791.134	103.652	167.937	1.24713	0.642953	qz
418	1001	145.459	467.306	37494.4	3.21263	1124.02	0.311271	1	212.48	1339.85	103.542	218.549	1.63793	0.372741	qz
429	1013	126.708	195.649	14803.4	1.54409	541.843	0.647631	1	102.428	528.994	103.33	137.324	1.2566	0.633293	qz
437	1022	92.1751	138.667	8715.07	1.50439	401.555	0.664723	1	75.9083	311.429	32.7352	105.366	1.21371	0.678844	qz
444	1030	123.414	195.099	13776.2	1.58085	597.495	0.632572	1	112.948	492.287	142.125	132.474	1.4364	0.484676	qz
446	1033	151.798	335.929	35042.5	2.21299	859.882	0.451877	1	162.549	1252.23	98.1715	211.282	1.29612	0.59526	qz
457	1045	113.195	177.07	12568.1	1.56428	469.115	0.63927	1	88.6795	449.116	46.2003	126.532	1.18073	0.717302	qz
473	1065	112.336	146.92	12262.1	1.30786	466.726	0.764609	1	88.228	438.18	82.7004	124.982	1.18928	0.707016	qz
553	1164	132.27	391.899	32054.2	2.96286	889.981	0.337512	1	168.238	1145.44	90.253	202.073	1.40263	0.508291	qz
555	1167	126.789	171.692	14262.9	1.35416	536.86	0.738467	1	101.486	509.679	66.5002	134.794	1.26842	0.62155	qz
561	1173	114.533	231.161	18673.7	2.01828	580.684	0.495471	1	109.77	667.298	60.3163	154.234	1.19903	0.69557	qz
637	1271	133.928	272.284	21600.1	2.03306	751.493	0.491869	1	142.059	771.87	104.658	165.88	1.44279	0.480391	qz
639	1273	89.8461	192.318	13345.2	2.14053	515.977	0.467174	1	97.5382	476.884	87.5248	130.385	1.2603	0.629583	qz
671	1311	77.9419	97.9364	5893.14	1.25653	300.54	0.795842	1	56.8129	210.589	86.1859	86.644	1.10467	0.819466	qz
679	1323	105.512	247.822	17057.4	2.34875	596.388	0.425758	1	112.739	609.54	93.7244	147.408	1.28848	0.602345	qz
700	1354	75.3967	150.82	8753.68	2.00036	397.774	0.499911	1	75.1935	312.809	61.6523	105.599	1.19963	0.694877	qz
707	1365	90.9669	122.513	7445.67	1.34679	360.899	0.742506	1	68.2228	266.068	101.31	97.3906	1.18015	0.717997	qz
736	1403	119.73	309.568	21577.4	2.58555	762.038	0.386765	1	144.053	771.06	84.8065	165.792	1.4638	0.466697	qz
737	1404	141.31	274.044	18463.3	1.93931	737.718	0.515647	1	139.455	659.777	56.3099	153.363	1.53194	0.426106	qz
744	1414	144.494	205.714	20872.7	1.42369	606.539	0.702403	1	114.658	745.877	94.5694	163.063	1.18461	0.712608	qz
748	1424	70.9443	113.246	6318.4	1.59626	324.196	0.626464	1	61.2846	225.785	100.834	89.7158	1.15082	0.755062	qz
749	1425	86.44	160.926	9799.36	1.8617	432.868	0.537142	1	81.8276	350.176	135	111.729	1.23385	0.656865	qz
750	1426	128.573	206.324	13697.7	1.60472	558.177	0.623162	1	105.515	489.482	89.8427	132.096	1.34571	0.552197	qz
762	1440	111.389	197.674	16101	1.77464	564.558	0.563496	1	106.722	575.363	88.0251	143.216	1.25541	0.634493	qz
770	1449	120.138	225.109	16326.9	1.87376	566.312	0.533688	1	107.053	583.437	108.034	144.217	1.25057	0.639416	qz
778	1457	156.632	260.34	26719	1.66211	757.811	0.601645	1	143.253	954.793	71.9661	184.491	1.30814	0.584371	qz
779	1458	160.599	334.286	35222.5	2.08149	920.494	0.480424	1	174.006	1258.66	78.1347	211.824	1.38394	0.522117	qz
782	1462	109.083	152.86	11477.1	1.40131	440.518	0.713618	1	83.2737	410.13	100.529	120.915	1.16025	0.742839	qz
790	1473	119.246	176.042	14142.1	1.4763	487.304	0.677371	1	92.118	505.361	101.924	134.221	1.15624	0.748001	qz
802	1488	99.691	208.468	11472.9	2.09114	537.02	0.478208	1	101.516	409.98	125.529	120.893	1.41468	0.499669	qz
808	1500	108.555	138.497	10969.7	1.27582	417.532	0.783807	1	78.9285	391.997	135.133	118.212	1.12486	0.790323	qz
812	1506	174.82	318.981	36869	1.82463	882.441	0.548058	1	166.813	1317.5	97.2833	216.718	1.29676	0.594674	qz
813	1507	163.85	265.719	23076.8	1.62172	816.314	0.61663	1	154.313	824.64	78.8484	171.456	1.51626	0.434961	qz
823	1519	124.149	163.158	13604.2	1.3142	494.482	0.760916	1	93.4748	486.141	83.9196	131.644	1.19624	0.698815	qz
824	1520	72.8483	149.85	6916.57	2.05701	369.442	0.486141	1	69.8377	247.161	117.462	93.8665	1.25345	0.636486	qz
825	1521	90.1063	100.957	6609.58	1.12042	328.722	0.892523	1	62.1403	236.191	89.9155	91.7598	1.1409	0.768257	qz
840	1541	90.4029	154.111	9520.72	1.70471	418.23	0.58661	1	79.0604	340.219	93.6649	110.129	1.20944	0.683644	qz
845	1549	94.1744	126.171	6612.6	1.33976	375.057	0.746401	1	70.8992	236.298	104.744	91.7807	1.30142	0.590429	qz
864	1573	92.4084	98.1722	6908.75	1.06237	315.704	0.941289	1	59.6794	246.881	81.0668	93.8134	1.07173	0.870622	qz
869	1583	78.1687	151.013	8478.56	1.93188	390.151	0.51763	1	73.7525	302.978	70.7574	103.926	1.19557	0.699596	qz
872	1586	116.423	126.925	10327.1	1.09021	447.911	0.917253	1	84.6712	369.035	0.236222	114.698	1.24368	0.646525	qz
885	1601	158.298	318.419	29507.7	2.01152	930.182	0.497138	1	175.838	1054.45	64.1944	193.88	1.52794	0.428341	qz
893	1617	209.569	345.255	48484.6	1.64745	929.752	0.606997	1	175.757	1732.58	85.7636	248.523	1.19144	0.704463	qz
906	1636	116.073	147.453	11447.9	1.27034	446.81	0.787188	1	84.4632	409.087	122.005	120.762	1.17832	0.720228	qz
912	1645	92.0787	139.729	9114.81	1.51749	386.69	0.658982	1	73.0984	325.714	81.4331	107.755	1.14286	0.765615	qz
925	1660	63.2047	148.502	6482.87	2.34953	392.22	0.425616	1	74.1436	231.663	92.3859	90.8759	1.37452	0.529295	qz
928	1663	99.5956	146.955	9396.52	1.47552	432.47	0.677729	1	81.7524	335.781	168.69	109.408	1.25886	0.631021	qz
933	1673	351.012	531.598	91215.1	1.51447	2185.82	0.660296	1	413.198	3259.53	108.711	340.878	2.04214	0.239789	qz
937	1680	106.434	205.593	15616.2	1.93164	530.849	0.517694	1	100.35	558.04	102.757	141.044	1.19864	0.696024	qz
954	1705	200.608	224.494	33541.1	1.11907	726.678	0.893601	1	137.368	1198.58	110.556	206.706	1.11959	0.797781	qz
971	1730	77.4345	102.861	6517.75	1.32836	315.747	0.75281	1	59.6876	232.909	51.9258	91.12	1.10356	0.821122	qz
977	1737	144.098	224.62	19962.9	1.55879	692.231	0.641522	1	130.857	713.366	104.404	159.469	1.38243	0.523252	qz
978	1738	121.437	188.28	16204.9	1.55043	503.448	0.644983	1	95.1697	579.074	37.9991	143.677	1.11593	0.80302	qz
1003	1775	131.924	254.003	21961.6	1.92538	693.745	0.519378	1	131.143	784.79	76.1104	167.262	1.32091	0.573133	qz
1010	1785	95.2325	188.212	12412.1	1.97634	480.677	0.505986	1	90.8653	443.542	89.932	125.744	1.21741	0.674727	qz
1015	1790	143.479	182.727	16213.1	1.27354	581.337	0.785213	1	109.894	579.37	116.565	143.714	1.28825	0.602562	qz
1016	1791	164.291	286.575	28232.4	1.74431	830.898	0.573292	1	157.07	1008.87	120.453	189.644	1.39534	0.51362	qz
1027	1804	111.096	127.553	9983.65	1.14813	414.789	0.870981	1	293.712	2929.31	149.534	112.774	1.17135	0.728828	qz
1034	1819	66.7067	141.009	5941.12	2.11386	351.932	0.473068	1	66.5279	212.303	63.0649	86.996	1.28834	0.602475	qz
1035	1820	79.3822	130.722	6505.33	1.64674	358.216	0.60726	1	67.7156	232.465	69.3168	91.0332	1.25318	0.636751	qz
1042	1831	77.3771	108.091	6468.78	1.39694	312.65	0.71585	1	59.102	231.159	95.7106	90.7771	1.09686	0.831182	qz
1048	1838	83.2135	174.22	8549	2.09365	450.696	0.477634	1	85.1977	305.495	177.138	104.357	1.37541	0.528614	qz
1049	1839	110.379	141	9154.97	1.27743	433.056	0.782824	1	81.8632	327.149	92.5931	107.993	1.27709	0.613138	qz
1056	1854	99.874	199.225	12257.8	1.99477	540.835	0.501312	1	102.237	438.026	104.6	124.96	1.37836	0.526347	qz
1057	1855	119.564	160.732	12745.8	1.34432	468.591	0.743871	1	88.5805	455.466	44.6602	127.423	1.17116	0.729071	qz
1059	1858	99.1391	121.608	7453.5	1.22664	367.428	0.815237	1	69.457	266.348	141.34	97.4418	1.20087	0.693435	qz
1061	1860	78.6203	206.952	10348.2	2.63229	506.628	0.379897	1	95.7708	369.789	100.553	114.815	1.40527	0.506381	qz
1066	1865	126.818	214.912	20290.7	1.69465	612.304	0.590094	1	115.747	725.079	101.139	160.773	1.2129	0.679755	qz
1075	1878	79.5488	126.27	6804.64	1.58732	343.901	0.629991	1	65.0097	243.161	101.9	93.1038	1.17635	0.722649	qz
1080	1888	205.849	531.58	50738.8	2.58238	1370.41	0.387239	1	259.056	1813.13	80.2116	254.235	1.71666	0.339337	qz
1086	1897	142.11	209.594	21651.1	1.47488	637.149	0.678023	1	120.444	773.693	125.218	166.075	1.22182	0.669866	qz
1087	1898	125.232	250.015	18022.7	1.99641	668.798	0.5009	1	126.427	644.035	66.9314	151.522	1.40569	0.506081	qz
1090	1901	102.783	168.565	10508.1	1.64	461.063	0.609755	1	87.1574	375.501	74.1241	115.698	1.26912	0.620858	qz
1093	1904	99.8349	244.188	15144.6	2.44592	601.879	0.408845	1	113.777	541.186	61.5287	138.897	1.38002	0.525085	qz
1100	1914	96.6115	201.052	12151.5	2.08104	535.102	0.48053	1	101.153	434.228	27.6746	124.417	1.36971	0.533022	qz
1101	1915	123.17	165.13	14191.3	1.34067	494.445	0.745898	1	93.4678	507.12	104.545	134.455	1.17115	0.729083	qz
1104	1918	133.217	228.292	20754.1	1.71368	616.834	0.583539	1	116.604	741.637	124.536	162.599	1.20815	0.685103	qz
1110	1927	102.82	240.397	17404.2	2.33803	660.668	0.42771	1	124.89	621.932	86.0572	148.899	1.41306	0.500815	qz
1113	1930	296.064	598.633	102014	2.02197	1709.22	0.494567	1	323.104	3645.42	82.7468	360.491	1.50999	0.438584	qz
1116	1934	65.214	148.841	5881.58	2.28235	372.111	0.438145	1	70.3424	210.176	59.2637	86.559	1.36909	0.533504	qz
1120	1941	130.067	244.024	18715.4	1.87615	639.902	0.533007	1	120.964	668.785	60.9051	154.406	1.31983	0.574065	qz
1124	1946	84.7838	111.17	7851.37	1.31122	345.166	0.762648	1	65.2489	280.566	0	100.009	1.09916	0.82771	qz
1125	1947	93.1017	123.907	7716.9	1.33088	363.109	0.751384	1	68.6406	275.76	38.6598	99.1486	1.16633	0.735121	qz
1133	1959	131.832	185.368	17877	1.40609	534.458	0.711193	1	101.032	638.827	85.0007	150.908	1.1279	0.786062	qz
1134	1960	82.7056	134.152	8398	1.62205	347.47	0.616504	1	65.6843	300.099	76.5228	103.432	1.06988	0.873637	qz
1138	1966	248.46	523.314	78605.4	2.10623	1457.07	0.474781	1	275.438	2808.93	96.5668	316.44	1.46642	0.465033	qz
1140	1970	65.9571	190.171	8452.52	2.88325	474.683	0.34683	1	89.7322	302.047	110.772	103.767	1.45685	0.47116	qz
1143	1978	105.575	256.386	18636.9	2.42848	638.105	0.411781	1	120.625	665.984	68.0028	154.082	1.31889	0.574885	qz
1145	1980	87.8879	181.765	10280.5	2.06814	451.319	0.483526	1	85.3155	367.371	57.5288	114.439	1.25598	0.633925	qz
1150	1989	297.049	401.334	51619.2	1.35107	1317.55	0.740154	1	249.064	1844.59	66.5331	256.431	1.63631	0.373481	qz
1155	1999	271.715	453.158	59911	1.66777	1368.85	0.599602	1	258.761	2140.9	87.7322	276.26	1.578	0.401593	qz
1156	2000	54.5523	202.431	7747.25	3.71076	448.52	0.269487	1	84.7863	276.845	78.1058	99.3434	1.43785	0.483698	qz
1157	2001	215.362	255.767	41448	1.18762	826.56	0.842024	1	156.25	1481.13	175.674	229.782	1.14559	0.76198	qz
1159	2005	97.9271	260.344	16405.5	2.65855	655.003	0.376145	1	123.819	586.243	30.8871	144.564	1.44296	0.480278	qz
1164	2015	131.438	219.528	17139.7	1.67021	616.713	0.598727	1	116.581	612.479	82.4096	147.763	1.32919	0.566012	qz
1166	2019	112.565	157.748	12545.1	1.40139	443.465	0.713575	1	83.8308	448.292	127.875	126.416	1.11719	0.801204	qz
1167	2020	93.3527	117.727	6965.15	1.26109	349.238	0.792962	1	66.0184	248.897	151.462	94.1956	1.18076	0.717263	qz
1168	2021	137.422	301.795	24421.4	2.19611	780.83	0.45535	1	147.605	872.69	78.9722	176.381	1.40986	0.503092	qz
1169	2022	127.294	415.997	31005.4	3.268	971.466	0.305997	1	183.642	1107.97	82.6871	198.739	1.55673	0.412641	qz
1170	2023	118.066	124.097	10437	1.05108	403.962	0.951403	1	76.3633	372.962	169.15	115.306	1.11573	0.803313	qz
1176	2036	118.207	249.563	16591.3	2.11125	686.893	0.473653	1	129.848	592.882	58.9124	145.38	1.50472	0.441662	qz
1177	2037	170.033	334.253	32805.6	1.96581	967.966	0.508696	1	182.98	1172.29	105.945	204.427	1.50797	0.439762	qz
1178	2038	145.938	202.05	17815.4	1.38449	565.573	0.722287	1	106.914	636.626	146.654	150.648	1.19563	0.699533	qz
1181	2045	147.649	198.115	16658.5	1.3418	623.383	0.745268	1	117.842	595.286	34.2869	145.675	1.36283	0.538415	qz
1184	2048	117.994	207.22	14972.7	1.75619	560.033	0.569414	1	105.866	535.045	102.265	138.107	1.29142	0.599602	qz
1187	2052	98.8095	134.641	8421.49	1.36263	374.714	0.733875	1	70.8344	300.938	139.869	103.576	1.15215	0.753319	qz
1189	2054	127.204	188.981	15525.6	1.48566	559.899	0.673104	1	105.841	554.8	59.0362	140.634	1.26792	0.622038	qz
1190	2055	62.1412	172.333	7939.06	2.77324	392.993	0.360589	1	74.2898	283.699	58.8095	100.566	1.24453	0.645638	qz
1191	2056	209.634	378.811	50641.3	1.80702	1049.56	0.553399	1	198.405	1809.65	119.932	253.991	1.31602	0.577401	qz
1196	2062	157.966	308.689	22826	1.95415	888.43	0.511732	1	167.945	815.678	177.035	170.522	1.65926	0.363223	qz
1197	2063	181.012	232.895	27436.1	1.28663	683.626	0.777226	1	129.23	980.419	71.0385	186.95	1.16456	0.737352	qz
1201	2069	175.766	322.71	35953	1.83602	917.663	0.544658	1	173.471	1284.76	96.1377	214.009	1.36559	0.536238	qz
1203	2071	116.524	217.865	17380.6	1.86971	554.353	0.534844	1	104.793	621.09	101.31	148.798	1.18648	0.710366	qz
1205	2077	85.6495	222.993	10963.4	2.60355	512.498	0.38409	1	96.8805	391.773	112.652	118.178	1.3811	0.524266	qz
1210	2084	72.707	280.554	13845.4	3.8587	626.543	0.259155	1	118.439	494.76	89.9931	132.806	1.50246	0.44299	qz
1213	2091	150.73	265.664	27697.9	1.76252	710.545	0.567371	1	134.318	989.772	98.9286	187.84	1.20468	0.689054	qz
1217	2096	96.0753	184.683	10477.9	1.92227	503.635	0.520217	1	95.2052	374.425	83.9838	115.532	1.3883	0.518839	qz
1218	2103	102.093	176.091	12395.6	1.72481	476.834	0.579775	1	90.1387	442.953	87.3974	125.661	1.20847	0.684739	qz
1220	2105	75.0752	115.479	6158.75	1.53817	308.083	0.650121	1	58.2387	220.08	74.1387	88.575	1.10771	0.814981	qz
1229	2118	87.5783	117.312	6790.46	1.33951	331.061	0.746542	1	62.5825	242.654	94.9174	93.0068	1.13361	0.778166	qz
1230	2119	158.183	282.864	29318.9	1.78821	792.204	0.559219	1	149.755	1047.7	104.235	193.259	1.30548	0.586762	qz
1231	2120	135.818	202.751	15981.4	1.49281	590.52	0.669879	1	111.63	571.089	72.5613	142.683	1.31805	0.575619	qz
1232	2121	117.815	183.11	15136.1	1.55422	563.176	0.643411	1	106.461	540.881	79.6952	138.858	1.29165	0.599396	qz
1235	2127	174.421	270.348	36156.8	1.54997	850.975	0.645173	1	160.865	1292.05	56.1229	214.615	1.26278	0.627113	qz
1241	2138	73.5634	165.8	7544.95	2.25384	403.681	0.443688	1	76.3103	269.616	80.0171	98.0378	1.31134	0.581525	qz
1242	2139	163.153	241.963	21956.5	1.48304	757.133	0.674289	1	143.125	784.606	96.4363	167.243	1.44177	0.48107	qz
1243	2147	212.104	520.939	60135	2.45605	1416.07	0.407158	1	267.688	2148.9	99.5523	276.776	1.6294	0.376658	qz
1244	2148	97.7948	160.667	10597.9	1.6429	422.199	0.60868	1	79.8108	378.712	58.3281	116.192	1.15721	0.74675	qz
1245	2149	143.173	219.56	23799	1.53353	649.642	0.65209	1	122.806	850.447	85.0713	174.118	1.18823	0.708271	qz
1246	2150	56.1112	199.313	8468.45	3.5521	452.728	0.281523	1	85.5818	302.616	86.489	103.864	1.38816	0.518942	qz
1251	2159	73.3874	151.361	6486.66	2.0625	371.233	0.48485	1	70.1764	231.798	104.52	90.9025	1.30059	0.591176	qz
1254	2162	323.756	932.353	159957	2.8798	2582.21	0.347246	1	488.13	5716.01	100.098	451.406	1.82177	0.301308	qz
1255	2163	86.2898	174.961	9439.94	2.0276	483.315	0.493194	1	91.364	337.332	77.2893	109.66	1.40363	0.507572	qz
1256	2164	109.229	194.918	14509.2	1.7845	527.622	0.560381	1	99.7394	518.481	96.2318	135.952	1.23596	0.654619	qz
1257	2167	83.5257	118.969	7325.72	1.42434	341.99	0.702081	1	64.6484	261.782	71.4388	96.603	1.12744	0.786706	qz
1259	2169	200.035	426.299	41562.2	2.13112	1112.09	0.469238	1	210.226	1485.21	94.1446	230.099	1.53921	0.42209	qz
1260	2170	128.303	151.512	15539.1	1.18089	485.789	0.84682	1	91.8315	555.283	93.6277	140.695	1.09961	0.82703	qz
1261	2171	121.754	158.57	13913.3	1.30238	473.263	0.767824	1	89.4638	497.187	99.4623	133.131	1.13212	0.780216	qz
1262	2172	183.791	245.176	31078.5	1.334	727.852	0.749628	1	137.59	1110.58	176.424	198.973	1.16498	0.736823	qz
1264	2176	98.3102	125.98	7968.12	1.28145	376.935	0.780366	1	71.2542	284.737	29.7449	100.75	1.1915	0.70439	qz
1266	2178	112.75	151.506	10372.9	1.34373	450.488	0.744197	1	85.1583	370.672	50.6689	114.952	1.24807	0.641985	qz
1268	2180	169.257	211.134	23711.3	1.24741	684.14	0.801659	1	129.327	847.315	121.259	173.797	1.25364	0.636291	qz
1274	2189	103.415	184.518	11337.2	1.78424	530.459	0.560462	1	100.276	405.129	110.585	120.176	1.40574	0.506047	qz
1275	2190	232.687	451.993	67162.9	1.94249	1184.3	0.514803	1	223.875	2400.04	113.254	292.503	1.28944	0.601447	qz
1276	2191	178.909	328.588	36502.6	1.83662	883.448	0.544479	1	167.003	1304.4	91.5911	215.639	1.30474	0.587423	qz
1277	2192	107.964	206.661	14413.1	1.91417	513.364	0.522419	1	97.0442	515.046	100.67	135.501	1.20657	0.686905	qz
1286	2212	106.051	212.894	14796.7	2.00746	547.055	0.498141	1	103.413	528.753	55.9255	137.293	1.26898	0.621002	qz
1287	2215	58.2101	131.858	5897.46	2.26521	329.209	0.441459	1	62.2322	210.743	55.4621	86.6758	1.20961	0.683459	qz
1290	2218	165.638	216.454	24953.5	1.3068	663.71	0.765231	1	125.465	891.704	33.8029	178.292	1.18554	0.711483	qz
1293	2228	88.6573	175.987	10622.8	1.98503	453.204	0.503772	1	85.6718	379.6	73.8392	116.328	1.24074	0.649591	qz
1295	2230	136.605	291.054	22067	2.13062	747.399	0.469347	1	141.285	788.556	101.513	167.663	1.41966	0.496168	qz
1296	2231	89.9703	148.553	10154.6	1.65113	423.097	0.605646	1	79.9805	362.869	15.5809	113.735	1.18472	0.712478	qz
1301	2239	64.0394	138.074	6896.42	2.15608	338.419	0.463805	1	63.9733	246.441	67.5611	93.7297	1.14987	0.756317	qz
1306	2244	98.3814	212.272	12611.6	2.15765	532.456	0.463468	1	100.653	450.671	111.281	126.751	1.33784	0.558718	qz
1309	2247	142.585	304.93	25592.6	2.13859	765.175	0.467598	1	144.646	914.54	126.657	180.56	1.34961	0.549012	qz
1313	2256	81.1226	169.024	9019.75	2.08356	416.412	0.479948	1	78.7167	322.317	64.8723	107.192	1.23717	0.653339	qz
1314	2257	178.956	215.236	26780.1	1.20273	650.898	0.83144	1	123.043	956.975	26.469	184.702	1.12231	0.793918	qz
1316	2259	78.7117	134.941	7293.72	1.71438	356.484	0.583302	1	67.3882	260.638	46.1821	96.3917	1.1778	0.720874	qz
1317	2260	219.663	389.592	41322.8	1.77359	1134.48	0.563827	1	214.457	1476.65	57.1652	229.435	1.57473	0.403262	qz
1318	2261	111.258	148.513	11014.3	1.33486	470.941	0.749142	1	89.0248	393.59	46.4514	118.452	1.26618	0.623751	qz
1321	2264	84.4869	125.153	6520.12	1.48133	353.537	0.67507	1	66.8313	232.994	153.54	91.1367	1.23541	0.655202	qz
1322	2265	84.7413	111.549	6037.56	1.31635	317.36	0.759675	1	59.9925	215.75	64.8227	87.6992	1.15246	0.752915	qz
1323	2266	68.7228	178.566	7173.05	2.59835	413.44	0.384859	1	78.1549	256.326	83.1713	95.591	1.37742	0.527071	qz
1326	2269	170.828	322.296	24236.8	1.88667	928.16	0.530035	1	175.456	866.092	66.5416	175.713	1.68225	0.353362	qz
1329	2272	91.2463	94.1944	6629.92	1.03231	335.77	0.968702	1	63.4726	236.917	174.341	91.9008	1.16357	0.738608	qz
1330	2277	193.656	244.828	25695.1	1.26424	785.683	0.790987	1	148.522	918.204	88.267	180.922	1.38302	0.522811	qz
1331	2278	100.169	152.604	10811.7	1.52347	451.776	0.656395	1	85.4019	386.351	96.7702	117.358	1.22598	0.665328	qz
1333	2280	99.8409	148.449	10399.8	1.48685	442.183	0.672562	1	83.5885	371.632	87.3822	115.101	1.22347	0.668052	qz
1334	2281	105.428	174.105	9859.9	1.65141	481.678	0.605544	1	91.0545	352.339	76.1791	112.073	1.36876	0.533762	qz
1336	2287	67.1082	151.854	7543.26	2.26282	383.184	0.441926	1	72.4355	269.555	80.0461	98.0268	1.2449	0.645259	qz
1337	2288	114.221	190.786	12583.4	1.67032	505.312	0.598688	1	95.5221	449.661	42.7094	126.609	1.27106	0.618967	qz
1339	2293	144.915	233.82	19757.4	1.6135	682.022	0.61977	1	128.927	706.024	43.353	158.647	1.36911	0.533487	qz
1340	2294	95.6615	116.109	7664.89	1.21375	351.881	0.823896	1	66.5181	273.902	131.414	98.8139	1.13409	0.777508	qz
1344	2304	115.775	157.097	14296	1.35691	498.035	0.736966	1	94.1465	510.861	109.06	134.95	1.17532	0.72391	qz
1345	2305	100.22	117.578	8232.09	1.1732	349.528	0.852373	1	66.0734	294.17	140.294	102.405	1.08701	0.84632	qz
1346	2306	117.209	190.81	15536	1.62794	522.005	0.614273	1	98.6777	555.172	88.4656	140.681	1.18171	0.716109	qz
1348	2312	116.837	170.047	14966.1	1.45542	505.172	0.687087	1	95.4957	534.808	72.3147	138.076	1.16517	0.73658	qz
1349	2313	85.0323	125.976	8456.3	1.4815	368.031	0.674991	1	69.571	302.182	89.8405	103.79	1.12927	0.784155	qz
1351	2315	117.262	135.748	11491.8	1.15765	412.387	0.863819	1	77.956	410.655	80.8213	120.993	1.08547	0.848725	qz
1352	2319	148.567	204.121	20550.9	1.37393	551.979	0.727837	1	104.344	734.377	42.4509	161.801	1.08646	0.847179	qz
1354	2321	116.619	144.578	10958.3	1.23975	422.466	0.806615	1	79.8612	391.59	128.66	118.151	1.13874	0.771168	qz
1355	2322	96.2797	114.712	7946.8	1.19144	364.67	0.839317	1	68.9358	283.976	76.3824	100.615	1.15428	0.750552	qz
1357	2325	48.3641	155.055	5892.12	3.20599	366.816	0.311916	1	69.3413	210.552	108.274	86.6365	1.3484	0.550003	qz
1358	2326	85.6042	147.513	8834.15	1.7232	388.015	0.580316	1	73.3488	315.684	63.4349	106.083	1.16485	0.736982	qz
1359	2330	135.211	270.422	27745.9	2	721.567	0.5	1	136.402	991.487	86.528	188.003	1.22231	0.669321	qz
1361	2332	80.7553	126.329	7240.25	1.56435	352.425	0.639245	1	66.621	258.727	74.3692	96.0378	1.16868	0.732165	qz
1363	2334	105.749	129.377	9922.77	1.22343	387.24	0.817372	1	73.2022	354.586	76.6444	112.43	1.0969	0.831119	qz
1364	2337	64.3809	172.14	7949.62	2.67378	409.355	0.374002	1	77.3829	284.076	107.849	100.632	1.29549	0.595847	qz
1366	2339	166.394	272.423	26453.1	1.63722	765.871	0.610793	1	144.777	945.289	110.371	183.571	1.32869	0.56644	qz
1367	2340	109.827	141.562	10423.6	1.28896	435.61	0.775822	1	82.3459	372.484	102.445	115.232	1.20391	0.689943	qz
1368	2345	146.367	199.867	20531.8	1.36552	607.829	0.732323	1	114.901	733.694	111.801	161.725	1.19694	0.697997	qz
1369	2346	131.797	235.317	17893.2	1.78544	685.534	0.560085	1	129.591	639.407	94.7416	150.977	1.44607	0.478212	qz
1370	2347	91.895	152.869	9380.87	1.66352	418.311	0.601134	1	79.0758	335.222	65.6398	109.317	1.21866	0.673339	qz
1372	2349	353.465	493.156	109590	1.3952	1516.9	0.716741	1	286.748	3916.17	100.509	373.638	1.29293	0.598206	qz
1376	2356	104.332	229.446	16040.8	2.1992	613.734	0.454711	1	116.018	573.212	94.8113	142.948	1.36733	0.53488	qz
1377	2357	181.804	307.317	27232.5	1.69037	893.783	0.591585	1	168.957	973.143	104.869	186.256	1.52825	0.428168	qz
1378	2358	111.788	208.709	14774.4	1.86701	567.877	0.535617	1	107.349	527.959	69.7751	137.189	1.31827	0.57543	qz
1379	2359	151.53	304.683	20421.9	2.01072	829.472	0.497335	1	156.8	729.768	96.3157	161.292	1.63779	0.372806	qz
1380	2360	123.43	173.608	12091	1.40653	503.06	0.710972	1	95.0965	432.066	71.7819	124.107	1.29091	0.600083	qz
1382	2368	78.6527	125.406	6784.57	1.59443	333.118	0.627183	1	62.9713	242.444	62.1027	92.9665	1.14115	0.76792	qz
1383	2369	85.5051	130.346	7951.51	1.52443	356.686	0.655984	1	67.4264	284.144	144.312	100.644	1.12867	0.784996	qz
1384	2373	88.2998	107.833	6067.5	1.22122	330.406	0.818857	1	62.4585	216.82	86.5568	87.9165	1.19687	0.698079	qz
1385	2374	277.869	587.883	73471.2	2.11569	1805.91	0.472659	1	341.382	2625.46	101.997	305.931	1.87993	0.282953	qz
1386	2375	223.29	351.695	53479.2	1.57506	959.535	0.634896	1	181.387	1911.06	74.1967	261.01	1.17077	0.729547	qz
1389	2378	144.803	186.438	18232.6	1.28753	566.81	0.77668	1	107.148	651.533	61.3534	152.401	1.18446	0.712791	qz
1390	2379	137.43	169.999	17450.4	1.23698	569.172	0.808419	1	107.594	623.581	94.3987	149.096	1.21576	0.67656	qz
1391	2380	62.522	140.282	6875.49	2.24373	347.487	0.445687	1	65.6876	245.693	112.727	93.5873	1.18248	0.71518	qz
1392	2385	68.9078	164.08	9289.01	2.38115	418.799	0.419965	1	79.1681	331.939	89.994	108.78	1.2261	0.665193	qz
1393	2386	147.913	231.534	24788.9	1.56534	655.009	0.63884	1	123.82	885.82	72.2325	177.703	1.17388	0.725692	qz
1394	2387	105.324	151.885	10231.4	1.44207	425.686	0.693448	1	80.47	365.614	114.735	114.165	1.18748	0.709159	qz
1395	2390	87.2308	147.719	9504.68	1.69342	402.474	0.59052	1	76.0821	339.646	94.3987	110.036	1.16486	0.736973	qz
1397	2392	69.8815	135.363	6671.46	1.93703	354.027	0.516253	1	66.9239	238.402	105.33	92.1883	1.22301	0.668555	qz
1400	2395	75.201	112.99	6545.3	1.5025	330.45	0.665556	1	62.467	233.893	98.4045	91.3124	1.15251	0.752847	qz
1401	2396	73.0763	96.4846	5663.43	1.32033	283.313	0.757388	1	53.5562	202.38	82.3602	84.9385	1.06226	0.886212	qz
1404	2405	104.173	337.525	21772.8	3.24004	862.522	0.308639	1	163.048	778.041	76.187	166.541	1.64937	0.36759	qz
1407	2408	232.68	369.771	55368.8	1.58918	1077.8	0.629254	1	203.742	1978.58	84.0825	265.582	1.29244	0.598663	qz
1408	2413	179.308	343.16	33621	1.9138	975.599	0.52252	1	184.423	1201.43	84.8438	206.952	1.50131	0.443667	qz
1409	2414	94.3755	181.627	11491.5	1.92452	453.028	0.519611	1	85.6386	410.644	109.888	120.991	1.19246	0.70326	qz
1412	2421	90.3213	173.666	10212.2	1.92276	463.654	0.520087	1	87.6473	364.928	66.8702	114.058	1.29461	0.59665	qz
1413	2422	229.523	729.297	112477	3.17745	1827.19	0.314718	1	345.405	4019.31	98.672	378.527	1.5373	0.423139	qz
1414	2423	94.4145	153.164	10294.9	1.62225	438.903	0.616427	1	82.9684	367.883	92.5853	114.518	1.22057	0.671233	qz
1415	2424	90.7067	127.786	9689.17	1.40878	387.611	0.709832	1	73.2725	346.238	100.008	111.099	1.11111	0.809997	qz
1416	2425	105.207	199.007	14105	1.89158	504.745	0.528658	1	95.415	504.036	81.8699	134.045	1.1992	0.695374	qz
1417	2428	99.2068	215.392	14508.4	2.17114	573.661	0.460587	1	108.443	518.453	114.146	135.949	1.34385	0.553733	qz
1418	2429	89.5007	190.698	12277	2.13069	499.612	0.469331	1	94.4446	438.714	73.7547	125.058	1.27231	0.617756	qz
1420	2431	179.463	240.721	26419.1	1.34134	766.862	0.745521	1	144.964	944.075	145.421	183.453	1.33126	0.564252	qz
1421	2434	67.7782	132.282	7007.46	1.95169	343.686	0.512377	1	64.9689	250.409	90.1752	94.4812	1.15847	0.745122	qz
1424	2437	189.933	246.074	27207.4	1.29558	804.947	0.771854	1	152.164	972.245	85.5511	186.17	1.37698	0.527403	qz
1425	2438	73.3252	115.652	6044.38	1.57725	318.765	0.634014	1	60.2581	215.993	103.425	87.7488	1.15691	0.747136	qz
1426	2442	132.911	199.152	16249.7	1.49839	533.032	0.667383	1	100.762	580.674	179.955	143.876	1.17988	0.718336	qz
1429	2445	120.436	232.282	18431.9	1.92867	598.705	0.518493	1	113.177	658.656	100.002	153.232	1.24432	0.645853	qz
1431	2447	109.405	221.415	17550.8	2.02381	575.583	0.494116	1	108.806	627.17	114.619	149.525	1.22593	0.66538	qz
1433	2452	161.897	189.203	21332	1.16866	596.873	0.855681	1	112.83	762.289	52.7528	164.847	1.15311	0.752068	qz
1437	2456	204.779	304.576	28663.7	1.48734	912.275	0.672343	1	172.453	1024.28	36.769	191.087	1.52042	0.432584	qz
1438	2457	240.631	832.419	93830	3.45931	2315.12	0.289075	1	437.642	3352.98	117.446	345.729	2.1326	0.219878	qz
1439	2458	103.3	164.816	11124.2	1.59551	444.11	0.626758	1	83.9528	397.519	105.559	119.042	1.18812	0.708398	qz
1440	2460	95.2841	201.906	13436.1	2.11899	561.979	0.471924	1	106.234	480.135	111.3	130.829	1.36801	0.534347	qz
1441	2461	77.986	206.426	10195.7	2.64696	507.548	0.377792	1	95.9447	364.337	104.554	113.965	1.41832	0.497108	qz
1443	2463	75.0044	109.741	5795.78	1.46312	305.927	0.68347	1	57.8312	207.11	175.842	85.9253	1.13388	0.777795	qz
1444	2464	96.6452	189.924	13187.1	1.96516	472.897	0.508864	1	89.3944	471.236	69.7939	129.611	1.16197	0.740641	qz
1449	2478	87.7952	149.056	9218.94	1.69776	396.278	0.58901	1	74.9109	329.435	26.2828	108.369	1.16457	0.737343	qz
1450	2479	87.366	172.615	9364.73	1.97576	437.273	0.506133	1	82.6603	334.645	117.596	109.223	1.275	0.615148	qz
1452	2481	107.832	151.406	10848.9	1.40409	426.981	0.712205	1	80.7148	387.681	35.6876	117.56	1.1567	0.747409	qz
1453	2482	117.261	223.709	15901.6	1.90779	560.804	0.524166	1	106.012	568.237	174.289	142.326	1.25486	0.635051	qz
1454	2483	158.936	225.095	19163.3	1.41626	632.746	0.706083	1	119.612	684.792	4.84504	156.243	1.28973	0.601175	qz
1455	2484	86.1994	185.637	10036.1	2.15358	457.422	0.464344	1	86.4693	358.635	125.349	113.07	1.28837	0.602446	qz
1456	2492	156.969	317.608	23378.7	2.02338	820.991	0.494223	1	155.197	835.428	89.113	172.574	1.51507	0.435646	qz
1461	2497	198.967	352.5	54719.6	1.77165	996.446	0.564445	1	188.364	1955.38	92.8051	264.02	1.20195	0.69219	qz
1465	2510	83.0071	125.495	6662.36	1.51186	337.478	0.661438	1	63.7956	238.077	115.456	92.1253	1.16664	0.734726	qz
1466	2511	114.472	208.46	16088.7	1.82106	537.178	0.549132	1	101.546	574.922	67.8471	143.161	1.19499	0.700283	qz
1467	2512	147.083	172.366	16771.6	1.1719	543.842	0.853318	1	102.806	599.324	131.909	146.168	1.18493	0.712226	qz
1469	2517	151.276	199.656	20062.4	1.31981	633.801	0.757685	1	119.811	716.921	50.8231	159.866	1.2626	0.627287	qz
1470	2518	80.4307	179.269	9242.62	2.22886	431.428	0.44866	1	81.5555	330.281	65.0259	108.508	1.26624	0.623688	qz
1472	2520	193.909	262.807	30181.8	1.35531	860.997	0.737838	1	162.759	1078.53	88.8488	196.082	1.39841	0.511366	qz
1473	2521	72.25	132.409	7609.1	1.83265	361.539	0.545657	1	68.3439	271.908	89.9637	98.4537	1.16948	0.731159	qz
1474	2522	164.63	248.81	25372	1.51133	743.778	0.661669	1	140.601	906.659	112.251	179.781	1.31756	0.576048	qz
1479	2529	145.243	203.2	19688.7	1.39903	598.747	0.714779	1	113.185	703.569	174.603	158.37	1.20404	0.689795	qz
1480	2530	101.728	219.12	13170	2.15398	598.882	0.464257	1	113.21	470.624	153.435	129.526	1.47249	0.461204	qz
1481	2534	90.5425	181.204	10377	2.00131	486.966	0.499672	1	92.054	370.816	166.605	114.974	1.34887	0.54962	qz
1482	2535	119.848	145.461	12350.5	1.21371	470.077	0.823921	1	88.8614	441.339	66.4113	125.432	1.19353	0.701997	qz
1485	2545	101.242	161.846	11148.4	1.59861	457.186	0.625542	1	86.4246	398.382	100.76	119.171	1.22178	0.669907	qz
1486	2546	134.017	336.239	24216	2.50892	851.375	0.398577	1	160.941	865.349	76.8213	175.637	1.54374	0.419614	qz
1487	2547	254.737	317.958	40838.3	1.24818	1124.09	0.801165	1	212.494	1459.34	79.6956	228.086	1.56954	0.405931	qz
1488	2548	72.8007	141.446	8161.31	1.94293	378.591	0.514687	1	71.5673	291.641	69.5601	101.964	1.18249	0.715169	qz
1489	2549	97.7496	223.007	13460.8	2.28141	533.866	0.438326	1	100.92	481.017	102.441	130.949	1.29838	0.593194	qz
1490	2550	166.106	178.839	20033.8	1.07665	608.274	0.928804	1	114.986	715.899	46.4516	159.752	1.21261	0.680071	qz
1493	2553	148.412	215.786	19698.8	1.45397	603.84	0.687774	1	114.147	703.929	78.3152	158.411	1.21397	0.678557	qz
1494	2559	167.867	255.125	27221.7	1.51981	695.817	0.657977	1	131.534	972.756	80.4147	186.219	1.18999	0.706179	qz
1495	2560	131.137	238.204	20521.3	1.81646	643.709	0.550522	1	121.684	733.32	71.9674	161.684	1.26792	0.622036	qz
1499	2564	111.589	186.652	14682.7	1.67268	505.997	0.597842	1	95.6515	524.681	99.3612	136.763	1.17828	0.720279	qz
1501	2571	124.864	163.175	14076	1.30683	488.51	0.765212	1	92.3459	503.001	87.5845	133.908	1.16182	0.740837	qz
1502	2572	184.853	223.419	28814.8	1.20863	729.003	0.827382	1	137.808	1029.68	105.524	191.59	1.21179	0.680998	qz
1503	2579	168.768	198.5	24369.8	1.17617	654.756	0.850214	1	123.772	870.846	74.4759	176.194	1.18347	0.713976	qz
1504	2580	115.659	317.477	24036.7	2.74494	777.202	0.364306	1	146.919	858.942	93.7401	174.986	1.4145	0.4998	qz
1508	2584	155.903	220.821	23648.1	1.4164	735.97	0.706015	1	139.125	845.055	164.578	173.566	1.35041	0.54836	qz
1509	2585	74.1431	149.715	8232.6	2.01927	384.836	0.49523	1	183.827	997.512	94.8526	102.408	1.19677	0.698192	qz
1511	2587	65.8749	172.75	8642.29	2.62239	410.67	0.381332	1	160.988	816.419	102.095	104.925	1.24648	0.643625	qz
1512	2593	113.19	189.685	14408.7	1.67581	482.695	0.596726	1	91.2468	514.889	65.4516	135.481	1.13466	0.776727	qz
1513	2594	83.263	290.395	15011.3	3.48768	706.373	0.286723	1	133.53	536.422	88.4089	138.285	1.62678	0.377868	qz
1517	2601	279.982	420.381	67391.9	1.50145	1272.66	0.666021	1	240.579	2408.22	99.4788	293.001	1.38329	0.522602	qz
1518	2602	125.483	147.057	12514.5	1.17193	472.899	0.853296	1	89.395	447.2	106.254	126.262	1.1928	0.702854	qz
1519	2603	97.9932	305.108	20260.6	3.11356	746.556	0.321175	1	141.126	724.002	85.9144	160.654	1.47993	0.45658	qz
1521	2607	92.8518	131.083	7796.61	1.41175	396.782	0.708343	1	75.006	278.609	100.008	99.6594	1.26795	0.622003	qz
1523	2609	79.496	99.8483	5911.34	1.25602	301.609	0.796168	1	57.015	211.239	0	86.7777	1.1069	0.81618	qz
1526	2615	77.7072	148.491	7805.34	1.9109	384.012	0.523313	1	72.5921	278.921	94.6202	99.7151	1.22646	0.6648	qz
1527	2616	92.7247	166.64	9930.58	1.79715	442.698	0.556436	1	83.6857	354.865	93.5763	112.474	1.2535	0.636429	qz
1531	2620	125.097	215.172	17826.6	1.72004	673.486	0.581383	1	127.313	637.025	14.5345	150.695	1.42331	0.493628	qz
1532	2624	123.614	185.864	13459.1	1.50359	527.677	0.665076	1	99.75	480.955	77.9508	130.94	1.28341	0.607112	qz
1533	2625	96.1026	187.408	11256.6	1.95008	483.281	0.512799	1	91.3574	402.25	67.426	119.748	1.28529	0.605338	qz
1535	2627	157.762	314.888	30866.9	1.99596	804.042	0.501011	1	151.993	1103.01	105.744	198.295	1.29133	0.599686	qz
1536	2628	103.199	186.94	11307.5	1.81145	497.315	0.552044	1	94.0103	404.069	138.445	120.019	1.31963	0.574241	qz
1539	2635	173.159	340.594	34550.2	1.96694	991.285	0.508404	1	187.388	1234.64	63.3858	209.793	1.5048	0.441614	qz
1540	2636	80.0722	120.034	7526.64	1.49907	328.374	0.66708	1	62.0744	268.961	120.363	97.9187	1.068	0.876707	qz
1542	2638	203.899	303.704	32341.9	1.48949	970.494	0.671373	1	183.458	1155.73	21.3754	202.978	1.5227	0.431291	qz
1543	2639	317.217	776.936	112866	2.44923	2190.55	0.408292	1	414.093	4033.22	98.1351	379.181	1.83983	0.295424	qz
1544	2640	220.346	312.836	41357.6	1.41975	893.383	0.704348	1	168.882	1477.89	60.8551	229.532	1.23955	0.650832	qz
1545	2647	105.092	244.027	16334.9	2.32204	629.033	0.430656	1	118.91	583.722	91.208	144.253	1.38874	0.518513	qz
1548	2650	255.719	634.475	86109.4	2.48114	1713.69	0.403041	1	323.949	3077.08	78.5747	331.2	1.64783	0.368278	qz
1554	2659	82.9892	129.833	7144.6	1.56446	367.845	0.639199	1	69.5359	255.309	67.4188	95.4013	1.22795	0.663189	qz
1556	2661	161.669	297.268	32008.7	1.83874	814.309	0.543851	1	153.934	1143.82	130.677	201.929	1.28428	0.606289	qz
1563	2672	71.5609	191.198	9130.52	2.67182	480.265	0.374277	1	90.7874	326.275	84.9806	107.848	1.4182	0.49719	qz
1565	2674	109.253	130.934	10368.1	1.19845	418.041	0.834413	1	79.0248	370.5	116.565	114.925	1.15844	0.745162	qz
1566	2675	99.9253	188.048	11668.6	1.88189	494.623	0.531381	1	93.5015	416.974	75.2611	121.92	1.29202	0.599047	qz
1569	2678	191.377	304.881	33384.3	1.59309	934.027	0.627711	1	176.565	1192.97	65.7723	206.223	1.44243	0.480632	qz
1571	2683	64.3241	111.611	5904.04	1.73513	292.003	0.576326	1	55.199	210.978	90.082	86.7241	1.0723	0.869692	qz
1572	2684	92.2601	159.488	10263.8	1.72868	449.532	0.578477	1	84.9777	366.772	97.6496	114.345	1.25202	0.637934	qz
1576	2690	74.7033	139.091	5891.88	1.86191	373.108	0.537083	1	70.5309	210.544	35.584	86.6347	1.37156	0.531586	qz
1577	2691	79.7327	154.905	8528.22	1.94281	404.237	0.514719	1	76.4154	304.752	87.188	104.23	1.23513	0.655504	qz
1578	2697	82.3803	134.078	7249.31	1.62755	348.696	0.614422	1	65.9161	259.051	63.9189	96.0978	1.15559	0.748844	qz
1580	2699	126.644	190.401	16698.9	1.50344	565.118	0.665143	1	106.828	596.729	75.3791	145.851	1.23396	0.65675	qz
1581	2700	84.8117	206.546	13624.1	2.43535	563.892	0.410618	1	106.596	486.85	90	131.74	1.36316	0.538152	qz
1587	2714	85.3824	99.6225	5671.23	1.16678	309.149	0.857059	1	58.4403	202.659	59.4928	84.997	1.15834	0.7453	qz
1589	2720	286.276	433.284	66013.7	1.51352	1607.1	0.660712	1	303.799	2358.97	46.9634	289.989	1.76494	0.321025	qz
1590	2721	107.702	170.01	13587.2	1.57852	472.964	0.633505	1	89.4072	485.532	94.6749	131.562	1.1449	0.76289	qz
1592	2725	195.633	302.525	28159.1	1.54639	949.166	0.646667	1	179.427	1006.25	40.7217	189.398	1.59602	0.392576	qz
1593	2726	179.923	386.735	36445.9	2.14945	1057.63	0.465235	1	199.93	1302.38	67.5095	215.471	1.5632	0.409232	qz
1594	2727	118.383	284.144	21341.3	2.4002	745.888	0.416631	1	141	762.622	88.6254	164.883	1.44068	0.481796	qz
1595	2728	73.8177	189.443	8419.44	2.56637	478.241	0.389656	1	90.4048	300.865	102.834	103.564	1.47065	0.462358	qz
1596	2729	126.242	214.682	15973.9	1.70057	616.926	0.588039	1	116.621	570.822	10.8396	142.65	1.37731	0.527151	qz
1598	2731	133.143	285.014	23162.8	2.14067	750.327	0.467144	1	141.839	827.712	103.535	171.775	1.39111	0.516748	qz
1599	2732	85.0699	128.475	7258.84	1.51023	338.824	0.662149	1	64.05	259.392	156.63	96.161	1.12214	0.79416	qz
1604	2744	80.3261	182.259	10108.7	2.26899	451.105	0.440724	1	85.2751	361.231	95.3224	113.478	1.266	0.623922	qz
1606	2746	104.05	200.477	13140.2	1.92674	506.65	0.51901	1	95.775	469.561	109.267	129.38	1.24713	0.64295	qz
1608	2755	97.5189	192.633	12172.2	1.97534	507.651	0.506242	1	95.9643	434.969	60.3136	124.523	1.29833	0.593238	qz
1610	2757	117.928	203.207	17146.1	1.72314	540.034	0.580337	1	102.086	612.71	70.9651	147.791	1.16371	0.738437	qz
1613	2764	114.781	234.078	19398.7	2.03934	639.187	0.490356	1	120.829	693.203	96.183	157.199	1.29493	0.596357	qz
1615	2766	98.3745	213.759	14433.8	2.17292	562.238	0.460211	1	106.283	515.786	77.2756	135.599	1.32049	0.573495	qz
1618	2771	97.9041	215.02	13692.3	2.19623	533.611	0.455327	1	100.872	489.287	93.4307	132.07	1.28674	0.60397	qz
1625	2781	88.0153	125.589	7902.12	1.4269	373.281	0.700821	1	70.5636	282.379	115.076	100.331	1.18487	0.712296	qz
1626	2782	79.7638	157.789	9298.07	1.9782	404.661	0.50551	1	76.4954	332.263	89.9477	108.833	1.18413	0.713182	qz
1630	2789	113.465	240.611	17024.4	2.12058	606.984	0.471569	1	114.742	608.361	112.746	147.266	1.31264	0.580375	qz
1631	2790	89.932	143.088	8162.61	1.59107	397.85	0.628509	1	75.208	291.687	90.011	101.972	1.24254	0.647708	qz
1640	2801	140.891	297.025	26148.8	2.10819	775.516	0.474341	1	146.6	934.415	108.435	182.512	1.35323	0.546084	qz
1643	2806	127.885	203.807	14241.9	1.59367	604.904	0.627483	1	114.349	508.927	122.33	134.694	1.43024	0.488859	qz
1649	2812	143.49	172.342	17831.9	1.20108	587.201	0.832587	1	111.002	637.215	170.495	150.718	1.24078	0.649552	qz
1650	2813	148.083	187.021	18357.6	1.26295	605.579	0.791798	1	114.476	656	21.8014	152.923	1.26116	0.628727	qz
1651	2823	112.282	140.78	10945.5	1.2538	421.464	0.797574	1	79.6719	391.132	140.589	118.082	1.13671	0.773932	qz
1652	2824	170.942	360.227	36639.3	2.10731	918.527	0.474539	1	173.635	1309.29	60.2604	216.042	1.35402	0.545447	qz
1653	2825	138.721	248.581	19968.4	1.79196	657.968	0.558049	1	124.38	713.563	103.023	159.491	1.31383	0.579327	qz
1658	2833	89.8707	121.959	7228.32	1.35705	362.314	0.736892	1	68.4903	258.301	76.2667	95.9586	1.20246	0.691604	qz
1659	2834	186.704	284.03	32367.4	1.52129	921.145	0.657337	1	174.129	1156.64	59.1155	203.058	1.4447	0.479117	qz
1661	2836	89.9709	137.519	8543.49	1.52849	405.509	0.654242	1	76.6558	305.298	89.8889	104.324	1.23791	0.652565	qz
1663	2845	107.157	323.76	26333.6	3.02136	844.1	0.330976	1	159.565	941.019	78.4663	183.156	1.46772	0.464207	qz
1665	2847	168.474	213.279	20814.6	1.26595	643.138	0.789923	1	121.576	743.802	135.061	162.836	1.25784	0.632047	qz
1666	2848	129.624	303.192	30187.2	2.33901	753.742	0.427531	1	142.484	1078.73	92.8846	196.1	1.2241	0.66737	qz
1670	2852	109.954	207.387	16116.5	1.88612	560.896	0.530189	1	106.029	575.915	82.8784	143.285	1.24667	0.643421	qz
1671	2858	76.5614	127.604	6403.31	1.66669	330.233	0.59999	1	62.426	228.819	111.038	90.3165	1.16446	0.737483	qz
1672	2859	74.2808	179.888	9219.1	2.42173	456.639	0.412928	1	86.3212	329.44	90.076	108.37	1.34194	0.555305	qz
1674	2861	120.489	183.654	15035.8	1.52424	559.378	0.656064	1	105.743	537.296	65.6332	138.397	1.28721	0.603536	qz
1679	2873	266.024	466.079	45573.4	1.75202	1482.28	0.570769	1	280.205	1628.55	120.834	240.947	1.95921	0.260518	qz
1680	2874	118.639	299.538	19162.7	2.52479	722.714	0.396073	1	136.619	684.77	92.7735	156.24	1.47314	0.460801	qz
1685	2886	157.161	196.676	19100.5	1.25143	602.369	0.799084	1	113.869	682.548	36.3844	155.987	1.22983	0.661163	qz
1686	2893	267.538	322.447	57312.6	1.20524	1188.98	0.829711	1	224.76	2048.04	93.3168	270.203	1.40137	0.509203	qz
1688	2895	266.216	427.821	62051.7	1.60705	1327.2	0.62226	1	250.889	2217.39	28.9451	281.152	1.50337	0.442453	qz
1689	2900	139.604	248.452	26583.7	1.77968	708.561	0.561897	1	133.943	949.959	70.9456	184.023	1.22624	0.665046	qz
1691	2902	120.285	284.248	22741.5	2.36312	746.99	0.423169	1	141.208	812.658	78.1113	170.206	1.39769	0.511893	qz
1694	2907	106.858	146.262	9734.64	1.36875	426.215	0.730592	1	80.57	347.863	53.1301	111.359	1.21892	0.673056	qz
1695	2908	128.619	233.449	20413.8	1.81504	630.065	0.550952	1	119.105	729.48	78.7533	161.26	1.24431	0.645867	qz
1696	2909	212.214	280.169	42171.5	1.32022	944.743	0.75745	1	178.59	1506.98	145.389	231.779	1.2981	0.593447	qz
1698	2911	86.9446	181.514	10698.9	2.0877	448.328	0.478997	1	84.7501	382.32	144.782	116.744	1.22302	0.668554	qz
1699	2912	126.728	164.676	13679.3	1.29945	476.804	0.769559	1	90.1331	488.823	114.775	132.007	1.15031	0.75574	qz
1700	2913	128.57	207.648	17363	1.61506	575.252	0.619173	1	108.743	620.461	72.6449	148.723	1.23183	0.65902	qz
1702	2915	82.3151	122.606	6544.38	1.48948	351.104	0.671376	1	66.3713	233.861	97.1284	91.306	1.22464	0.666786	qz
1703	2920	67.6742	209.629	11054.1	3.09762	485.236	0.322829	1	91.7271	395.013	80.4746	118.666	1.30226	0.589666	qz
1704	2921	101.293	216.43	15437.5	2.13668	562.847	0.468016	1	106.398	551.654	81.8699	140.234	1.27822	0.61205	qz
1706	2923	108.533	227.351	17429.7	2.09475	594.954	0.477384	1	112.468	622.842	59.7024	149.008	1.27158	0.618461	qz
1707	2925	79.3798	163.27	9235.68	2.05682	401.145	0.486189	1	75.8307	330.033	63.8854	108.467	1.1778	0.720869	qz
1708	2926	228.702	501.218	54502.8	2.19157	1439.3	0.456293	1	272.08	1947.63	95.8466	263.496	1.73959	0.330448	qz
1711	2936	134.426	211.658	20627.3	1.57453	595.214	0.635109	1	112.517	737.109	90.0574	162.101	1.16938	0.731284	qz
1713	2942	175.624	425.791	47730.4	2.42445	1154.81	0.412465	1	218.301	1705.63	72.5528	246.583	1.49149	0.449532	qz
1714	2943	115.457	165.553	12814.9	1.4339	486.644	0.6974	1	91.9933	457.935	46.1638	127.768	1.213	0.679643	qz
1715	2944	83.187	183.572	10770.3	2.20674	462.089	0.453157	1	87.3515	384.872	81.4735	117.133	1.25637	0.633527	qz
1717	2946	101.944	150.37	10795.1	1.47502	418.513	0.677958	1	79.114	385.759	140.658	117.268	1.13658	0.774103	qz
1718	2947	91.1927	120.079	8704.96	1.31677	372.8	0.759437	1	70.4726	311.068	77.1008	105.305	1.12745	0.786692	qz
1723	2952	110.101	178.351	12868.1	1.61989	492.807	0.617327	1	93.1582	459.837	162.138	128.033	1.22581	0.665506	qz
1724	2960	142.221	208.828	17505.7	1.46833	606.839	0.681044	1	114.714	625.558	101.89	149.333	1.29416	0.597064	qz
1725	2961	107.237	278.168	18701.9	2.59394	667.597	0.385514	1	126.2	668.304	100.62	154.35	1.37745	0.527044	qz
1726	2962	88.8567	137.054	6726.96	1.54242	381.512	0.648331	1	72.1195	240.385	131.967	92.5709	1.31252	0.580486	qz
1728	2971	311.184	510.925	93670	1.64187	1625.1	0.60906	1	307.202	3347.26	48.5035	345.434	1.49825	0.445482	qz
1730	2973	87.9016	191.089	10897.9	2.1739	467.692	0.460003	1	88.4107	389.434	138.978	117.825	1.26413	0.625768	qz
1731	2978	80.8776	135.074	7982.42	1.6701	395.965	0.598766	1	74.8516	285.248	96.7855	100.84	1.25053	0.639457	qz
1733	2980	103.213	147.847	10779.4	1.43245	405.422	0.698106	1	76.6392	385.199	126.506	117.183	1.10183	0.823706	qz
1738	2989	240.27	607.999	79947.9	2.53049	1660.67	0.395181	1	313.926	2856.9	78.7361	319.131	1.65724	0.364108	qz
1741	2994	181.848	291.94	31263.1	1.6054	750.549	0.622896	1	141.881	1117.17	44.8689	199.564	1.19775	0.69705	qz
1742	2995	89.9627	180.539	11784.6	2.00682	461.784	0.4983	1	87.2938	421.117	90.0889	122.524	1.20029	0.694105	qz
1748	3010	269.008	471.404	73264.2	1.75238	1479.5	0.570652	1	279.679	2618.07	90.1962	305.5	1.54232	0.420388	qz
1749	3011	456.611	681.811	136231	1.4932	2831.02	0.669702	1	535.165	4868.15	153.422	416.584	2.16427	0.21349	qz
1750	3012	86.7756	207.336	10743.2	2.38934	503.175	0.418526	1	95.1181	383.904	86.4197	116.985	1.3698	0.532948	qz
1752	3021	116.689	173.516	14371	1.48699	531.735	0.672499	1	100.517	513.542	115.621	135.303	1.25158	0.63839	qz
1754	3024	111.191	153.363	10764.3	1.37928	461.494	0.725016	1	87.239	384.659	26.5651	117.101	1.2551	0.63481	qz
1758	3028	145.224	195.558	17051.8	1.3466	606.273	0.742613	1	114.607	609.34	38.249	147.384	1.31005	0.582672	qz
1759	3032	95.2484	439.542	24132.5	4.6147	966.851	0.216699	1	182.77	862.365	89.9616	175.334	1.75616	0.324245	qz
1761	3034	97.1293	140.388	9221.78	1.44537	412.64	0.691865	1	78.0037	329.536	41.1217	108.386	1.21246	0.68024	qz
1765	3041	129.318	221.397	16771.8	1.71204	600.301	0.584098	1	113.478	599.334	94.5468	146.169	1.30793	0.584564	qz
1766	3042	171.18	217.497	20776	1.27057	691.692	0.787046	1	130.755	742.423	168.69	162.685	1.35406	0.545415	qz
1772	3057	77.2303	195.853	10720.6	2.53595	471.796	0.394329	1	89.1864	383.096	82.2103	116.862	1.28573	0.604923	qz
1773	3058	89.1803	159.58	9704.83	1.78941	422.224	0.558843	1	79.8156	346.798	107.222	111.188	1.20936	0.68374	qz
1774	3059	140.044	346.95	34646.8	2.47743	849.959	0.403645	1	160.673	1238.09	104.628	210.086	1.28846	0.602361	qz
1778	3063	101.236	193.679	12675.7	1.91315	493.233	0.522697	1	93.2387	452.961	56.3099	127.072	1.23615	0.654422	qz
1779	3068	115.111	167.167	13538.4	1.45222	485.362	0.688601	1	91.7508	483.791	101.459	131.326	1.17703	0.721817	qz
1780	3069	126.48	200.353	17451.4	1.58406	648.118	0.631288	1	122.518	623.618	70.9065	149.101	1.38434	0.521809	qz
1781	3070	85.8387	134.032	7765.2	1.56144	377.697	0.640435	1	71.3983	277.486	44.0634	99.4584	1.20941	0.683684	qz
1784	3078	359.898	692.744	120020	1.92483	2109.68	0.519525	1	398.806	4288.85	79.4207	391.013	1.71829	0.338694	qz
1787	3081	125.342	232.137	22525.4	1.85202	633.661	0.53995	1	119.785	804.935	103.661	169.395	1.19131	0.704608	qz
1789	3083	51.7688	178.481	6580.37	3.44766	392.413	0.290052	1	74.1801	235.147	82.8471	91.5567	1.36497	0.536728	qz
1795	3093	61.4012	132.43	5707.12	2.1568	347.916	0.46365	1	65.7686	203.941	111.835	85.2655	1.29948	0.592186	qz
1804	3106	318.178	513.992	90793.4	1.61542	1773.23	0.619033	1	335.204	3244.46	91.6719	340.089	1.66052	0.362672	qz
1807	3113	214.258	456.745	53586	2.13176	1216.46	0.469096	1	229.955	1914.87	73.9807	261.271	1.48279	0.454824	qz
1810	3118	88.4904	222.594	13438.3	2.51546	540.015	0.397541	1	102.082	480.213	82.5686	130.839	1.31443	0.578792	qz
1812	3120	113.836	291.646	22464.7	2.56199	699.146	0.390321	1	132.164	802.767	104.518	169.167	1.3162	0.577237	qz
1813	3125	70.5311	206.112	10284.1	2.92229	498.575	0.342197	1	94.2486	367.497	82.0433	114.458	1.38724	0.51963	qz
1815	3127	106.354	143.669	10152.7	1.35085	460.274	0.740272	1	87.0083	362.802	138.013	113.725	1.28893	0.60192	qz
1816	3128	108.767	135.519	11385.7	1.24595	447.466	0.802598	1	84.5871	406.862	62.5417	120.433	1.18328	0.714213	qz
1820	3139	411.763	748.118	155364	1.81687	2413.72	0.550398	1	456.28	5551.86	100.405	444.877	1.72789	0.334939	qz
1821	3142	139.746	272.014	23808.8	1.94649	750.414	0.513745	1	141.855	850.796	83.425	174.154	1.37226	0.531037	qz
1825	3146	122.661	214.704	18171.2	1.75039	588.392	0.571302	1	111.227	649.339	39.8483	152.145	1.23163	0.659233	qz
1830	3151	190.156	378.98	29873.3	1.993	1050.93	0.501757	1	198.663	1067.51	23.666	195.077	1.71568	0.339724	qz
1834	3168	149.753	291.513	22064.5	1.94663	822.255	0.513708	1	155.436	788.464	114.228	167.653	1.56194	0.409893	qz
1835	3169	172.336	335.835	33337.8	1.94873	850.072	0.513156	1	160.694	1191.31	74.4706	206.079	1.31369	0.579449	qz
1836	3170	78.4647	236.956	11292.4	3.0199	557.346	0.331136	1	105.358	403.529	121.919	119.938	1.47992	0.45659	qz
1839	3173	78.5296	103.601	5915.8	1.31927	296.959	0.757997	1	56.1359	211.398	90.0532	86.8104	1.08942	0.842577	qz
1844	3185	69.7501	140.524	6062.67	2.01467	355.41	0.496358	1	67.1852	216.647	87.202	87.8814	1.28796	0.602831	qz
1845	3186	143.107	334.459	23063.7	2.33712	934.379	0.427877	1	176.631	824.171	66.7617	171.407	1.73606	0.331797	qz
1848	3194	149.118	310.301	29603.8	2.08091	801.087	0.480558	1	151.434	1057.88	100.208	194.195	1.31374	0.5794	qz
1850	3199	82.4968	145.56	7482.93	1.76443	384.02	0.566754	1	72.5935	267.399	32.2756	97.634	1.25263	0.637315	qz
1851	3206	179.81	271.277	23960.9	1.50868	810.141	0.662831	1	153.146	856.231	12.8312	174.709	1.47678	0.458534	qz
1853	3208	81.6159	273.798	13372.9	3.35471	631.71	0.298088	1	119.416	477.875	101.31	130.52	1.54138	0.420901	qz
1854	3209	133.814	280.057	23320.5	2.09288	709.536	0.477809	1	134.128	833.347	81.6099	172.359	1.31102	0.581806	qz
1857	3215	138.263	214.549	16004.5	1.55175	600.937	0.644433	1	113.599	571.913	147.265	142.786	1.34034	0.556637	qz
1862	3226	170.242	206.272	21763.6	1.21164	682.129	0.825325	1	128.947	777.714	68.4776	166.506	1.30469	0.587472	qz
1871	3247	98.9269	132.421	8721.88	1.33858	380.878	0.747063	1	71.9996	311.673	150.085	105.407	1.15076	0.755141	qz
1878	3259	62.4183	131.958	6369.87	2.1141	329.135	0.473016	1	62.2183	227.625	77.5459	90.0804	1.16363	0.738538	qz
1880	3261	186.836	294.822	31926	1.57797	863.275	0.633725	1	163.19	1140.86	58.3665	201.668	1.36327	0.538066	qz
1888	3283	155.293	411.646	33095.6	2.65077	1030.75	0.377248	1	194.849	1182.66	52.1755	205.329	1.59873	0.391246	qz
1889	3284	140.311	271.267	24561.4	1.93332	748.048	0.517245	1	141.408	877.69	113.199	176.885	1.34682	0.551294	qz
1892	3287	101.455	139.724	9723.52	1.3772	411.439	0.726111	1	77.7767	347.466	115.071	111.295	1.17733	0.721444	qz
1895	3293	148.803	245.016	20151.4	1.64658	644.239	0.60732	1	121.784	720.102	75.8654	160.22	1.28056	0.609819	qz
1897	3295	120.319	157.203	12960	1.30655	459.647	0.765373	1	86.8898	463.119	28.6123	128.489	1.13927	0.77045	qz
1898	3296	104.64	142.038	9218.46	1.3574	404.466	0.736703	1	76.4585	329.418	45.3873	108.366	1.18866	0.707758	qz
1901	3304	80.6384	140.557	6355.05	1.74305	357.712	0.573706	1	67.6205	227.095	71.456	89.9756	1.26613	0.623794	qz
1908	3315	144.293	182.852	16891.7	1.26723	537.365	0.789123	1	101.581	603.617	6.33509	146.69	1.16664	0.734723	qz
1913	3320	130.85	204.466	16654	1.5626	594.124	0.63996	1	112.311	595.124	106.452	145.655	1.29904	0.592589	qz
1924	3339	73.0876	110.947	6030.58	1.518	337.186	0.658762	1	63.7402	215.5	173.94	87.6485	1.22517	0.666208	qz
1929	3349	178.001	337.549	32443.6	1.89633	992.716	0.527333	1	187.659	1159.36	77.3474	203.296	1.55513	0.413494	qz
1930	3350	104.27	152.396	10729.9	1.46155	416.596	0.684204	1	78.7515	383.427	140.194	116.913	1.13481	0.776524	qz
1931	3351	138.972	203.526	15468.9	1.46451	576.353	0.682823	1	108.951	552.774	53.6192	140.377	1.30757	0.584887	qz
1932	3352	92.4409	138.301	9133.23	1.4961	409.073	0.668404	1	77.3295	326.372	110.702	107.864	1.2078	0.685507	qz
1936	3360	127.775	159.094	15415.3	1.24511	482.672	0.803142	1	91.2423	550.858	21.7125	140.133	1.09694	0.831069	qz
1943	3372	63.9773	132.836	7260.88	2.0763	353.042	0.481626	1	66.7377	259.465	90.152	96.1745	1.16906	0.731687	qz
1947	3381	115.316	186.111	15367.3	1.61392	499.859	0.619609	1	94.4912	549.143	36.2154	139.915	1.13777	0.772489	qz
1949	3383	86.1854	143.644	8188.17	1.66668	385.826	0.599994	1	72.935	292.601	86.2527	102.131	1.2031	0.690865	qz
1950	3384	214.445	607.113	86858.3	2.83109	1504.72	0.353221	1	284.447	3103.84	61.6041	332.637	1.44064	0.481823	qz
1953	3387	361.441	853.376	151978	2.36104	2503.26	0.423543	1	473.205	5430.85	88.5436	440.002	1.81184	0.30462	qz
1956	3391	103.73	155.987	10221.4	1.50378	468.557	0.664992	1	88.5741	365.259	60.7326	114.109	1.30771	0.584759	qz
1957	3392	106.74	155.318	9317.22	1.4551	436.603	0.687236	1	82.5337	332.947	121.608	108.945	1.27629	0.613906	qz
1958	3393	83.7378	126.569	6312.7	1.51149	348.316	0.661598	1	65.8443	225.582	91.8149	89.6753	1.23701	0.653517	qz
1960	3402	160.393	252.079	26225.1	1.57164	747.534	0.636279	1	141.311	937.144	23.0487	182.778	1.3025	0.589448	qz
1966	3413	119.203	262.456	23903.3	2.20175	691.184	0.454184	1	130.659	854.173	69.2896	174.499	1.26145	0.628433	qz
1967	3414	126.026	292.405	19111.5	2.32019	719.468	0.430999	1	136.005	682.942	88.8688	156.032	1.46848	0.463727	qz
1968	3415	94.1652	230.491	13480.3	2.44773	570.404	0.408542	1	107.827	481.712	81.867	131.043	1.38624	0.520384	qz
1985	3449	72.3571	105.978	5649.96	1.46465	283.094	0.682758	1	53.515	201.899	105.517	84.8375	1.06271	0.885469	qz
1990	3459	229.595	559.446	87885.8	2.43666	1399.03	0.410398	1	264.467	3140.56	106.028	334.599	1.3316	0.563968	qz
1993	3463	135.524	255.043	22095.7	1.88191	700.856	0.531375	1	132.487	789.58	53.0369	167.772	1.33039	0.564988	qz
2003	3484	157.198	221.35	19750	1.40809	688.514	0.710182	1	130.154	705.757	103.496	158.616	1.3824	0.523275	qz
2007	3493	141.783	172.812	14940	1.21885	528.185	0.820447	1	99.846	533.875	116.37	137.956	1.21932	0.672617	qz
2015	3509	158.874	350.285	27823.6	2.2048	950.899	0.453555	1	179.754	994.266	75.6507	188.266	1.60854	0.386487	qz
2016	3510	137.943	280.406	24130.7	2.03277	774.046	0.49194	1	146.323	862.301	62.6095	175.328	1.40601	0.505855	qz
2020	3517	133.185	200.469	16893.5	1.5052	595.124	0.664365	1	112.5	603.68	47.1211	146.698	1.29197	0.599091	qz
2022	3519	99.5594	286.257	18202.5	2.87524	679.637	0.347797	1	128.476	650.459	63.4349	152.276	1.4214	0.494956	qz
2028	3529	99.1199	168.699	11180.1	1.70197	455.329	0.587554	1	86.0736	399.518	84.0037	119.341	1.21509	0.677308	qz
2029	3530	214.917	368.891	39985.5	1.71643	1047.88	0.582604	1	198.087	1428.86	87.6315	225.692	1.47865	0.457369	qz
2032	3539	119.199	196.005	14563.6	1.64436	526.198	0.608141	1	99.4703	520.423	93.6843	136.207	1.23033	0.660632	qz
2033	3540	191.534	295.405	28742.3	1.54231	927.743	0.648378	1	175.377	1027.09	102.095	191.349	1.54409	0.419426	qz
2036	3543	132.611	333.406	23648.6	2.51416	845.806	0.397746	1	159.888	845.074	92.6099	173.567	1.55193	0.415197	qz
2037	3544	166.013	344.135	36717.5	2.07294	899.273	0.482408	1	169.995	1312.08	111.801	216.273	1.32422	0.570268	qz
2038	3545	91.9333	170.758	10685.3	1.85741	444.298	0.538384	1	83.9882	381.835	73.4521	116.67	1.21279	0.679875	qz
2041	3551	124.8	228.642	17828.9	1.83206	617.714	0.545832	1	116.77	637.11	159.527	150.705	1.30536	0.586867	qz
2046	3561	85.3493	184.96	8973.83	2.1671	476.4	0.461446	1	90.0567	320.676	40.9225	106.919	1.41902	0.49662	qz
2047	3562	106.715	167.14	12921.8	1.56622	485.978	0.638479	1	91.8673	461.754	101.083	128.3	1.20632	0.687192	qz
2051	3573	139.19	355.225	30341.2	2.55209	943.848	0.391836	1	178.421	1084.23	100.379	196.599	1.52894	0.427777	qz
2052	3574	106.747	380.401	23662	3.56359	891.29	0.280616	1	168.486	845.552	99.8347	173.616	1.63493	0.374113	qz
2059	3584	180.672	254.401	22332.4	1.40808	831.225	0.710187	1	157.131	798.041	78.4621	168.668	1.56948	0.405965	qz
2061	3586	173.429	296.624	37482.2	1.71035	890.008	0.584676	1	168.243	1339.41	89.5183	218.513	1.29714	0.594328	qz
2068	3599	122.05	158.799	14015.3	1.3011	522.376	0.768582	1	98.7478	500.831	90.0155	133.618	1.24505	0.645099	qz
2086	3630	135.05	213.608	20469.7	1.5817	592.362	0.632232	1	111.978	731.475	13.2202	161.481	1.16825	0.7327	qz
2087	3631	82.157	277.321	13582.6	3.3755	644.73	0.296253	1	121.877	485.367	100.053	131.539	1.56096	0.410408	qz
2089	3633	115.144	149.057	10707.3	1.29453	443.114	0.772483	1	83.7645	382.619	50.1944	116.79	1.20832	0.684915	qz
2090	3642	139.783	357.867	26504.5	2.56017	884.889	0.390599	1	167.276	947.128	102.766	183.749	1.53368	0.42514	qz
2091	3643	136.793	233.952	21198.7	1.71027	653.184	0.584704	1	123.475	757.525	138.608	164.331	1.26586	0.624061	qz
2095	3653	61.6349	167.908	7112.05	2.72424	406.249	0.367075	1	76.7957	254.146	74.0546	95.1837	1.35925	0.541252	qz
2096	3654	134.25	180.046	18200.2	1.34112	544.383	0.745645	1	102.908	650.375	70.1721	152.266	1.1386	0.771357	qz
2099	3660	105.795	260.599	19729.7	2.46323	676.176	0.405971	1	127.821	705.034	92.5448	158.535	1.35833	0.541991	qz
2103	3672	106.078	226.09	16606.4	2.13136	629.554	0.469183	1	119.008	593.423	99.4623	145.446	1.37848	0.52626	qz
2104	3673	86.9738	138.354	8429.55	1.59075	392.262	0.628634	1	74.1516	301.226	60.0382	103.626	1.20553	0.688084	qz
2108	3680	105.351	164.244	13024.8	1.55901	510.148	0.641432	1	96.4362	465.435	105.223	128.81	1.26129	0.628591	qz
2111	3689	82.2678	128.509	8111.06	1.56208	359.461	0.640171	1	67.9511	289.845	75.4029	101.649	1.12621	0.788429	qz
2117	3701	73.03	117.633	5637.9	1.61075	331.097	0.620829	1	62.5892	201.468	115.538	84.7469	1.24423	0.645947	qz
2118	3708	85.59	247.999	14195	2.89752	600.385	0.345123	1	113.494	507.252	112.166	134.472	1.42189	0.494613	qz
2119	3709	96.7091	155.136	9346.37	1.60415	406.309	0.623383	1	76.807	333.989	120.964	109.116	1.18588	0.711082	qz
2121	3711	114.702	309.055	24529.5	2.69442	785.586	0.371137	1	148.504	876.552	106.618	176.77	1.41532	0.499219	qz
2122	3712	157.561	315.337	31783.9	2.00136	840.896	0.49966	1	158.96	1135.78	122.919	201.219	1.3309	0.564563	qz
2129	3725	69.0123	169.767	8182.5	2.45995	401.032	0.406513	1	75.8094	292.398	90.714	102.096	1.25095	0.639025	qz
2130	3726	78.4469	132.453	7151.9	1.68844	360.796	0.592262	1	68.2035	255.57	155.303	95.45	1.20381	0.69006	qz
2135	3733	100.422	132.136	8669.89	1.31581	388.463	0.759991	1	73.4335	309.815	171.502	105.093	1.17719	0.721611	qz
2136	3734	92.2283	192.378	11757.1	2.08589	477.268	0.479411	1	90.2209	420.134	127.569	122.381	1.24199	0.648281	qz
2138	3736	69.9133	184.514	9381.78	2.63918	447.195	0.378906	1	84.5358	335.254	100.175	109.322	1.30274	0.589226	qz
2142	3740	172.518	289.459	33916.1	1.67784	878.8	0.596004	1	166.125	1211.98	76.6075	207.859	1.34646	0.551588	qz
2143	3741	183.033	409.877	40458.3	2.23936	1103.48	0.446557	1	208.598	1445.76	66.1956	227.023	1.54798	0.417319	qz
2144	3742	96.7238	133.836	9550.99	1.3837	376.494	0.722702	1	71.1709	341.301	121.711	110.304	1.08702	0.846295	qz
2147	3747	242.509	455.268	60547.2	1.87733	1365.7	0.532672	1	258.166	2163.63	85.6327	277.723	1.56607	0.407733	qz
2151	3753	77.0628	118.22	6597.43	1.53407	347.352	0.65186	1	65.6621	235.756	137.99	91.6754	1.20667	0.68679	qz
2153	3757	119.279	237.267	14090.9	1.98918	662.77	0.502719	1	125.287	503.531	120.867	133.978	1.57543	0.402904	qz
2154	3758	131.78	177.589	13959.5	1.34762	554.551	0.742051	1	104.83	498.836	48.298	133.352	1.32438	0.570132	qz
2163	3770	238.819	493.623	61607.3	2.06693	1396.62	0.483809	1	264.011	2201.51	104.467	280.144	1.5877	0.396703	qz
2169	3782	130.911	219.849	20836.4	1.67937	682.698	0.59546	1	129.054	744.578	87.0727	162.921	1.33451	0.561505	qz
2170	3788	80.8749	167.205	8074.35	2.06745	427.722	0.483688	1	80.8548	288.534	19.2725	101.419	1.34311	0.554338	qz
2172	3790	130.633	269.642	23695.8	2.06411	731.102	0.484469	1	138.204	846.758	89.9762	173.74	1.34013	0.556807	qz
2173	3791	95.0083	119.152	8059.89	1.25412	369.117	0.797373	1	69.7763	288.017	141.34	101.328	1.16012	0.743004	qz
2175	3797	95.7693	198.889	13520	2.07676	517.741	0.48152	1	97.8716	483.13	72.3499	131.236	1.25641	0.63349	qz
2179	3806	108.156	187.952	13121.5	1.73779	498.717	0.575444	1	94.2755	468.892	86.9872	129.288	1.22848	0.662621	qz
2180	3807	195.049	321.055	38696.5	1.64602	876.266	0.607524	1	165.646	1382.8	62.077	222.025	1.25691	0.63298	qz
2181	3808	98.6718	130.451	8310.34	1.32207	390.729	0.756392	1	73.8619	296.967	99.4623	102.89	1.20941	0.683685	qz
2182	3809	88.286	165.025	9445.93	1.86921	499.061	0.534984	1	94.3404	337.546	21.6674	109.695	1.44889	0.476352	qz
2183	3810	106.145	167.715	12969.6	1.58005	484.103	0.632892	1	91.5128	463.463	63.9354	128.537	1.19944	0.695091	qz
2190	3821	74.2421	130.767	6338.15	1.76136	336.613	0.567744	1	63.632	226.491	62.096	89.8559	1.19304	0.702571	qz
2191	3822	110.979	197.295	14498.8	1.77776	514.499	0.562505	1	97.2588	518.11	12.9256	135.904	1.20566	0.687945	qz
2195	3826	129.553	242.189	18871.3	1.86943	689.881	0.534924	1	130.412	674.359	93.914	155.048	1.41703	0.498016	qz
2196	3827	80.7297	128.518	7444.07	1.59195	353.667	0.628159	1	66.8557	266.011	127.875	97.3801	1.15663	0.747501	qz
2199	3831	184.184	382.368	44868.9	2.07601	1003.32	0.481692	1	189.664	1603.37	102.529	239.077	1.33652	0.559824	qz
2200	3832	133.393	163.605	15732.3	1.22648	488.539	0.815339	1	92.3515	562.186	75.3841	141.567	1.09903	0.827908	qz
2202	3834	110.504	127.708	9717.61	1.15569	409.795	0.86528	1	77.4659	347.255	47.4791	111.262	1.17298	0.726803	qz
2203	3841	153.456	428.604	36122.6	2.79301	1060.42	0.358037	1	200.458	1290.83	90.0207	214.514	1.57432	0.40347	qz
2205	3843	149.93	218.881	21989.5	1.45989	612.448	0.684984	1	115.775	785.785	165.363	167.368	1.16538	0.73632	qz
2206	3844	134.423	194.934	15512.5	1.45015	556.702	0.689582	1	105.237	554.334	92.4896	140.574	1.26121	0.628675	qz
2209	3847	97.404	134.308	7754.72	1.37888	380.223	0.725227	1	71.8757	277.112	63.8673	99.3913	1.21832	0.673721	qz
2213	3851	54.879	154.148	6369.55	2.80887	374.832	0.356015	1	70.8567	227.613	92.916	90.0782	1.32522	0.569411	qz
2214	3852	97.0918	184.684	11327	1.90215	471.937	0.52572	1	89.2131	404.767	72.5219	120.122	1.25121	0.63876	qz
2215	3855	101.031	123.424	8721.47	1.22164	358.641	0.818572	1	67.7961	311.658	134.951	105.405	1.0836	0.851645	qz
2217	3860	185.122	392.225	44710.4	2.11874	1025.05	0.471979	1	193.772	1597.71	75.5422	238.655	1.36787	0.53445	qz
2228	3874	178.917	200.438	23356.9	1.12029	639.775	0.892628	1	120.94	834.648	120.749	172.493	1.1812	0.716721	qz
2229	3881	86.9706	144.96	8273.26	1.66677	400.78	0.599964	1	75.7619	295.641	102.573	102.661	1.24329	0.646924	qz
2231	3887	146.748	347.711	31317.4	2.36944	909.808	0.422041	1	171.986	1119.12	75.9136	199.737	1.45065	0.4752	qz
2232	3888	88.6789	132.802	8260.35	1.49756	365.247	0.667752	1	69.0449	295.18	176.49	102.58	1.13395	0.777703	qz
2235	3891	318.996	407.452	84187	1.27729	1443.64	0.782906	1	272.9	3008.39	121.701	327.482	1.40392	0.507362	qz
2241	3901	140.683	262.606	22884.5	1.86666	693.429	0.535717	1	131.083	817.767	98.3257	170.74	1.29341	0.597759	qz
2243	3910	133.873	231.205	15144.6	1.72705	624.672	0.579022	1	118.085	541.187	124.38	138.897	1.43228	0.487466	qz
2244	3911	142.034	268.768	26296	1.89228	726.012	0.528463	1	137.242	939.677	88.6361	183.025	1.26329	0.626602	qz
2245	3912	448.642	763.592	183254	1.70201	2977.23	0.587542	1	562.803	6548.49	112.876	483.161	1.96242	0.259668	qz
2246	3913	115.693	261.724	19797	2.26223	708.63	0.442042	1	133.956	707.438	99.8485	158.805	1.4211	0.495166	qz
2248	3915	95.3596	119.825	8146.95	1.25656	375.991	0.795824	1	71.0758	291.128	90	101.874	1.1754	0.723819	qz
2254	3921	123.807	235.303	16936	1.90056	621.827	0.526162	1	117.548	605.199	93.7147	146.883	1.34825	0.550123	qz
2256	3927	99.0697	241.909	16319.5	2.44181	587.905	0.409532	1	111.135	583.17	69.9812	144.184	1.29855	0.593037	qz
2259	3930	153.805	158.803	17313.2	1.03249	632.167	0.96853	1	119.502	618.681	136.736	148.51	1.35565	0.544132	qz
2262	3933	106.016	137.833	10369.6	1.30012	388.582	0.76916	1	73.4559	370.553	49.3987	114.933	1.07673	0.862555	qz
2269	3948	123.397	241.058	19418.5	1.95351	730.603	0.511898	1	138.11	693.913	94.5919	157.28	1.47938	0.456923	qz
2272	3960	85.9178	164.772	10794	1.91779	428.39	0.521435	1	80.981	385.717	104.13	117.261	1.16347	0.738741	qz
2274	3962	129.729	193.022	17145.7	1.48789	536.983	0.672095	1	101.509	612.696	109.352	147.789	1.15714	0.746835	qz
2278	3966	132.309	195.927	19586.9	1.48084	573.167	0.675294	1	108.349	699.93	0.159831	157.96	1.15559	0.748848	qz
2279	3971	75.4386	162.194	8505.6	2.15001	404.412	0.465113	1	76.4485	303.944	72.7809	104.092	1.23731	0.653199	qz
2280	3972	170.771	250.537	26074	1.46709	719.133	0.681621	1	135.942	931.742	86.9353	182.25	1.25664	0.633254	qz
2283	3975	171.348	287.202	31111.7	1.67613	898.382	0.596613	1	169.827	1111.76	53.3914	199.08	1.43716	0.484162	qz
2285	3987	120.661	137.899	10567.4	1.14286	423.384	0.875	1	80.0348	377.622	120.964	116.024	1.16213	0.740438	qz
2290	3999	82.8353	145.126	8749.21	1.75199	393.987	0.57078	1	74.4777	312.649	69.0716	105.572	1.18851	0.707937	qz
2292	4001	76.4616	123.699	6790.85	1.61779	335.234	0.618128	1	63.3713	242.668	11.5837	93.0095	1.14787	0.758956	qz
2298	4013	97.1637	185.464	9956.75	1.90878	478.207	0.523895	1	90.3982	355.8	109.654	112.622	1.35227	0.54686	qz
2303	4023	97.025	137.173	8834.14	1.41379	385.426	0.707317	1	72.8593	315.684	71.5651	106.083	1.15708	0.746917	qz
2305	4025	111.343	232.756	15262.7	2.09045	592.594	0.478366	1	112.022	545.406	165.31	139.438	1.35346	0.545891	qz
2312	4039	99.1391	144.945	8856.86	1.46203	408.656	0.683979	1	77.2506	316.496	51.3402	106.22	1.22524	0.666123	qz
2313	4040	68.2032	158.856	7539.85	2.32915	429.544	0.429341	1	81.1993	269.433	89.8721	98.0046	1.39583	0.513259	qz
2314	4041	126.133	254.366	21187.1	2.01664	621.108	0.495874	1	117.412	757.111	77.1498	164.286	1.20403	0.689806	qz
2315	4042	84.8705	133.741	8684.45	1.57583	383.519	0.634588	1	72.4988	310.335	9.99362	105.181	1.16124	0.741583	qz
2317	4044	85.9635	170.425	8744.53	1.98252	416.434	0.504407	1	78.7211	312.482	50.9346	105.544	1.25656	0.633334	qz
2318	4045	144.777	238.382	23565.1	1.64654	692.129	0.607333	1	130.837	842.09	135.641	173.261	1.27221	0.617854	qz
2319	4046	110.918	177.61	11186.8	1.60127	482.497	0.624503	1	91.2092	399.757	83.767	119.376	1.2872	0.603543	qz
2327	4065	100.431	159.17	11892.3	1.58486	426.607	0.630971	1	80.644	424.968	76.5607	123.083	1.10382	0.820732	qz
2328	4066	127.299	350.458	25624.1	2.75303	947.475	0.363236	1	179.107	915.667	104.62	180.672	1.67012	0.358511	qz
2330	4068	145.533	275.294	18467.8	1.89162	739.861	0.528647	1	139.86	659.939	78.7556	153.381	1.5362	0.423745	qz
2333	4071	96.9154	215.136	15178.5	2.21983	549.739	0.450485	1	103.92	542.396	112.143	139.053	1.25907	0.630817	qz
2340	4088	126.325	174.599	15173.1	1.38214	499.553	0.723517	1	94.4335	542.203	79.6872	139.028	1.14433	0.763659	qz
2345	4101	146.859	218.111	20829.9	1.48518	615.872	0.67332	1	116.422	744.346	160.123	162.895	1.20407	0.689756	qz
2349	4105	126.113	168.812	15251.7	1.33857	541.314	0.747065	1	102.328	545.012	170.536	139.388	1.23679	0.653744	qz
2350	4106	106.659	145.458	10882.7	1.36376	427.237	0.733265	1	80.7632	388.89	86.2966	117.743	1.15559	0.74884	qz
2352	4110	83.3333	147.381	7750.94	1.76857	373.612	0.565429	1	70.626	276.977	7.13156	99.3671	1.19742	0.697435	qz
2353	4111	93.7011	240.015	14898.9	2.5615	587.717	0.390396	1	111.1	532.405	71.0141	137.766	1.35862	0.54176	qz
2354	4112	134.872	188.62	16218.8	1.39851	582.527	0.715048	1	110.119	579.571	66.9971	143.739	1.29066	0.600309	qz
2357	4119	96.9885	154.03	10328.8	1.58812	436.327	0.629674	1	82.4815	369.094	161.654	114.707	1.21141	0.681419	qz
2358	4120	97.4744	224.051	14535.7	2.29857	576.38	0.435054	1	108.957	519.426	73.6105	136.076	1.34895	0.549549	qz
2361	4123	115.844	192.669	12942	1.66317	537.657	0.601261	1	101.637	462.479	40.3644	128.4	1.33355	0.562317	qz
2362	4125	87.1345	109.439	6970.9	1.25598	334.296	0.796193	1	63.194	249.102	86.6182	94.2344	1.12978	0.783457	qz
2363	4126	129.633	169.341	15844.7	1.30631	524.612	0.765517	1	99.1704	566.205	96.8489	142.072	1.17598	0.723101	qz
2364	4130	110.563	199.708	12036.6	1.80628	544.877	0.553623	1	103.001	430.122	116.045	123.827	1.40137	0.509208	qz
2366	4132	110.637	146.228	9112.6	1.32169	436.758	0.756609	1	82.563	325.635	108.065	107.742	1.291	0.599997	qz
2367	4133	110.402	214.62	12140.4	1.94398	566.189	0.514409	1	107.03	433.831	129.806	124.36	1.44994	0.475662	qz
2369	4142	74.128	122.619	6427.68	1.65415	315.517	0.604539	1	59.644	229.691	87.2225	90.4883	1.11045	0.81096	qz
2370	4143	87.7886	149.595	10480.9	1.70404	412.039	0.58684	1	77.8901	374.531	53.7541	115.549	1.13565	0.775378	qz
2371	4144	120.903	219.561	18545.5	1.816	574.455	0.550659	1	108.593	662.715	72.4626	153.704	1.19026	0.705855	qz
2377	4157	107.353	198.659	14970.7	1.85052	529.424	0.540389	1	100.08	534.973	80.0836	138.098	1.22092	0.670851	qz
2378	4158	88.9835	148.966	9090.71	1.67409	384.451	0.597339	1	72.675	324.853	106.744	107.613	1.13775	0.772515	qz
2385	4170	91.9592	104.281	7338.19	1.13399	335.049	0.88184	1	63.3363	262.227	68.0531	96.6851	1.10362	0.821035	qz
2387	4175	57.9409	171.991	7001.85	2.96838	389.744	0.336884	1	73.6756	250.208	75.6145	94.4434	1.31425	0.578953	qz
2391	4179	81.7449	104.981	7152.35	1.28425	313.828	0.778665	1	59.3249	255.586	84.6814	95.453	1.04706	0.912124	qz
2393	4181	100.949	145.179	9995.16	1.43814	427.63	0.695341	1	80.8375	357.173	40.6482	112.839	1.20692	0.686503	qz
2394	4192	84.9314	113.597	7438.27	1.33752	342.237	0.747654	1	64.6951	265.803	141.724	97.3422	1.11969	0.797641	qz
2400	4198	169.331	195.755	22193.7	1.15605	652.031	0.865013	1	123.257	793.083	179.945	168.144	1.23498	0.655667	qz
2401	4199	78.8751	185.375	8983.32	2.35023	464.443	0.42549	1	87.7964	321.015	94.5877	106.975	1.38267	0.523072	qz
2403	4209	64.9665	168.913	8812.27	2.6	413.631	0.384615	1	78.1911	314.903	92.3859	105.952	1.2433	0.646921	qz
2404	4210	153.828	256.997	27288.9	1.67068	726.785	0.598559	1	137.388	975.158	93.1798	186.448	1.24142	0.64888	qz
2407	4219	170.86	218.624	23060.3	1.27955	710.407	0.781526	1	134.292	824.049	6.99446	171.395	1.32002	0.573905	qz
2414	4234	68.8046	116.467	6140.61	1.69272	316.665	0.590766	1	59.8611	219.432	90.1893	88.4445	1.14025	0.76913	qz
2415	4235	108.255	159.148	8499.29	1.47012	476.71	0.680214	1	90.1153	303.718	93.6097	104.053	1.45904	0.469747	qz
2421	4241	93.0096	167.001	9241.15	1.79552	458.526	0.556941	1	86.678	330.228	15.9454	108.5	1.34588	0.552061	qz
2422	4249	158.772	284.325	24522.8	1.79077	759.949	0.558418	1	143.658	876.311	90	176.746	1.36932	0.533322	qz
2429	4262	226.452	454.945	62000.7	2.00901	1329.94	0.497757	1	251.406	2215.57	105.785	281.037	1.50709	0.440274	qz
2434	4274	88.1964	209.267	13865.9	2.37274	521.185	0.421453	1	98.5227	495.493	82.212	132.904	1.24889	0.641142	qz
2435	4275	93.618	171.48	11067.7	1.8317	448.683	0.545941	1	84.8172	395.5	107.086	118.739	1.20342	0.690507	qz
2439	4279	113.529	306.854	18928	2.70287	760.236	0.369977	1	143.712	676.383	118.217	155.281	1.5592	0.411337	qz
2443	4292	145.828	168.026	11903.2	1.15222	595.135	0.867891	1	112.502	425.357	134.468	123.14	1.53918	0.422107	qz
2446	4299	226.2	332.904	57146.4	1.47173	997.061	0.679474	1	188.48	2042.1	89.3751	269.811	1.17688	0.721995	qz
2451	4309	69.3349	146.486	7428.08	2.11273	366.511	0.473321	1	69.2837	265.439	109.128	97.2755	1.19992	0.694532	qz
2452	4310	149.644	183.673	19028.2	1.22739	558.288	0.814735	1	105.536	679.964	102.607	155.691	1.142	0.766779	qz
2454	4312	190.903	292.848	35737.9	1.53401	940.918	0.651886	1	177.867	1277.08	98.427	213.368	1.4044	0.507009	qz
2456	4320	182.649	289.011	26942.2	1.58233	907.374	0.631979	1	171.526	962.769	69.444	185.26	1.55982	0.411008	qz
2457	4321	96.4397	129.771	9290.96	1.34562	381.747	0.743153	1	72.1638	332.009	12.5978	108.792	1.11751	0.800756	qz
2458	4322	124.209	151.047	13542.6	1.21607	542.283	0.822324	1	102.511	483.939	16.0553	131.346	1.31486	0.578416	qz
2459	4323	124.169	241.642	18413.3	1.94607	626.244	0.513856	1	118.383	657.993	62.8341	153.155	1.30222	0.589705	qz
2460	4324	63.7452	158.855	8619.12	2.49203	403.629	0.40128	1	76.3003	308	90.0046	104.784	1.22675	0.664489	qz
2465	4329	97.751	162.15	10854.9	1.6588	437.719	0.602844	1	82.7446	387.895	95.1159	117.592	1.18546	0.711581	qz
2467	4335	86.7748	151.043	9529.69	1.74063	407.318	0.574504	1	76.9976	340.539	76.805	110.18	1.17733	0.721443	qz
2469	4337	104.749	180.02	12713.2	1.71859	516.289	0.581871	1	97.5972	454.301	95.7106	127.26	1.29203	0.599043	qz
2471	4341	375.279	967.817	224532	2.57893	2998.83	0.387758	1	566.886	8023.55	95.1398	534.816	1.78574	0.313592	qz
2472	4342	81.1777	103.625	5950.52	1.27652	301.954	0.783377	1	57.0801	212.639	74.7715	87.0648	1.10451	0.819718	qz
2476	4346	95.2924	113.916	8517.04	1.19544	348.873	0.836515	1	65.9495	304.353	115.291	104.162	1.06666	0.87891	qz
2483	4359	103.466	169.741	11265.8	1.64054	475.139	0.609555	1	89.8184	402.58	67.5433	119.797	1.26312	0.626775	qz
2487	4370	88.7901	138.148	7802.15	1.55589	383.605	0.642718	1	72.5151	278.807	164.277	99.6948	1.22541	0.665941	qz
2489	4372	78.9001	128.588	6299.02	1.62976	365.443	0.613586	1	69.0818	225.093	136.696	89.578	1.29924	0.592412	qz
2491	4379	86.0216	175.287	11242.9	2.03771	454.758	0.490747	1	85.9657	401.759	88.658	119.675	1.21017	0.682819	qz
2492	4380	83.7893	108.284	6473.15	1.29234	317.006	0.77379	1	59.9255	231.315	171.87	90.8078	1.11177	0.809041	qz
2495	4383	116.531	161.883	13508.6	1.38918	459.974	0.719851	1	86.9517	482.722	83.367	131.181	1.11669	0.801921	qz
2500	4393	82.8814	116.138	6230.79	1.40126	320.159	0.713646	1	60.5216	222.655	3.69514	89.0916	1.14446	0.763485	qz
2502	4395	81.549	110.044	6927.51	1.34942	315.663	0.741057	1	59.6717	247.552	168.623	93.9407	1.07014	0.873208	qz
2506	4399	209.742	404.087	41356.3	1.92659	1208.73	0.519052	1	228.493	1477.85	124.992	229.528	1.67711	0.355529	qz
2507	4400	98.6709	120.369	7673.35	1.21991	355.688	0.819736	1	67.2378	274.204	94.0856	98.8685	1.14573	0.761791	qz
2509	4407	140.169	250.501	24175.8	1.78714	722.174	0.559552	1	136.517	863.911	94.6606	175.491	1.31056	0.58222	qz
2513	4415	239.638	404.241	56214.9	1.68688	1220.72	0.592809	1	230.761	2008.82	115.017	267.603	1.45277	0.473812	qz
2514	4416	97.3629	281.69	18010.5	2.8932	710.912	0.345638	1	134.388	643.599	93.4372	151.471	1.49471	0.447595	qz
2516	4418	114.328	202.716	14934.1	1.77311	534.818	0.563982	1	101.1	533.664	70.71	137.929	1.23487	0.655779	qz
2517	4424	79.7948	107.395	6001.35	1.34589	303.986	0.743003	1	57.4643	214.456	74.7867	87.4359	1.10722	0.815701	qz
2518	4425	85.5208	124.272	8077.72	1.45312	356.777	0.688174	1	67.4438	288.654	72.646	101.44	1.1201	0.797046	qz
2522	4430	136.748	266.027	23172.1	1.94537	735.211	0.51404	1	138.981	828.047	103.516	171.81	1.36281	0.538433	qz
2525	4439	82.3694	109.053	6047.28	1.32395	306.06	0.755317	1	57.8564	216.097	50.4547	87.7698	1.11053	0.810841	qz
2526	4440	138.708	262.263	25716	1.89076	699.555	0.528888	1	132.241	918.95	79.51	180.995	1.23091	0.660007	qz
2527	4441	169.157	271.72	31071	1.60631	895.064	0.622544	1	169.199	1110.31	38.4137	198.949	1.43279	0.487121	qz
2528	4442	82.5686	115.249	7207.54	1.3958	341.068	0.716434	1	64.4742	257.558	65.3694	95.8206	1.13358	0.778204	qz
2529	4443	103.524	156.546	9955.68	1.51218	510.255	0.661297	1	96.4566	355.762	129.698	112.616	1.44297	0.48027	qz
2530	4444	107.998	314.439	19367	2.91152	774.734	0.343463	1	146.452	692.073	93.3094	157.071	1.57082	0.405273	qz
2531	4445	126.251	262.324	23430.1	2.0778	680.534	0.481278	1	128.645	837.266	83.5451	172.764	1.25449	0.635426	qz
2536	4457	394.477	1032.96	228696	2.61857	2663.78	0.381888	1	503.55	8172.37	82.2118	539.753	1.57172	0.404811	qz
2540	4461	77.6493	116.471	6832.64	1.49997	338.345	0.66668	1	63.9593	244.162	112.102	93.2952	1.15497	0.749652	qz
2542	4463	131.757	172.361	18354.6	1.30818	576.785	0.764422	1	109.033	655.893	101.31	152.91	1.20129	0.692957	qz
2545	4473	144.727	187.581	18288.2	1.2961	570.135	0.771547	1	107.776	653.521	42.7226	152.634	1.18959	0.706652	qz
2546	4474	182.3	211.251	23903.7	1.15881	694.649	0.862954	1	131.314	854.188	40.1009	174.501	1.26776	0.622192	qz
2547	4475	97.141	138.784	10708.4	1.42868	402.301	0.699944	1	76.0494	382.661	86.0431	116.796	1.09697	0.831022	qz
2548	4476	130.653	181.793	14299.2	1.39141	564.27	0.718694	1	106.667	510.975	116.04	134.965	1.33149	0.564063	qz
2552	4480	89.3142	144.946	9045.27	1.62287	407.996	0.616191	1	77.126	323.229	140.16	107.344	1.21046	0.682494	qz
2553	4481	98.2861	203.193	12335.3	2.06736	544.913	0.483709	1	103.008	440.797	112.045	125.355	1.38439	0.521777	qz
2555	4488	106.572	155.602	12508.7	1.46006	447.813	0.684905	1	84.6528	446.994	86.4939	126.233	1.12979	0.783445	qz
2558	4491	134.087	215.055	21369.7	1.60385	627.206	0.623501	1	118.564	763.638	91.6689	164.993	1.21064	0.682289	qz
2559	4492	337.789	460.606	90980.8	1.36359	1702.65	0.733357	1	321.862	3251.16	91.3781	340.44	1.59278	0.394175	qz
2560	4493	81.589	209.159	9529.34	2.56357	517.796	0.390081	1	97.8821	340.527	84.2909	110.178	1.49669	0.446411	qz
2562	4495	85.39	325.804	18144	3.81549	749.039	0.26209	1	141.595	648.367	86.8202	152.031	1.56907	0.406175	qz
2563	4496	85.1319	179.106	11273.4	2.10387	460.674	0.475315	1	87.0838	402.852	109.243	119.838	1.22425	0.667205	qz
2565	4502	94.4448	160.041	8362.51	1.69455	431.135	0.590128	1	81.4999	298.831	85.6916	103.213	1.3303	0.565068	qz
2566	4503	92.2681	151.609	9508.39	1.64313	404.503	0.608593	1	76.4656	339.778	74.0795	110.057	1.17051	0.729881	qz
2567	4504	207.557	317.01	38673.8	1.52734	1090.14	0.654734	1	206.075	1381.99	48.8812	221.959	1.56415	0.408737	qz
2568	4505	145.332	191.864	17319.6	1.32018	556.169	0.757474	1	105.136	618.909	65.5187	148.537	1.19246	0.703256	qz
2569	4506	181.102	304.597	30661.1	1.68191	1020.75	0.594562	1	192.959	1095.66	34.2157	197.633	1.64487	0.369604	qz
2570	4509	216.014	440.124	65953.2	2.03748	1159.33	0.490803	1	219.155	2356.81	96.5094	289.856	1.27378	0.616326	qz
2574	4513	175.034	211.197	28449.2	1.2066	679.557	0.828774	1	128.461	1016.62	89.7818	190.371	1.13683	0.773761	qz
2576	4522	123.926	139.287	12344.4	1.12396	451.938	0.889715	1	85.4326	441.12	110.437	125.401	1.14776	0.759101	qz
2577	4523	126.551	358.002	24774.8	2.82892	871.57	0.353492	1	164.758	885.317	71.2428	177.652	1.56244	0.409633	qz
2578	4524	83.6542	103.29	6950.52	1.23472	334.535	0.809899	1	63.2391	248.374	86.8202	94.0966	1.13224	0.780053	qz
2579	4525	109.189	363.932	28340.5	3.33305	928.358	0.300025	1	175.493	1012.74	96.894	190.007	1.55603	0.413015	qz
2581	4527	121.173	148.518	10776.8	1.22567	463.097	0.815881	1	87.5419	385.104	75.8837	117.168	1.25873	0.631153	qz
2583	4531	216.135	247.948	34027	1.14719	924.569	0.871696	1	174.777	1215.94	170.158	208.198	1.41427	0.499959	qz
2585	4533	127.973	203.201	18164.1	1.58784	593.595	0.629786	1	112.211	649.085	92.4984	152.115	1.24276	0.647474	qz
2586	4534	84.4798	129.747	7332.61	1.53583	361.967	0.651112	1	68.4248	262.028	125.893	96.6483	1.19274	0.702927	qz
2587	4535	84.4395	193.863	10596.5	2.29588	505.322	0.435563	1	95.5241	378.662	122.848	116.184	1.38513	0.521214	qz
2588	4537	100.819	114.853	8313.01	1.1392	384.326	0.877806	1	72.6515	297.062	28.6105	102.907	1.1894	0.706883	qz
2589	4538	131.716	173.69	18261.3	1.31868	542.522	0.758337	1	102.556	652.558	28.7626	152.521	1.13281	0.779264	qz
2592	4542	53.0608	285.639	10384	5.38325	606.218	0.185761	1	114.597	371.066	89.9441	115.013	1.67862	0.354891	qz
2597	4550	64.7684	127.515	5799.8	1.96878	329.538	0.507928	1	62.2945	207.254	72.7193	85.9551	1.22097	0.670799	qz
2598	4559	68.7566	143.773	7235.11	2.09105	360.859	0.478229	1	68.2153	258.544	108.058	96.0037	1.19707	0.697846	qz
2600	4561	115.148	248.863	19948.6	2.16124	657.532	0.462697	1	124.297	712.855	73.6363	159.412	1.31361	0.579519	qz
2605	4570	85.8283	221.011	12847	2.57504	566.095	0.388343	1	107.012	459.082	114.624	127.928	1.40927	0.503515	qz
2607	4579	99.2801	193.007	12048.2	1.94407	491.3	0.514385	1	92.8733	430.539	117.897	123.887	1.26296	0.626932	qz
2608	4580	145.52	263.431	23289.8	1.81028	800.116	0.552402	1	151.251	832.251	88.0251	172.245	1.47936	0.45693	qz
2609	4581	83.9843	299.773	18979.8	3.56939	705.912	0.28016	1	133.443	678.234	97.4178	155.493	1.44581	0.478386	qz
2611	4583	49.357	218.127	8403.01	4.41937	493.957	0.226277	1	93.3757	300.278	86.3823	103.462	1.52047	0.432559	qz
2612	4588	237.182	311.039	41080.3	1.31139	1084.17	0.762548	1	204.946	1467.99	144.545	228.761	1.50933	0.438967	qz
2615	4591	94.0057	108.175	7183.93	1.15073	360.895	0.869014	1	68.2222	256.715	51.2903	95.6635	1.20145	0.69277	qz
2617	4596	186.479	246.017	30311.8	1.31928	713.864	0.757992	1	134.946	1083.18	12.5288	196.504	1.15695	0.747087	qz
2620	4599	92.6272	305.791	17904.2	3.30131	718.307	0.30291	1	135.786	639.797	97.2351	151.023	1.51474	0.435836	qz
2622	4607	131.863	217.432	18723.4	1.64892	598.647	0.606458	1	113.166	669.074	90.5875	154.439	1.23448	0.656196	qz
2623	4608	85.9547	145.329	9889.9	1.69076	409.678	0.591451	1	77.4439	353.411	104.624	112.243	1.16239	0.74011	qz
2625	4610	105.432	194.614	13021.6	1.84587	491.009	0.541749	1	92.8183	465.321	147.31	128.795	1.21412	0.678383	qz
2626	4611	99.0119	200.209	14276	2.02207	528.109	0.494542	1	99.8316	510.146	103.398	134.855	1.24717	0.642907	qz
2633	4626	113.05	213.361	19412.6	1.88731	611.6	0.529853	1	115.614	693.703	82.4054	157.256	1.2386	0.651838	qz
2635	4628	74.1872	127.526	7798.06	1.71897	370.711	0.581743	1	70.0777	278.66	90.0288	99.6686	1.18453	0.712697	qz
2638	4631	116.622	171.566	10975.4	1.47112	469.212	0.679753	1	88.698	392.2	110.732	118.243	1.26376	0.626138	qz
2640	4633	105.798	256.257	15784.9	2.42214	694.12	0.412859	1	131.214	564.066	95.7454	141.803	1.5589	0.411492	qz
2642	4636	123.09	267.965	21222.4	2.17698	755.998	0.459352	1	142.911	758.374	91.9092	164.423	1.46429	0.466384	qz
2648	4642	130.722	144.375	13108.6	1.10445	495.797	0.905431	1	93.7235	468.429	170.226	129.224	1.22189	0.669788	qz
2649	4648	183.664	448.735	44760.6	2.44325	1197.99	0.409292	1	226.464	1599.5	69.604	238.788	1.59776	0.391721	qz
2653	4656	81.466	174.541	9434.34	2.1425	453.059	0.466745	1	85.6444	337.132	126.87	109.628	1.31615	0.577287	qz
2654	4657	81.1359	108.92	5640.9	1.34245	338.292	0.744909	1	63.9494	201.575	140.727	84.7694	1.27094	0.619089	qz
2655	4658	120.604	198.341	14484	1.64457	565.571	0.608063	1	106.913	517.578	136.971	135.834	1.32602	0.568725	qz
2656	4659	239.508	350.241	41751.8	1.46234	1110.43	0.683837	1	209.91	1491.98	24.4211	230.623	1.53341	0.425291	qz
2660	4667	116.363	198.818	15196.3	1.7086	552.733	0.585276	1	104.486	543.035	82.8454	139.134	1.26518	0.624737	qz
2662	4669	109.764	176.972	13578.9	1.6123	514.343	0.620233	1	97.2294	485.238	83.5723	131.522	1.24545	0.644688	qz
2663	4670	206.619	585.057	76613.3	2.83157	1442.76	0.353161	1	272.733	2737.74	84.4278	312.405	1.47078	0.462282	qz
2664	4671	97.1099	153.485	7572.76	1.58053	407.181	0.632698	1	76.9718	270.609	135.789	98.2182	1.32028	0.573679	qz
2665	4672	116.17	171.122	11877.2	1.47304	506.821	0.678869	1	95.8073	424.426	153.173	123.005	1.31221	0.580757	qz
2667	4676	115.803	238.687	19274.1	2.06115	603.499	0.485167	1	114.083	688.75	87.644	156.694	1.22658	0.664675	qz
2671	4683	131.601	174.459	14190.2	1.32567	578.501	0.754338	1	109.358	507.081	96.0601	134.45	1.3703	0.532561	qz
2673	4685	307.153	342.87	63774	1.11628	1306.71	0.89583	1	247.014	2278.94	90.196	285.028	1.46003	0.469113	qz
2676	4692	148.956	238.813	19572.8	1.60325	730.902	0.623734	1	138.167	699.427	137.003	157.904	1.47414	0.460177	qz
2677	4693	103.028	191.169	12788.2	1.85551	471.618	0.538937	1	89.1527	456.982	133.612	127.635	1.17677	0.722138	qz
2680	4704	176.678	270.702	28216.5	1.53217	752.975	0.652668	1	142.339	1008.3	107.128	189.591	1.26484	0.625073	qz
2684	4708	116.886	159.044	12116.2	1.36067	439.524	0.734932	1	83.0859	432.968	84.392	124.236	1.12669	0.787755	qz
2687	4716	103.264	238.91	16528.9	2.31357	589.323	0.432232	1	111.403	590.653	92.5789	145.107	1.29341	0.59776	qz
2688	4717	89.9947	214.047	11581.2	2.37844	540.809	0.420443	1	102.232	413.849	140.906	121.462	1.41799	0.497341	qz
2690	4721	109.821	134.082	9898.17	1.22091	395.865	0.81906	1	74.8327	353.707	48.0128	112.29	1.12273	0.793323	qz
2696	4727	122.511	136.275	10109.7	1.11235	464.256	0.898999	1	87.761	361.266	99.3554	113.484	1.30285	0.589134	qz
2698	4729	247.931	582.15	76516.8	2.34803	1706.06	0.425889	1	322.507	2734.3	93.2453	312.208	1.74029	0.330185	qz
2699	4732	187.648	368.793	47759.3	1.96535	980.698	0.508816	1	185.387	1706.66	82.4921	246.657	1.26623	0.623702	qz
2702	4735	101.053	182.67	13131.4	1.80767	506.343	0.553199	1	95.717	469.243	78.6394	129.336	1.2468	0.643295	qz
2706	4749	83.0543	175.222	8586.67	2.10973	431.002	0.473995	1	81.4748	306.841	52.5946	104.587	1.31242	0.580572	qz
2709	4752	118.278	172.943	12468.4	1.46217	495.284	0.683915	1	93.6265	445.551	32.8742	126.029	1.25157	0.638395	qz
2711	4754	71.0786	207.779	10965.3	2.92322	484.223	0.342088	1	91.5355	391.842	87.3974	118.189	1.30479	0.587383	qz
2712	4755	84.9796	113.581	6311.93	1.33657	312.097	0.748186	1	58.9976	225.554	152.104	89.6698	1.10845	0.8139	qz
2713	4756	93.6756	158.515	9762.67	1.69217	420.139	0.590958	1	79.4213	348.865	109.604	111.519	1.19981	0.69466	qz
2716	4763	189.512	306.182	33956.6	1.61563	1010.64	0.618953	1	191.047	1213.42	143.867	207.983	1.54753	0.417565	qz
2717	4764	149.292	228.84	23822.2	1.53283	650.186	0.652388	1	122.908	851.277	124.767	174.203	1.18864	0.707778	qz
2720	4767	107.786	200.134	13091.1	1.85678	524.893	0.538568	1	99.2236	467.807	92.3209	129.138	1.29446	0.596796	qz
2721	4768	78.1867	241.593	12189.8	3.08995	571.909	0.32363	1	108.111	435.599	93.1526	124.613	1.46161	0.468095	qz
2723	4774	115.011	257.509	18882.5	2.239	651.395	0.446628	1	123.137	674.756	97.5942	155.094	1.33758	0.558933	qz
2725	4776	133.484	187.682	16599.9	1.40603	533.529	0.711224	1	100.856	593.19	40.5518	145.418	1.16845	0.732452	qz
2730	4786	130.882	271.597	19737.8	2.07513	818.336	0.481896	1	154.695	705.322	101.119	158.568	1.64357	0.370191	qz
2733	4793	116.501	162.815	13975.4	1.39754	497.006	0.715545	1	93.952	499.404	46.8476	133.428	1.18627	0.710607	qz
2735	4802	100.883	112.425	8392.97	1.11441	353.688	0.897332	1	66.8598	299.919	49.3553	103.401	1.08935	0.842683	qz
2737	4804	127.873	231.274	16402.9	1.80862	600.034	0.552908	1	113.428	586.152	78.8753	144.553	1.32197	0.572216	qz
2738	4805	107.765	186.53	14056.6	1.73091	480.211	0.577732	1	90.7772	502.306	79.374	133.815	1.14287	0.765606	qz
2739	4806	105.002	173.337	12532	1.6508	464.969	0.605767	1	87.8959	447.827	139.399	126.35	1.17197	0.728054	qz
2748	4821	75.8328	146.478	7674.74	1.93159	356.642	0.517709	1	67.4182	274.253	127.875	98.8774	1.1487	0.757858	qz
2753	4837	105.857	153.414	11350.1	1.44926	448.521	0.690007	1	84.7866	405.592	89.9318	120.245	1.18792	0.708638	qz
2754	4838	158.7	222.712	20708.8	1.40335	632.944	0.71258	1	119.649	740.021	90	162.421	1.24106	0.649253	qz
2755	4839	100.532	116.415	8558.44	1.15799	372.197	0.863563	1	70.3586	305.832	0.246712	104.415	1.13522	0.775958	qz
2759	4852	132.437	204.102	14494.3	1.54113	629.587	0.648876	1	119.015	517.948	108.468	135.883	1.47558	0.459278	qz
2760	4853	83.7926	145.45	9009.39	1.73583	391.003	0.576093	1	73.9137	321.947	98.6245	107.13	1.16235	0.740158	qz
2762	4861	121.891	257.744	20706.7	2.11456	646.595	0.472913	1	122.23	739.946	64.2307	162.413	1.26789	0.622066	qz
2763	4862	76.7922	127.929	7528.16	1.66591	352.687	0.600273	1	66.6705	269.016	98.9762	97.9286	1.14696	0.760152	qz
2770	4875	96.4893	182.155	11565.4	1.88782	494.163	0.529711	1	93.4146	413.283	100.32	121.379	1.29657	0.594851	qz
2771	4876	114.65	204.788	15391	1.7862	598.458	0.559848	1	113.13	549.992	104.357	140.023	1.36115	0.539747	qz
2773	4881	88.0091	100.779	7199.07	1.1451	335.378	0.873285	1	63.3985	257.256	100.32	95.7643	1.11532	0.803892	qz
2774	4882	74.158	111.104	6036.22	1.4982	312.213	0.667467	1	59.0195	215.702	89.848	87.6895	1.1339	0.777771	qz
2775	4883	94.0395	110.646	7840.75	1.17659	370.808	0.849915	1	70.0961	280.186	9.03153	99.9411	1.18161	0.716223	qz
2780	4888	116.66	165.915	12868.7	1.42221	509.06	0.703131	1	96.2306	459.858	148.261	128.036	1.26621	0.623716	qz
2781	4889	96.0621	156.461	11056.8	1.62874	418.463	0.61397	1	79.1046	395.109	102.095	118.681	1.12292	0.793055	qz
2787	4902	80.6418	196.675	11214.1	2.43888	490.23	0.410025	1	92.671	400.733	96.5451	119.522	1.30624	0.586079	qz
2788	4906	97.536	128.784	8565.1	1.32038	377.836	0.757359	1	71.4246	306.07	4.24026	104.456	1.15197	0.753554	qz
2794	4912	199.738	353.071	35420.6	1.76767	1148.03	0.565716	1	217.02	1265.74	63.9617	212.419	1.7212	0.337549	qz
2797	4915	78.8735	203.576	11490.4	2.58104	511.926	0.387441	1	96.7724	410.605	46.8476	120.985	1.34755	0.550695	qz
2803	4931	123.329	161.269	12064.7	1.30763	518.898	0.76474	1	98.0903	431.127	111.402	123.972	1.333	0.562785	qz
2805	4933	163.129	220.335	25854.2	1.35068	692.76	0.740368	1	130.956	923.89	69.7751	181.481	1.21569	0.676637	qz
2807	4935	82.9887	146.32	8646.72	1.76313	401.196	0.567172	1	75.8404	308.987	82.875	104.952	1.21741	0.674727	qz
2815	4950	109.054	156.284	11770.5	1.43309	454.845	0.697793	1	85.982	420.615	85.778	122.451	1.18296	0.714593	qz
2821	4956	85.2154	163.238	7622.21	1.91559	441.892	0.522032	1	83.5334	272.376	116.561	98.5384	1.42817	0.490274	qz
2823	4963	216.028	325.537	30039.9	1.50692	1015.83	0.663604	1	192.029	1073.46	30.4942	195.621	1.65378	0.365631	qz
2825	4965	83.1757	121.714	6704.2	1.46333	337.053	0.683371	1	63.715	239.572	102.924	92.4142	1.16153	0.74121	qz
2826	4966	132.25	190.44	17568.5	1.44	516.81	0.694444	1	97.6957	627.805	90	149.601	1.10019	0.826158	qz
2828	4968	117.374	194.271	12877.9	1.65514	539.342	0.604177	1	101.955	460.188	102.995	128.082	1.34105	0.556043	qz
2830	4974	84.631	143.147	9503.28	1.69143	398.965	0.591216	1	75.4188	339.596	90.0428	110.028	1.15479	0.749882	qz
2831	4975	162.07	211.672	22447.3	1.30605	634.365	0.765666	1	119.918	802.145	70.7401	169.101	1.19471	0.700609	qz
2832	4976	64.5137	132.342	6087.37	2.05138	329.433	0.487477	1	62.2747	217.53	38.1572	88.0603	1.1914	0.704506	qz
2833	4980	98.0206	138.517	9059.49	1.41314	388.692	0.707642	1	73.4767	323.737	28.0725	107.428	1.15228	0.753152	qz
2835	4982	136.684	245.103	20878.2	1.79321	691.666	0.55766	1	130.75	746.073	72.6848	163.084	1.35069	0.548138	qz
2837	4987	91.6231	143.401	10050	1.56511	409.965	0.638931	1	77.4981	359.134	104.079	113.149	1.1539	0.751041	qz
2839	4989	248.531	412.643	49528.3	1.66033	1168.29	0.60229	1	220.849	1769.87	49.6355	251.184	1.48126	0.455764	qz
2840	4990	113.916	254.332	19087.7	2.23262	652.667	0.447904	1	123.378	682.091	113.199	155.934	1.33297	0.562807	qz
2841	4991	117.413	146.141	12745	1.24468	451.518	0.803422	1	85.3531	455.437	15.3163	127.419	1.12852	0.785199	qz
2842	4992	104.332	158.189	11380.5	1.51622	449.493	0.659537	1	84.9703	406.678	105.343	120.405	1.1889	0.707467	qz
2848	5002	124.897	145.213	11555	1.16266	446.707	0.860094	1	84.4437	412.912	11.9228	121.325	1.17258	0.727299	qz
2849	5003	142.164	205.433	18173.7	1.44504	589.908	0.692023	1	111.514	649.428	11.5338	152.155	1.23472	0.655939	qz
2855	5025	104.408	177.68	13094.5	1.70178	489.414	0.58762	1	92.5168	467.926	90.4948	129.155	1.20681	0.686634	qz
2856	5026	217.115	431.836	41454	1.98898	1247.33	0.502771	1	235.79	1481.34	86.5706	229.799	1.72864	0.334651	qz
2857	5030	71.8335	113.755	6367.57	1.5836	307.589	0.631473	1	58.1454	227.543	67.4947	90.0642	1.08765	0.845321	qz
2862	5035	183.926	420.032	31966	2.28371	1151.61	0.437884	1	217.696	1142.29	77.5926	201.794	1.81747	0.302736	qz
2863	5036	94.0328	95.769	6913.86	1.01846	336.331	0.981871	1	63.5786	247.064	85.5814	93.8481	1.14133	0.767675	qz
2864	5037	135.678	143.239	13161.6	1.05573	498.417	0.947214	1	94.2187	470.323	96.4938	129.485	1.22587	0.665444	qz
2865	5038	176.754	340.087	29233.4	1.92407	904.932	0.519731	1	171.065	1044.64	76.3532	192.977	1.49342	0.448371	qz
2866	5039	160.285	311.149	30175.3	1.94122	877.793	0.51514	1	165.934	1078.3	85.5028	196.061	1.42584	0.491877	qz
2867	5043	268.243	730.131	108160	2.7219	2011.55	0.36739	1	380.255	3865.06	91.3972	371.192	1.72585	0.335734	qz
2869	5045	116.959	195.529	14032.2	1.67178	549.867	0.598167	1	103.945	501.435	64.0753	133.699	1.30978	0.582908	qz
2870	5046	97.2555	164.669	10853.1	1.69316	459.635	0.590611	1	86.8875	387.83	45	117.582	1.24492	0.645232	qz
2876	5057	94.1253	195.665	12168.2	2.07877	508.936	0.481054	1	96.2072	434.827	75.2322	124.503	1.30183	0.590052	qz
2877	5058	125.566	253.391	17239.5	2.01799	709.83	0.495543	1	134.183	616.046	64.7223	148.193	1.52545	0.429739	qz
2878	5059	154.24	224.388	22536.7	1.4548	648.551	0.68738	1	122.599	805.34	80.6921	169.438	1.219	0.672964	qz
2879	5060	185.332	402.868	49875.9	2.17376	1074.96	0.460032	1	203.207	1782.29	103.99	252.064	1.35817	0.542115	qz
2882	5068	137.807	286.096	27338.8	2.07606	707.453	0.481681	1	133.734	976.94	89.7925	186.619	1.20729	0.686079	qz
2884	5074	176.546	314.137	33878.6	1.77935	938.195	0.562003	1	177.353	1210.64	93.8141	207.744	1.43825	0.483424	qz
2887	5079	136.451	217.544	16292.5	1.5943	637.592	0.627234	1	120.528	582.207	97.5341	144.065	1.40946	0.503377	qz
2888	5080	101.671	145.304	9812.84	1.42916	414.797	0.699712	1	78.4116	350.658	128.09	111.805	1.18153	0.716329	qz
2896	5099	84.0838	159.085	8872.15	1.89199	403.76	0.528545	1	76.3251	317.043	89.125	106.311	1.20952	0.683553	qz
2901	5107	74.1411	169.352	8828.47	2.28419	434.503	0.437793	1	82.1367	315.482	90.0586	106.049	1.30483	0.58734	qz
2903	5111	60.4605	119.182	5727.36	1.97123	301.188	0.507297	1	56.9354	204.665	103.394	85.4166	1.12296	0.79299	qz
2906	5118	173.053	245.958	25331.8	1.42128	783.239	0.70359	1	148.06	905.222	30.4301	179.638	1.38857	0.518642	qz
2909	5121	91.5577	139.349	8320.25	1.52198	391.68	0.657041	1	74.0416	297.321	67.3801	102.952	1.21162	0.681183	qz
2913	5131	140.952	174.618	15835.4	1.23885	524.468	0.807199	1	99.1432	565.871	8.87937	142.03	1.17601	0.72307	qz
2914	5132	65.7464	122.898	5877.81	1.86927	334.631	0.534967	1	63.2573	210.041	178.47	86.5312	1.23158	0.659285	qz
2915	5133	88.4554	244.997	14505.9	2.76973	592.621	0.361046	1	112.027	518.364	91.272	135.937	1.38838	0.518778	qz
2917	5138	110.943	154.989	12676.8	1.39702	472.628	0.715809	1	89.3437	452.999	37.8314	127.078	1.18446	0.712785	qz
2918	5139	145.538	258.6	20074.6	1.77685	760.364	0.562795	1	143.736	717.356	74.2914	159.915	1.51427	0.436107	qz
2922	5143	197.195	300.051	38479.7	1.5216	803.596	0.657204	1	151.908	1375.06	126.291	221.402	1.15592	0.748421	qz
2923	5144	71.5844	107.895	5777.26	1.50725	291.166	0.663462	1	55.0409	206.448	78.6901	85.7879	1.0809	0.855911	qz
2924	5145	131.954	202.184	17629.2	1.53222	554.261	0.652646	1	104.775	629.971	138.716	149.858	1.17789	0.720763	qz
2926	5150	153.432	204.209	19648.9	1.33094	630.158	0.75135	1	119.123	702.146	89.9395	158.21	1.26849	0.621482	qz
2928	5152	174.775	278.745	29772.3	1.59488	794.051	0.627008	1	150.104	1063.9	113.89	194.747	1.29852	0.593068	qz
2930	5157	97.0964	163.846	9522.84	1.68745	438.361	0.59261	1	82.8659	340.295	62.1084	110.141	1.26752	0.622434	qz
2931	5158	104.974	231.308	17083.4	2.20347	573.19	0.453829	1	108.353	610.468	90.9765	147.52	1.23742	0.653081	qz
2934	5164	105.503	194.348	14672.9	1.84211	526.958	0.542855	1	99.614	524.331	91.3073	136.717	1.2275	0.663674	qz
2939	5173	79.703	126.942	8370.84	1.59268	347.452	0.627872	1	65.6809	299.128	89.7958	103.264	1.07156	0.870902	qz
2942	5185	361.474	448.448	93395	1.24061	1728.27	0.806055	1	326.706	3337.43	79.3803	344.927	1.59572	0.392724	qz
2945	5188	104.959	140.191	9361.89	1.33567	399.598	0.748688	1	75.5383	334.543	109.695	109.206	1.16532	0.736389	qz
2949	5201	146.549	213.253	20528.6	1.45517	599.071	0.687207	1	113.246	733.579	113.209	161.713	1.17979	0.718442	qz
2952	5204	143.184	259.191	24880.8	1.8102	680.988	0.552427	1	128.731	889.105	48.9637	178.032	1.21818	0.673869	qz
2957	5212	163.314	214.374	21919.2	1.31265	702.092	0.761817	1	132.721	783.275	158.962	167.101	1.33809	0.558504	qz
2960	5218	131.964	283.536	25538.6	2.14858	744.314	0.465423	1	140.702	912.612	79.5609	180.37	1.3142	0.578994	qz
2965	5224	98.4428	228.02	13659.3	2.31627	597.506	0.431729	1	112.95	488.11	88.2101	131.911	1.44256	0.480544	qz
2968	5227	99.2907	160.329	9926.08	1.61474	441.894	0.619294	1	83.5339	354.704	109.349	112.449	1.25151	0.638455	qz
2972	5233	210.394	261.054	34422.9	1.24079	804.899	0.805938	1	152.155	1230.09	71.3035	209.406	1.22412	0.66735	qz
2974	5239	109.421	249.198	18189.4	2.27743	619.917	0.439092	1	117.187	649.992	54.4272	152.221	1.29697	0.594486	qz
2976	5241	165.497	248.112	22860.8	1.4992	703.054	0.667024	1	132.903	816.922	108.769	170.652	1.31204	0.580903	qz
2978	5249	173.866	282.001	32266.6	1.62195	798.267	0.616544	1	150.901	1153.03	71.0921	202.741	1.25394	0.635984	qz
2979	5250	78.7684	216.077	11054.9	2.7432	538.59	0.364538	1	101.813	395.04	87.448	118.67	1.4454	0.478659	qz
2984	5261	141.941	239.499	20660.5	1.68732	645.003	0.592657	1	121.929	738.293	44.9093	162.232	1.26618	0.623744	qz
2987	5265	95.9324	153.088	10308.1	1.59579	427.044	0.62665	1	80.7267	368.356	164.04	114.592	1.18683	0.709942	qz
2988	5266	104.563	156.234	10900.2	1.49415	449.891	0.669275	1	85.0456	389.515	121.727	117.837	1.21589	0.676411	qz
2989	5267	93.132	118.65	8168.63	1.274	372.276	0.784931	1	70.3736	291.903	121.848	102.009	1.16224	0.7403	qz
2991	5275	106.64	202.633	14381.7	1.90017	532.971	0.526269	1	100.751	513.924	80.5377	135.354	1.25402	0.635907	qz
2992	5276	239.822	429.079	62683.6	1.78915	1301.82	0.558923	1	246.09	2239.97	100.62	282.58	1.46716	0.464562	qz
2997	5281	206.099	252.738	30070.3	1.22629	829.071	0.815465	1	156.724	1074.55	96.8509	195.72	1.34905	0.54947	qz
2999	5283	129.236	168.925	13896	1.30711	534.622	0.765046	1	101.063	496.567	20.8545	133.048	1.2797	0.61064	qz
3000	5284	115.08	206.501	14318.8	1.79442	614.033	0.557283	1	116.074	511.675	138.603	135.057	1.44792	0.476992	qz
3007	5299	105.872	185.447	15547.2	1.75161	504.329	0.570902	1	95.3364	555.572	90.0869	140.731	1.14128	0.767738	qz
3012	5308	129.739	187.114	16458	1.44224	538.591	0.693367	1	101.813	588.12	92.2876	144.795	1.18461	0.712605	qz
3013	5309	90.4119	152.928	9460.35	1.69145	429.73	0.591208	1	81.2344	338.062	91.3752	109.779	1.24666	0.643435	qz
3014	5310	94.7038	118.421	7693.77	1.25044	354.076	0.799722	1	66.933	274.934	127.301	98.9999	1.13902	0.770791	qz
3017	5316	80.3849	174.157	9384.88	2.16654	431.644	0.461565	1	81.5963	335.365	86.6335	109.34	1.25724	0.632655	qz
3019	5318	183.615	449.145	44418.2	2.44612	1158.79	0.40881	1	219.053	1587.26	94.7636	237.873	1.55142	0.415473	qz
3021	5320	79.0938	131.719	7870.36	1.66536	354.657	0.600472	1	67.043	281.244	26.0283	100.13	1.12802	0.785899	qz
3025	5329	199.844	328.693	35819.3	1.64475	1097.75	0.607995	1	207.515	1279.99	40.3141	213.611	1.63663	0.373334	qz
3031	5339	168.971	260.066	31625.9	1.53911	800.004	0.649725	1	151.229	1130.14	179.565	200.718	1.26933	0.620652	qz
3038	5356	211.444	481.847	49616.7	2.27885	1213.57	0.438819	1	229.408	1773.03	86.8043	251.408	1.53729	0.423145	qz
3040	5364	102.788	170.932	13743.5	1.66296	471.205	0.601338	1	89.0747	491.117	81.6175	132.316	1.13414	0.777438	qz
3044	5368	73.311	113.077	5798.4	1.54243	304.452	0.648329	1	57.5523	207.203	30.2219	85.9448	1.12816	0.785707	qz
3058	5394	124.469	169.487	11333.7	1.36168	520.182	0.734388	1	98.3331	405.004	55.0703	120.157	1.37872	0.526076	qz
3060	5396	340.937	515.455	104132	1.51188	1491.65	0.661429	1	281.975	3721.12	110.225	364.215	1.3043	0.587818	qz
3064	5404	108.234	117.286	8870.49	1.08364	378.771	0.922815	1	71.6013	316.983	37.5624	106.301	1.13477	0.776577	qz
3066	5412	98.1478	167.052	10366.9	1.70205	503.57	0.587528	1	95.1928	370.456	124.38	114.918	1.39554	0.513474	qz
3072	5425	117.712	204.299	15095.3	1.73558	573.719	0.576175	1	108.453	539.423	39.4961	138.671	1.3176	0.576013	qz
3073	5426	136.111	210.993	17466.4	1.55015	612.907	0.645099	1	115.861	624.155	114.523	149.165	1.30857	0.583988	qz
3078	5435	170.991	250.978	26095.6	1.46778	748.184	0.681299	1	141.434	932.516	56.4632	182.326	1.30686	0.585518	qz
3079	5436	140.601	247.076	23430.7	1.75728	651.008	0.569061	1	123.064	837.286	120.791	172.766	1.20005	0.694387	qz
3082	5442	80.0416	132.326	7326.15	1.65321	354.789	0.604883	1	67.068	261.797	105.719	96.6058	1.1696	0.731011	qz
3084	5444	183.526	291.226	28537.2	1.58684	937.428	0.630184	1	177.208	1019.77	104.003	190.665	1.5658	0.407874	qz
3090	5450	81.2829	112.418	7944.24	1.38304	344.732	0.723044	1	65.1668	283.884	86.1859	100.598	1.09134	0.839611	qz
3091	5451	96.7768	133.536	8601.51	1.37984	391.343	0.724723	1	73.9779	307.371	76.7595	104.677	1.19063	0.705421	qz
3093	5456	70.8994	201.65	11554.5	2.84417	501.034	0.351596	1	94.7135	412.895	98.1389	121.322	1.31522	0.578103	qz
3099	5466	93.7277	180.668	10736.4	1.92758	458.359	0.518785	1	86.6464	383.659	96.337	116.948	1.2482	0.641852	qz
3100	5467	109.18	132.318	10178.2	1.21193	408.141	0.825129	1	77.1533	363.712	86.3481	113.867	1.14151	0.767429	qz
3101	5468	136.468	204.269	18646.9	1.49683	637.548	0.668079	1	120.519	666.341	37.0417	154.124	1.31739	0.576198	qz
3102	5473	256.311	278.818	44343.1	1.08781	1086.59	0.919278	1	205.405	1584.58	17.8189	237.672	1.456	0.471716	qz
3103	5474	167.654	312.983	28727.4	1.86684	839.264	0.535665	1	158.651	1026.56	99.0401	191.299	1.39719	0.512257	qz
3104	5475	195.689	395.214	47883.1	2.0196	1103.84	0.495148	1	208.666	1711.08	53.5005	246.977	1.42338	0.493578	qz
3106	5477	265.485	488.152	70103.3	1.83872	1607.27	0.543857	1	303.832	2505.11	91.8779	298.837	1.71287	0.340839	qz
3108	5479	405.2	916.815	214149	2.26262	2634.4	0.441965	1	497.996	7652.53	87.3263	522.304	1.60631	0.387563	qz
3110	5484	121.915	190.44	16719.1	1.56207	572.618	0.640176	1	108.245	597.449	0	145.939	1.24958	0.640431	qz
3121	5501	69.1325	111.956	5883.78	1.61945	295.466	0.617494	1	55.8538	210.254	1.81135	86.5752	1.08689	0.846506	qz
3122	5502	85.8416	128.307	7835.89	1.4947	361.786	0.669032	1	68.3906	280.012	62.3568	99.9101	1.15322	0.751924	qz
3124	5508	96.9571	156.962	8625.43	1.61888	464.867	0.617712	1	87.8765	308.226	74.5626	104.823	1.41235	0.501318	qz
3126	5510	75.5152	132.221	7570.67	1.75092	356.67	0.571129	1	67.4233	270.535	38.0726	98.2047	1.15666	0.747467	qz
3127	5511	58.4703	173.755	6770.48	2.97168	422.929	0.33651	1	79.9487	241.94	90.0986	92.8699	1.45032	0.475417	qz
3128	5512	123.906	160.671	12446.3	1.29672	510.685	0.771177	1	96.5377	444.762	152.382	125.917	1.29163	0.59941	qz
3130	5516	140.967	251.581	23601.2	1.78468	743.078	0.560324	1	140.468	843.379	98.4498	173.393	1.36481	0.536853	qz
3137	5527	126.546	186.29	14570.4	1.47211	572.896	0.679296	1	108.298	520.666	20.2799	136.239	1.3392	0.557582	qz
3139	5529	105.623	192.323	15309	1.82084	530.566	0.549198	1	100.296	547.062	8.94902	139.649	1.20996	0.683059	qz
3142	5534	111.778	133.636	9450.98	1.19555	458.982	0.836435	1	86.7641	337.727	127.481	109.724	1.33218	0.563476	qz
3144	5536	189.788	423.905	40281.5	2.23357	1278.11	0.447714	1	241.609	1439.44	164.951	226.526	1.79689	0.309711	qz
3145	5537	148.743	339.124	25186.4	2.27994	863.171	0.438608	1	163.17	900.026	132.274	179.122	1.53468	0.424583	qz
3146	5538	112.672	246.811	17644.9	2.19051	644.908	0.456514	1	121.911	630.533	135.464	149.925	1.36991	0.53286	qz
3161	5571	64.8356	133.478	6377.61	2.05872	328.484	0.48574	1	62.0954	227.901	112.577	90.1351	1.16062	0.742366	qz
3164	5577	117.296	270.257	17567.6	2.30406	689.929	0.434017	1	130.421	627.771	85.2364	149.597	1.46877	0.463547	qz
3166	5579	96.2613	267.839	17923.4	2.78242	685.828	0.359399	1	129.646	640.484	101.035	151.104	1.44547	0.478607	qz
3170	5589	92.3033	155.197	10375	1.68138	425.129	0.594749	1	80.3647	370.746	129.351	114.963	1.17769	0.721	qz
3172	5591	97.4923	235.819	16435.2	2.41884	598.225	0.413421	1	113.086	587.305	68.6294	144.695	1.31669	0.576813	qz
3173	5592	121.357	291.403	22099.3	2.4012	817.359	0.416458	1	154.51	789.708	118.594	167.785	1.55142	0.415472	qz
3183	5608	114.228	180.036	13932.5	1.57611	513.901	0.634475	1	97.1458	497.872	90	133.223	1.22849	0.662613	qz
3184	5609	89.5687	150.811	8744.27	1.68375	388.371	0.593912	1	73.4161	312.473	113.155	105.542	1.1719	0.728147	qz
3189	5621	83.9452	115.936	7607	1.38109	365.977	0.724068	1	69.1827	271.833	122.473	98.44	1.184	0.71334	qz
3193	5633	105.841	143.115	9737.68	1.35216	452.078	0.739555	1	85.459	347.972	90.4883	111.376	1.29268	0.598436	qz
3195	5635	151.039	177.96	18791.1	1.17824	564.828	0.848726	1	106.773	671.493	120.554	154.718	1.16264	0.739793	qz
3197	5641	136.168	285.126	23897.6	2.09392	788.674	0.477573	1	149.088	853.97	84.5597	174.479	1.43955	0.482556	qz
3212	5661	103.778	270.487	16227.1	2.60641	650.61	0.38367	1	122.989	579.869	91.7966	143.776	1.44114	0.481492	qz
3222	5674	121.049	176.296	16061.8	1.4564	500.274	0.686623	1	94.5697	573.961	174.63	143.042	1.11382	0.806061	qz
3223	5675	121.548	229.199	19342.7	1.88567	619.714	0.530315	1	117.148	691.204	101.768	156.973	1.2573	0.632593	qz
3227	5679	150.267	498.606	51316.2	3.31814	1191.51	0.301374	1	225.239	1833.76	96.1976	255.677	1.48415	0.45399	qz
3234	5690	154.155	311.558	31096.8	2.02107	780.815	0.494788	1	147.602	1111.23	123.563	199.032	1.24938	0.640632	qz
3235	5694	76.3563	102.469	5722.66	1.34199	311.575	0.745163	1	58.8988	204.497	23.1686	85.3816	1.16217	0.740396	qz
3236	5695	113.513	255.649	17016	2.25216	647.644	0.444018	1	122.428	608.059	117.957	147.229	1.40092	0.509535	qz
3237	5696	96.1628	263.106	18312.5	2.73604	633.28	0.365491	1	119.713	654.391	100.111	152.735	1.32046	0.573518	qz
3241	5706	75.09	115.826	6360.35	1.54249	318.456	0.648302	1	60.1996	227.284	95.5941	90.0131	1.12671	0.787721	qz
3243	5708	121.797	196.237	15366.8	1.61118	546.677	0.620664	1	103.342	549.124	90.231	139.912	1.24436	0.645817	qz
3246	5721	85.1579	115.437	7720.08	1.35556	343.76	0.737701	1	64.9831	275.874	82.3296	99.169	1.10395	0.82054	qz
3255	5735	93.6852	138.604	9126.75	1.47947	384.385	0.675918	1	72.6627	326.141	56.5787	107.826	1.13531	0.775839	qz
3260	5751	204.62	501.578	62588.4	2.45127	1311.7	0.407952	1	247.958	2236.57	94.0242	282.366	1.47942	0.456895	qz
3261	5752	115.643	158.73	12066.2	1.37258	450.882	0.728553	1	85.233	431.179	65.1824	123.979	1.1582	0.745474	qz
3262	5753	146.577	344.818	33296.4	2.35248	914.775	0.425084	1	172.925	1189.83	121.637	205.951	1.41456	0.499757	qz
3279	5778	111.194	127.019	8735.14	1.14233	426.567	0.875406	1	80.6365	312.147	0.162471	105.487	1.28783	0.602955	qz
3282	5783	195.2	626.07	80587.5	3.20732	1547.41	0.311787	1	292.516	2879.76	96.0396	320.405	1.53807	0.422715	qz
3286	5787	374.825	762.54	169635	2.03439	2209.26	0.491547	1	417.63	6061.82	70.8384	464.86	1.51354	0.436525	qz
3290	5796	135.075	297.065	27964.5	2.19926	766.438	0.454698	1	144.884	999.3	91.7347	188.742	1.29324	0.597919	qz
3291	5797	96.3929	199.451	12863.9	2.06915	510.949	0.48329	1	96.5877	459.687	104.744	128.012	1.27115	0.618882	qz
3297	5810	142.289	226.995	23839.6	1.59531	686.833	0.626839	1	129.836	851.897	63.9603	174.267	1.25518	0.634724	qz
3311	5839	94.4073	118.499	6241.78	1.25519	361.536	0.796693	1	68.3433	223.047	148.505	89.1701	1.29123	0.599784	qz
3317	5850	140.017	217.441	16378	1.55296	665.533	0.643931	1	125.81	585.26	176.752	144.443	1.46739	0.464419	qz
3338	5882	165.509	216.829	21144.6	1.31008	612.64	0.763314	1	115.811	755.592	75.9638	164.121	1.18881	0.707584	qz
3349	5894	88.4789	237.057	14973.3	2.67924	594.804	0.37324	1	112.439	535.064	99.4623	138.11	1.37158	0.531568	qz
3371	5926	91.3406	207.497	13250.9	2.27169	525.375	0.440202	1	99.3147	473.516	86.7508	129.924	1.28781	0.602972	qz
3382	5943	93.3932	174.923	11081.6	1.87297	478.801	0.53391	1	90.5107	395.995	77.6156	118.814	1.28339	0.607128	qz
3402	5974	114.599	160.479	11355.6	1.40035	447.907	0.714105	1	84.6706	405.787	60.6856	120.274	1.18601	0.710923	qz
3403	5975	136.814	162.819	13495.4	1.19008	536.598	0.840278	1	101.436	482.251	4.08562	131.117	1.30335	0.588676	qz
3419	6009	74.2944	121.034	6209.4	1.62911	318.505	0.613831	1	60.209	221.89	144.671	88.9385	1.14051	0.768786	qz
3429	6026	116.099	164.601	13600.6	1.41776	461.746	0.705336	1	87.2865	486.011	66.7357	131.627	1.1172	0.801201	qz
3449	6071	171.629	209.494	23271	1.22062	691.121	0.819255	1	130.647	831.58	143.874	172.176	1.27835	0.611924	qz
3453	6080	112.968	157.225	10164.3	1.39176	465.4	0.718512	1	87.9774	363.215	38.6598	113.79	1.30255	0.589402	qz
3476	6119	118.352	239.606	16455	2.02453	638.64	0.493942	1	120.726	588.014	97.869	144.782	1.40479	0.506729	qz
3489	6146	83.7266	202.974	11423.2	2.42424	521.484	0.4125	1	98.5792	408.204	87.7094	120.631	1.37674	0.52759	qz
3496	6158	68.719	113.197	6417.44	1.64725	308.455	0.607073	1	58.3091	229.324	85.6013	90.4162	1.08647	0.847165	qz
3507	6187	96.7461	123.87	9196.56	1.28036	376.098	0.781032	1	71.096	328.635	80.2053	108.238	1.10661	0.816608	qz
3512	6198	184.241	272.015	29719.1	1.4764	840.142	0.677321	1	158.817	1062	112.284	194.573	1.37512	0.528836	qz
3574	6313	124.898	408.961	35980.9	3.27435	1045.44	0.305404	1	197.625	1285.76	102.995	214.092	1.55513	0.41349	qz
3589	6338	93.9888	220.936	13725.2	2.35066	536.772	0.425412	1	101.469	490.463	81.9681	132.228	1.29282	0.598311	qz
3599	6352	124.162	177.085	14656.9	1.42624	521.591	0.701142	1	98.5995	523.759	81.4692	136.643	1.21567	0.676663	qz
3618	6384	138.726	177.033	12450.3	1.27614	585.246	0.783616	1	110.633	444.906	133.484	125.938	1.47997	0.456554	qz
3627	6400	97.4368	161.24	10890.2	1.65481	459.53	0.604298	1	86.8677	389.158	79.685	117.783	1.24251	0.647738	qz
3628	6401	77.7956	132.765	7979.33	1.70659	351.673	0.585964	1	66.4789	285.138	75.2167	100.82	1.11087	0.810359	qz
3669	6475	90.6574	188.622	10563.2	2.0806	490.77	0.48063	1	92.7731	377.47	40.6013	116.001	1.34737	0.550843	qz
3676	6490	154.903	298.163	26104.9	1.92484	878.695	0.519525	1	166.105	932.849	129.171	182.359	1.53455	0.424655	qz
3687	6514	88.006	161.075	8740.53	1.83027	414.258	0.546367	1	78.3096	312.339	98.0696	105.52	1.25028	0.639715	qz
3696	6527	89.7664	219.16	14724.3	2.44145	547.953	0.409593	1	103.583	526.168	88.5431	136.957	1.27418	0.615941	qz
3704	6541	158.644	260.953	27797	1.64489	723.523	0.607943	1	136.772	993.312	74.6616	188.176	1.2245	0.666932	qz
3718	6571	110.167	126.891	10080.9	1.15181	389.717	0.868197	1	73.6705	360.236	84.8496	113.322	1.09523	0.83366	qz
3727	6593	94.475	138.967	9936.03	1.47094	396.451	0.679839	1	74.9435	355.06	78.7526	112.505	1.12225	0.794006	qz
3738	6614	90.6177	105.242	6286.27	1.16138	323.495	0.861042	1	61.1522	224.637	56.4316	89.4874	1.15127	0.754479	qz
3756	6652	75.3946	145.699	7979.15	1.93248	390.91	0.517469	1	73.8961	285.132	96.7646	100.819	1.23482	0.655831	qz
3770	6671	90.3724	142.681	8643.53	1.57881	401.296	0.633386	1	75.8593	308.873	106.362	104.933	1.21794	0.674142	qz
3773	6674	149.715	368.785	35387.3	2.46325	972.572	0.405968	1	183.851	1264.55	93.3597	212.319	1.45883	0.469887	qz
3777	6684	96.4357	157.183	10545.4	1.62992	416.87	0.613526	1	78.8034	376.835	140.34	115.903	1.14545	0.762168	qz
3798	6720	119.672	186.916	15917.6	1.5619	528.386	0.640245	1	99.8838	568.807	74.7049	142.398	1.18173	0.716084	qz
3799	6721	66.9599	124.384	5593.1	1.85759	333.585	0.538333	1	63.0595	199.867	129.192	84.4095	1.25859	0.63129	qz
3808	6731	95.3311	111.364	7410.4	1.16818	347.201	0.856034	1	65.6335	264.807	89.8961	97.1596	1.13806	0.772091	qz
3815	6746	131.827	191.735	13494.2	1.45444	542.884	0.68755	1	102.625	482.208	156.446	131.111	1.31868	0.57507	qz
3816	6747	160.816	241.479	23450.8	1.50158	657.965	0.665963	1	124.379	838.003	53.1301	172.84	1.21235	0.680363	qz
3831	6777	100.681	172.608	11753.8	1.71441	474.074	0.583293	1	89.617	420.015	74.3334	122.364	1.23385	0.656862	qz
3866	6844	84.8775	148.274	7833.07	1.74692	404.33	0.572435	1	76.4328	279.911	90	99.8921	1.28907	0.601797	qz
3870	6852	125.006	260.049	25227.7	2.08028	657.19	0.480703	1	124.232	901.502	84.5597	179.269	1.1675	0.733645	qz
3888	6891	138.157	241.525	20476.1	1.74819	703.716	0.572019	1	133.028	731.704	77.2756	161.506	1.38765	0.519328	qz
3904	6922	95.3959	151.446	10844.7	1.58755	432.025	0.6299	1	81.6683	387.53	94.5759	117.537	1.17059	0.729773	qz
3924	6959	230.045	357.579	54663.8	1.55439	1074.06	0.643339	1	203.035	1953.39	130.018	263.885	1.29623	0.595164	qz
3938	6980	193.866	274.068	28319	1.4137	813.42	0.707366	1	153.766	1011.97	177.382	189.934	1.3639	0.537572	qz
4007	7109	154.171	184.175	21580.2	1.19461	603.093	0.837091	1	114.006	771.159	140.071	165.803	1.15841	0.745206	qz
4011	7119	104.759	162.03	11225.1	1.5467	478.637	0.646539	1	90.4795	401.125	50.0339	119.581	1.27472	0.615416	qz
4029	7146	62.5005	154.312	6397.63	2.46897	380.581	0.405027	1	71.9436	228.616	87.8005	90.2765	1.34259	0.55477	qz
4047	7172	221.699	352.892	44681.9	1.59176	1189.67	0.628234	1	224.89	1596.69	148.891	238.578	1.58805	0.396525	qz
4100	7249	96.1422	271.924	18717.2	2.82835	632.236	0.353563	1	119.515	668.851	69.0133	154.414	1.30396	0.588128	qz
4118	7285	129.104	135.21	13102.6	1.04729	470.823	0.954842	1	89.0025	468.215	109.654	129.194	1.16061	0.742387	qz
4136	7317	130.967	152.516	12850.3	1.16454	487.029	0.858709	1	92.0661	459.2	144.559	127.944	1.21228	0.680443	qz
4152	7344	116.57	360.001	28697	3.08827	838.062	0.323806	1	158.424	1025.48	90.0983	191.198	1.39593	0.513185	qz
4165	7369	150.096	252.639	23079.9	1.68319	710.521	0.594111	1	134.314	824.75	91.1188	171.468	1.31967	0.574208	qz
4195	7423	145.881	228.443	25627	1.56596	637.453	0.638587	1	120.501	915.769	70.3323	180.682	1.12358	0.79212	qz
4238	7500	128.773	201.676	15001.2	1.56614	563.06	0.638512	1	106.439	536.062	136.72	138.238	1.29717	0.594301	qz
4263	7550	72.3977	191.543	9244.89	2.6457	468.466	0.377972	1	88.5568	330.362	63.2799	108.522	1.37478	0.529098	qz
4275	7577	96.781	143.324	10002.7	1.48091	396.396	0.67526	1	74.9331	357.442	106.462	112.882	1.11835	0.799554	qz
4277	7580	100.492	126.459	7910.58	1.25839	432.922	0.794667	1	81.8379	282.681	5.94201	100.385	1.37344	0.530124	qz
4282	7585	160.377	351.712	37940.4	2.19303	994.406	0.45599	1	187.978	1355.79	98.7991	219.845	1.44051	0.481909	qz
4299	7618	58.6313	159.728	6851.62	2.72428	400.17	0.367069	1	75.6465	244.84	90.0268	93.4248	1.36412	0.537396	qz
4311	7642	74.684	121.603	7043.63	1.62824	335.846	0.614162	1	63.487	251.701	86.9311	94.7247	1.12914	0.784343	qz
4316	7649	108.789	216.925	12581.7	1.99399	610.226	0.501507	1	115.355	449.603	111.038	126.601	1.53506	0.424375	qz
4317	7650	173.961	254.38	24030.9	1.46228	751.521	0.683865	1	142.064	858.734	95.9452	174.965	1.36792	0.534413	qz
4328	7664	138.076	230.911	19075.5	1.67234	610.023	0.597963	1	115.316	681.656	122.471	155.885	1.24627	0.643833	qz
4331	7669	109.256	195.393	12236.3	1.7884	504.803	0.559159	1	95.4258	437.258	142.595	124.85	1.28766	0.603108	qz
4344	7687	121.008	150.328	12513.2	1.2423	491.628	0.804962	1	92.9353	447.155	54.9276	126.255	1.2401	0.650259	qz
4346	7694	158.815	259.602	21839.3	1.63462	774.002	0.611763	1	146.314	780.42	70.2109	166.796	1.47784	0.457873	qz
4368	7741	195.496	522.347	61249.4	2.67191	1286.24	0.374265	1	243.146	2188.72	89.4892	279.329	1.46649	0.464991	qz
4386	7776	252.036	420.25	49200.9	1.66742	1313.65	0.599728	1	248.328	1758.17	51.8996	250.352	1.67109	0.358098	qz
4393	7795	83.7026	107.855	6626.88	1.28855	306.111	0.776068	1	57.866	236.809	161.461	91.8798	1.06103	0.888263	qz
4396	7808	109.716	240.274	18086.6	2.18998	623.645	0.456626	1	117.891	646.316	109.906	151.79	1.30847	0.584078	qz
4407	7825	89.1351	92.2099	6341.61	1.0345	306.444	0.966655	1	57.929	226.615	15.3793	89.8804	1.08582	0.848176	qz
4417	7839	97.9581	277.597	21039.5	2.83383	646.41	0.352879	1	122.195	751.839	82.8139	163.713	1.25746	0.632427	qz
4418	7840	127.239	151.556	12961.9	1.19111	453.098	0.839551	1	85.6518	463.186	118.349	128.499	1.12296	0.792998	qz
4420	7848	127.734	164.885	13703	1.29085	479.012	0.774681	1	90.5504	489.671	106.343	132.121	1.15463	0.75009	qz
4426	7857	185.556	541.606	53374.2	2.91883	1409.96	0.342603	1	266.533	1907.3	62.9279	260.754	1.72205	0.337214	qz
4432	7878	85.6397	110.561	6715.83	1.29101	340.53	0.774589	1	64.3723	239.987	127.158	92.4943	1.17249	0.72741	qz
4439	7885	116.881	261.09	15374.6	2.23381	666.908	0.447666	1	126.07	549.405	119.578	139.948	1.51764	0.434171	qz
4444	7893	57.9129	135.492	5524.47	2.33958	342.921	0.427428	1	64.8244	197.415	46.9816	83.8901	1.30183	0.590055	qz
4448	7902	177.997	410.087	42898.2	2.30389	1075.77	0.434048	1	203.36	1532.95	82.8253	233.768	1.46557	0.465573	qz
4455	7911	70.8992	265.794	12425.3	3.74889	612.939	0.266745	1	115.868	444.012	94.9154	125.811	1.55156	0.415395	qz
4456	7913	133.12	153.151	14048.1	1.15047	491.698	0.869207	1	92.9486	502.004	42.3222	133.775	1.17056	0.729811	qz
4457	7914	100.512	157.383	11504.2	1.56582	446.532	0.638642	1	84.4106	411.098	155.208	121.058	1.17471	0.724672	qz
4463	7920	102.261	174.542	11111.4	1.70682	464.017	0.585884	1	87.7159	397.063	107.265	118.974	1.24209	0.648175	qz
4464	7929	97.7318	150.434	8142.83	1.53925	412.404	0.649667	1	77.9591	290.98	78.7432	101.848	1.28956	0.601339	qz
4469	7934	307.916	612.053	108619	1.98773	1667.75	0.503086	1	315.264	3881.44	79.69	371.978	1.42785	0.490492	qz
4470	7935	62.8244	127.136	5936.21	2.02368	320.313	0.49415	1	60.5507	212.128	108.435	86.9601	1.17307	0.72669	qz
4479	7953	114.024	273.216	17757.2	2.39612	640.651	0.417341	1	121.106	634.546	119.659	150.402	1.35656	0.543402	qz
4492	7976	91.2534	137.251	8763.19	1.50407	384.613	0.664865	1	72.7056	313.149	102.188	105.657	1.1593	0.744055	qz
4494	7984	194.856	261.417	25606.4	1.34159	780.765	0.745382	1	147.593	915.033	94.0856	180.609	1.37674	0.527591	qz
4503	8000	86.8756	138.289	7448.66	1.59181	348.588	0.628216	1	65.8956	266.175	49.3295	97.4102	1.13967	0.769916	qz
4511	8016	90.5611	163.535	8428.17	1.8058	408.77	0.553771	1	77.2722	301.177	109.102	103.617	1.25637	0.633527	qz
4528	8048	107.765	125.002	9467.85	1.15995	391.279	0.862104	1	73.9659	338.33	78.21	109.822	1.13466	0.776725	qz
4531	8059	92.2539	119.745	7942.25	1.298	349.549	0.770419	1	66.0774	283.813	166.303	100.586	1.10673	0.816424	qz
4549	8092	227.053	373.393	45551.9	1.64452	1189.79	0.608081	1	224.914	1627.78	75.2299	240.89	1.57298	0.404159	qz
4553	8102	71.7224	154.961	8910.16	2.16057	393.929	0.462841	1	74.4667	318.401	85.7004	106.539	1.17755	0.721174	qz
4557	8115	124.397	195.026	13150.1	1.56778	534.561	0.637846	1	101.051	469.913	169.734	129.428	1.31534	0.577995	qz
4562	8125	84.1783	151.202	9873.85	1.79621	402.264	0.556727	1	76.0423	352.838	76.5967	112.152	1.14228	0.766398	qz
4579	8156	70.5437	127.765	6797.56	1.81115	335.681	0.552135	1	63.4558	242.908	106.413	93.0554	1.14883	0.757686	qz
4581	8158	114.447	203.413	14837.1	1.77736	544.108	0.562634	1	102.856	530.197	75.0254	137.48	1.26042	0.629461	qz
4585	8166	65.3483	118.198	5852.1	1.80874	302.485	0.55287	1	57.1804	209.122	93.4307	86.3418	1.11571	0.803332	qz
4597	8194	383.946	555.139	91378	1.44587	1763.32	0.691623	1	333.331	3265.35	103.799	341.182	1.64595	0.369121	qz
4600	8202	104.763	216.138	14931	2.06311	546.737	0.484704	1	103.353	533.552	86.4237	137.914	1.26252	0.627366	qz
4609	8218	93.7228	100.886	6694.07	1.07643	334.993	0.929	1	63.3257	239.21	0	92.3443	1.1553	0.749218	qz
4611	8220	100.105	198.598	12279.9	1.9839	499.831	0.504058	1	94.4859	438.817	72.7823	125.073	1.27271	0.617361	qz
4626	8248	76.4054	134.584	8261.95	1.76144	370.47	0.567716	1	70.0321	295.237	101.927	102.59	1.15005	0.756077	qz
4628	8255	83.3459	114.893	6631.81	1.3785	307.167	0.725424	1	58.0656	236.985	111.991	91.9139	1.0643	0.882821	qz
4634	8269	121.502	231.623	19135.9	1.90633	647.497	0.524567	1	122.4	683.814	81.3042	156.131	1.32074	0.573276	qz
4643	8284	110.166	183.61	12924.2	1.66667	483.551	0.6	1	91.4085	461.842	139.399	128.312	1.20018	0.69424	qz
4649	8295	76.7099	113.495	5642.98	1.47954	295.716	0.675888	1	55.9009	201.649	73.3213	84.7851	1.11077	0.810492	qz
4650	8296	60.0417	134.089	6067.54	2.23327	335.327	0.447774	1	63.3889	216.821	73.7909	87.9167	1.2147	0.677743	qz
4652	8307	108.918	241.729	15171.9	2.21937	657.527	0.450578	1	124.296	542.16	75.9417	139.022	1.50626	0.440759	qz
4657	8315	89.5218	134.068	7185.88	1.4976	377.244	0.667733	1	71.3126	256.784	113.199	95.6765	1.2557	0.634199	qz
4661	8323	72.4738	136.752	7251.95	1.88692	369.562	0.529963	1	69.8604	259.145	111.038	96.1153	1.22452	0.666915	qz
4676	8350	114.271	211.526	14391.5	1.8511	594.78	0.540219	1	112.435	514.273	127.329	135.4	1.39897	0.510955	qz
4688	8377	93.628	118.011	6825.66	1.26043	328.52	0.793381	1	62.1021	243.912	22.6464	93.2476	1.122	0.794348	qz
4702	8404	106.223	156.487	11892.8	1.4732	445.552	0.678795	1	84.2254	424.983	157.254	123.085	1.15282	0.752445	qz
4703	8405	92.2226	152.199	8204.14	1.65035	413.179	0.605934	1	78.1056	293.171	80.5072	102.231	1.28714	0.603596	qz
4706	8409	65.3484	116.607	5776.46	1.78438	293.298	0.560418	1	55.4439	206.419	40.9872	85.782	1.08889	0.843397	qz
4708	8411	98.6539	170.913	12730.2	1.73245	446.336	0.577218	1	84.3735	454.907	78.5292	127.345	1.11622	0.802602	qz
4717	8425	63.865	133.948	5992.64	2.09736	345.1	0.476791	1	65.2363	214.144	83.4149	87.3724	1.25789	0.632001	qz
4718	8426	156.285	235.616	22181.7	1.5076	654.845	0.663307	1	123.789	792.654	83.9606	168.098	1.24064	0.649692	qz
4719	8427	126.983	177.857	16166.3	1.40064	524.924	0.71396	1	99.2294	577.695	97.9811	143.506	1.16492	0.736898	qz
4720	8428	107.979	186.112	13069.5	1.7236	507.991	0.580181	1	96.0286	467.035	112.885	129.031	1.25381	0.636118	qz
4721	8429	183.289	228.224	26324.8	1.24516	673.283	0.80311	1	127.275	940.704	45	183.125	1.1709	0.729388	qz
4725	8440	73.2721	119.504	6056.6	1.63096	334.036	0.613137	1	63.1449	216.43	129.646	87.8375	1.21111	0.68176	qz
4726	8441	117.787	210.905	14972.1	1.79056	553.646	0.558485	1	104.659	535.022	76.6853	138.104	1.27672	0.61349	qz
4727	8442	69.8945	168.492	8485.56	2.41066	407.66	0.414824	1	77.0623	303.228	69.7176	103.969	1.24871	0.64132	qz
4731	8451	283.935	519.335	94356.2	1.82906	1557.74	0.546729	1	294.47	3371.78	49.5415	346.697	1.43092	0.488391	qz
4732	8452	113.771	164.994	12356.6	1.45023	473.383	0.689545	1	89.4865	441.559	2.68812	125.463	1.20162	0.69257	qz
4734	8454	83.4506	165.534	8869.14	1.98362	456.677	0.504129	1	86.3284	316.935	91.3232	106.293	1.36828	0.534137	qz
4735	8455	113.506	148.682	11234	1.3099	439.491	0.763414	1	83.0795	401.443	110.7	119.628	1.17	0.730509	qz
4737	8457	175.764	265.735	25883.1	1.51188	777.164	0.661427	1	146.912	924.922	141.633	181.582	1.36304	0.538246	qz
4746	8475	76.3003	111.508	5841.81	1.46144	329.541	0.684257	1	62.2951	208.755	4.97233	86.2658	1.21658	0.675643	qz
4747	8476	89.0625	112.513	6786.19	1.26331	317.891	0.791573	1	60.0928	242.502	125.621	92.9776	1.08886	0.84345	qz
4748	8477	101.197	235.153	16450.4	2.32372	594.788	0.430344	1	112.436	587.85	77.8872	144.762	1.30851	0.584041	qz
4749	8478	77.4901	103.676	6395.25	1.33793	302.033	0.747424	1	57.0952	228.531	94.4972	90.2597	1.06569	0.880515	qz
4752	8486	69.4412	123.755	6272.57	1.78216	322.068	0.561117	1	60.8824	224.147	99.691	89.3898	1.14744	0.759521	qz
4763	8503	76.5958	96.9046	6127.63	1.26514	286.253	0.790425	1	54.1122	218.968	5.85649	88.351	1.03183	0.939249	qz
4765	8507	284.578	470.249	83865.7	1.65244	1460.67	0.605164	1	276.12	2996.91	96.9474	326.857	1.4232	0.493706	qz
4766	8508	134.586	155.912	14419.5	1.15846	498.274	0.863214	1	94.1917	515.275	82.4054	135.532	1.17084	0.729464	qz
4768	8511	89.0278	128.103	7639.39	1.43891	362.493	0.69497	1	68.5242	272.99	25.2011	98.6494	1.17024	0.730213	qz
4771	8514	63.5525	148.2	6756.47	2.33193	358.497	0.428829	1	67.7687	241.44	90.1246	92.7737	1.23064	0.660298	qz
4772	8515	193.517	418.958	56018.1	2.16497	1162.08	0.4619	1	219.676	2001.78	106.097	267.134	1.38541	0.521006	qz
4777	8525	80.3822	128.546	7545.77	1.59918	348.493	0.625319	1	65.8776	269.645	126.87	98.0431	1.132	0.78038	qz
4781	8532	77.8673	132.16	7233.76	1.69725	378.462	0.589188	1	71.5429	258.495	89.4802	95.9947	1.25558	0.634322	qz
4782	8533	174.247	330.834	36172.5	1.89865	878.117	0.526691	1	165.996	1292.61	99.8658	214.662	1.30277	0.589201	qz
4792	8550	84.8644	85.0494	5855.03	1.00218	281.234	0.997825	1	53.1633	209.227	89.9639	86.3634	1.03707	0.929788	qz
4793	8551	92.5149	236.803	16656.8	2.55962	562.191	0.390683	1	106.274	595.222	76.7898	145.667	1.22912	0.661931	qz
4797	8558	178.213	252.461	28416.3	1.41663	705.097	0.705902	1	133.289	1015.44	85.7966	190.261	1.18024	0.717892	qz
4800	8561	209.644	252.679	27909.3	1.20527	890.843	0.829687	1	168.401	997.328	53.2584	188.556	1.50464	0.44171	qz
4801	8562	109.256	182.385	11378	1.66933	498.106	0.599041	1	94.16	406.589	145.186	120.392	1.31763	0.575987	qz
4804	8566	152.641	198.115	21308.2	1.29791	606.585	0.770469	1	114.666	761.44	99.4623	164.755	1.17253	0.727367	qz
4806	8571	77.8372	138.556	7084.04	1.78007	375.677	0.561776	1	71.0165	253.145	44.3128	94.9961	1.25945	0.630436	qz
4807	8572	129.808	152.751	12219.1	1.17675	509.968	0.849801	1	96.4022	436.644	38.9425	124.763	1.30175	0.590124	qz
4808	8573	111.342	188.037	11727.3	1.68883	530.505	0.592127	1	100.284	419.071	54.3623	122.226	1.38228	0.523371	qz
4812	8583	238.534	292.835	46104.3	1.22764	927.44	0.814569	1	175.319	1647.52	74.0546	242.346	1.21877	0.673225	qz
4813	8584	87.1507	147.727	9467.98	1.69508	391.432	0.589943	1	73.9947	338.334	140.194	109.823	1.1351	0.77613	qz
4820	8602	103.615	167.258	12441.2	1.61422	455.081	0.619493	1	86.0267	444.58	98.0559	125.891	1.15123	0.754525	qz
4824	8609	69.858	130.388	6363.93	1.86647	347.566	0.53577	1	65.7025	227.412	97.6846	90.0384	1.22936	0.661668	qz
4827	8612	125.259	252.843	22865.3	2.01856	675.014	0.495402	1	127.602	817.081	143.167	170.668	1.25959	0.630289	qz
4828	8613	191.899	454.177	44266.4	2.36675	1176.55	0.42252	1	222.41	1581.84	91.0821	237.466	1.57789	0.401647	qz
4834	8621	98.4121	156.001	11158.5	1.58518	472.189	0.630841	1	89.2608	398.745	136.52	119.225	1.2613	0.628584	qz
4835	8622	118.847	200.496	14209.8	1.68702	585.59	0.592762	1	110.698	507.78	59.0397	134.542	1.38614	0.520461	qz
4836	8623	99.3619	185.655	12972	1.86847	512.482	0.535196	1	96.8775	463.549	93.9452	128.549	1.26964	0.620354	qz
4838	8625	98.2448	195.086	14021.6	1.98571	500.114	0.503598	1	94.5396	501.057	77.4712	133.649	1.19172	0.704125	qz
4840	8627	98.4577	137.889	9384.44	1.40049	386.044	0.714036	1	72.9762	335.349	151.252	109.338	1.12444	0.790904	qz
4846	8637	158.757	232.793	21878.3	1.46634	714.392	0.681969	1	135.046	781.813	89.9109	166.945	1.36281	0.538431	qz
4850	8642	187.401	384.812	33494.6	2.05342	995.869	0.486992	1	188.255	1196.91	108.137	206.563	1.53539	0.424189	qz
4854	8652	73.8314	141.876	7329.35	1.92162	351.745	0.520394	1	66.4925	261.911	71.9228	96.6269	1.15931	0.744044	qz
4863	8668	93.6772	101.607	6376.41	1.08465	326.737	0.92196	1	61.765	227.858	167.19	90.1266	1.15456	0.750186	qz
4870	8680	137.621	147.837	16838.4	1.07423	500.584	0.930898	1	94.6283	601.715	90.0676	146.459	1.08851	0.843993	qz
4871	8681	143.913	215.378	16980.8	1.49659	606.434	0.668187	1	114.638	606.801	100.439	147.077	1.31314	0.579937	qz
4875	8690	167.32	462.464	34754.3	2.76395	1184.52	0.361801	1	223.916	1241.93	66.8165	210.411	1.79284	0.311111	qz
4876	8691	146.002	234.67	17778.6	1.60731	646.211	0.622158	1	122.157	635.311	40.4261	150.492	1.36751	0.534734	qz
4877	8692	108.352	296.568	19697.9	2.73709	747.499	0.365352	1	141.304	703.897	96.953	158.407	1.50282	0.44278	qz
4878	8693	86.9417	145.431	7569.82	1.67275	382.003	0.597819	1	72.2123	270.504	78.3414	98.1992	1.23888	0.651542	qz
4880	8695	125.373	190.288	15094.5	1.51778	579.391	0.658859	1	109.526	539.396	103.266	138.667	1.33066	0.564762	qz
4885	8704	80.3677	163.66	9681.37	2.03639	433.075	0.491064	1	81.8667	345.96	42.1911	111.054	1.24194	0.648336	qz
4886	8705	100.605	238.185	14651.8	2.36754	617.821	0.42238	1	116.79	523.577	90	136.619	1.4402	0.482121	qz
4887	8706	150.021	290.282	34224.3	1.93495	800.581	0.51681	1	151.339	1222.99	107.219	208.801	1.22108	0.670678	qz
4888	8707	114.441	210.804	16669.8	1.84204	579.903	0.542877	1	109.623	595.689	74.3976	145.724	1.26735	0.6226	qz
4894	8716	92.9879	164.847	10935	1.77278	451.095	0.564087	1	85.2731	390.757	77.8976	118.025	1.21721	0.67495	qz
4896	8725	109.234	139.62	9724.21	1.27817	406.462	0.78237	1	76.8359	347.49	85.4635	111.299	1.16305	0.739271	qz
4897	8726	278.139	533.592	86977.9	1.91844	1493.24	0.521258	1	282.277	3108.12	73.8557	332.866	1.42867	0.489933	qz
4899	8728	123.057	184.856	15899.6	1.5022	531.815	0.665692	1	100.532	568.167	98.3198	142.318	1.19007	0.706082	qz
4900	8729	109.763	126.331	11302.6	1.15094	420.503	0.868856	1	79.4901	403.894	86.2017	119.993	1.11605	0.802842	qz
4905	8741	181.041	325.384	28901.3	1.7973	919.376	0.556391	1	173.795	1032.77	123.474	191.877	1.52595	0.429457	qz
4912	8752	84.9128	127.132	8850.77	1.4972	384.519	0.667913	1	72.6879	316.279	90.1834	106.183	1.15327	0.751856	qz
4913	8753	95.421	142.872	9783.37	1.49728	403.642	0.667879	1	76.3029	349.605	90.3132	111.637	1.15148	0.754197	qz
4914	8754	66.701	169.271	7879.03	2.53776	421.473	0.394049	1	79.6735	281.554	95.5997	100.185	1.33979	0.557088	qz
4915	8755	358.897	756.402	152810	2.10758	2576.82	0.474478	1	487.112	5460.59	91.1364	441.205	1.86	0.28905	qz
4916	8756	138.169	331.647	20928.2	2.40031	852.601	0.416614	1	161.172	747.86	96.009	163.279	1.66297	0.361601	qz
4923	8773	137.63	385.941	27141.8	2.80418	967.164	0.35661	1	182.829	969.901	89.88	185.945	1.65648	0.364442	qz
4926	8779	78.8708	125.353	6336.76	1.58935	344.051	0.629188	1	65.038	226.441	60.2551	89.846	1.21954	0.672373	qz
4931	8786	130.911	195.405	16831.3	1.49265	534.219	0.669948	1	100.987	601.458	129.981	146.428	1.16189	0.740742	qz
4932	8787	82.774	90.2679	6069.79	1.09053	284.503	0.916981	1	53.7813	216.901	171.639	87.933	1.0304	0.941868	qz
4933	8788	89.095	158.503	9714.06	1.77903	403.282	0.562103	1	76.2348	347.128	105.931	111.241	1.15455	0.750193	qz
4939	8795	98.5058	110.764	7953.76	1.12444	344.332	0.889328	1	65.0911	284.224	155.556	100.659	1.08942	0.842572	qz
4944	8807	74.0785	172.129	9658.6	2.3236	417.523	0.430367	1	78.9268	345.146	77.4167	110.923	1.19875	0.695894	qz
4945	8808	152.117	259.888	24148.2	1.70847	750.473	0.585319	1	141.866	862.927	101.985	175.391	1.36269	0.538524	qz
4948	8811	91.0483	184.582	12303	2.02729	489.252	0.493268	1	92.4862	439.642	68.9688	125.19	1.24461	0.645558	qz
4950	8819	78.797	122.729	6596.98	1.55753	331.157	0.642041	1	62.6006	235.74	22.2803	91.6722	1.15045	0.755555	qz
4951	8820	94.3741	202.013	12645.2	2.14055	515.237	0.467169	1	97.3982	451.872	80.0039	126.92	1.29285	0.598277	qz
4953	8829	219.839	267.585	38290.2	1.21719	941.37	0.821566	1	177.953	1368.28	95.9481	220.856	1.35744	0.542695	qz
4954	8830	74.2321	123.785	6558.34	1.66755	336.838	0.599684	1	63.6745	234.36	71.5797	91.4034	1.17363	0.726007	qz
4955	8831	139.007	227.12	16452.5	1.63388	625.971	0.61204	1	118.331	587.923	68.9625	144.771	1.37703	0.527367	qz
4959	8843	78.8434	125.236	5924.41	1.58841	327.594	0.629561	1	61.927	211.706	59.3526	86.8736	1.20093	0.693367	qz
4967	8856	165.152	175.287	18146.9	1.06137	612.18	0.94218	1	115.724	648.472	59.2033	152.043	1.28228	0.608183	qz
4968	8857	76.8661	132.594	7248.94	1.725	371.583	0.57971	1	70.2425	259.038	92.6026	96.0954	1.23147	0.659406	qz
4969	8858	99.9802	182.97	12422.9	1.83006	503.603	0.546429	1	95.1991	443.926	94.893	125.799	1.27492	0.615226	qz
4970	8859	81.1261	153.818	9034.32	1.89603	420.486	0.527417	1	79.4869	322.838	76.2651	107.279	1.24827	0.641774	qz
4979	8871	79.4176	190.693	8455.15	2.40115	446.634	0.416468	1	84.4299	302.141	89.7533	103.783	1.37056	0.532361	qz
4982	8877	127.549	157.645	12614.5	1.23596	501.777	0.809091	1	94.8538	450.774	151.699	126.765	1.26061	0.629273	qz
4989	8885	117.876	242.15	18725.7	2.05428	631.555	0.486789	1	119.387	669.154	123.213	154.449	1.30226	0.589664	qz
4990	8886	75.4854	133.575	7502.66	1.76955	361.025	0.565116	1	68.2467	268.104	93.3665	97.7626	1.17607	0.722987	qz
4994	8890	131.405	216.031	16790.3	1.64401	604.58	0.60827	1	114.287	599.993	65.9053	146.249	1.31653	0.576953	qz
5002	8911	104.658	209.871	10056.1	2.00531	560.562	0.498676	1	105.966	359.351	81.573	113.183	1.5773	0.401951	qz
5005	8914	131.989	278.056	24253.2	2.10666	710.883	0.474685	1	134.382	866.677	50.7423	175.772	1.28801	0.602785	qz
5008	8917	79.6231	137.791	8504.96	1.73055	372.015	0.577852	1	70.3242	303.921	89.9679	104.088	1.13823	0.771864	qz
5009	8918	117.638	261.066	23232.6	2.21924	654.063	0.450605	1	123.641	830.207	84.4334	172.034	1.21081	0.682099	qz
5012	8927	90.7723	131.557	8936.97	1.44931	372.095	0.689986	1	70.3393	319.359	160.18	106.699	1.11061	0.810724	qz
5015	8934	119.283	175.79	13845.1	1.47372	528.545	0.678554	1	99.914	494.75	4.39871	132.805	1.26747	0.622476	qz
5016	8935	112.266	143.022	11820.2	1.27396	435.751	0.784956	1	82.3726	422.391	80.0312	122.709	1.13092	0.781877	qz
5021	8944	112.086	164.609	14511.5	1.46859	479.438	0.680925	1	90.6309	518.563	72.9132	135.963	1.123	0.792936	qz
5022	8945	73.8828	174.884	7450.87	2.36704	425.292	0.422468	1	80.3956	266.254	86.0352	97.4246	1.39024	0.517394	qz
5026	8951	123.9	166.455	13105.6	1.34346	500.869	0.744345	1	94.6823	468.323	116.284	129.209	1.23453	0.656141	qz
5027	8952	94.1792	178.528	10647.6	1.89562	447.789	0.527531	1	84.6482	380.487	90.0515	116.464	1.22448	0.666951	qz
5033	8960	81.7784	236.458	14006	2.89145	543.491	0.345847	1	102.739	500.499	102.095	133.574	1.29581	0.595552	qz
5034	8961	86.7576	145.425	8298.05	1.67623	430.349	0.596578	1	81.3515	296.527	86.9717	102.814	1.33302	0.56276	qz
5039	8971	662.948	778.812	252502	1.17477	3033.33	0.85123	1	573.408	9023.06	94.4846	567.15	1.7033	0.34468	qz
5040	8972	225.288	862.709	103698	3.82936	2312.48	0.26114	1	437.141	3705.6	99.7192	363.454	2.02627	0.243559	qz
5041	8973	143.2	163.854	15901.1	1.14424	517.37	0.873946	1	97.8015	568.22	91.1252	142.324	1.15769	0.746131	qz
5045	8980	66.3971	183.629	7343.72	2.76563	449.921	0.361582	1	143.513	536.63	101.31	96.7215	1.48144	0.455652	qz
5054	8998	63.6845	116.423	6107.16	1.82813	314.984	0.547008	1	59.5433	218.237	90.0787	88.2033	1.1373	0.773128	qz
5055	8999	199.415	357.986	39621.4	1.79518	966.352	0.557047	1	182.675	1415.85	130.982	224.662	1.36986	0.532904	qz
5061	9009	137.45	206.742	18741.8	1.50412	614.53	0.664839	1	116.168	669.729	89.6633	154.515	1.26661	0.623325	qz
5063	9011	122.945	209.418	12329.8	1.70334	565.877	0.587082	1	106.971	440.601	81.998	125.327	1.43797	0.483619	qz
5066	9017	79.4126	201.126	11947.2	2.53267	526.382	0.39484	1	99.5051	426.929	89.8955	123.367	1.35885	0.54157	qz
5067	9018	93.7117	148.174	7582.84	1.58117	401.308	0.632444	1	75.8616	270.97	79.1212	98.2836	1.30037	0.591379	qz
5069	9020	93.0627	116.203	6818.85	1.24865	336.299	0.800864	1	63.5726	243.669	137.897	93.201	1.14915	0.757266	qz
5074	9028	102.954	137.932	8523.88	1.33974	388.727	0.746411	1	73.4834	304.597	93.5763	104.204	1.18804	0.708496	qz
5075	9029	92.7297	200.422	11565.4	2.16136	518.995	0.462672	1	98.1087	413.285	95.777	121.38	1.36172	0.539293	qz
5082	9039	128.586	184.551	15615.2	1.43523	516.06	0.696754	1	97.5539	558.003	73.4069	141.039	1.16528	0.736438	qz
5087	9045	118.398	143.585	12891.2	1.21273	467.256	0.824587	1	88.3282	460.66	165.168	128.148	1.16122	0.741604	qz
5088	9046	92.7328	157.84	8793.45	1.70209	415.379	0.587513	1	78.5216	314.23	98.0919	105.839	1.24989	0.640117	qz
5089	9047	138.751	231.815	18680.9	1.67072	644.266	0.598543	1	121.789	667.555	56.3099	154.264	1.33006	0.565272	qz
5090	9048	61.0848	145.831	6650.59	2.38736	360.807	0.418873	1	68.2054	237.656	94.7263	92.0439	1.24839	0.641654	qz
5091	9049	78.5297	99.5149	5947.43	1.26723	295.403	0.789125	1	55.8418	212.529	176.34	87.0422	1.08083	0.85603	qz
5100	9072	201.607	262.347	37857.8	1.30128	838.434	0.768474	1	158.494	1352.83	117.306	219.605	1.2159	0.676407	qz
5102	9074	95.22	143.048	8388.31	1.50229	422.797	0.665649	1	79.9239	299.753	90	103.372	1.30257	0.589386	qz
5103	9075	133.468	206.35	19535	1.54607	603.563	0.646803	1	114.095	698.073	87.5897	157.751	1.21849	0.673529	qz
5106	9086	63.16	119.158	6377.76	1.8866	326.204	0.530054	1	61.6642	227.906	86.3745	90.1362	1.15255	0.752801	qz
5109	9089	121.259	158.991	11028.4	1.31117	486.661	0.762679	1	91.9964	394.094	150.945	118.528	1.3076	0.584854	qz
5110	9090	94.9731	128.466	6265.42	1.35265	371.292	0.739289	1	70.1876	223.892	113.43	89.3388	1.32357	0.570831	qz
5111	9091	78.2198	162.914	8610.91	2.08277	402.021	0.48013	1	75.9964	307.707	76.0491	104.734	1.22244	0.669178	qz
5115	9098	248.606	450.036	66183.5	1.81024	1458.71	0.552412	1	275.749	2365.04	90.2649	290.362	1.59992	0.390662	qz
5121	9110	87.0157	121.252	7205.66	1.39345	336.987	0.717644	1	63.7027	257.491	158.399	95.808	1.12016	0.79696	qz
5122	9111	91.1669	102.714	6179.49	1.12666	323.028	0.88758	1	61.0639	220.821	72.8512	88.7241	1.1595	0.743809	qz
5126	9116	83.0596	110.782	6313.85	1.33376	320.127	0.749759	1	60.5155	225.623	69.718	89.6834	1.13679	0.773818	qz
5128	9118	167.563	265.475	30752.4	1.58433	797.643	0.631183	1	150.783	1098.92	35.3759	197.927	1.28344	0.607088	qz
5132	9124	137.195	169.763	16941	1.23739	518.053	0.808155	1	97.9306	605.379	62.7223	146.904	1.12308	0.79283	qz
5147	9144	101.217	166.537	10935	1.64534	459.392	0.607778	1	86.8417	390.758	134.013	118.025	1.23959	0.650791	qz
5148	9145	114.376	137.475	10451.7	1.20195	436.632	0.83198	1	82.5392	373.489	139.315	115.388	1.20511	0.688568	qz
5151	9151	95.2693	207.016	11908.3	2.17296	529.731	0.460202	1	100.138	425.539	71.4163	123.166	1.36973	0.533003	qz
5153	9159	89.9705	291.796	15833.1	3.24324	673.362	0.308334	1	127.29	565.789	88.5381	142.02	1.50998	0.438589	qz
5154	9160	84.6096	166.336	9072.66	1.96592	443.931	0.508666	1	83.919	324.208	97.0746	107.506	1.31508	0.578219	qz
5155	9161	151.263	243.921	23905.6	1.61257	719.576	0.62013	1	136.026	854.255	111.688	174.508	1.3132	0.579877	qz
5157	9163	78.927	139.246	7786.54	1.76424	381.559	0.566816	1	72.1284	278.249	17.0652	99.595	1.2201	0.671755	qz
5165	9175	88.4666	97.9631	5906.63	1.10735	321.771	0.903061	1	60.8262	211.071	18.0879	86.7431	1.18136	0.716534	qz
5169	9179	78.3059	123.648	7469.73	1.57904	351.134	0.633296	1	66.3769	266.928	105.706	97.5478	1.14637	0.760937	qz
5172	9187	75.7043	100.349	5728.35	1.32554	311.718	0.754409	1	58.9259	204.7	116.565	85.424	1.16212	0.740449	qz
5181	9202	506.169	1755.07	421336	3.46736	5440.26	0.288404	1	1028.41	15056.3	112.699	732.621	2.36489	0.178805	qz
5182	9203	90.4265	201.131	12597.4	2.22425	469.882	0.449589	1	88.8246	450.164	90.7966	126.679	1.18128	0.716628	qz
5187	9208	133.52	217.43	15393.1	1.62845	633.841	0.61408	1	119.819	550.065	86.986	140.032	1.44153	0.481232	qz
5189	9214	92.4595	174.088	10820.4	1.88286	485.22	0.531108	1	91.724	386.663	177.138	117.405	1.3162	0.57724	qz
5193	9218	81.7063	150.968	8392.46	1.8477	381.224	0.541214	1	72.065	299.901	67.3801	103.397	1.1742	0.725302	qz
5194	9219	93.5808	148.246	9577.99	1.58415	388.288	0.631254	1	73.4003	342.265	58.2806	110.459	1.11949	0.797914	qz
5204	9248	125.844	237.072	15039.1	1.88387	619.937	0.530823	1	117.19	537.416	84.8056	138.413	1.4264	0.491492	qz
5216	9270	97.1246	107.849	6845.75	1.11042	349.856	0.900557	1	66.1354	244.63	68.1986	93.3847	1.19312	0.702475	qz
5221	9278	162.738	272.465	25472.7	1.67425	792.376	0.597281	1	149.787	910.257	102.384	180.137	1.40087	0.509569	qz
5222	9279	139.347	154.466	17034.3	1.10849	534.216	0.902125	1	100.986	608.712	74.7857	147.308	1.15494	0.749685	qz
5225	9289	127.231	148.189	14150.7	1.16472	489.027	0.858576	1	92.4437	505.668	179.984	134.262	1.15998	0.743192	qz
5226	9290	102.117	164.897	12408.2	1.61479	472.283	0.619276	1	89.2785	443.401	84.2894	125.724	1.19634	0.698702	qz
5228	9292	92.15	184.806	11442.4	2.00549	474.396	0.498632	1	89.678	408.889	97.0048	120.732	1.25138	0.638592	qz
5229	9293	120.179	161.733	13950.8	1.34577	487.588	0.743069	1	92.1717	498.525	90.156	133.31	1.16482	0.737023	qz
5230	9294	61.5514	166.75	8141.01	2.70911	394.374	0.369124	1	74.5508	290.916	33.4868	101.837	1.23332	0.657433	qz
5231	9304	86.9769	188.036	11645.1	2.16191	488.037	0.462554	1	92.2565	416.132	93.5763	121.797	1.2761	0.614084	qz
5232	9305	173.585	299.508	30946.1	1.72543	831.588	0.579567	1	157.2	1105.85	86.0894	198.549	1.33386	0.562055	qz
5233	9306	122.564	190.071	10847.6	1.55079	539.458	0.644831	1	101.977	387.633	69.4243	117.552	1.46149	0.468173	qz
5234	9307	163.894	388.42	36087.1	2.36995	994.232	0.421951	1	187.946	1289.56	113.194	214.408	1.47678	0.458528	qz
5241	9318	132.33	137.834	12133.8	1.04159	470.422	0.960067	1	88.9266	433.597	89.8911	124.327	1.20502	0.688673	qz
5248	9330	151.849	306.412	21985.5	2.01787	825.52	0.495572	1	156.053	785.642	118.199	167.353	1.57096	0.405201	qz
5253	9337	121.855	143.442	12517.4	1.17715	456.117	0.849511	1	86.2224	447.303	104.6	126.276	1.15033	0.755703	qz
5259	9353	119.492	188.613	13625.2	1.57846	552.369	0.63353	1	104.418	486.89	79.7441	131.746	1.33525	0.560883	qz
5260	9354	75.4137	111.645	5617.45	1.48043	299.915	0.675479	1	56.6946	200.737	117.195	84.593	1.1291	0.784392	qz
5261	9360	82.751	353.877	17859.7	4.27641	828.001	0.233841	1	156.522	638.207	80.9021	150.835	1.74823	0.32719	qz
5264	9366	94.162	156.584	10268.7	1.66292	455.473	0.601351	1	86.1007	366.946	53.1301	114.373	1.26827	0.621696	qz
5265	9367	129.915	277.173	19534.9	2.1335	762.488	0.468713	1	144.138	698.071	78.1513	157.75	1.53933	0.422022	qz
5268	9370	88.3359	162.279	8277.24	1.83706	437.948	0.544347	1	82.7879	295.784	36.3844	102.685	1.35827	0.542038	qz
5272	9378	111.742	131.007	10766.1	1.17241	433.243	0.85294	1	81.8985	384.723	135.213	117.11	1.17817	0.720419	qz
5277	9386	224.05	825.26	108169	3.68337	2010.49	0.27149	1	380.054	3865.37	95.8446	371.207	1.72487	0.336116	qz
5284	9404	99.3487	155.69	10132.4	1.56711	482.788	0.638119	1	91.2643	362.076	16.6429	113.611	1.35334	0.545993	qz
5288	9414	153.01	440.61	41491.6	2.87961	1101.14	0.347269	1	208.156	1482.69	117.467	229.903	1.52535	0.429797	qz
5289	9415	138.284	320.602	32205.2	2.31843	808.397	0.431326	1	152.816	1150.84	76.693	202.548	1.27106	0.618965	qz
5290	9416	86.146	146.801	8684.48	1.7041	398.384	0.586821	1	75.3089	310.336	127.442	105.181	1.20624	0.687274	qz
5294	9420	91.0938	128.875	6115.87	1.41476	373.478	0.706836	1	70.6007	218.548	100.62	88.2662	1.34754	0.550705	qz
5297	9431	138.068	158.973	14575.8	1.15141	487.737	0.868502	1	92.1998	520.861	90.3735	136.264	1.13992	0.769576	qz
5299	9433	163.251	340.648	33156.9	2.08665	915.339	0.479238	1	173.032	1184.85	114.981	205.519	1.4184	0.49705	qz
5300	9434	74.4327	195.87	10547.5	2.6315	482.203	0.380012	1	91.1538	376.912	90.1167	115.915	1.32483	0.569745	qz
5301	9435	77.0319	197.614	10990.9	2.56535	484.224	0.38981	1	91.5358	392.755	73.3683	118.326	1.30327	0.588749	qz
5303	9440	86.4834	139.24	8521.78	1.61003	392.938	0.621108	1	74.2794	304.522	43.9865	104.191	1.20106	0.693221	qz
5307	9448	169.271	410.73	51531.5	2.42646	1045.72	0.412122	1	197.678	1841.46	78.6591	256.213	1.29982	0.591881	qz
5310	9458	68.1642	116.787	6841.91	1.71332	325.577	0.583662	1	61.5458	244.493	86.6335	93.3585	1.11063	0.810696	qz
5314	9462	112.396	211.528	17016.5	1.88199	546.266	0.531351	1	103.264	608.077	80.8335	147.231	1.18161	0.716228	qz
5315	9463	81.1038	170.053	9442.74	2.09673	442.767	0.476934	1	83.699	337.432	104.609	109.677	1.28568	0.604974	qz
5317	9468	80.4576	139.129	8371.42	1.72922	382.481	0.578297	1	72.3026	299.149	74.5832	103.268	1.17955	0.718736	qz
5318	9469	92.0922	151.01	10484.4	1.63977	425.569	0.609841	1	80.4478	374.655	51.1399	115.568	1.17274	0.727099	qz
5319	9470	115.583	186.354	13817	1.6123	510.341	0.620232	1	96.4728	493.744	96.7098	132.67	1.22507	0.666318	qz
5321	9472	79.8288	238.809	10552.9	2.99151	549.903	0.33428	1	103.951	377.103	75.3372	115.945	1.51045	0.438317	qz
5322	9478	230.439	354.398	51988	1.53792	1023.84	0.650228	1	193.543	1857.77	104.209	257.346	1.26703	0.622909	qz
5323	9479	98.3165	192.085	10473.7	1.95375	494.153	0.511837	1	93.4127	374.274	108.828	115.509	1.36244	0.538725	qz
5324	9480	189.277	245.825	29383.9	1.29876	861.324	0.769965	1	162.821	1050.02	57.8043	193.473	1.41781	0.497468	qz
5325	9481	107.563	126.243	8789.08	1.17367	388.759	0.852032	1	73.4894	314.074	66.472	105.813	1.17007	0.73042	qz
5328	9491	186.162	330.611	26866.8	1.77593	995.762	0.563086	1	188.235	960.074	65.8882	185.001	1.71417	0.340326	qz
5329	9492	183.338	544.95	55435.9	2.97237	1427.58	0.336431	1	269.865	1980.98	78.4821	265.742	1.71085	0.341647	qz
5331	9497	185.121	264.215	27204.5	1.42725	736.368	0.700646	1	139.2	972.142	123.743	186.16	1.25974	0.630145	qz
5333	9499	126.337	241.662	22927.6	1.91283	692.916	0.522786	1	130.986	819.308	55.4913	170.901	1.29124	0.599773	qz
5337	9510	160.929	238.109	20623.7	1.47959	664.695	0.675862	1	125.651	736.979	142.419	162.087	1.306	0.586288	qz
5339	9512	118.456	162.355	13292.9	1.37059	489.456	0.729612	1	92.5249	475.017	52.0686	130.129	1.19787	0.696919	qz
5342	9519	119.816	341.028	22096.7	2.84627	841.783	0.351337	1	159.127	789.616	75.2736	167.776	1.59787	0.391667	qz
5343	9520	116.85	216.09	18940.2	1.84929	586.016	0.540747	1	110.778	676.822	124.8	155.331	1.20149	0.692719	qz
5344	9521	144.073	270.331	24840.1	1.87634	763.73	0.532952	1	144.372	887.649	86.4622	177.886	1.36732	0.534888	qz
5347	9528	116.897	222.336	14438.9	1.90198	567.701	0.525768	1	107.316	515.967	111.801	135.623	1.33308	0.56271	qz
5351	9540	146.164	442.384	37451.9	3.02663	1112.67	0.330401	1	210.334	1338.33	103.11	218.425	1.62231	0.379955	qz
5352	9541	71.4468	166.022	8928.37	2.32371	423.05	0.430346	1	79.9717	319.052	85.9984	106.648	1.26331	0.626583	qz
5355	9546	86.0436	108.547	7149.03	1.26153	331.663	0.792687	1	62.6962	255.467	107.131	95.4308	1.10682	0.816287	qz
5356	9547	78.9753	130.14	7364.09	1.64786	378.012	0.60685	1	71.4579	263.153	164.716	96.8556	1.24294	0.647288	qz
5357	9548	107.857	149.559	11486.8	1.38665	445.504	0.721165	1	84.2163	410.476	96.7098	120.966	1.17289	0.726917	qz
5359	9550	134.248	187.476	14628.5	1.39649	562.129	0.716079	1	106.263	522.742	38.705	136.51	1.31142	0.581456	qz
5361	9552	144.814	204.16	16348.2	1.40981	568.286	0.709315	1	107.426	584.195	94.9697	144.311	1.25412	0.635806	qz
5362	9557	72.4131	132.809	6735.86	1.83404	345.257	0.545244	1	65.2659	240.703	108.435	92.6321	1.187	0.709738	qz
5366	9566	206.566	243.72	35486.9	1.17987	813.279	0.847554	1	153.739	1268.11	77.2656	212.618	1.21818	0.673873	qz
5368	9568	148.113	174.284	20551.6	1.1767	582.667	0.849838	1	110.145	734.402	106.833	161.803	1.14684	0.760314	qz
5376	9589	65.1338	142.804	7491.46	2.19246	362.89	0.456108	1	68.5993	267.704	79.5541	97.6896	1.18303	0.714505	qz
5377	9590	86.0771	331.214	18073	3.84787	736.89	0.259884	1	139.299	645.832	92.8624	151.733	1.54665	0.418037	qz
5378	9591	113.339	193.947	13613	1.71122	521.964	0.58438	1	98.6699	486.454	80.3747	131.687	1.26232	0.627571	qz
5379	9592	137.126	206.809	20543.7	1.50817	609.004	0.663054	1	115.124	734.122	106.326	161.773	1.19891	0.695712	qz
5383	9596	132.639	198.402	19211.6	1.4958	574.979	0.668537	1	108.692	686.518	58.5634	156.44	1.17051	0.729875	qz
5385	9601	91.9028	106.17	7085.74	1.15525	330.613	0.865616	1	62.4977	253.206	160.898	95.0075	1.10824	0.814209	qz
5391	9613	250.579	291.088	46043.4	1.16166	1172.67	0.860838	1	221.677	1645.34	19.4815	242.186	1.54205	0.420537	qz
5393	9615	117.219	145.731	13736.7	1.24324	479.631	0.804347	1	90.6674	490.875	13.8743	132.284	1.15471	0.749994	qz
5397	9624	164.601	193.846	18496.6	1.17767	696.296	0.849131	1	131.625	660.967	88.41	153.501	1.44462	0.479174	qz
5398	9625	136.792	253.955	22003.2	1.85651	663.807	0.538645	1	125.483	786.274	120.352	167.42	1.26271	0.627178	qz
5404	9633	134.421	215.698	17084.8	1.60464	606.445	0.623193	1	114.64	610.519	104.621	147.527	1.30916	0.583468	qz
5406	9635	86.3634	129.638	7394.71	1.50108	371.294	0.666187	1	70.1879	264.247	114.884	97.0568	1.21832	0.673713	qz
5407	9636	99.3256	154.839	10777.9	1.5589	430.141	0.641478	1	81.312	385.144	60.507	117.174	1.16909	0.731649	qz
5411	9644	84.249	109.883	7225.21	1.30426	342.22	0.766718	1	64.6919	258.19	176.397	95.938	1.13602	0.774871	qz
5415	9654	81.7735	159.847	8388.67	1.95476	387.145	0.511573	1	73.1844	299.766	81.0274	103.374	1.1927	0.702967	qz
5417	9656	104.728	143.866	11016.4	1.37371	407.886	0.727954	1	77.1051	393.665	115.152	118.463	1.09654	0.831668	qz
5418	9657	105.527	140.78	10910.8	1.33406	412.654	0.749589	1	78.0065	389.891	8.81563	117.894	1.11472	0.804769	qz
5420	9659	114.482	175.095	13749	1.52946	500.927	0.653826	1	94.6933	491.316	81.7985	132.343	1.20544	0.688196	qz
5422	9668	382.844	1342.64	292186	3.50701	3664.04	0.285143	1	692.635	10441.1	90.4982	610.091	1.91265	0.273356	qz
5423	9669	142.443	354.864	30423.6	2.49128	890.943	0.401401	1	168.42	1087.17	116.565	196.866	1.44128	0.481394	qz
5427	9681	195.055	264.84	38095.7	1.35777	839.405	0.736501	1	158.678	1361.33	90.039	220.294	1.2135	0.679084	qz
5432	9686	70.0388	128.427	6377.88	1.83365	339.949	0.545359	1	64.2625	227.911	75.2975	90.1371	1.2011	0.69317	qz
5433	9687	67.3307	139.898	6036.62	2.07778	346.152	0.481283	1	65.4351	215.716	81.8699	87.6924	1.25711	0.632777	qz
5434	9688	66.4548	131.108	6075.44	1.97289	330.914	0.506872	1	62.5546	217.103	70.0706	87.974	1.19793	0.696847	qz
5442	9704	193.053	486.365	64694.3	2.51933	1288.68	0.39693	1	243.608	2311.82	82.3464	287.077	1.42961	0.489285	qz
5449	9714	112.707	133.431	10895.8	1.18388	420.671	0.844683	1	79.5219	389.356	94.1306	117.813	1.13715	0.773327	qz
5453	9724	171.852	330.645	32025.2	1.92401	864.946	0.519748	1	163.506	1144.41	80.2176	201.981	1.36379	0.537655	qz
5454	9725	74.2661	137.724	7260.66	1.85447	352.798	0.539238	1	66.6915	259.457	32.8086	96.173	1.16827	0.732679	qz
5461	9737	210.41	291.561	43025.9	1.38568	873.335	0.721666	1	165.092	1537.51	86.7141	234.116	1.18801	0.708529	qz
5464	9740	84.9905	114.176	6746.91	1.3434	347.601	0.74438	1	65.709	241.098	53.9726	92.7081	1.19408	0.701347	qz
5465	9741	111.439	208.558	15280.3	1.8715	552.279	0.534331	1	104.401	546.037	61.3872	139.518	1.26066	0.629225	qz
5466	9742	99.84	206.833	12845	2.07164	594.444	0.482709	1	112.371	459.011	41.371	127.918	1.47996	0.456565	qz
5468	9747	100.889	145.212	11031.2	1.43932	404.575	0.694774	1	76.4792	394.194	90.519	118.543	1.08691	0.846473	qz
5469	9748	66.2212	125.392	5923.53	1.89353	313.303	0.528114	1	59.2255	211.675	100.345	86.8671	1.14863	0.757952	qz
5470	9749	136.22	180.852	14978.6	1.32765	559.021	0.753213	1	105.675	535.253	36.7439	138.134	1.28884	0.60201	qz
5475	9759	137.45	172.887	15383	1.25781	523.383	0.795031	1	98.9382	549.703	117.022	139.986	1.19071	0.705326	qz
5478	9762	54.7679	180.496	6461.61	3.29565	431.436	0.30343	1	81.557	230.903	81.7627	90.7268	1.51444	0.43601	qz
5480	9767	76.8253	111.665	6561.56	1.45349	322.914	0.687998	1	61.0423	234.475	112.501	91.4258	1.12483	0.790357	qz
5481	9768	85.1247	165.612	10580.1	1.94552	437.32	0.514002	1	82.6692	378.075	108.435	116.094	1.19966	0.694834	qz
5489	9781	95.2028	173.055	9932.4	1.81776	453.787	0.550129	1	85.7821	354.93	86.4525	112.484	1.28478	0.605814	qz
5495	9793	267.156	503.847	77537.4	1.88597	1446.59	0.530233	1	273.457	2770.77	101.768	314.283	1.46587	0.465383	qz
5497	9795	104.096	184.468	13182.2	1.7721	488.95	0.564302	1	92.4291	471.062	20.1154	129.586	1.20164	0.692549	qz
5499	9801	95.3269	141.63	8273.68	1.48573	396.723	0.67307	1	74.995	295.656	0	102.663	1.23068	0.660257	qz
5506	9810	99.7302	226.138	15127.1	2.2675	561.114	0.441014	1	106.071	540.559	60.8061	138.817	1.2873	0.603451	qz
5509	9813	325.003	406.108	73887.7	1.24955	1350.7	0.800287	1	255.33	2640.34	86.5979	306.797	1.40209	0.508682	qz
5512	9820	99.9695	282.396	12847.7	2.82482	677.772	0.354005	1	128.123	459.106	80.8747	127.931	1.68724	0.351274	qz
5513	9821	152.127	185.15	21138.3	1.21707	591.66	0.821642	1	111.845	755.37	0	164.097	1.14827	0.75843	qz
5517	9832	115.426	229.058	14476.9	1.98446	630.38	0.503917	1	119.164	517.327	104.101	135.801	1.47832	0.457574	qz
5520	9841	218.161	291.737	36759.8	1.33725	948.127	0.747803	1	179.23	1313.6	66.8014	216.397	1.39536	0.513606	qz
5523	9844	74.6262	146.717	8275.24	1.96603	383.12	0.508639	1	72.4235	295.712	75.0686	102.673	1.18836	0.70811	qz
5526	9849	137.523	399.144	29840.6	2.90237	986.064	0.344546	1	186.401	1066.34	85.5267	194.971	1.61067	0.385467	qz
5533	9870	67.4751	142.101	6564.35	2.10597	348.645	0.47484	1	65.9064	234.574	104.923	91.4452	1.21421	0.678289	qz
5541	9881	109.959	207.144	13894.1	1.88383	556.423	0.530834	1	105.184	496.499	61.7805	133.039	1.33197	0.563649	qz
5549	9896	119.335	369.297	26156.4	3.09463	915.528	0.32314	1	173.068	934.69	111.995	182.539	1.5973	0.391945	qz
5551	9898	219.632	514.743	66795.5	2.34367	1499.09	0.426682	1	283.381	2386.91	84.0558	291.701	1.63666	0.373321	qz
5557	9909	101.505	136.291	9649.75	1.3427	369.217	0.744768	1	69.7953	344.83	35.6558	110.872	1.06055	0.889081	qz
5558	9910	157.765	292.562	35448.7	1.85442	827.488	0.539253	1	156.425	1266.75	78.6901	212.503	1.24013	0.65023	qz
5559	9911	143.88	279.19	27467.1	1.94044	841.449	0.515347	1	159.064	981.524	99.6448	187.056	1.43261	0.487244	qz
5572	9932	138.212	195.245	17651.8	1.41264	570.21	0.707894	1	107.79	630.781	56.4633	149.955	1.211	0.681883	qz
5580	9954	73.5075	127.569	6678.39	1.73545	345.812	0.57622	1	65.371	238.649	72.8973	92.2361	1.19402	0.701423	qz
5593	9977	61.5782	152.653	7812.49	2.479	383.677	0.403388	1	72.5287	279.176	149.744	99.7608	1.22483	0.666574	qz
5604	10006	139.489	239.838	19940.4	1.71941	670.962	0.581595	1	126.836	712.563	106.928	159.38	1.34071	0.556325	qz
5606	10008	106.249	196.897	12624.3	1.85316	532.515	0.539618	1	100.664	451.122	109.131	126.814	1.33732	0.559154	qz
5628	10049	148.746	327.648	27509.6	2.20274	833.739	0.453981	1	157.607	983.044	65.9897	187.201	1.41838	0.497066	qz
5632	10053	101.922	278.331	18001.5	2.73082	667.119	0.366191	1	126.109	643.276	145.236	151.433	1.40299	0.508033	qz
5633	10056	178.274	358.956	33241.7	2.01351	981.51	0.496644	1	185.541	1187.88	117.791	205.782	1.519	0.433395	qz
5635	10058	149.468	416.887	42913.7	2.78914	1057.49	0.358533	1	199.903	1533.5	109.175	233.81	1.4404	0.481987	qz
5640	10073	87.3825	135.198	8296.92	1.5472	352.804	0.64633	1	66.6927	296.487	47.4745	102.807	1.0929	0.837219	qz
5649	10095	130.851	177.123	16885.7	1.35363	543.356	0.738754	1	102.714	603.403	79.992	146.664	1.17986	0.718356	qz
5650	10096	86.9879	141.284	7540.26	1.62418	381.292	0.615695	1	72.0778	269.448	161.565	98.0073	1.23899	0.651421	qz
5661	10120	101.154	145.038	10593.8	1.43384	445.564	0.697427	1	84.2276	378.566	100.472	116.169	1.22149	0.670227	qz
5672	10135	134.412	143.522	13890.6	1.06778	460.302	0.936524	1	87.0136	496.373	149.723	133.023	1.10202	0.823424	qz
5674	10143	184.071	446.829	48559.9	2.42748	1090.42	0.411949	1	206.129	1735.27	118.142	248.716	1.39624	0.512955	qz
5675	10144	77.1502	119.31	6832.42	1.54646	329.812	0.646637	1	62.3463	244.154	149.17	93.2937	1.12586	0.788917	qz
5678	10159	120.735	241.62	16068.2	2.00124	698.248	0.49969	1	131.994	574.19	81.1321	143.07	1.55429	0.413939	qz
5679	10160	179.346	245.025	22310.6	1.36622	848.839	0.731949	1	160.461	797.26	75.3077	168.586	1.60352	0.388911	qz
5682	10167	156.143	226.101	21721.3	1.44803	667.615	0.690593	1	126.203	776.201	126.27	166.344	1.27817	0.612101	qz
5687	10179	110.063	126.95	11723.5	1.15343	420.678	0.866981	1	79.5232	418.933	0.119632	122.206	1.09629	0.832045	qz
5691	10187	100.677	241.108	12483.8	2.39486	597.729	0.417562	1	112.992	446.102	82.5105	126.107	1.50951	0.43886	qz
5692	10188	137.949	255.23	21783.5	1.85018	704.056	0.540488	1	133.092	778.423	97.224	166.582	1.34601	0.551953	qz
5694	10190	113.123	145.17	10180.8	1.28329	426.775	0.779245	1	80.6758	363.808	68.7495	113.882	1.19347	0.702062	qz
5698	10194	100.14	188.804	12683	1.88541	477.807	0.53039	1	90.3227	453.222	81.7034	127.109	1.19714	0.697761	qz
5706	10213	170.554	186.481	16759.6	1.09338	662.956	0.914595	1	125.322	598.897	78.744	146.116	1.44497	0.478943	qz
5711	10220	81.8733	123.522	7054.91	1.5087	341.913	0.662823	1	64.6338	252.104	72.8153	94.8006	1.14862	0.757967	qz
5714	10232	83.3303	106.295	6073.74	1.27559	302.936	0.783951	1	57.2659	217.042	29.7449	87.9616	1.0968	0.831271	qz
5738	10279	66.3544	215.749	8919.48	3.25147	504.886	0.307553	1	95.4417	318.734	97.4387	106.595	1.50844	0.439483	qz
5739	10280	309.974	722	142200	2.32922	2056.03	0.429328	1	388.664	5081.45	103.459	425.613	1.53846	0.422501	qz
5747	10297	141.192	280.06	19915.5	1.98353	764.405	0.504151	1	144.5	711.673	84.9575	159.28	1.52839	0.428089	qz
5749	10299	154.699	192.965	19052.3	1.24736	655.413	0.801693	1	123.897	680.826	131.424	155.79	1.33982	0.557067	qz
5762	10324	101.059	271.065	18716.7	2.68223	674.511	0.372824	1	127.507	668.834	83.6549	154.412	1.39117	0.516703	qz
5770	10339	128.764	264.123	25362.3	2.05121	745.237	0.487516	1	140.876	906.311	2.1211	179.746	1.3204	0.573574	qz
5787	10366	117.969	155.345	11599.9	1.31683	469.547	0.759402	1	88.7612	414.516	114.444	121.56	1.23015	0.660821	qz
5788	10367	123.065	227.502	19382.7	1.84864	628.424	0.540938	1	118.795	692.632	75.2417	157.135	1.27365	0.61645	qz
5796	10375	92.1969	230.864	12676.5	2.50403	567.814	0.399356	1	107.337	452.989	71.4646	127.076	1.42302	0.493829	qz
5798	10378	101.037	167.944	11334	1.6622	462.162	0.601612	1	87.3652	405.016	105.341	120.159	1.22492	0.666477	qz
5820	10415	68.966	140.048	7955.29	2.03068	381.625	0.492446	1	72.1408	284.279	77.3778	100.668	1.2073	0.686076	qz
5830	10430	75.9745	134.322	6209.55	1.76799	340.596	0.565615	1	64.3849	221.896	98.5086	88.9396	1.21959	0.672312	qz
5835	10437	167.745	284.844	29323.4	1.69808	765.498	0.588901	1	144.707	1047.86	127.533	193.274	1.26137	0.628516	qz
5839	10447	201.642	344.871	30311.6	1.71031	1080.91	0.584689	1	204.33	1083.17	110.258	196.503	1.75182	0.325853	qz
5852	10476	68.6086	164.665	8343.22	2.40007	395.487	0.416655	1	74.7613	298.141	81.1844	103.094	1.22172	0.669975	qz
5853	10477	103.195	154.436	10008	1.49655	435.534	0.668203	1	82.3315	357.632	42.2737	112.912	1.22844	0.662665	qz
5861	10485	99.8258	203.653	13657.7	2.04008	558.242	0.490176	1	105.528	488.052	92.2026	131.903	1.34784	0.550456	qz
5867	10498	115.917	226.619	14598.9	1.95502	606.382	0.511504	1	114.628	521.685	73.2108	136.372	1.41609	0.498673	qz
5875	10513	99.5213	184.627	10965	1.85515	502.134	0.539039	1	94.9214	391.831	100.976	118.187	1.35307	0.546212	qz
5903	10552	102.094	136.561	9806.82	1.33761	410.206	0.747604	1	77.5438	350.443	59.8156	111.771	1.16881	0.732003	qz
5905	10559	120.197	181.792	14727.6	1.51245	507.066	0.66118	1	95.8537	526.284	87.1376	136.972	1.17897	0.719435	qz
5907	10561	108.157	222.243	16781.5	2.05483	589.226	0.486659	1	111.385	599.68	91.4382	146.211	1.28343	0.607095	qz
5929	10597	119.49	192.25	16713.2	1.60892	528.723	0.621535	1	99.9477	597.241	73.4675	145.914	1.15399	0.750919	qz
5930	10602	177.501	462.156	43571.5	2.60368	1126.67	0.384072	1	212.98	1557.01	95.7219	235.595	1.523	0.431123	qz
5931	10603	142.209	202.315	18872.1	1.42267	567.201	0.702906	1	107.221	674.385	172.128	155.051	1.16502	0.736776	qz
5959	10653	106.905	130.249	9418.74	1.21835	421.498	0.82078	1	79.6782	336.575	73.1406	109.537	1.22547	0.665874	qz
5974	10683	122.578	234.326	16886.4	1.91166	586.848	0.523106	1	110.935	603.427	116.565	146.667	1.27427	0.61585	qz
5975	10684	85.8202	134.768	8663.67	1.57035	365.85	0.6368	1	69.1588	309.593	130.328	105.055	1.10907	0.812991	qz
5983	10703	109.269	207.778	13346.3	1.90152	536.46	0.525896	1	101.41	476.924	64.2853	130.39	1.31028	0.582472	qz
5984	10704	78.5123	123.514	7255.33	1.57318	348.444	0.635655	1	65.8685	259.266	78.0601	96.1377	1.15428	0.750551	qz
5994	10723	211.04	407.966	57296.2	1.93312	1113.93	0.517299	1	210.573	2047.46	99.7824	270.164	1.31311	0.579963	qz
5995	10724	139.402	313.523	32582.3	2.24905	846.087	0.444632	1	159.941	1164.32	88.0908	203.731	1.3226	0.571665	qz
5999	10735	81.7129	180.116	8776.11	2.20425	441.14	0.453669	1	83.3914	313.611	89.8344	105.734	1.32871	0.566419	qz
6003	10743	88.4725	111.669	8122.95	1.26219	342.748	0.792272	1	64.7917	290.27	89.5454	101.724	1.07306	0.868467	qz
6005	10751	117.287	142.118	11282.8	1.21171	456.428	0.825281	1	86.2814	403.185	53.4798	119.887	1.21247	0.680236	qz
6006	10752	95.22	170.011	12254.9	1.78546	458.674	0.560081	1	86.7058	437.925	90	124.945	1.16911	0.731631	qz
6014	10768	65.2878	123.099	6255.05	1.88548	318.405	0.530369	1	60.1901	223.522	92.8526	89.2649	1.13598	0.774925	qz
6019	10777	117.698	136.896	9576.13	1.16312	501.689	0.859757	1	94.8372	342.199	168.138	110.449	1.44659	0.477871	qz
6020	10778	165.313	274.326	28549.6	1.65944	712.56	0.602613	1	134.699	1020.21	106.22	190.706	1.18994	0.706233	qz
6023	10785	114.335	213.243	18823	1.86507	576.513	0.536173	1	108.982	672.632	77.45	154.849	1.18569	0.711313	qz
6031	10798	142.904	238.198	22809.6	1.66684	670.702	0.599939	1	126.787	815.09	90	170.46	1.25307	0.636866	qz
6032	10804	60.1333	156.844	6759.7	2.60828	396.874	0.383394	1	75.0235	241.555	73.389	92.796	1.36205	0.539028	qz
6042	10823	144.456	234.334	23952.9	1.62219	699.383	0.616452	1	132.208	855.948	116.674	174.681	1.27509	0.615062	qz
6043	10824	98.7972	104.754	7955.63	1.06029	340.492	0.943138	1	64.3651	284.291	161.83	100.671	1.07715	0.861889	qz
6055	10840	171.106	330.07	36237.1	1.92904	846.973	0.518392	1	160.108	1294.92	97.7422	214.853	1.25545	0.634459	qz
6078	10888	334.756	419.557	69600.4	1.25332	1937.5	0.797879	1	366.257	2487.14	93.0128	297.763	2.07224	0.232873	qz
6079	10889	191.119	274.394	30494.6	1.43572	832.011	0.696514	1	157.28	1089.71	69.9462	197.096	1.34438	0.553293	qz
6086	10908	108.52	147.171	10039.6	1.35617	415.628	0.737371	1	78.5686	358.761	16.583	113.09	1.17045	0.729955	qz
6087	10909	87.6274	106.663	5898.2	1.21723	342.423	0.821535	1	64.7302	210.77	83.6598	86.6812	1.25808	0.631807	qz
6094	10921	256.47	411.879	49234.1	1.60595	1564.75	0.622683	1	295.794	1759.36	152.581	250.437	1.98984	0.25256	qz
6103	10954	142.086	153.946	13878.7	1.08347	512.627	0.922963	1	96.9049	495.949	7.43141	132.966	1.22781	0.663339	qz
6104	10955	104.033	154.801	10865.2	1.488	431.497	0.672043	1	81.5685	388.263	133.079	117.648	1.16806	0.732945	qz
6107	10963	111.703	170.786	10657.1	1.52892	495.529	0.654055	1	93.6727	380.827	143	116.516	1.35442	0.545119	qz
6111	10967	94.496	175.35	13301	1.85563	481.749	0.5389	1	91.0679	475.307	97.2093	130.169	1.17865	0.719835	qz
6112	10974	197.859	280.465	33206.1	1.4175	985.705	0.705467	1	186.334	1186.61	95.5722	205.672	1.52631	0.429253	qz
6113	10975	76.8253	144.796	8095.17	1.88474	382.937	0.530576	1	72.3889	289.278	115.14	101.55	1.20094	0.693363	qz
6121	10985	114.62	174.736	11139.8	1.52449	500.361	0.655958	1	94.5862	398.077	55.8081	119.125	1.33767	0.558857	qz
6122	10986	140.349	337.628	22910.3	2.40563	855.092	0.415692	1	161.643	818.69	87.5738	170.836	1.59405	0.393545	qz
6129	10999	94.7286	217.979	15857.1	2.30109	529.836	0.434578	1	100.158	566.646	88.5327	142.127	1.18723	0.709464	qz
6152	11047	162.658	322.808	26156.8	1.98458	881.535	0.503886	1	166.642	934.704	83.6598	182.54	1.53798	0.422762	qz
6153	11048	128.234	206.005	16460	1.60648	561.54	0.622479	1	106.151	588.189	137.096	144.804	1.23501	0.655627	qz
6168	11083	142.291	471.744	42183	3.31535	1140.57	0.301627	1	215.609	1507.39	89.3004	231.811	1.56696	0.407271	qz
6169	11084	86.1087	181.001	10012.7	2.10201	462.827	0.475735	1	87.491	357.798	101.31	112.938	1.30512	0.587085	qz
6173	11092	207.124	440.45	64627.5	2.1265	1141.94	0.470256	1	215.868	2309.44	77.1314	286.929	1.26748	0.622471	qz
6178	11103	112.172	187.94	11856.8	1.67546	516.851	0.59685	1	97.7035	423.699	103.606	122.899	1.33933	0.557478	qz
6182	11111	100.742	307.549	18569	3.05284	764.28	0.327564	1	144.476	663.555	82.1183	153.801	1.58257	0.399275	qz
6188	11123	348.401	573.375	127371	1.64573	2084.35	0.607632	1	394.017	4551.54	95.5944	402.81	1.64794	0.368229	qz
6189	11124	147.234	368.247	32267.7	2.5011	944.921	0.399824	1	178.624	1153.07	109.415	202.744	1.48428	0.453906	qz
6197	11142	79.4955	90.0479	5935.32	1.13274	287.293	0.882813	1	54.3087	212.096	0	86.9536	1.05222	0.903201	qz
6198	11143	118.231	267.931	21883.2	2.26617	705.462	0.441273	1	133.358	781.986	103.305	166.963	1.34562	0.552271	qz
6201	11161	354.419	657.259	104133	1.85447	2353.51	0.539238	1	444.897	3721.16	91.2027	364.217	2.05791	0.236128	qz
6213	11185	109.847	349.996	21860.8	3.18622	823.538	0.313852	1	155.678	781.185	84.0204	166.878	1.57165	0.404844	qz
6233	11226	82.9104	100.749	6384.7	1.21516	304.443	0.822939	1	57.5508	228.155	162.714	90.1852	1.07508	0.865201	qz
6234	11227	297.596	1029.58	158266	3.45967	2859.48	0.289045	1	540.545	5655.56	92.0535	449.013	2.02815	0.243109	qz
6239	11232	106.391	177.889	13503.4	1.67203	498.085	0.598075	1	94.156	482.539	113.493	131.156	1.20945	0.683637	qz
6243	11244	207.775	253.564	35730.3	1.22038	789.009	0.819419	1	149.151	1276.81	71.284	213.345	1.17779	0.720878	qz
6250	11264	147.897	163.504	15397	1.10552	534.623	0.904548	1	101.063	550.205	72.7742	140.05	1.21572	0.676598	qz
6264	11293	120.076	186.941	16394.9	1.55686	490.022	0.642319	1	92.6318	585.865	94.0856	144.517	1.07986	0.857565	qz
6277	11311	369.572	506.899	115270	1.37158	1587.85	0.729085	1	300.16	4119.11	68.1308	383.197	1.31964	0.574233	qz
6291	11342	325.722	925.234	153189	2.84057	2394.34	0.352042	1	452.617	5474.15	84.3612	441.753	1.72615	0.335618	qz
6296	11350	160.076	221.169	21023.9	1.38165	678.82	0.723773	1	128.321	751.279	119.982	163.652	1.321	0.573051	qz
6297	11351	101.107	215.734	15622	2.13371	537.632	0.468667	1	101.632	558.246	73.926	141.07	1.21373	0.678821	qz
6306	11373	123.844	311.235	19980.4	2.51312	751.193	0.397912	1	142.002	713.993	80.7155	159.539	1.49953	0.444725	qz
6311	11381	95.0014	206.817	12598.1	2.17699	513.611	0.45935	1	97.0909	450.187	90.6424	126.683	1.29118	0.599826	qz
6320	11390	110.57	142.776	10914.9	1.29128	428.704	0.774426	1	81.0405	390.039	119.78	117.917	1.15785	0.745923	qz
6332	11415	117.87	161.026	12273.9	1.36613	471.053	0.731993	1	89.046	438.602	68.2523	125.042	1.19973	0.694754	qz
6333	11417	212.301	275.426	40388.2	1.29734	876.963	0.770809	1	165.778	1443.26	89.5737	226.826	1.23129	0.659602	qz
6336	11420	74.0673	119.838	5942.6	1.61796	340.043	0.618064	1	64.2803	212.356	64.9924	87.0068	1.24466	0.645503	qz
6341	11433	116.861	163.259	14098.3	1.39703	490.163	0.715805	1	92.6584	503.797	103.311	134.014	1.16483	0.737014	qz
6345	11438	92.8364	127.918	7675.81	1.37788	380.844	0.725752	1	71.9931	274.292	34.6308	98.8843	1.22656	0.664692	qz
6349	11446	167.32	281.095	27343.9	1.67999	759.028	0.595243	1	143.483	977.124	89.0101	186.636	1.29519	0.596122	qz
6350	11452	238.358	508.43	71397.4	2.13305	1345.7	0.468812	1	254.386	2551.36	82.0704	301.583	1.42106	0.495194	qz
6354	11460	97.3949	228.474	12631.7	2.34585	554.012	0.426285	1	104.728	451.387	61.925	126.851	1.39089	0.516907	qz
6355	11461	145.16	177.592	16372.7	1.22343	564.161	0.817377	1	106.647	585.071	159.689	144.419	1.24408	0.646107	qz
6362	11482	108.806	198.102	13782.1	1.8207	512.085	0.549241	1	96.8025	492.498	69.5382	132.502	1.23081	0.660118	qz
6380	11521	205.687	339.583	39526	1.65097	1006.13	0.605706	1	190.195	1412.45	32.459	224.392	1.42796	0.490417	qz
6394	11553	81.8608	126.979	8346.67	1.55116	360.45	0.644679	1	68.138	298.265	94.5536	103.115	1.11325	0.806888	qz
6415	11586	145.623	254.697	23871.3	1.74902	693.689	0.57175	1	131.132	853.031	71.8986	174.383	1.26687	0.623069	qz
6416	11593	309.533	835.572	178628	2.69946	2483.2	0.370445	1	469.414	6383.19	101.27	477.024	1.65784	0.363844	qz
6420	11604	103.146	124.288	8362.27	1.20497	365.556	0.829898	1	69.1033	298.822	130.27	103.211	1.12797	0.785969	qz
6433	11625	69.7359	142.562	6646.7	2.04431	354.215	0.489162	1	66.9593	237.517	86.4499	92.0171	1.22594	0.665368	qz
6436	11628	133.862	175.698	16915.5	1.31254	608.214	0.761884	1	114.974	604.468	92.7263	146.794	1.31953	0.57433	qz
6458	11673	220.566	378.108	41249.5	1.71427	1056.84	0.58334	1	199.781	1474.03	85.8656	229.232	1.46827	0.463862	qz
6459	11677	85.7995	128.28	6743.66	1.49511	338.803	0.668846	1	64.0459	240.982	75.9638	92.6857	1.16414	0.73789	qz
6468	11691	123.127	322.859	24620.2	2.62217	769.552	0.381364	1	145.473	879.793	108.435	177.097	1.38388	0.522163	qz
6479	11720	390.27	1442.02	257720	3.69493	3699.68	0.270641	1	699.373	9209.52	93.1798	572.98	2.05634	0.236488	qz
6484	11731	189.765	275.757	26936.9	1.45315	823.726	0.68816	1	155.714	962.58	59.1292	185.242	1.41616	0.498623	qz
6494	11748	291.702	552.613	74820.2	1.89445	1804.88	0.527859	1	341.187	2673.67	60.5407	308.727	1.86185	0.288478	qz
6500	11758	147.53	259.199	24938.5	1.75692	662.713	0.569178	1	125.277	891.167	103.879	178.238	1.18412	0.713196	qz
6517	11786	91.9637	154.348	10399.3	1.67836	419.644	0.595821	1	79.3279	371.615	113.984	115.098	1.16114	0.741705	qz
6525	11805	145.601	205.001	17502.2	1.40796	612.394	0.710249	1	115.764	625.434	116.675	149.318	1.30614	0.586166	qz
[truncated: 2,670 more rows]

## Sheet: Pg
OBJECTID	TARGET_FID	Width	Length	Area	Aspect Ratio	Perimeter	Roundness	Mineral Code	Shape_Length	Shape_Area	Length Orientation (Clockwise from vertical direction: 0°; 180°)	Equivalent Diameter	Shape Factor 1	Shape Factor 2	Mineral
[truncated: 2,027 more rows]

[truncated: 7 more sheets: Cld, Grt, Chl, Pl, Bt, Ap, Amp]
