# Supplementary material for: Comparison between 2D and 3D microstructures and implications for metamorphic constraints using a chloritoid–garnet-bearing mica schist
Source: Copernicus journal article supplement (doi:10.5194/ejm-36-381-2024), 2024-05-03
Supplement: Supplementary file 2 [file ejm-36-381-2024-supplement.zip › Table S2.xlsx]

## Sheet: Caption
Table S2.	Complete dataset of mineral chemical analysis for sample BAR-38.

## Sheet: Garnet
Garnet
SiO2	37.92	37.91	37.75	38.24	37.91	38.18	37.9	38.15	37.38	38.28	38.06	37.86	38.01	38.18	37.75	37.76	37.54	37.76	38.22	38.66	38.05	38.09	38.18	38.66	37.64	38.01	38.88	38.11	38.23	38.11	38.45	38.17	38.43	38.38	37.65	37.93	37.83	37.84	37.94	38.06	38.11	38.1	38.45	38.28	37.19	37.69	37.81	37.91	37.99
TiO2	0	0.04	0.11	0.06	0.06	0.09	0.02	0.02	0.06	0.05	0.05	0.05	0.02	0.01	0.06	0.02	0.13	0.08	0.07	0.05	0.07	0.1	0.1	0.03	0.05	0.05	0.08	0.16	0.06	0.04	0.09	0.06	0.02	0.01	0.13	0.02	0.02	0	0.03	0.05	0.02	0.02	0.03	0.01	0.11	0.06	0.05	0.06	0.09
Al2O3	21.95	21.85	21.56	21.6	21.48	21.49	21.89	22.18	21.53	22.13	21.86	21.29	22.1	21.89	21.75	21.72	21.47	21.32	22.09	22.02	21.66	21.66	21.94	22.21	21.82	21.76	22.29	22.1	21.59	21.65	21.8	21.98	22.14	22.27	21.39	21.77	22.02	22.01	21.83	21.9	22.2	22.3	22.12	21.7	21.43	22.02	21.82	22.01	21.86
Cr2O3	0.06	0	0	0	0	0.02	0.02	0	0.04	0	0	0	0	0.03	0.08	0	0	0.03	0.01	0.05	0	0.02	0.04	0.06	0.01	0.05	0.05	0.05	0.01	0	0.04	0.02	0.02	0	0.03	0	0	0.02	0.06	0.07	0	0.01	0	0	0	0	0.01	0	0.01
FeOtot	37.7128	36.8678	35.5914	34.9818	33.9499	34.3427	36.3847	37.7429	39.0977	36.1458	39.0469	35.9429	37.6948	38.3517	39.0417	35.6767	35.1496	34.2418	33.9807	34.4838	36.6957	33.8638	37.5398	35.0899	34.9088	38.7689	37.24	35.155	35.199	36.15	36.37	38.3108	35.695	38.07	37.87	33.6669	36.7759	38.7217	36.8748	36.352	37.5989	38.8659	36.19	38.49	38.7717	33.9577	37.8148	37.3498	36.6918
MnO	1.5	0.77	1.74	2.67	3.24	2.74	1.65	1.17	0.49	0.9	0.49	1.91	1.25	0.89	0.52	2.13	2.69	3	0.79	1.15	0.97	0.62	0.94	0.59	0.76	0.93	0.74	1.66	2.37	0.92	1.09	0.68	0.88	0.51	0.57	0.54	1.38	0.91	0.9	0.97	1.33	0.98	1.03	0.62	0.58	0.58	1.26	0.81	1.29
MgO	2.63	2.38	1.72	1.75	1.53	1.75	1.95	2.57	1.5	2.55	1.6	2.55	2.81	2.85	1.63	1.76	1.49	1.24	2.28	2.57	1.78	2.3	2.45	2.04	2.56	3.11	2.5	2.02	1.74	1.99	2.36	3.42	2.75	1.67	1.71	2.19	2.59	3.17	2.86	2.52	2.58	3.05	2.76	1.64	1.67	2.39	2.39	2.94	2.37
CaO	1.78	3.42	4.65	4.33	4.31	5.14	4.2	1.99	2.65	3.97	2.83	2.41	1.84	2.01	2.76	4.31	4.77	4.98	6.28	3.48	4.67	6.1	2.8	5.32	4.17	0.6	2.35	4.04	3.98	3.56	3.19	0.78	3.53	2.55	2.58	5.96	1.96	0.74	2.3	3.01	1.82	0.66	2.84	2.7	2.61	5.64	1.83	2.17	3.23
Na2O	0	0.04	0.28	0.1	0.06	0.03	0	0.02	0.07	0.05	0.04	0.08	0	0.02	0.07	0.03	0.02	0.05	0.04	0.16	0.06	0	0.04	0.1	0.04	0	0	0.03	0	0.07	0.02	0.07	0	0.02	0.02	0.02	0.05	0.07	0.09	0	0.06	0	0	0	0.05	0.05	0.05	0	0.01
K2O	0.01	0	0.05	0	0	0	0	0	0.01	0.01	0	0.02	0	0	0.01	0	0	0	0	0.56	0.01	0	0	0.01	0.01	0.01	0	0	0.02	0.01	0.01	0	0	0	0.01	0.01	0	0	0	0.01	0	0	0	0	0	0.01	0	0	0
Total	103.66	103.4	103.74	103.86	102.58	103.93	104.2	103.89	102.98	104.22	104.06	102.17	103.81	104.38	103.79	103.57	103.45	102.81	103.92	103.28	104.14	102.84	104.14	104.14	102.04	103.34	104.13	103.33	103.21	102.51	103.41	103.57	103.47	103.48	101.96	102.15	102.66	103.64	102.97	102.96	103.77	104.04	103.43	103.45	102.56	102.54	103.12	103.34	103.64
O	12	12	12	12	12	12	12	12	12	12	12	12	12	12	12	12	12	12	12	12	12	12	12	12	12	12	12	12	12	12	12	12	12	12	12	12	12	12	12	12	12	12	12	12	12	12	12	12	12
Si	2.96	2.9597	2.9424	2.9784	2.9903	2.9708	2.9446	2.9673	2.9556	2.9573	2.9724	2.9922	2.9577	2.9575	2.9576	2.9525	2.9448	2.978	2.9509	3.0003	2.9576	2.9723	2.9634	2.9828	2.9638	2.9745	3.0121	2.9738	2.9969	3.0004	2.9992	2.9699	2.9838	3.0053	2.997	2.9777	2.9733	2.9501	2.9688	2.9799	2.9668	2.9595	2.991	3.0047	2.9508	2.9474	2.9687	2.9581	2.9618
Ti	0.0002	0.0025	0.0066	0.0033	0.0036	0.0053	0.0015	0.001	0.0038	0.0031	0.0032	0.0031	0.0011	0.0008	0.0036	0.0009	0.0078	0.0049	0.0038	0.0029	0.0041	0.0057	0.0057	0.0015	0.0027	0.0029	0.0046	0.0094	0.0034	0.0026	0.0053	0.0037	0.001	0.0007	0.0079	0.0009	0.0009	0	0.0018	0.0029	0.001	0.0011	0.002	0.0006	0.0068	0.0036	0.0032	0.0035	0.0054
Al	2.0194	2.0105	1.9806	1.9828	1.9969	1.9708	2.0044	2.0332	2.0064	2.0149	2.0121	1.9831	2.0268	1.9985	2.0084	2.0016	1.985	1.9817	2.0101	2.0141	1.9843	1.9921	2.007	2.0196	2.025	2.007	2.0352	2.0325	1.9947	2.0089	2.0042	2.0156	2.026	2.0553	2.0067	2.0143	2.0398	2.0224	2.0133	2.0209	2.0369	2.0415	2.028	2.0074	2.004	2.0295	2.0192	2.0242	2.0086
Cr	0.0038	0	0	0	0	0.0012	0.001	0	0.0026	0	0	0	0	0.0018	0.005	0	0	0.002	0.0007	0.003	0	0.0012	0.0027	0.0035	0.0005	0.0031	0.0031	0.0029	0.0005	0	0.0022	0.0012	0.0012	0	0.0018	0	0	0.0015	0.0035	0.0042	0	0.0003	0.0001	0	0	0	0.0003	0	0.0007
Fe3+	0.057	0.0714	0.1688	0.0694	0.0238	0.0804	0.1024	0.0333	0.0843	0.0724	0.0429	0.0399	0.0556	0.086	0.0752	0.096	0.1122	0.0582	0.0866	0.0559	0.1018	0.0507	0.0585	0.0235	0.048	0.0358	0	0.0031	0.0063	0	0	0.0464	0.0032	0	0	0.0315	0.0201	0.0869	0.0559	0.0104	0.036	0.0373	0	0	0.0881	0.0775	0.0446	0.0527	0.0573
Fe2+	2.4048	2.3352	2.1511	2.2098	2.2157	2.1549	2.262	2.4216	2.5012	2.2632	2.5076	2.3356	2.3971	2.3984	2.4827	2.2372	2.1938	2.2002	2.1074	2.1819	2.2838	2.1596	2.3782	2.2407	2.2509	2.5015	2.4128	2.2914	2.3013	2.3802	2.3726	2.4464	2.3149	2.493	2.521	2.1791	2.3975	2.4376	2.3569	2.3697	2.4119	2.487	2.3543	2.5266	2.4845	2.1434	2.4387	2.3847	2.3349
Mn	0.0992	0.0512	0.1149	0.1761	0.2165	0.1806	0.1086	0.0768	0.0326	0.059	0.0322	0.1279	0.0824	0.0583	0.0344	0.1411	0.1787	0.2004	0.0518	0.0759	0.0638	0.0409	0.0619	0.0388	0.0504	0.0615	0.0485	0.1097	0.1574	0.0617	0.0718	0.0445	0.058	0.0336	0.0387	0.0358	0.0919	0.0603	0.0595	0.0645	0.0877	0.0646	0.0677	0.0414	0.0392	0.0386	0.0839	0.0534	0.0852
Mg	0.306	0.277	0.1998	0.2032	0.1804	0.203	0.2258	0.2979	0.177	0.2936	0.1866	0.3004	0.3259	0.3291	0.1903	0.2051	0.1743	0.1461	0.2624	0.2973	0.2062	0.2675	0.2834	0.2346	0.3005	0.3628	0.2887	0.2349	0.2033	0.2335	0.2744	0.3966	0.3183	0.1949	0.2029	0.2563	0.3034	0.3684	0.3336	0.2941	0.2994	0.3531	0.32	0.1923	0.1975	0.2786	0.2797	0.3419	0.2754
Ca	0.1489	0.2861	0.3883	0.3613	0.3643	0.4285	0.3496	0.1658	0.2245	0.3286	0.2368	0.2041	0.1534	0.1668	0.2317	0.3611	0.4009	0.4208	0.5195	0.2894	0.3889	0.51	0.2328	0.4398	0.3518	0.0504	0.1951	0.3378	0.3343	0.3003	0.2666	0.0652	0.2937	0.2139	0.22	0.5013	0.1651	0.0621	0.1928	0.2525	0.1518	0.0549	0.2367	0.2271	0.2219	0.4726	0.1539	0.1814	0.2698
Na	0	0.0063	0.0424	0.0157	0.0085	0.0046	0	0.003	0.0108	0.007	0.0061	0.0121	0	0.0029	0.0099	0.0045	0.0024	0.0077	0.0065	0.024	0.0089	0	0.006	0.0147	0.0054	0	0	0.0047	0	0.0113	0.0029	0.0104	0	0.0033	0.0025	0.0023	0.0082	0.0104	0.0139	0	0.0085	0	0	0	0.0073	0.0076	0.0078	0	0.0009
K	0.0007	0	0.005	0	0	0	0	0	0.0012	0.001	0.0001	0.0016	0	0	0.0011	0	0	0	0.0004	0.0553	0.0005	0	0.0004	0.0006	0.0011	0.0006	0	0	0.002	0.0012	0.0009	0	0	0	0.0014	0.0008	0	0.0004	0	0.001	0	0.0005	0	0	0	0.0014	0	0.0001	0
H	0	0	0	0	0	0	0	0	0	0	0	0	0	0	0	0	0	0	0	0	0	0	0	0	0	0	0	0	0	0	0	0	0	0	0	0	0	0	0	0	0	0	0	0	0	0	0	0	0
Σcations	8	7.9999	7.9999	8	8	8.0001	7.9999	7.9999	8	8.0001	8	8	8	8.0001	7.9999	8	7.9999	8	8.0001	8	7.9999	8	8	8.0001	8.0001	8.0001	8.0001	8.0002	8.0001	8.0001	8.0001	7.9999	8.0001	8	7.9999	8	8.0002	8.0001	8	8.0001	8	7.9998	7.9998	8.0001	8.0001	8.0002	8	8	8
Grossular	0.019	0.059	0.043	0.085	0.108	0.1	0.065	0.038	0.029	0.073	0.056	0.046	0.023	0.011	0.035	0.073	0.074	0.108	0.129	0.069	0.077	0.142	0.044	0.134	0.093	0	0.062	0.105	0.106	0.099	0.085	0	0.096	0.072	0.068	0.152	0.045	0	0.034	0.076	0.032	0	0.078	0.076	0.026	0.119	0.027	0.033	0.059
Almandine	0.813	0.791	0.752	0.748	0.743	0.725	0.768	0.817	0.851	0.768	0.845	0.786	0.81	0.812	0.844	0.76	0.744	0.74	0.716	0.766	0.775	0.725	0.803	0.758	0.761	0.841	0.819	0.769	0.768	0.799	0.794	0.829	0.776	0.849	0.844	0.733	0.81	0.832	0.8	0.795	0.817	0.84	0.79	0.846	0.842	0.73	0.824	0.805	0.787
Pyrope	0.103	0.094	0.07	0.069	0.061	0.068	0.077	0.101	0.06	0.1	0.063	0.101	0.11	0.111	0.065	0.07	0.059	0.049	0.089	0.104	0.07	0.09	0.096	0.079	0.102	0.122	0.098	0.079	0.068	0.078	0.092	0.134	0.107	0.066	0.068	0.086	0.103	0.126	0.113	0.099	0.101	0.119	0.107	0.064	0.067	0.095	0.095	0.115	0.093
Spessartite	0.034	0.017	0.04	0.06	0.073	0.061	0.037	0.026	0.011	0.02	0.011	0.043	0.028	0.02	0.012	0.048	0.061	0.067	0.018	0.027	0.022	0.014	0.021	0.013	0.017	0.021	0.016	0.037	0.052	0.021	0.024	0.015	0.019	0.011	0.013	0.012	0.031	0.021	0.02	0.022	0.03	0.022	0.023	0.014	0.013	0.013	0.028	0.018	0.029
[truncated: 10 more columns]

## Sheet: Chloritoid
Chloritoid
SiO2	25.14	25.12	24.93	24.93	25.04	25.17	25.12
TiO2	0	0	0	0.02	0.05	0.01	0.01
Al2O3	41.4	40.79	41.29	41.6	41.83	41.56	42.17
Cr2O3	0	0.01	0.07	0.04	0	0.05	0.03
FeOtot	23.9249	24.0989	23.852	23.9719	23.5	23.75	23.37
MnO	0.13	0.11	0.09	0.11	0.11	0.11	0.1
MgO	3.48	3.43	3.38	3.46	3.45	3.49	3.51
CaO	0.01	0	0	0	0.02	0	0.01
Na2O	0	0.01	0	0	0.02	0	0
K2O	0.01	0.01	0	0	0.01	0	0.02
Total	94.12	93.62	93.63	94.18	94.03	94.14	94.34
O	14	14	14	14	14	14	14
Si	2.0263	2.0382	2.0203	2.0083	2.0167	2.0267	2.0146
Ti	0	0.0002	0.0003	0.0009	0.0029	0.0006	0.0007
Al	3.9328	3.9007	3.9437	3.9497	3.9705	3.9441	3.986
Cr	0	0.0004	0.0045	0.0028	0	0.003	0.0016
Fe3+	0.0151	0.025	0.0107	0.029	0	0	0
Fe2+	1.5973	1.6104	1.6057	1.5858	1.5828	1.5993	1.5675
Mn	0.0091	0.0077	0.0061	0.0075	0.0072	0.0074	0.007
Mg	0.4181	0.4148	0.4083	0.4155	0.4142	0.4189	0.4196
Ca	0.0006	0	0.0003	0.0004	0.002	0	0.0011
Na	0	0.0022	0.0002	0	0.003	0	0
K	0.0006	0.0005	0	0	0.0007	0	0.0019
H	4	4	4	4	4	4	4
Σcations	7.9999	8.0001	8.0001	7.9999	8	8	8
XMg(Fe2+)	0.207	0.205	0.203	0.208	0.207	0.208	0.211

## Sheet: Plagioclase
Plagioclase
SiO2	68.38	68.96
TiO2	0	0
Al2O3	19.85	20.11
Cr2O3	0	0.03
FeOtot	0.008998	0
MnO	0	0
MgO	0.02	0
CaO	0.24	0.34
Na2O	12.11	11.57
K2O	0.06	0.09
Total	100.669	101.1
O	8	8
Si	2.9572	2.9828
Ti	0	0
Al	1.0117	1.0252
Cr	0	0.0011
Fe3+	0.0004	0
Fe2+	0	0
Mn	0	0
Mg	0.001	0
Ca	0.011	0.0156
Na	1.0154	0.9703
K	0.0034	0.005
H	0	0
Σcations	5	5
Anorthite	0.011	0.016
Albite	0.986	0.979
XAn	0.011	0.016

## Sheet: K-white mica
K-white mica
SiO2	51.07	54.69	52.64	55.38	53.37	53.43	52.31	54.9	54.45	49.98	54.31	56.16	54.35	51.99	52.95	53.61	54.34	54.42	54.78	54.99	54.32	53.38	51.49	52.81	55.74
TiO2	0.21	0.1	0.8	0.67	0.15	0.17	0.18	0.15	0.29	0.24	0.07	0.06	0.05	0.2	0.17	0.06	0.06	0.56	0.03	0.02	0.05	0.11	0.24	0.11	0.08
Al2O3	27.99	23.74	23.31	23.82	25.88	25.78	28.21	23.73	22.78	28.04	23.99	22.91	24.93	27.44	26.15	23.16	24.62	23.56	22.89	23.41	24.14	25.54	27.19	25.86	21.42
Cr2O3	0	0	0.01	0	0.05	0	0.08	0.08	0.04	0.06	0	0	0	0.07	0.01	0	0	0.04	0.02	0.02	0	0	0	0.02	0
FeOtot	4.38509	2.89736	2.77138	2.6904	2.23359	2.41146	3.25728	3.12233	2.96034	4.63397	2.94854	3.00345	2.6994	3.64419	2.74439	3.21052	2.45166	3.05932	3.29327	2.99633	2.8195	2.30365	3.36846	3.12231	3.04132
MnO	0.02	0	0.02	0.02	0.03	0	0	0	0.07	0.06	0.02	0.04	0.02	0	0.04	0.01	0	0.01	0.08	0.08	0.03	0.01	0	0.05	0.04
MgO	2.32	4.57	4.53	4.66	3.69	3.81	3.03	4.56	4.92	2.27	4.36	4.83	4.07	2.96	3.5	4.27	4.17	4.57	4.45	4.69	4.15	3.71	2.65	3.67	5.41
CaO	0.04	0.02	0	0.02	0.02	0.04	0.01	0.01	0.01	0.06	0	0.01	0	0.01	0.02	0	0.02	0.01	0.04	0.03	0	0.05	0.01	0	0.03
Na2O	0.31	0.09	0.01	0.01	0.15	0.11	0.33	0.04	0.13	0.44	0.01	0.05	0.1	0.47	0.24	0	0.03	0.17	0.28	0.05	0.11	0.15	0.28	0.17	0.14
K2O	9.97	9.92	10.4	10.01	10.17	10.05	9.75	10.5	10.19	9.9	10.93	10.45	10.03	9.5	9.87	10.67	10.68	9.73	8.86	10.27	10.22	10.17	10.06	9.96	9.69
Total	96.77	96.35	94.8	97.58	95.95	96.07	97.52	97.43	96.17	96.2	96.87	97.79	96.55	96.69	96	95.23	96.54	96.47	95.09	96.89	96.09	95.6	95.56	96.12	95.93
O	11	11	11	11	11	11	11	11	11	11	11	11	11	11	11	11	11	11	11	11	11	11	11	11	11
Si	3.3883	3.5988	3.5431	3.5938	3.5188	3.5204	3.4118	3.6475	3.5655	3.4273	3.4985	3.5931	3.5703	3.5816	3.6406	3.6089	3.587	3.5327	3.4353	3.5897	3.6045	3.3507	3.5753	3.4959	3.6833		3.54251	Si
Ti	0.0104	0.0049	0.0403	0.0328	0.0076	0.0086	0.0089	0.0027	0.0023	0.0101	0.0084	0.0032	0.0029	0.0275	0.0014	0.0009	0.0022	0.0052	0.0122	0.0075	0.0144	0.0122	0.0034	0.0053	0.0041		0.009576	Ti
Al	2.1886	1.8411	1.8491	1.8218	2.0111	2.0019	2.1685	1.7537	1.9275	2.132	2.0363	1.8295	1.9065	1.8275	1.7929	1.8107	1.8787	1.9921	2.138	1.8287	1.7773	2.2155	1.8613	2.0176	1.6682		1.93104	Al
Cr	0.0003	0	0.0004	0	0.0028	0	0.004	0	0	0.0036	0.0004	0	0	0.0023	0.0013	0.0008	0	0	0	0.0043	0.0023	0.003	0	0.0012	0		0.001068	Cr
Fe3+	0	0	0	0	0	0	0	0	0	0	0	0	0	0	0	0	0	0	0	0	0	0	0	0	0		0	Fe3+
Fe2+	0.2436	0.1596	0.1559	0.146	0.123	0.1328	0.1778	0.1629	0.1481	0.2007	0.1514	0.1799	0.1346	0.1684	0.1829	0.1647	0.1557	0.1273	0.188	0.1706	0.1639	0.2596	0.1624	0.1727	0.168		0.16802	Fe2+
Mn	0.0014	0	0.001	0.0011	0.0019	0.0001	0	0.0024	0.0011	0	0.002	0.0007	0	0.0006	0.0043	0.0047	0.0017	0.0005	0	0	0.0039	0.0033	0.001	0.0029	0.0024		0.00148	Mn
Mg	0.2294	0.4482	0.4545	0.4507	0.3626	0.3742	0.2946	0.4676	0.398	0.2908	0.3447	0.4266	0.4084	0.4483	0.4408	0.4588	0.4085	0.366	0.2635	0.4444	0.4855	0.2268	0.4278	0.3621	0.5328		0.392624	Mg
Ca	0.003	0.0011	0	0.0012	0.0016	0.0029	0.0009	0.0004	0	0.001	0.0014	0	0.0016	0.0004	0.003	0.0023	0	0.0032	0.0005	0.0006	0.0009	0.0046	0	0.0001	0.0023		0.00132	Ca
Na	0.0403	0.0114	0.0019	0.0018	0.0192	0.0136	0.0422	0.0059	0.0123	0.0599	0.031	0	0.0035	0.0218	0.0364	0.0058	0.0143	0.0192	0.0357	0.0051	0.017	0.0577	0.001	0.0222	0.0178		0.01988	Na
K	0.8438	0.8327	0.893	0.8286	0.8554	0.8447	0.8112	0.8658	0.8394	0.7989	0.8319	0.9123	0.8951	0.8169	0.7511	0.8598	0.8609	0.8586	0.8562	0.8758	0.8605	0.8466	0.9179	0.8411	0.8168		0.8486	K
H	2	2	2	2	2	2	2	2	2	2	2	2	2	2	2	2	2	2	2	2	2	2	2	2	2
Σcations	6.9491	6.8978	6.9392	6.8778	6.904	6.8992	6.9199	6.9089	6.8942	6.9243	6.906	6.9453	6.9229	6.8953	6.8547	6.9174	6.909	6.9048	6.9294	6.9267	6.9302	6.98	6.9501	6.9211	6.8957

## Sheet: Paragonite
Paragonite
SiO2	48.26	48.93	48.25	48.16	47.74	47.96	48.01
TiO2	0.06	0.06	0.06	0.07	0.08	0.03	0.05
Al2O3	37.8	39	38.6	38.33	37.69	39.78	37.85
Cr2O3	0	0.01	0.04	0.01	0.07	0.01	0.01
FeOtot	0.500942	0.440902	0.332926	0.530882	0.438938	0.350922	0.396954
MnO	0	0.04	0.01	0	0	0	0
MgO	0.19	0.28	0.26	0.25	0.18	0.09	0.15
CaO	0.03	0.05	0.1	0.05	0.05	0.06	0.04
Na2O	6.71	6.46	6.74	6.89	6.84	7.18	6.85
K2O	1.15	0.93	0.83	1.03	0.92	0.54	0.87
Total	94.73	96.25	95.26	95.38	94.04	96.04	94.25
O	11	11	11	11	11	11	11
Si	3.0969	3.0819	3.0725	3.0726	3.085	3.0303	3.0918		3.07586
Ti	0.003	0.0028	0.0031	0.0036	0.0041	0.0015	0.0022		0.0029
Al	2.8589	2.8952	2.897	2.8821	2.8705	2.9623	2.8728		2.89126
Cr	0	0.0006	0.0022	0.0006	0.0036	0.0005	0.0006		0.00115714
Fe3+	0	0	0	0	0	0	0		0
Fe2+	0.027	0.0233	0.0177	0.0282	0.0236	0.0185	0.0217		0.0228571
Mn	0	0.0021	0.0007	0	0	0	0		0.0004
Mg	0.0181	0.0258	0.0251	0.024	0.0173	0.0084	0.014		0.0189571
Ca	0.0021	0.0036	0.0068	0.0034	0.0034	0.0041	0.0026		0.00371429
Na	0.8349	0.7889	0.8322	0.8523	0.857	0.8796	0.8553		0.842886
K	0.0945	0.075	0.0672	0.0836	0.0758	0.0432	0.0719		0.0730286
H	2	2	2	2	2	2	2
Σcations	6.935	6.899	6.925	6.95	6.94	6.948	6.933

## Sheet: Biotite
Biotite
SiO2	38.06	37.37	35.58	35.74	37.12
TiO2	1.31	0.94	0.81	1.51	0.46
Al2O3	17.24	17.75	18.42	17.83	17.18
Cr2O3	0.04	0	0.03	0.05	0.01
FeOtot	20.23	19.87	24.77	26.86	26.48
MnO	0.04	0.05	0.05	0.08	0.13
MgO	9.23	9.54	7.49	5.87	6.57
CaO	0.07	0.04	0.08	0.05	0.06
Na2O	0.09	0.12	0.14	0.05	0.07
K2O	8.07	8.49	8.27	8.52	8.17
Total	94.38	94.17	95.64	96.56	96.25
O	11	11	11	11	11
Si	2.9566	2.9107	2.7722	2.8045	2.8945
Ti	0.0764	0.0551	0.0473	0.089	0.0268
Al	1.5784	1.6294	1.6915	1.6489	1.5789
Cr	0.0027	0	0.0018	0.0032	0.0009
Fe3+	0	0	0	0	0
Fe2+	1.3143	1.2943	1.614	1.7626	1.7268
Mn	0.0029	0.003	0.0034	0.0053	0.0086
Mg	1.0687	1.1075	0.8698	0.6865	0.7636
Ca	0.0057	0.0032	0.007	0.0045	0.0046
Na	0.0138	0.0182	0.0217	0.0074	0.01
K	0.7997	0.8435	0.822	0.8528	0.8127
H	2	2	2	2	2
Σcations	7.8192	7.8649	7.8507	7.8647	7.8274
XMg(Fe2+)	0.448	0.461	0.35	0.28	0.307

## Sheet: Chlorite
Chlorite
SiO2	25.74	27.29	25.09	25.79	26.62
TiO2	0.04	0.49	0.01	0.04	0
Al2O3	22.46	20.83	22.23	20.78	21.88
Cr2O3	0	0	0.03	0.01	0.02
FeOtot	28.64	28.33	29.69	29.28	28.36
MnO	0.04	0.05	0.09	0.06	0
MgO	12.38	11.6	12.49	13.2	13.09
CaO	0.13	0.03	0.04	0.07	0.04
Na2O	0.02	0	0.02	0	0.01
K2O	0.15	1.46	0.1	0.03	0.06
Total	89.6	90.08	89.79	89.26	90.08
O	28	28	28	28	28
Si	5.4163	5.7376	5.2792	5.4499	5.5573
Ti	0.0062	0.0768	0.0011	0.0058	0
Al	5.5701	5.1615	5.5127	5.1754	5.3835
Cr	0	0	0.0051	0.0015	0.0028
Fe3+	0	0	0	0	0
Fe2+	5.04	4.9811	5.2244	5.1745	4.9514
Mn	0.0076	0.0084	0.0155	0.0113	0
Mg	3.8829	3.6351	3.9171	4.1577	4.0732
Ca	0.0284	0.0069	0.01	0.0161	0.0097
Na	0.0071	0.001	0.0093	0.0005	0.0054
K	0.0414	0.3916	0.0257	0.0073	0.0167
H	16	16	16	16	16
Σcations	20	20	20.0001	20	20
XMg(Fe2+)	0.435	0.422	0.428	0.446	0.451
