# Supplementary material for: Comparison between 2D and 3D microstructures and implications for metamorphic constraints using a chloritoid–garnet-bearing mica schist
Source: Copernicus journal article supplement (doi:10.5194/ejm-36-381-2024), 2024-05-03
Supplement: Supplementary file 2 [file ejm-36-381-2024-supplement.zip › Table S3.xlsx]

## Sheet: 2D modal estimate
Mineral	Mineral Grains Percentages
K-Wm	50
Qz	23.4
Pg	11.3
Cld	5
Pl	4.4
Chl	4.2
Grt	1.2
Ap	0.3
Amp	0.1
Bt	0.1
Total	100
Tot accessory minerals	0.5

## Sheet: 2D normalized modal estimate
Mineral	Mineral Grains Percentages
K-Wm	50.2
Qz	23.5
Pg	11.4
Cld	5
Pl	4.4
Chl	4.3
Grt	1.1
Bt	0.1
Total	100

## Sheet: 3D modal estimate
Mineral	Mineral Grains Percentages	XZ	YZ	XY
K-Wm	37.8	42.8	43.5	46.9
Qz	33.4	26.7	24.8	19.1
Pg	11.4	12.5	12.3	14.7
Cld	5	4.5	3.9	4.9
Pl	2.2	3.7	4.3	3.5
Chl	4	4.4	4.2	5.1
Grt	3.5	2.8	4.5	3.5
Bt	1	1.3	1.3	1.3
Total	98.3	98.7	98.8	99

## Sheet: 3D normalized modal estimate
Mineral	Mineral Grains Percentages	XZ	YZ	XY
K-Wm	38.4	43.4	44	47.4
Qz	34	27	25.1	19.3
Pg	11.6	12.7	12.4	14.8
Cld	5.1	4.6	3.9	4.9
Pl	2.2	3.7	4.4	3.6
Chl	4.1	4.5	4.3	5.2
Grt	3.6	2.8	4.6	3.5
Bt	1	1.3	1.3	1.3
Total	100	100	100	100
