# Supplementary figures and images for: Comparison between 2D and 3D microstructures and implications for metamorphic constraints using a chloritoid–garnet-bearing mica schist
Source: Copernicus journal article supplement (doi:10.5194/ejm-36-381-2024), 2024-05-03

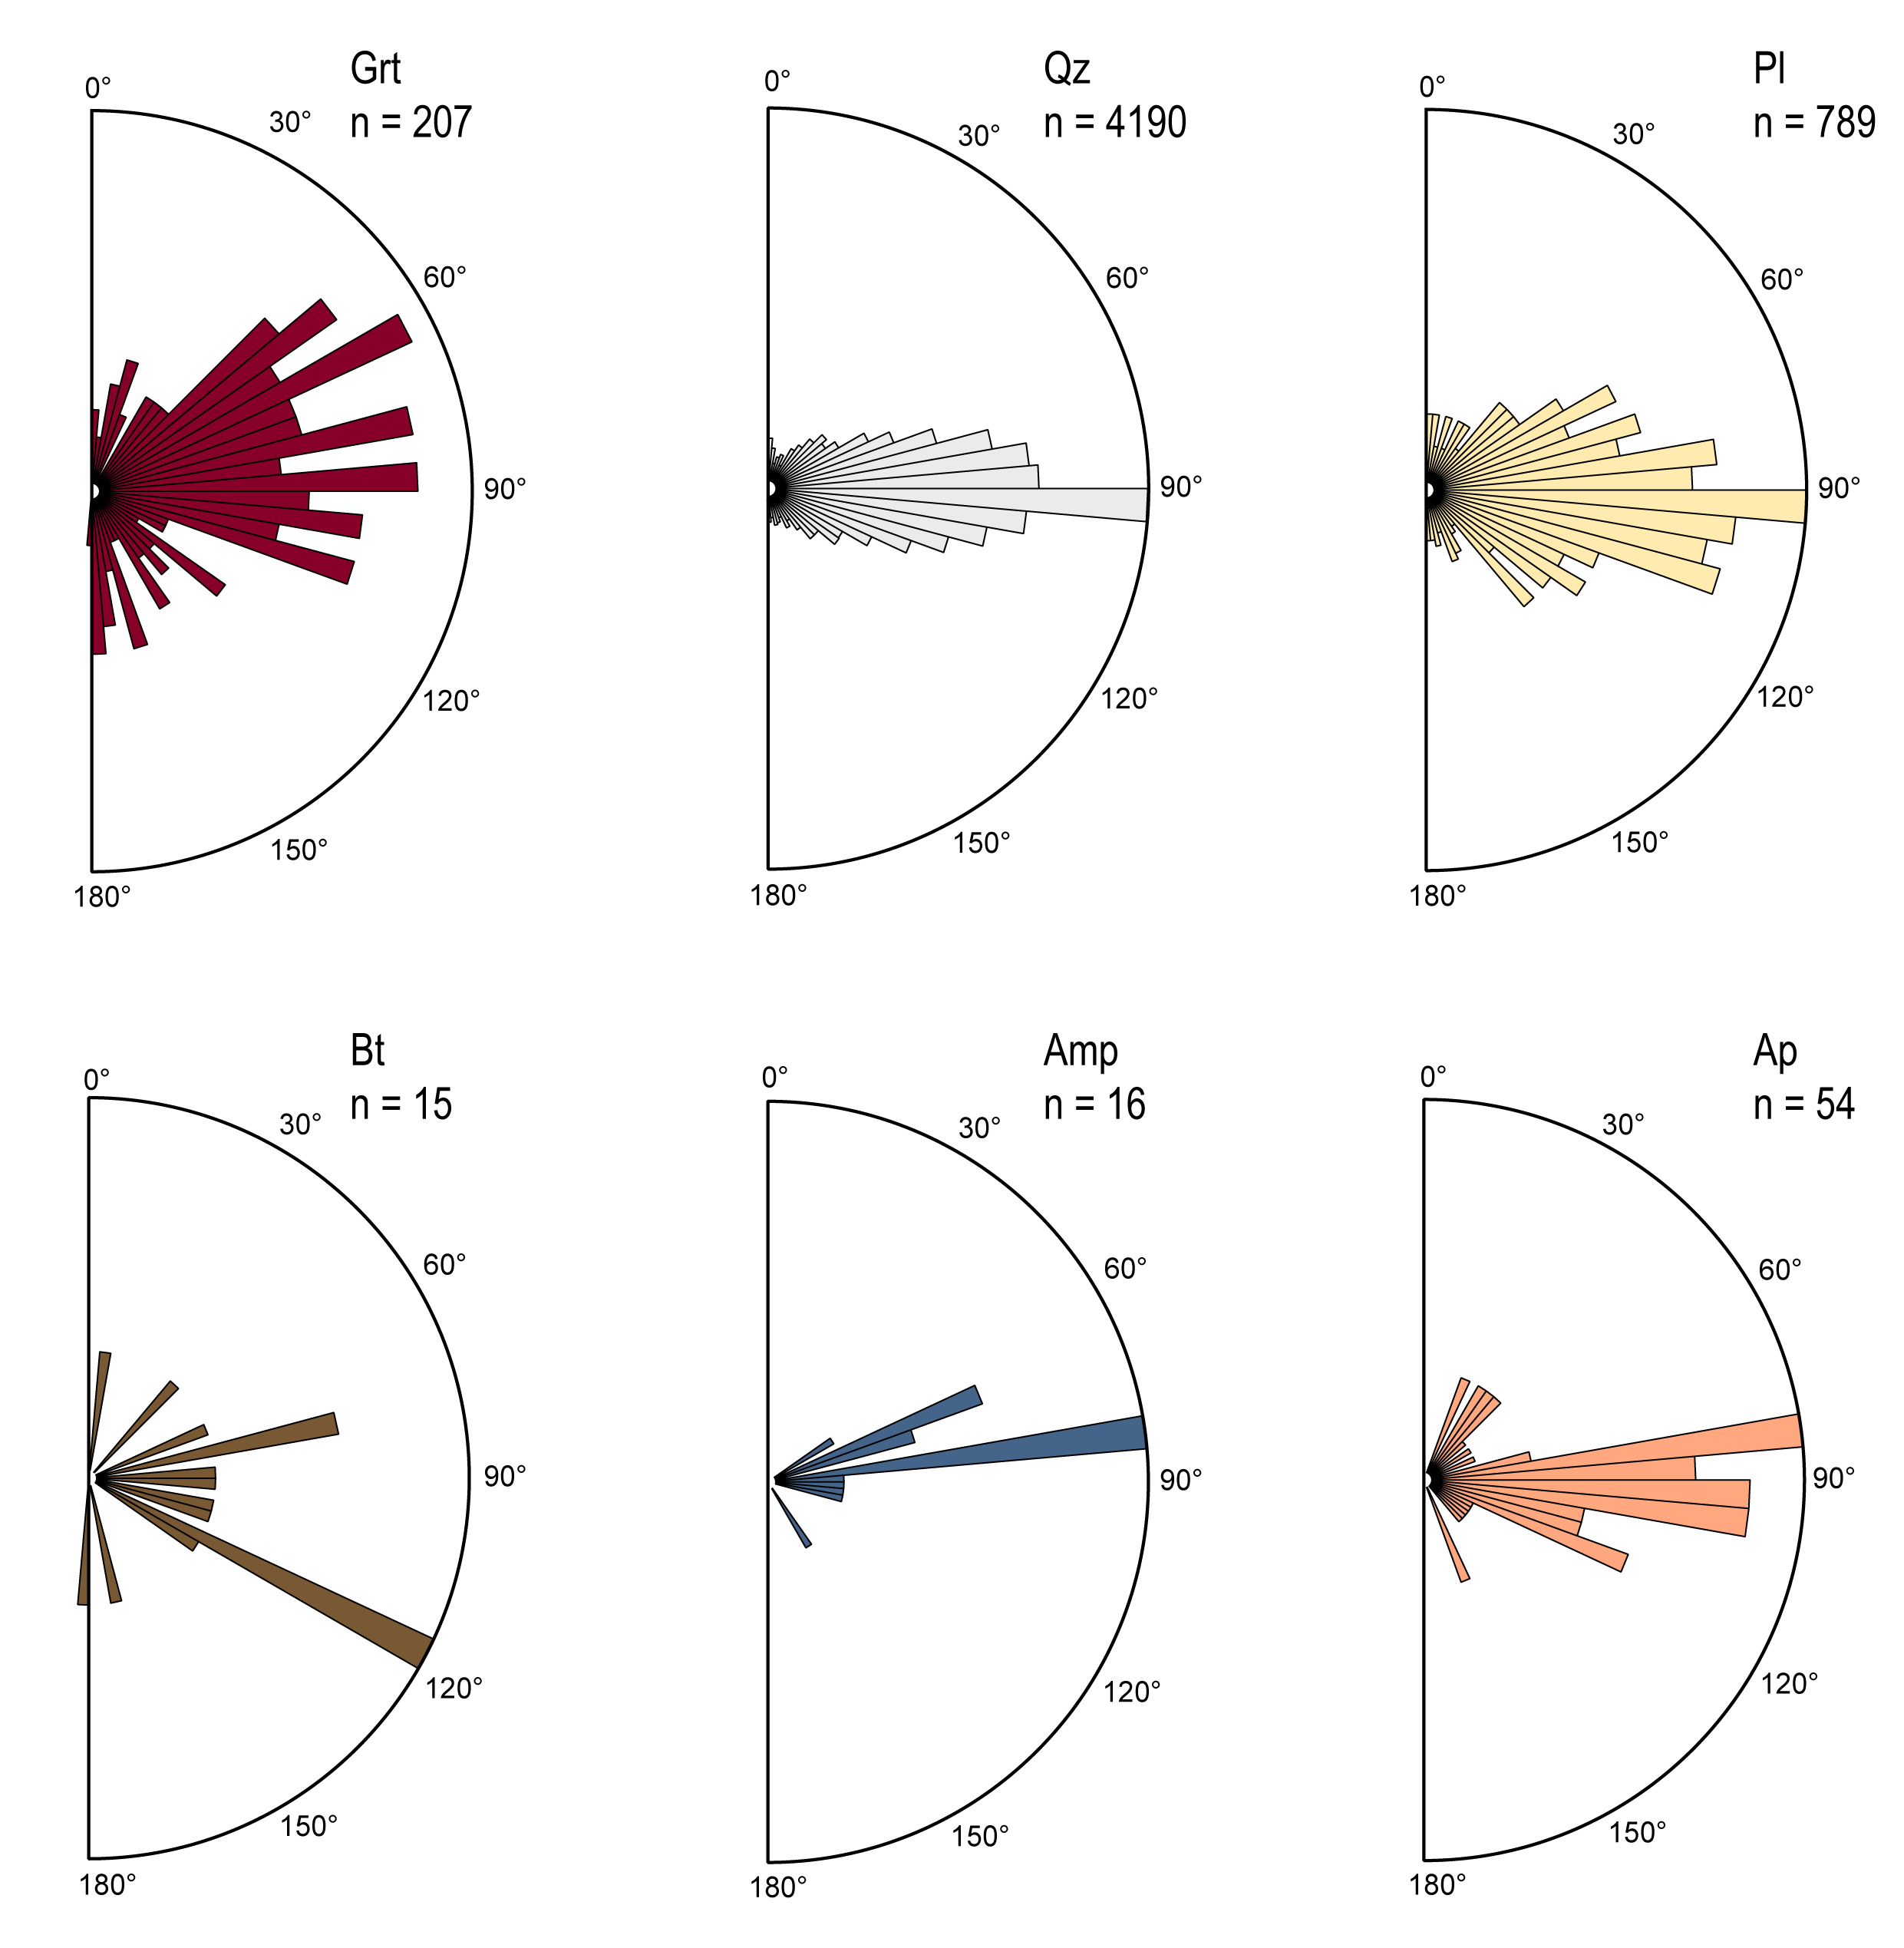

Supplement: Supplementary file 2 [file ejm-36-381-2024-supplement.zip › Figure S2.png]

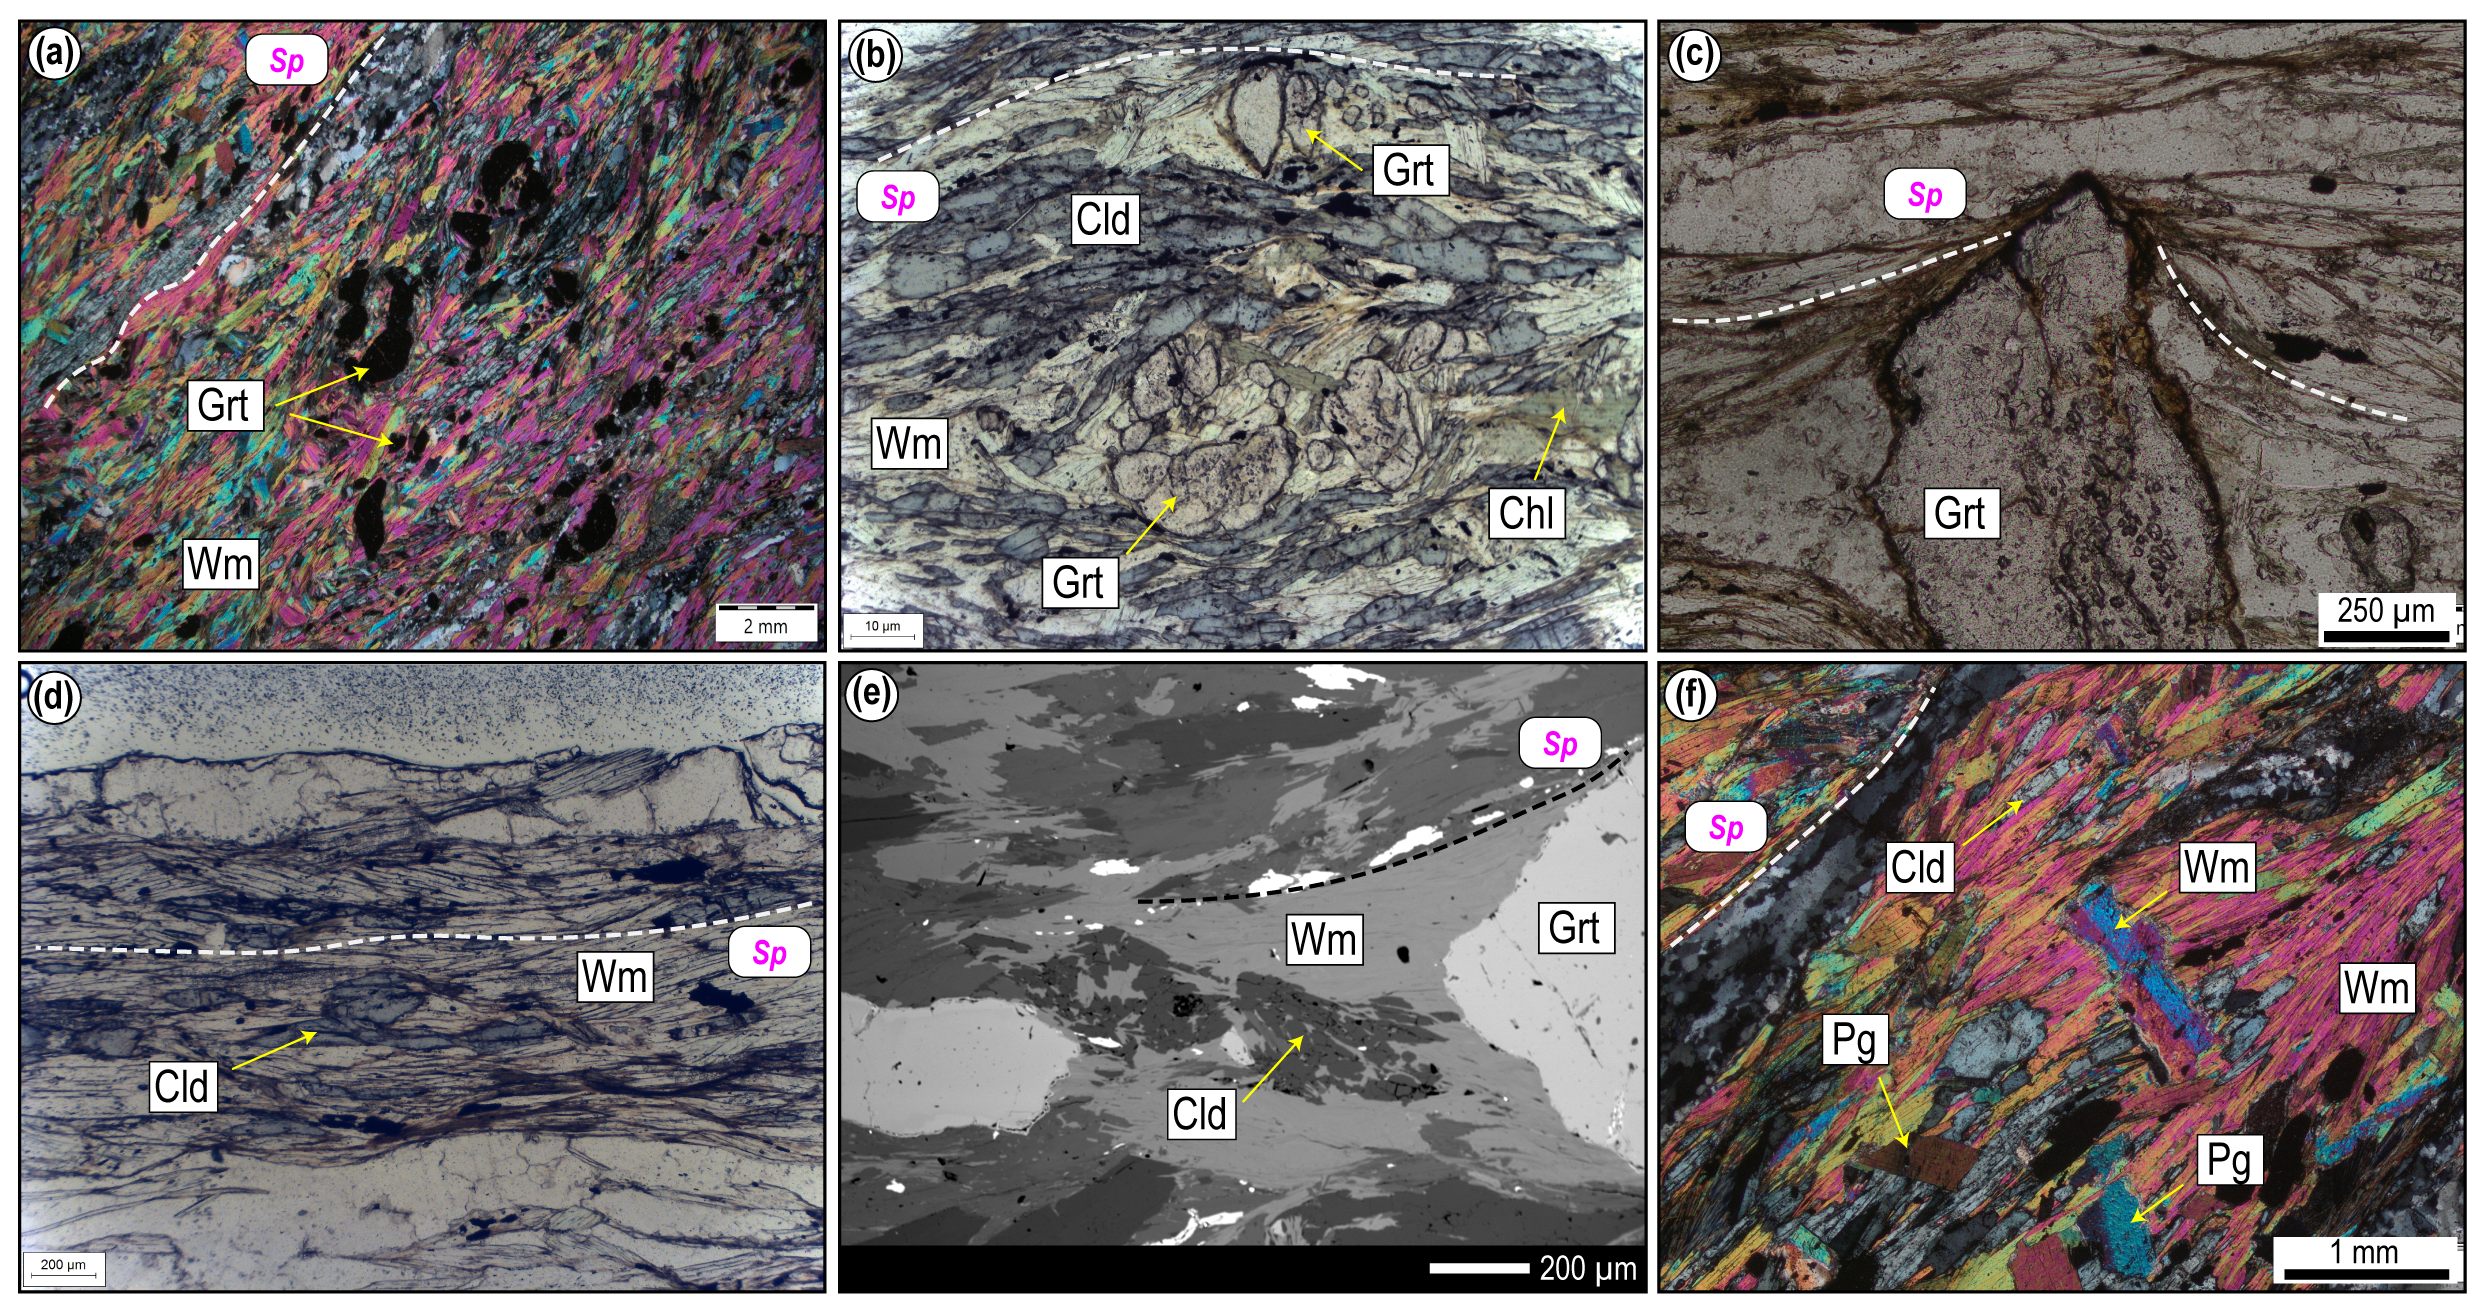

Supplement: Supplementary file 2 [file ejm-36-381-2024-supplement.zip › Figure S1.png]
